# Supplementary material for: Construction of axially chiral styrene-type allylaminesviachiral phosphoric acid-catalyzed asymmetric reductive amination
Source: Royal Society of Chemistry journal article supplement (doi:10.1039/d1qo01672e), 2021-12-20
Supplement: d1qo01672e1.pdf [file d1qo01672e1.pdf]

# Supporting Information

## Construction of Axially Chiral Styrene-Type Allylamines via Chiral Phosphoric Acid-Catalyzed Asymmetric Reductive Amination

You-Dong Shao,<sup>\*a</sup> Jin-Shuo Feng,<sup>a</sup> Dan-Dan Han,<sup>a</sup> Kang-Hui Pan,<sup>a</sup> Ling Zhang,<sup>a</sup> Yi-Fan Wang,<sup>a</sup>  
Zhong-Hui Ma,<sup>a</sup> Pei-Ru Wang,<sup>a</sup> Mingjing Yin<sup>a</sup> and Dao-Juan Cheng<sup>\*b</sup>

<sup>a</sup> School of Chemistry and Chemical Engineering, Heze University, Heze 274015, China  
E-mail: shaoyd2015@163.com

<sup>b</sup> School of Pharmacy, Anhui University of Chinese Medicine, Hefei 230012, China  
E-mail: chengdaojuan0614@163.com

### Table of Contents

|                                                                                                          |      |
|----------------------------------------------------------------------------------------------------------|------|
| General Information.....                                                                                 | S2   |
| The Absolute Stereochemistry Discussion.....                                                             | S2   |
| Screening of Catalysts and Condition Optimization.....                                                   | S21  |
| Preparation and Analytic Data of <b>1</b> .....                                                          | S23  |
| General Procedure for the Catalytic Asymmetric Synthesis of Axially Chiral Styrene-Type Allylamines..... | S30  |
| Procedure for the Scale-up Experiment and Tosylation of Product <b>4ae</b> .....                         | S30  |
| Procedure for the Control Experiment.....                                                                | S31  |
| Analytic Data for the Products.....                                                                      | S31  |
| Investigation on the Enantiomerization Barrier of <b>4ae</b> .....                                       | S45  |
| References.....                                                                                          | S46  |
| NMR Spectra of <b>1</b> .....                                                                            | S47  |
| NMR Spectra of Products.....                                                                             | S68  |
| HPLC Traces.....                                                                                         | S101 |

## General Information

$^1\text{H}$  and  $^{13}\text{C}$  NMR spectra were recorded on a Bruker AC-400 FT (400 MHz for  $^1\text{H}$  NMR and 100 MHz for  $^{13}\text{C}$  NMR, respectively) using tetramethylsilane as an internal reference. Chemical shifts ( $\delta$ ) and coupling constants ( $J$ ) were expressed in ppm and Hz, respectively. High resolution mass spectra (HRMS) were recorded on a LC-TOF spectrometer (Micromass). ESI-HRMS data were acquired using a Thermo LTQ Orbitrap XL Instrument equipped with an ESI source and controlled by Xcalibur software. High pressure liquid chromatography (HPLC) analyses were performed on a Thermo Scientific UltiMate 3000 instrument equipped with an isostatic pump, using a chiral stationary phase column (Daicel Co. CHIRALPAK). The chiral HPLC methods were calibrated with the corresponding racemic mixtures. Optical Rotation was measured on an Anton Paar MCP 100/150 polarimeter.

Chemicals were purchased from the Sinopharm Chemical Reagent Co., Adamas, Acros, Alfa Aesar, and TCI, and used as received. Catalysts **C1**, **C4** and **C5** were prepared according to the literatures.<sup>1</sup> Catalysts **C2-C3**, **C6-C12** were purchased from Daicel Chiral Technologies (China) CO., LTD. and used directly. The procedure for preparing 1-enal substituted 2-naphthols **1** is in accordance with a modified method.<sup>2</sup> Hantzsch esters **3** were prepared in accordance with the previously described procedure.<sup>3</sup>

## The Absolute Stereochemistry Discussion

In order to confirm the absolute configuration (AC) of compounds **4**, the ECD spectra were calculated by the TD-DFT method, which has been proven to be useful in predicting ECD spectra and assigning the AC of organic molecules.<sup>S1</sup> Gaussian 09 package of programs is applied for theoretical calculation.<sup>S2</sup> Geometries optimization and the Gibbs energy calculations were performed at the level of b3lyp/6-31g//6-311+g(2d,p). Calculations of ECD were performed at TDDFT/6-311+g(2d,p) level based on the optimized conformations, and then the ECD spectra were obtained by Multiwfn.<sup>S3</sup> As shown in Figure S1, the simulated spectra are in good agreement with the experimental spectral data, and the *Sa* configuration could be reliably assigned to compound **4ae**.

Compound (**4ae**) to be determined:

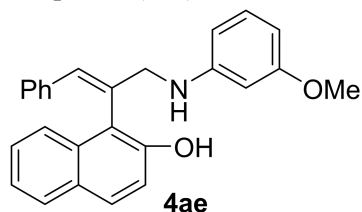

Chemical Formula:  $\text{C}_{26}\text{H}_{23}\text{NO}_2$

Exact Mass: 381.1729

Sample concentration:  $1.05 \times 10^{-4}$  mol/L (in *i*-PrOH)

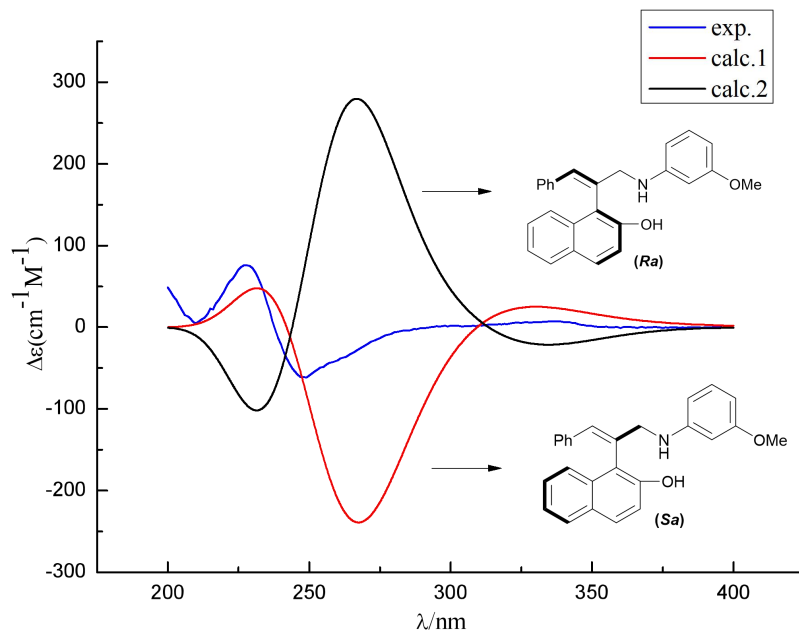

Figure S1. Experimental ECD spectra (blue line) and simulated spectra (red line) proving  $S_a$ -conformer  $C_{26}H_{23}NO_2$  **4ae** absolute configuration.

S1. N. Berova, L. D. Bari, G. Pescitelli, Application of electronic circular dichroism in configurational and conformational analysis of organic compounds. *Chem. Soc. Rev.*, 2007, **36**, 914-931.

S2. M. Frisch, G. Trucks, H. Schlegel, G. Scuseria, M. Robb, J. Cheeseman, G. Scalmani, V. Barone, B. Mennucci, G. Petersson, *Gaussian, 09, Revision A.02*, Gaussian, Inc., Wallingford CT, 2009 (2015).

S3. T. Lu, F. Chen, Multiwfn: a multifunctional wavefunction analyzer. *J. Comput. Chem.*, 2012, **33**, 580-592.

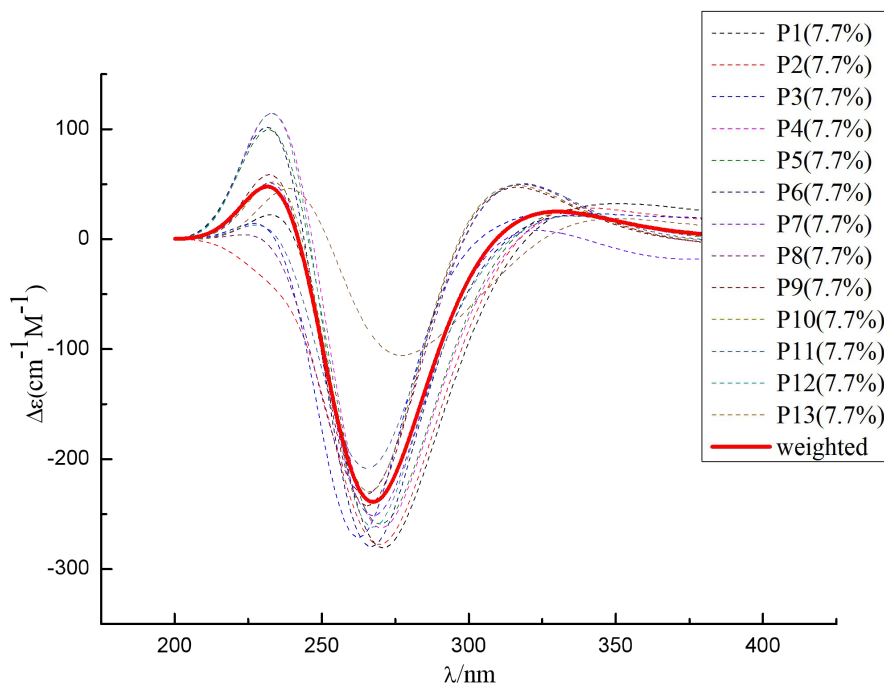

Figure S2. Simulated ECD spectra for 13 conformations of ( $S_a$ )-atropisomer of **4ae** (dash lines) and their average spectra (coarse red line).

**Table S1. Optimized geometries labeled with Gibbs free energies (Hartree) and cartesian coordinates for the 13 conformations of *Sa*-atropoisomer of 4ae (named as P1~P13) and one conformation (named as M1) of the mirror-symmetric configuration of P6, the conformation of *Sa*-atropoisomer of 4ae with the lowest energy.**

| conformations                                                                                                               | cartesian coordinates |             |             |             |
|-----------------------------------------------------------------------------------------------------------------------------|-----------------------|-------------|-------------|-------------|
| <p><b>P1</b></p> 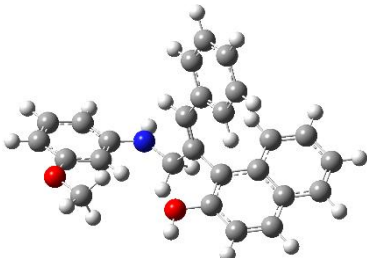 <p><b>-1209.8248</b></p> | C                     | 1.10983100  | -1.71494700 | 1.22489000  |
|                                                                                                                             | C                     | 1.35042700  | -0.95824800 | 0.08496100  |
|                                                                                                                             | C                     | 2.68728700  | -0.93197700 | -0.44472100 |
|                                                                                                                             | C                     | 3.73461700  | -1.66166300 | 0.22070500  |
|                                                                                                                             | C                     | 3.42337200  | -2.40144200 | 1.39405100  |
|                                                                                                                             | C                     | 2.13814300  | -2.42906600 | 1.88740400  |
|                                                                                                                             | H                     | 2.24371600  | 0.36011700  | -2.12488500 |
|                                                                                                                             | C                     | 3.02224400  | -0.20169600 | -1.62265600 |
|                                                                                                                             | C                     | 5.05492400  | -1.63010000 | -0.31112100 |
|                                                                                                                             | H                     | 4.21398600  | -2.94894000 | 1.89803500  |
|                                                                                                                             | H                     | 1.90478800  | -2.99701800 | 2.78461900  |
|                                                                                                                             | C                     | 5.34258900  | -0.91330400 | -1.45395900 |
|                                                                                                                             | C                     | 4.31289500  | -0.19394500 | -2.11302900 |
|                                                                                                                             | H                     | 5.83473000  | -2.18518000 | 0.20298200  |
|                                                                                                                             | H                     | 6.35235300  | -0.89576700 | -1.85085800 |
|                                                                                                                             | H                     | 4.54495800  | 0.37083900  | -3.01042800 |
|                                                                                                                             | O                     | -0.20067900 | -1.74576600 | 1.71846200  |
|                                                                                                                             | H                     | -0.26677800 | -2.30949600 | 2.51230300  |
|                                                                                                                             | C                     | 0.21735800  | -0.28448200 | -0.61868300 |
|                                                                                                                             | C                     | -0.05873200 | 1.03642100  | -0.62966400 |
|                                                                                                                             | H                     | -0.91515600 | 1.31758000  | -1.24030100 |
|                                                                                                                             | C                     | 0.58728300  | 2.17679900  | 0.04121500  |
|                                                                                                                             | C                     | 0.18758200  | 3.47313600  | -0.35491300 |
|                                                                                                                             | C                     | 1.55670500  | 2.07350600  | 1.06293000  |
|                                                                                                                             | C                     | 0.74067200  | 4.61606800  | 0.22546200  |
|                                                                                                                             | H                     | -0.56858500 | 3.57528400  | -1.12843500 |
|                                                                                                                             | C                     | 2.10751600  | 3.21737200  | 1.64547000  |
|                                                                                                                             | H                     | 1.87238300  | 1.09848300  | 1.40932300  |
|                                                                                                                             | C                     | 1.70783500  | 4.49353200  | 1.22960700  |
|                                                                                                                             | H                     | 0.41504300  | 5.59879500  | -0.10159300 |
|                                                                                                                             | H                     | 2.85022500  | 3.11151100  | 2.43053200  |
|                                                                                                                             | H                     | 2.13960000  | 5.37870900  | 1.68602900  |
|                                                                                                                             | N                     | -1.81927200 | -0.73395300 | -2.08090000 |
| H                                                                                                                           | -1.76096400           | -0.58106600 | -3.07486700 |             |
| C                                                                                                                           | -3.06203700           | -0.52993400 | -1.48042200 |             |
| C                                                                                                                           | -3.22734000           | -0.66485700 | -0.08465100 |             |
| C                                                                                                                           | -4.17146400           | -0.18107200 | -2.27846000 |             |
| C                                                                                                                           | -4.49030900           | -0.45718500 | 0.47904700  |             |



|           |   |             |             |             |
|-----------|---|-------------|-------------|-------------|
|           | H | -2.37281000 | -0.89644300 | 0.53635400  |
|           | C | -5.42013000 | 0.02212700  | -1.68606600 |
|           | H | -4.05089500 | -0.07901700 | -3.35346400 |
|           | C | -5.59832200 | -0.11490500 | -0.30893200 |
|           | H | -6.26743300 | 0.28830700  | -2.31076000 |
|           | H | -6.55795900 | 0.03973600  | 0.16794900  |
|           | O | -4.74056900 | -0.56309400 | 1.84783400  |
|           | C | -3.63877600 | -0.88274600 | 2.73371100  |
|           | H | -2.84344900 | -0.13100800 | 2.67385800  |
|           | H | -4.07056700 | -0.88933000 | 3.73455800  |
|           | H | -3.21707100 | -1.86905400 | 2.50329000  |
|           | C | -0.65301800 | -1.27638900 | -1.41115700 |
|           | H | -0.01920000 | -1.75758600 | -2.16936700 |
|           | H | -0.96294000 | -2.07691000 | -0.72505900 |
| <b>P2</b> | C | 1.08936700  | -1.75922900 | 1.20049200  |
|           | C | 1.41093400  | -0.98401000 | 0.09222300  |
|           | C | 2.77074200  | -0.98910000 | -0.37257200 |
|           | C | 3.76094300  | -1.76679900 | 0.32575800  |
|           | C | 3.36956400  | -2.52152900 | 1.46518800  |
|           | C | 2.06108100  | -2.52044200 | 1.89497100  |
|           | H | 2.45052300  | 0.35240300  | -2.04184200 |
|           | C | 3.18595800  | -0.24456100 | -1.51566400 |
|           | C | 5.10611000  | -1.76599000 | -0.14088500 |
|           | H | 4.11760800  | -3.10459400 | 1.99384000  |
|           | H | 1.76557100  | -3.10170900 | 2.76471800  |
|           | C | 5.47191100  | -1.03408800 | -1.25136400 |
|           | C | 4.49864000  | -0.26770700 | -1.94268500 |
|           | H | 5.84208100  | -2.35713200 | 0.39722700  |
|           | H | 6.50007400  | -1.04051000 | -1.59838300 |
|           | H | 4.79202600  | 0.30855300  | -2.81454800 |
|           | O | -0.24394200 | -1.75556200 | 1.61493000  |
|           | H | -0.38366800 | -2.29490700 | 2.41566400  |
|           | C | 0.32924700  | -0.25411800 | -0.63607100 |
|           | C | 0.10713500  | 1.07683800  | -0.63299900 |
|           | H | -0.72076400 | 1.40309000  | -1.26055600 |
|           | C | 0.78156600  | 2.17809900  | 0.07431700  |
|           | C | 0.47900500  | 3.49612700  | -0.33572900 |
|           | C | 1.68770000  | 2.01675800  | 1.14519400  |
|           | C | 1.06717200  | 4.60389300  | 0.27751900  |
|           | H | -0.22874600 | 3.64346500  | -1.14698400 |
|           | C | 2.27317900  | 3.12547200  | 1.76090900  |
|           | H | 1.92443100  | 1.02413600  | 1.50432300  |
|           | C | 1.97181300  | 4.42347000  | 1.33007100  |
|           | H | 0.81715900  | 5.60460100  | -0.06163900 |

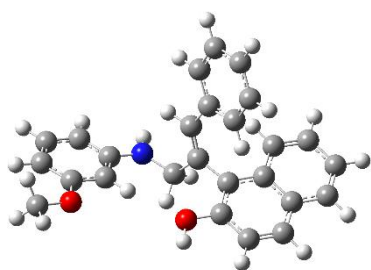

**-1209.8256**

|                                                                                     |   |             |             |             |
|-------------------------------------------------------------------------------------|---|-------------|-------------|-------------|
|                                                                                     | H | 2.96507300  | 2.97503600  | 2.58420700  |
|                                                                                     | H | 2.43014800  | 5.28117700  | 1.81241100  |
|                                                                                     | N | -1.70660500 | -0.60212500 | -2.12540000 |
|                                                                                     | H | -1.62372100 | -0.37286100 | -3.10281400 |
|                                                                                     | C | -2.95560900 | -0.42142600 | -1.53428100 |
|                                                                                     | C | -3.16920200 | -0.66709600 | -0.16736800 |
|                                                                                     | C | -4.04085100 | 0.01747200  | -2.33236500 |
|                                                                                     | C | -4.44682000 | -0.49268300 | 0.37848900  |
|                                                                                     | H | -2.36389400 | -0.96354800 | 0.49276700  |
|                                                                                     | C | -5.29764800 | 0.19155100  | -1.76333100 |
|                                                                                     | H | -3.88642600 | 0.20984600  | -3.39063800 |
|                                                                                     | C | -5.52673800 | -0.06276100 | -0.40267600 |
|                                                                                     | H | -6.12198700 | 0.52670800  | -2.38589700 |
|                                                                                     | H | -6.51449900 | 0.07662300  | 0.01667300  |
|                                                                                     | O | -4.54065300 | -0.77545300 | 1.74369200  |
|                                                                                     | C | -5.81568100 | -0.58299500 | 2.40358900  |
|                                                                                     | H | -6.58847100 | -1.23796100 | 1.98267100  |
|                                                                                     | H | -5.64179400 | -0.84572600 | 3.44704800  |
|                                                                                     | H | -6.14792900 | 0.46012900  | 2.33658200  |
|                                                                                     | C | -0.55826800 | -1.19623900 | -1.46823100 |
|                                                                                     | H | 0.06925300  | -1.66785500 | -2.23804000 |
|                                                                                     | H | -0.89656500 | -2.00941300 | -0.81296300 |
| <b>P3</b>                                                                           | C | -1.72228700 | -1.65345900 | -1.45941700 |
| 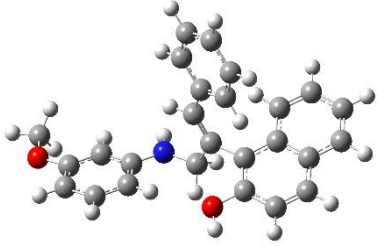 | C | -1.67091600 | -0.97035600 | -0.25019900 |
|                                                                                     | C | -2.85413500 | -0.93989300 | 0.56604200  |
|                                                                                     | C | -4.05525900 | -1.58785500 | 0.10765400  |
|                                                                                     | C | -4.04552700 | -2.25231000 | -1.14906800 |
|                                                                                     | C | -2.90359900 | -2.28650100 | -1.91785400 |
|                                                                                     | H | -1.99146700 | 0.21506700  | 2.18174600  |
|                                                                                     | C | -2.88689200 | -0.28490700 | 1.83221200  |
|                                                                                     | C | -5.22258900 | -1.55264900 | 0.92202000  |
|                                                                                     | H | -4.95269300 | -2.73745800 | -1.49635100 |
|                                                                                     | H | -2.90012600 | -2.79794900 | -2.87716200 |
|                                                                                     | C | -5.21757600 | -0.90985300 | 2.14243300  |
|                                                                                     | C | -4.03555300 | -0.27158300 | 2.59810800  |
|                                                                                     | H | -6.12144200 | -2.04539800 | 0.56165600  |
|                                                                                     | H | -6.11293700 | -0.88885900 | 2.75514600  |
|                                                                                     | H | -4.03733000 | 0.23518400  | 3.55802800  |
|                                                                                     | O | -0.55438800 | -1.69041800 | -2.22689500 |
|                                                                                     | H | -0.68714000 | -2.17470900 | -3.06352600 |
|                                                                                     | C | -0.37951100 | -0.38036000 | 0.21622300  |
|                                                                                     | C | -0.05622400 | 0.92908000  | 0.25841200  |
|                                                                                     | H | 0.92876800  | 1.14316000  | 0.66997200  |
|                                                                                     | C | -0.79644300 | 2.13188900  | -0.15786600 |

**-1209.8223**

|                                                                                     |   |             |             |             |
|-------------------------------------------------------------------------------------|---|-------------|-------------|-------------|
|                                                                                     | C | -0.28598700 | 3.38387300  | 0.25301800  |
|                                                                                     | C | -1.96178600 | 2.12904800  | -0.95532900 |
|                                                                                     | C | -0.91760700 | 4.57903700  | -0.09591400 |
|                                                                                     | H | 0.61953700  | 3.40969100  | 0.85306000  |
|                                                                                     | C | -2.59151200 | 3.32522300  | -1.30708600 |
|                                                                                     | H | -2.36830300 | 1.19148300  | -1.31041000 |
|                                                                                     | C | -2.07827000 | 4.55542600  | -0.87762600 |
|                                                                                     | H | -0.50306500 | 5.52573600  | 0.23692400  |
|                                                                                     | H | -3.48519600 | 3.29664200  | -1.92324500 |
|                                                                                     | H | -2.57201700 | 5.48171700  | -1.15426000 |
|                                                                                     | N | 1.91841600  | -0.98836200 | 1.13229400  |
|                                                                                     | H | 2.07641000  | -0.87952700 | 2.12128800  |
|                                                                                     | C | 3.00754900  | -0.78667700 | 0.28446700  |
|                                                                                     | C | 4.27309500  | -0.51527000 | 0.85647000  |
|                                                                                     | C | 2.88197500  | -0.84802900 | -1.11733300 |
|                                                                                     | C | 5.38223000  | -0.31708800 | 0.03296400  |
|                                                                                     | H | 4.36437500  | -0.47483600 | 1.93637700  |
|                                                                                     | C | 4.01497500  | -0.65109000 | -1.91633200 |
|                                                                                     | H | 1.91541000  | -1.01741800 | -1.57577800 |
|                                                                                     | C | 5.26677100  | -0.38673900 | -1.36386800 |
|                                                                                     | H | 3.91010300  | -0.69643300 | -2.99624600 |
|                                                                                     | H | 6.14759200  | -0.22831200 | -1.97331000 |
|                                                                                     | O | 6.66455800  | -0.04635400 | 0.51453700  |
|                                                                                     | C | 6.86892900  | 0.04683600  | 1.94502500  |
|                                                                                     | H | 6.62820400  | -0.89853200 | 2.44714000  |
|                                                                                     | H | 7.92879400  | 0.26758400  | 2.06999100  |
|                                                                                     | H | 6.27019400  | 0.85471300  | 2.38388800  |
|                                                                                     | C | 0.61138200  | -1.45087100 | 0.70559800  |
|                                                                                     | H | 0.14872400  | -1.98632100 | 1.54694000  |
|                                                                                     | H | 0.73192600  | -2.19205100 | -0.09558500 |
| <b>P4</b>                                                                           | C | 1.25209100  | 1.71367900  | -1.54908500 |
| 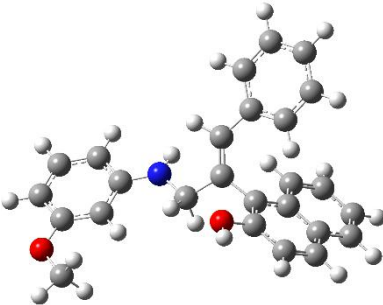 | C | 1.30175000  | 0.96452800  | -0.38020100 |
|                                                                                     | C | 2.23512300  | 1.35180600  | 0.64154200  |
|                                                                                     | C | 3.10843200  | 2.47498300  | 0.42072700  |
|                                                                                     | C | 3.02417100  | 3.18497000  | -0.80806900 |
|                                                                                     | C | 2.11410500  | 2.81581100  | -1.77302100 |
|                                                                                     | H | 1.68757100  | -0.19090100 | 2.05917800  |
|                                                                                     | C | 2.33455900  | 0.66022000  | 1.88440800  |
|                                                                                     | C | 4.03262300  | 2.85219100  | 1.43581000  |
|                                                                                     | H | 3.68590300  | 4.02934600  | -0.97559900 |
|                                                                                     | H | 2.04844800  | 3.36595300  | -2.70836200 |
|                                                                                     | C | 4.10050500  | 2.15976800  | 2.62681400  |
|                                                                                     | C | 3.24028300  | 1.05405800  | 2.84906300  |
| <b>-1209.8241</b>                                                                   |   |             |             |             |

|           |   |             |             |             |
|-----------|---|-------------|-------------|-------------|
|           | H | 4.68538300  | 3.70139200  | 1.25333700  |
|           | H | 4.80804600  | 2.45602000  | 3.39429300  |
|           | H | 3.29766800  | 0.51183200  | 3.78758700  |
|           | O | 0.31043100  | 1.34032300  | -2.51127000 |
|           | H | 0.38535800  | 1.88517800  | -3.31739400 |
|           | C | 0.33277400  | -0.15777500 | -0.17764500 |
|           | C | 0.61774800  | -1.47772700 | -0.24517400 |
|           | H | -0.22420800 | -2.14571100 | -0.07064100 |
|           | C | 1.87402200  | -2.19369100 | -0.52767900 |
|           | C | 1.90210100  | -3.58087800 | -0.25847900 |
|           | C | 3.03881800  | -1.60764600 | -1.06957700 |
|           | C | 3.04386900  | -4.34761600 | -0.49774000 |
|           | H | 1.01142000  | -4.05583200 | 0.14411400  |
|           | C | 4.18025100  | -2.37581500 | -1.31126600 |
|           | H | 3.04804800  | -0.55403200 | -1.31355000 |
|           | C | 4.19284300  | -3.74631300 | -1.02407900 |
|           | H | 3.03600200  | -5.41075300 | -0.27788200 |
|           | H | 5.06289500  | -1.90213400 | -1.73020300 |
|           | H | 5.08294700  | -4.33771000 | -1.21422600 |
|           | N | -1.92172300 | -0.66018700 | 0.77291600  |
|           | H | -1.46450100 | -1.19626300 | 1.49584700  |
|           | C | -3.31452200 | -0.68158400 | 0.77188000  |
|           | C | -4.07641500 | 0.22646300  | 0.00340200  |
|           | C | -3.98668900 | -1.64279600 | 1.55834800  |
|           | C | -5.47361700 | 0.14456800  | 0.01834400  |
|           | H | -3.57990000 | 0.98504500  | -0.58453400 |
|           | C | -5.38109300 | -1.69580000 | 1.56111600  |
|           | H | -3.40972700 | -2.34601100 | 2.15220000  |
|           | C | -6.14174400 | -0.81144200 | 0.79416900  |
|           | H | -5.88260700 | -2.44192500 | 2.16994700  |
|           | H | -7.22390900 | -0.83861800 | 0.78226000  |
|           | O | -6.29814300 | 0.99883900  | -0.71529000 |
|           | C | -5.69193000 | 2.01541200  | -1.55036400 |
|           | H | -5.05058000 | 1.57082700  | -2.32126700 |
|           | H | -6.52678000 | 2.53339800  | -2.02194900 |
|           | H | -5.10643400 | 2.72690400  | -0.95503700 |
|           | C | -1.09695000 | 0.32244500  | 0.08838800  |
|           | H | -1.04632600 | 1.27314100  | 0.64698100  |
|           | H | -1.54959800 | 0.55793500  | -0.88284200 |
| <b>P5</b> | C | -1.35476000 | 1.67451400  | 1.62878600  |
|           | C | -1.40080500 | 0.96840800  | 0.43302700  |
|           | C | -2.34373300 | 1.38104900  | -0.56959900 |
|           | C | -3.22890900 | 2.48521800  | -0.30429500 |
|           | C | -3.14645400 | 3.15156400  | 0.94883100  |

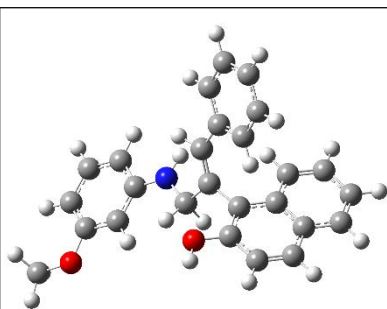

**-1209.8246**

|   |             |             |             |
|---|-------------|-------------|-------------|
| C | -2.22815200 | 2.75789500  | 1.89609000  |
| H | -1.78436000 | -0.10162400 | -2.04542200 |
| C | -2.44075700 | 0.73453200  | -1.83675700 |
| C | -4.16220600 | 2.88819700  | -1.30096200 |
| H | -3.81655900 | 3.98202600  | 1.14946400  |
| H | -2.16484700 | 3.27382600  | 2.85084000  |
| C | -4.22778400 | 2.23897900  | -2.51619500 |
| C | -3.35559000 | 1.15252000  | -2.78245600 |
| H | -4.82378000 | 3.72256300  | -1.08476100 |
| H | -4.94242600 | 2.55467700  | -3.26924800 |
| H | -3.41095900 | 0.64433700  | -3.74000200 |
| O | -0.40789000 | 1.27331600  | 2.57307400  |
| H | -0.45809300 | 1.81105200  | 3.38578900  |
| C | -0.41502100 | -0.12985100 | 0.18450800  |
| C | -0.67960500 | -1.45567400 | 0.19625700  |
| H | 0.17230000  | -2.10281500 | -0.00617700 |
| C | -1.92474100 | -2.20148600 | 0.44956700  |
| C | -1.93498400 | -3.57540500 | 0.11827600  |
| C | -3.09530900 | -1.65673700 | 1.02124700  |
| C | -3.06524500 | -4.36787700 | 0.32641100  |
| H | -1.03934400 | -4.01934200 | -0.30807800 |
| C | -4.22523500 | -2.45068500 | 1.23173800  |
| H | -3.11751100 | -0.61549300 | 1.31289800  |
| C | -4.22034300 | -3.80688700 | 0.88302800  |
| H | -3.04367500 | -5.41988500 | 0.05889000  |
| H | -5.11250400 | -2.00857400 | 1.67475800  |
| H | -5.10153900 | -4.41852400 | 1.04927000  |
| N | 1.85280400  | -0.55914300 | -0.77317400 |
| H | 1.41469200  | -1.07032600 | -1.52537100 |
| C | 3.24397800  | -0.55871400 | -0.74701300 |
| C | 3.98280600  | 0.31944000  | 0.06340700  |
| C | 3.94595100  | -1.48206200 | -1.56343600 |
| C | 5.38243600  | 0.26006300  | 0.07194500  |
| H | 3.50788600  | 1.06184000  | 0.69040200  |
| C | 5.33488300  | -1.51662200 | -1.54464000 |
| H | 3.38851100  | -2.16774100 | -2.19533000 |
| C | 6.08031200  | -0.65197900 | -0.72746600 |
| H | 5.85720300  | -2.23089400 | -2.17420800 |
| H | 7.16129800  | -0.69927700 | -0.72897100 |
| O | 5.99670500  | 1.18058400  | 0.92280300  |
| C | 7.44398400  | 1.20154600  | 0.99187200  |
| H | 7.88756600  | 1.44007200  | 0.01758100  |
| H | 7.68552600  | 1.98730400  | 1.70738600  |
| H | 7.84121700  | 0.24323900  | 1.34775100  |

|                                                                                   |            |             |             |             |
|-----------------------------------------------------------------------------------|------------|-------------|-------------|-------------|
|                                                                                   | C          | 1.00616700  | 0.38464700  | -0.06066600 |
|                                                                                   | H          | 0.94063000  | 1.35127900  | -0.58906100 |
|                                                                                   | H          | 1.45331400  | 0.59750500  | 0.91778600  |
| <b>P6</b>                                                                         | C          | -1.99818400 | 1.59949200  | 1.67038500  |
| 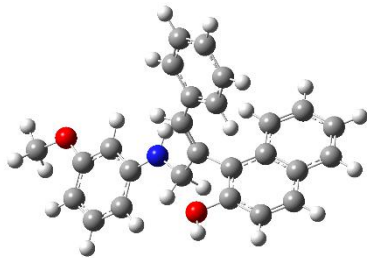 | C          | -1.71762600 | 0.94199100  | 0.47906700  |
|                                                                                   | C          | -2.56932300 | 1.18369300  | -0.65277800 |
|                                                                                   | C          | -3.69789500 | 2.06785100  | -0.52005100 |
|                                                                                   | C          | -3.94363400 | 2.69141500  | 0.73370900  |
|                                                                                   | C          | -3.11139600 | 2.46553700  | 1.80701100  |
|                                                                                   | H          | -1.49806300 | -0.09658800 | -2.03220000 |
|                                                                                   | C          | -2.34012500 | 0.57602000  | -1.92213600 |
|                                                                                   | C          | -4.53905700 | 2.30145400  | -1.64462500 |
|                                                                                   | H          | -4.79707000 | 3.35511900  | 0.83424800  |
|                                                                                   | H          | -3.29959800 | 2.94935600  | 2.76216700  |
|                                                                                   | C          | -4.28633100 | 1.69619900  | -2.85804100 |
|                                                                                   | C          | -3.17409600 | 0.82636600  | -2.99350000 |
|                                                                                   | H          | -5.38720200 | 2.97047700  | -1.52780100 |
|                                                                                   | H          | -4.93339900 | 1.88161400  | -3.70914500 |
|                                                                                   | H          | -2.97943200 | 0.35185000  | -3.95010900 |
|                                                                                   | O          | -1.13521200 | 1.37502300  | 2.74536200  |
|                                                                                   | H          | -1.42940100 | 1.84645700  | 3.54751600  |
|                                                                                   | C          | -0.49697000 | 0.08219700  | 0.37754700  |
|                                                                                   | C          | -0.47377500 | -1.26926800 | 0.35146900  |
|                                                                                   | H          | 0.51606000  | -1.71643600 | 0.27560000  |
|                                                                                   | C          | -1.55526700 | -2.26737800 | 0.42032300  |
|                                                                                   | C          | -1.22325000 | -3.60343500 | 0.10041600  |
|                                                                                   | C          | -2.88668400 | -1.99739300 | 0.80543400  |
|                                                                                   | C          | -2.17677900 | -4.62219000 | 0.14167800  |
|                                                                                   | H          | -0.20060300 | -3.83666900 | -0.18372500 |
|                                                                                   | C          | -3.83992200 | -3.01762000 | 0.84895600  |
|                                                                                   | H          | -3.17364900 | -0.99216600 | 1.08272000  |
|                                                                                   | C          | -3.49438200 | -4.33276300 | 0.51441800  |
|                                                                                   | H          | -1.89207000 | -5.63856300 | -0.11256200 |
|                                                                                   | H          | -4.85682300 | -2.78471000 | 1.15006000  |
|                                                                                   | H          | -4.23971300 | -5.12107900 | 0.55030000  |
|                                                                                   | N          | 1.92529700  | 0.16398200  | -0.23196000 |
|                                                                                   | H          | 1.72075900  | -0.39860300 | -1.04493000 |
| C                                                                                 | 3.26837000 | 0.42989300  | 0.01905600  |             |
| C                                                                                 | 4.24764600 | -0.29855900 | -0.68404000 |             |
| C                                                                                 | 3.69161700 | 1.40040200  | 0.95787600  |             |
| C                                                                                 | 5.60566500 | -0.07558200 | -0.45172300 |             |
| H                                                                                 | 3.96619800 | -1.05259200 | -1.41155900 |             |
| C                                                                                 | 5.05413600 | 1.60078200  | 1.17835000  |             |
| H                                                                                 | 2.96917600 | 1.99563300  | 1.50167900  |             |

|                                                                                                             |   |             |             |             |
|-------------------------------------------------------------------------------------------------------------|---|-------------|-------------|-------------|
|                                                                                                             | C | 6.03209900  | 0.87627200  | 0.48636400  |
|                                                                                                             | H | 5.36531200  | 2.34740000  | 1.90314100  |
|                                                                                                             | H | 7.08171500  | 1.05847800  | 0.67613300  |
|                                                                                                             | O | 6.47103700  | -0.86335400 | -1.21283300 |
|                                                                                                             | C | 7.89937000  | -0.70128400 | -1.02812700 |
|                                                                                                             | H | 8.19901600  | -0.93571300 | 0.00047000  |
|                                                                                                             | H | 8.35926100  | -1.41143700 | -1.71504800 |
|                                                                                                             | H | 8.22246500  | 0.31641600  | -1.27853600 |
|                                                                                                             | C | 0.80359000  | 0.89055400  | 0.34119500  |
|                                                                                                             | H | 0.61097000  | 1.83398900  | -0.19808500 |
|                                                                                                             | H | 1.04564200  | 1.16867500  | 1.37374700  |
| <b>P7</b>                                                                                                   | C | -0.44609900 | -0.53319500 | 1.58033000  |
| 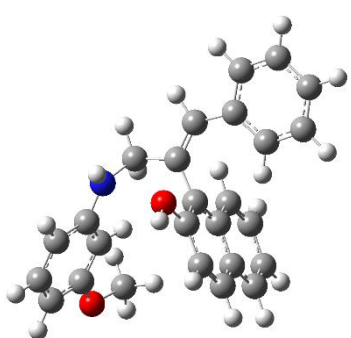 <p><b>-1209.8262</b></p> | C | -0.61733500 | -0.01182400 | 0.30518800  |
|                                                                                                             | C | -0.28724100 | 1.36630800  | 0.07701600  |
|                                                                                                             | C | 0.21050300  | 2.17229300  | 1.16001900  |
|                                                                                                             | C | 0.35461500  | 1.58267700  | 2.44568100  |
|                                                                                                             | C | 0.03012300  | 0.26126600  | 2.65345900  |
|                                                                                                             | H | -0.84695700 | 1.39061000  | -2.01759800 |
|                                                                                                             | C | -0.44081800 | 1.97929900  | -1.20223500 |
|                                                                                                             | C | 0.54835700  | 3.53381800  | 0.91830600  |
|                                                                                                             | H | 0.73104000  | 2.18785500  | 3.26465000  |
|                                                                                                             | H | 0.15063500  | -0.18558700 | 3.63697600  |
|                                                                                                             | C | 0.40133900  | 4.09101300  | -0.33592300 |
|                                                                                                             | C | -0.10314400 | 3.30346600  | -1.40313900 |
|                                                                                                             | H | 0.92616100  | 4.12923800  | 1.74483200  |
|                                                                                                             | H | 0.66171600  | 5.13021400  | -0.50836500 |
|                                                                                                             | H | -0.23152300 | 3.75048600  | -2.38404100 |
|                                                                                                             | O | -0.75470800 | -1.87979000 | 1.77961100  |
|                                                                                                             | H | -0.60825100 | -2.14253700 | 2.70828300  |
|                                                                                                             | C | -1.02931700 | -0.90005600 | -0.82419500 |
|                                                                                                             | C | -2.29581400 | -1.20731100 | -1.18527400 |
|                                                                                                             | H | -2.38787900 | -1.90597800 | -2.01828500 |
|                                                                                                             | C | -3.60197900 | -0.78390600 | -0.65518200 |
|                                                                                                             | C | -4.75077800 | -1.41006400 | -1.18939800 |
|                                                                                                             | C | -3.79468000 | 0.20502200  | 0.33450100  |
|                                                                                                             | C | -6.03381300 | -1.07671700 | -0.75196200 |
|                                                                                                             | H | -4.62623200 | -2.17012400 | -1.95610100 |
|                                                                                                             | C | -5.07891300 | 0.53966200  | 0.77002700  |
|                                                                                                             | H | -2.94207600 | 0.71688100  | 0.75919700  |
|                                                                                                             | C | -6.20455300 | -0.09795000 | 0.23356500  |
|                                                                                                             | H | -6.89699500 | -1.57751200 | -1.17947100 |
|                                                                                                             | H | -5.20113700 | 1.30519300  | 1.53028300  |
|                                                                                                             | H | -7.19974200 | 0.16712500  | 0.57637100  |
|                                                                                                             | N | 1.05352500  | -2.28755600 | -0.77351600 |

|                                                                                     |   |             |             |             |
|-------------------------------------------------------------------------------------|---|-------------|-------------|-------------|
|                                                                                     | H | 0.63207000  | -3.04527200 | -0.25639500 |
|                                                                                     | C | 2.33457000  | -1.91575900 | -0.37070700 |
|                                                                                     | C | 2.94661500  | -0.70859300 | -0.77637700 |
|                                                                                     | C | 3.05503900  | -2.79067900 | 0.47337600  |
|                                                                                     | C | 4.24368400  | -0.40770800 | -0.34757000 |
|                                                                                     | H | 2.40589800  | -0.00478800 | -1.39238000 |
|                                                                                     | C | 4.34789700  | -2.46535000 | 0.88706800  |
|                                                                                     | H | 2.59870500  | -3.72601700 | 0.78462700  |
|                                                                                     | C | 4.96096700  | -1.27819000 | 0.48446100  |
|                                                                                     | H | 4.88705200  | -3.15291100 | 1.53204000  |
|                                                                                     | H | 5.96253900  | -1.00819600 | 0.79419700  |
|                                                                                     | O | 4.91113100  | 0.76643700  | -0.69813900 |
|                                                                                     | C | 4.23269900  | 1.73990900  | -1.53144600 |
|                                                                                     | H | 3.32495400  | 2.12008500  | -1.04798100 |
|                                                                                     | H | 4.94804100  | 2.55204100  | -1.66033400 |
|                                                                                     | H | 3.97550100  | 1.31807400  | -2.51090400 |
|                                                                                     | C | 0.13270800  | -1.52296500 | -1.60449500 |
|                                                                                     | H | -0.27899000 | -2.17367800 | -2.38819100 |
|                                                                                     | H | 0.70162700  | -0.74225100 | -2.11914700 |
| <b>P8</b>                                                                           | C | -0.65421100 | 0.52331300  | 1.62880100  |
| 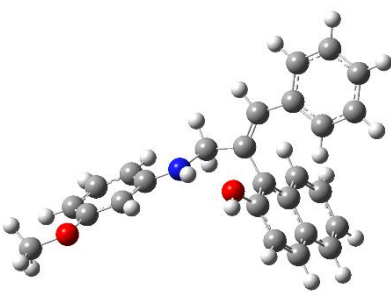 | C | -1.04781000 | 0.51159500  | 0.29839800  |
|                                                                                     | C | -1.66629800 | 1.69129700  | -0.24006900 |
|                                                                                     | C | -1.87185600 | 2.83929800  | 0.60323000  |
|                                                                                     | C | -1.45759000 | 2.78014100  | 1.96177100  |
|                                                                                     | C | -0.86057600 | 1.64652200  | 2.46633200  |
|                                                                                     | H | -1.97029200 | 0.90065700  | -2.23490900 |
|                                                                                     | C | -2.10174900 | 1.76639100  | -1.59597200 |
|                                                                                     | C | -2.48551700 | 4.00342300  | 0.05987500  |
|                                                                                     | H | -1.61309500 | 3.64515700  | 2.59916400  |
|                                                                                     | H | -0.53576500 | 1.60959900  | 3.50294700  |
|                                                                                     | C | -2.88685100 | 4.04397300  | -1.25922700 |
|                                                                                     | C | -2.69336600 | 2.91128100  | -2.09118900 |
|                                                                                     | H | -2.63214800 | 4.86314000  | 0.70778300  |
|                                                                                     | H | -3.35260300 | 4.93673600  | -1.66348500 |
|                                                                                     | H | -3.01728100 | 2.94635700  | -3.12653100 |
|                                                                                     | O | -0.02390700 | -0.62430200 | 2.13019400  |
|                                                                                     | H | 0.14788700  | -0.55224500 | 3.08801200  |
|                                                                                     | C | -0.76938300 | -0.67730900 | -0.57125600 |
|                                                                                     | C | -1.61036100 | -1.71350800 | -0.79253700 |
|                                                                                     | H | -1.22484400 | -2.49088800 | -1.45235200 |
|                                                                                     | C | -2.96798200 | -2.00901900 | -0.30562900 |
|                                                                                     | C | -3.55671000 | -3.21794000 | -0.74141500 |
|                                                                                     | C | -3.72453800 | -1.18559100 | 0.55720700  |
|                                                                                     | C | -4.83909200 | -3.59295900 | -0.33757200 |
| <b>-1209.8233</b>                                                                   |   |             |             |             |



|                                                                                     |   |             |             |             |
|-------------------------------------------------------------------------------------|---|-------------|-------------|-------------|
|                                                                                     | H | -2.99239100 | -3.86751600 | -1.40504200 |
|                                                                                     | C | -5.00828400 | -1.56101500 | 0.95979300  |
|                                                                                     | H | -3.31222600 | -0.25186100 | 0.91313200  |
|                                                                                     | C | -5.57345300 | -2.76346500 | 0.51736900  |
|                                                                                     | H | -5.26363100 | -4.52836300 | -0.68866800 |
|                                                                                     | H | -5.57052100 | -0.90982400 | 1.62214400  |
|                                                                                     | H | -6.57155300 | -3.04892400 | 0.83429900  |
|                                                                                     | N | 1.66941600  | -0.78628700 | -0.27376100 |
|                                                                                     | H | 1.39618100  | -1.01874800 | 0.67159100  |
|                                                                                     | C | 3.00646700  | -0.58298500 | -0.55816900 |
|                                                                                     | C | 3.95588400  | -0.66336100 | 0.48190600  |
|                                                                                     | C | 3.46268700  | -0.29824700 | -1.86924000 |
|                                                                                     | C | 5.31162800  | -0.46218600 | 0.22387300  |
|                                                                                     | H | 3.64781600  | -0.88004500 | 1.49894900  |
|                                                                                     | C | 4.82311700  | -0.09769500 | -2.10083100 |
|                                                                                     | H | 2.76307500  | -0.24304100 | -2.69434000 |
|                                                                                     | C | 5.76933600  | -0.17405400 | -1.07133200 |
|                                                                                     | H | 5.15938500  | 0.12007700  | -3.11052500 |
|                                                                                     | H | 6.81870900  | -0.01578700 | -1.28282000 |
|                                                                                     | O | 6.14705500  | -0.56717700 | 1.33983400  |
|                                                                                     | C | 7.57104100  | -0.37267500 | 1.15839600  |
|                                                                                     | H | 7.79399000  | 0.63458800  | 0.78580400  |
|                                                                                     | H | 8.00688800  | -0.50168500 | 2.14909200  |
|                                                                                     | H | 7.99282800  | -1.11567200 | 0.47059200  |
|                                                                                     | C | 0.59419200  | -0.67386200 | -1.25321500 |
|                                                                                     | H | 0.63446100  | -1.49194200 | -1.99038800 |
|                                                                                     | H | 0.71168200  | 0.26787800  | -1.81413000 |
| <b>P9</b>                                                                           | C | -0.94715800 | 0.59001000  | 1.85650800  |
| 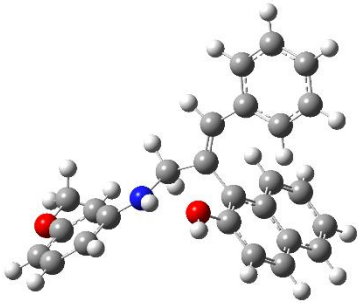 | C | -1.00606800 | 0.52424100  | 0.47197600  |
|                                                                                     | C | -1.43634700 | 1.69059600  | -0.24832700 |
|                                                                                     | C | -1.80226100 | 2.88142000  | 0.47230700  |
|                                                                                     | C | -1.73258600 | 2.87718100  | 1.89215400  |
|                                                                                     | C | -1.31371100 | 1.75564800  | 2.57243600  |
|                                                                                     | H | -1.27527400 | 0.81289700  | -2.22328900 |
|                                                                                     | C | -1.52795000 | 1.71096300  | -1.67129700 |
|                                                                                     | C | -2.22698200 | 4.03193400  | -0.25081300 |
|                                                                                     | H | -2.00966900 | 3.77448800  | 2.43688200  |
|                                                                                     | H | -1.25169600 | 1.76050900  | 3.65759700  |
|                                                                                     | C | -2.29517400 | 4.01893700  | -1.62847600 |
|                                                                                     | C | -1.94386200 | 2.84399500  | -2.34164800 |
|                                                                                     | H | -2.49775500 | 4.92438400  | 0.30646500  |
|                                                                                     | H | -2.61932100 | 4.90169100  | -2.16976700 |
|                                                                                     | H | -2.00673900 | 2.83705000  | -3.42520400 |
|                                                                                     | O | -0.49405200 | -0.54593300 | 2.54248300  |
| <b>-1209.8256</b>                                                                   |   |             |             |             |

|            |   |             |             |             |
|------------|---|-------------|-------------|-------------|
|            | H | -0.57118400 | -0.43776500 | 3.50915400  |
|            | C | -0.56444300 | -0.71023700 | -0.25469100 |
|            | C | -1.35959100 | -1.73800600 | -0.63069400 |
|            | H | -0.85113900 | -2.55388400 | -1.14464800 |
|            | C | -2.80328800 | -1.98155700 | -0.47613700 |
|            | C | -3.30669200 | -3.19892900 | -0.98851300 |
|            | C | -3.71988300 | -1.10054500 | 0.13913400  |
|            | C | -4.65992000 | -3.52740500 | -0.89306700 |
|            | H | -2.61924000 | -3.89232600 | -1.46539600 |
|            | C | -5.07414500 | -1.42943300 | 0.23294900  |
|            | H | -3.37689300 | -0.15826700 | 0.54288200  |
|            | C | -5.55291100 | -2.64124000 | -0.28026900 |
|            | H | -5.01612900 | -4.47062900 | -1.29540600 |
|            | H | -5.75935600 | -0.73448900 | 0.70873400  |
|            | H | -6.60658200 | -2.89029600 | -0.20383500 |
|            | N | 1.72634600  | -0.86770800 | 0.62829400  |
|            | H | 1.22551400  | -1.04560000 | 1.48839300  |
|            | C | 3.10195600  | -0.72989100 | 0.66789200  |
|            | C | 3.85889400  | -0.52215400 | -0.50923500 |
|            | C | 3.77633700  | -0.80177600 | 1.90896700  |
|            | C | 5.24885100  | -0.38305600 | -0.42460700 |
|            | H | 3.36028500  | -0.47992000 | -1.46753300 |
|            | C | 5.16313600  | -0.66400200 | 1.96113700  |
|            | H | 3.20351000  | -0.96283300 | 2.81744600  |
|            | C | 5.91726700  | -0.45192000 | 0.80432500  |
|            | H | 5.66639700  | -0.72142300 | 2.92182400  |
|            | H | 6.99400000  | -0.34169900 | 0.82720100  |
|            | O | 6.06681500  | -0.17314900 | -1.53741500 |
|            | C | 5.45849400  | -0.08470700 | -2.84843600 |
|            | H | 4.75111600  | 0.75178100  | -2.90708900 |
|            | H | 6.28557600  | 0.08631600  | -3.53733800 |
|            | H | 4.94352800  | -1.01578900 | -3.11591200 |
|            | C | 0.92284000  | -0.76810900 | -0.58449400 |
|            | H | 1.11241600  | -1.61656100 | -1.26216800 |
|            | H | 1.20329500  | 0.14723900  | -1.13208000 |
| <b>P10</b> | C | -1.01582600 | 0.59165600  | 1.82092200  |
|            | C | -1.08659100 | 0.52427000  | 0.43710800  |
|            | C | -1.52896500 | 1.68797600  | -0.28022900 |
|            | C | -1.89602400 | 2.87702400  | 0.44279700  |
|            | C | -1.81458500 | 2.87407700  | 1.86198600  |
|            | C | -1.38293200 | 1.75555100  | 2.53931200  |
|            | H | -1.37609400 | 0.81103000  | -2.25625700 |
|            | C | -1.63139200 | 1.70714800  | -1.70244300 |
|            | C | -2.33343800 | 4.02460200  | -0.27745400 |

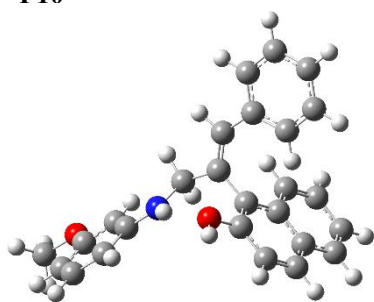

|                   |            |             |             |             |
|-------------------|------------|-------------|-------------|-------------|
| <b>-1209.8247</b> | H          | -2.09267700 | 3.77002100  | 2.40849700  |
|                   | H          | -1.31152100 | 1.76146300  | 3.62393700  |
|                   | C          | -2.41221300 | 4.01043000  | -1.65451100 |
|                   | C          | -2.05902900 | 2.83742500  | -2.36996100 |
|                   | H          | -2.60505700 | 4.91575200  | 0.28154400  |
|                   | H          | -2.74554600 | 4.89105000  | -2.19373400 |
|                   | H          | -2.12881700 | 2.82994100  | -3.45304500 |
|                   | O          | -0.54951100 | -0.54104900 | 2.50426800  |
|                   | H          | -0.62514200 | -0.43428300 | 3.47120400  |
|                   | C          | -0.64700500 | -0.70927300 | -0.29251100 |
|                   | C          | -1.44320900 | -1.73891600 | -0.66118000 |
|                   | H          | -0.93744000 | -2.55323900 | -1.18010000 |
|                   | C          | -2.88493300 | -1.98607200 | -0.49379700 |
|                   | C          | -3.39025000 | -3.20333400 | -1.00467600 |
|                   | C          | -3.79806600 | -1.10920100 | 0.13250100  |
|                   | C          | -4.74170000 | -3.53548300 | -0.89750800 |
|                   | H          | -2.70559200 | -3.89348800 | -1.49017600 |
|                   | C          | -5.15058300 | -1.44179200 | 0.23813600  |
|                   | H          | -3.45378700 | -0.16712300 | 0.53559700  |
|                   | C          | -5.63120300 | -2.65334600 | -0.27390200 |
|                   | H          | -5.09926900 | -4.47843700 | -1.29933500 |
|                   | H          | -5.83300700 | -0.74978400 | 0.72219800  |
|                   | H          | -6.68352500 | -2.90522900 | -0.18837900 |
|                   | N          | 1.65372100  | -0.85225000 | 0.56814600  |
|                   | H          | 1.16520400  | -1.02825700 | 1.43557500  |
|                   | C          | 3.02871000  | -0.71977400 | 0.58085900  |
|                   | C          | 3.76888700  | -0.52171500 | -0.59950700 |
|                   | C          | 3.72702200  | -0.78819400 | 1.81574800  |
|                   | C          | 5.16174200  | -0.38745000 | -0.54358100 |
|                   | H          | 3.29503700  | -0.47423100 | -1.57110300 |
|                   | C          | 5.10925400  | -0.65576700 | 1.84403700  |
|                   | H          | 3.16886500  | -0.94269300 | 2.73452600  |
|                   | C          | 5.85440300  | -0.45158700 | 0.67060700  |
|                   | H          | 5.62888000  | -0.70995300 | 2.79640100  |
|                   | H          | 6.93060700  | -0.35076800 | 0.72029600  |
|                   | O          | 5.77736600  | -0.19377200 | -1.78277000 |
|                   | C          | 7.21803000  | -0.04985100 | -1.82432500 |
| H                 | 7.72129200 | -0.94632400 | -1.44194800 |             |
| H                 | 7.46275600 | 0.08715000  | -2.87757000 |             |
| H                 | 7.54980300 | 0.82477300  | -1.25154900 |             |
| C                 | 0.83671300 | -0.76299700 | -0.63713000 |             |
| H                 | 1.02461400 | -1.61453300 | -1.31068600 |             |
| H                 | 1.11064100 | 0.14904300  | -1.19269900 |             |
| <b>P11</b>        | C          | -0.57813300 | 0.48162100  | 1.60963200  |

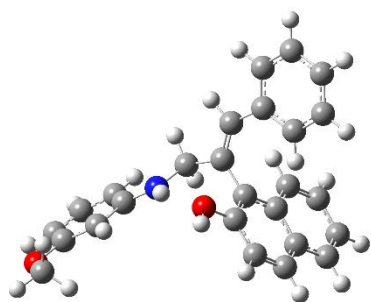

**-1209.8248**

|   |             |             |             |
|---|-------------|-------------|-------------|
| C | -0.98970800 | 0.52214500  | 0.28557800  |
| C | -1.64683400 | 1.70891500  | -0.18795000 |
| C | -1.87246200 | 2.80888900  | 0.71226600  |
| C | -1.43927300 | 2.69599300  | 2.06148900  |
| C | -0.80413800 | 1.55680000  | 2.50316000  |
| H | -1.95714900 | 1.00572100  | -2.21437800 |
| C | -2.10320100 | 1.83602000  | -1.53298500 |
| C | -2.52513800 | 3.98002700  | 0.23323500  |
| H | -1.61052800 | 3.52448700  | 2.74190000  |
| H | -0.46391800 | 1.47962100  | 3.53265400  |
| C | -2.94541100 | 4.07212700  | -1.07734100 |
| C | -2.73273900 | 2.98622900  | -1.96512200 |
| H | -2.68642300 | 4.80341100  | 0.92343500  |
| H | -3.44072800 | 4.96981800  | -1.43248500 |
| H | -3.07178200 | 3.06162500  | -2.99340800 |
| O | 0.09554400  | -0.66873500 | 2.04706600  |
| H | 0.23979600  | -0.65492000 | 3.01199700  |
| C | -0.69499400 | -0.61742900 | -0.64253000 |
| C | -1.50818300 | -1.66987600 | -0.88961000 |
| H | -1.11369100 | -2.40622200 | -1.58991600 |
| C | -2.84338300 | -2.03027900 | -0.38465000 |
| C | -3.39207700 | -3.25159600 | -0.83777500 |
| C | -3.61572100 | -1.25695200 | 0.51003800  |
| C | -4.65022200 | -3.68711200 | -0.41866600 |
| H | -2.81563200 | -3.86260300 | -1.52709500 |
| C | -4.87545600 | -1.69267100 | 0.92750000  |
| H | -3.23531800 | -0.31438600 | 0.87800500  |
| C | -5.40030700 | -2.90719700 | 0.46867100  |
| H | -5.04397800 | -4.63065200 | -0.78354100 |
| H | -5.45092100 | -1.07892100 | 1.61381200  |
| H | -6.37995100 | -3.23957500 | 0.79720100  |
| N | 1.75181800  | -0.67718700 | -0.40259700 |
| H | 1.50581000  | -0.95686100 | 0.53725800  |
| C | 3.07930800  | -0.45580800 | -0.72073800 |
| C | 4.05991800  | -0.58658000 | 0.29574400  |
| C | 3.49251200  | -0.10823700 | -2.02447400 |
| C | 5.40461800  | -0.36952500 | 0.00116800  |
| H | 3.73935500  | -0.85367400 | 1.29616400  |
| C | 4.85080500  | 0.10808500  | -2.28851100 |
| H | 2.76801000  | -0.01385000 | -2.82397100 |
| C | 5.81810100  | -0.01704600 | -1.29442300 |
| H | 5.15505700  | 0.37604100  | -3.29605200 |
| H | 6.87140000  | 0.14424700  | -1.48598900 |
| O | 6.43027200  | -0.47888500 | 0.94363600  |

|                                                                                                            |            |             |             |             |
|------------------------------------------------------------------------------------------------------------|------------|-------------|-------------|-------------|
|                                                                                                            | C          | 6.09308300  | -0.85042900 | 2.30125400  |
|                                                                                                            | H          | 5.61882200  | -1.83903800 | 2.34046500  |
|                                                                                                            | H          | 7.04229600  | -0.87802300 | 2.83618900  |
|                                                                                                            | H          | 5.42961100  | -0.11060900 | 2.76667000  |
|                                                                                                            | C          | 0.65203200  | -0.54190700 | -1.35164000 |
|                                                                                                            | H          | 0.69846100  | -1.31963100 | -2.13086500 |
|                                                                                                            | H          | 0.73416900  | 0.43000500  | -1.86542400 |
| <b>P12</b>                                                                                                 | C          | -2.02247500 | -1.66779800 | -1.61047300 |
| 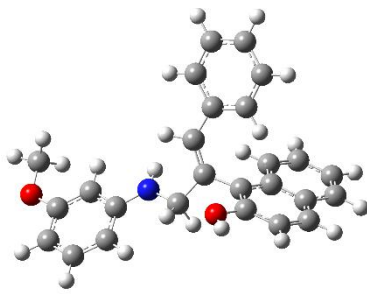 <p><b>-1209.8244</b></p> | C          | -1.67848500 | -0.96485600 | -0.46250900 |
|                                                                                                            | C          | -2.47703800 | -1.14866400 | 0.71773900  |
|                                                                                                            | C          | -3.61933200 | -2.02410000 | 0.67653100  |
|                                                                                                            | C          | -3.93112700 | -2.69664300 | -0.53660800 |
|                                                                                                            | C          | -3.14962700 | -2.52536500 | -1.65711600 |
|                                                                                                            | H          | -1.32859900 | 0.17602200  | 1.98861100  |
|                                                                                                            | C          | -2.18159800 | -0.49060500 | 1.94764200  |
|                                                                                                            | C          | -4.40772600 | -2.20046900 | 1.84875200  |
|                                                                                                            | H          | -4.79478200 | -3.35394900 | -0.56817000 |
|                                                                                                            | H          | -3.38858500 | -3.04618200 | -2.58092500 |
|                                                                                                            | C          | -4.09144900 | -1.54747200 | 3.02186700  |
|                                                                                                            | C          | -2.96570200 | -0.68571400 | 3.06705600  |
|                                                                                                            | H          | -5.26683800 | -2.86390700 | 1.80071900  |
|                                                                                                            | H          | -4.69872200 | -1.68927300 | 3.90986500  |
|                                                                                                            | H          | -2.72102200 | -0.17358400 | 3.99230100  |
|                                                                                                            | O          | -1.20896300 | -1.49879100 | -2.73266000 |
|                                                                                                            | H          | -1.54201600 | -2.00337900 | -3.49863400 |
|                                                                                                            | C          | -0.44427000 | -0.11869300 | -0.45538400 |
|                                                                                                            | C          | -0.40269400 | 1.23231300  | -0.49330400 |
|                                                                                                            | H          | 0.59576700  | 1.66666100  | -0.48644400 |
|                                                                                                            | C          | -1.47118600 | 2.24428100  | -0.55866600 |
|                                                                                                            | C          | -2.82897400 | 1.97716400  | -0.83989300 |
|                                                                                                            | C          | -1.09836800 | 3.59115300  | -0.34692700 |
|                                                                                                            | C          | -3.76639400 | 3.01162700  | -0.88955800 |
|                                                                                                            | H          | -3.14972400 | 0.96217100  | -1.03078000 |
|                                                                                                            | C          | -2.03588000 | 4.62432700  | -0.39431100 |
|                                                                                                            | H          | -0.05591700 | 3.82151900  | -0.14373600 |
|                                                                                                            | C          | -3.37903700 | 4.33834500  | -0.66410100 |
|                                                                                                            | H          | -4.80422500 | 2.78036700  | -1.10948500 |
|                                                                                                            | H          | -1.71920100 | 5.64893400  | -0.22509400 |
|                                                                                                            | H          | -4.11236900 | 5.13759500  | -0.70441300 |
|                                                                                                            | N          | 1.99123600  | -0.21370400 | 0.08745000  |
| H                                                                                                          | 1.80472800 | 0.38412500  | 0.87939700  |             |
| C                                                                                                          | 3.32338300 | -0.54670300 | -0.14712000 |             |
| C                                                                                                          | 4.32986100 | 0.19099300  | 0.52323700  |             |
| C                                                                                                          | 3.70632500 | -1.57883800 | -1.02608800 |             |

|            |   |             |             |             |
|------------|---|-------------|-------------|-------------|
|            | C | 5.67570000  | -0.09988800 | 0.30309400  |
|            | H | 4.03305800  | 0.98791900  | 1.19587000  |
|            | C | 5.06619200  | -1.84349300 | -1.23450100 |
|            | H | 2.96101500  | -2.17532100 | -1.53648100 |
|            | C | 6.06082900  | -1.11998700 | -0.58212800 |
|            | H | 5.34793300  | -2.63998300 | -1.91664400 |
|            | H | 7.11466700  | -1.31909100 | -0.73011700 |
|            | O | 6.72508100  | 0.57917600  | 0.92308000  |
|            | C | 6.41585300  | 1.64320000  | 1.85615000  |
|            | H | 5.83346800  | 1.27144700  | 2.70828400  |
|            | H | 7.38149700  | 2.00911800  | 2.20421400  |
|            | H | 5.86744000  | 2.45793200  | 1.36742100  |
|            | C | 0.84819800  | -0.94021900 | -0.44439900 |
|            | H | 0.66354200  | -1.87396900 | 0.11383700  |
|            | H | 1.06141300  | -1.23570700 | -1.47900100 |
| <b>P13</b> | C | -0.38303900 | 0.59550800  | 1.33870800  |
|            | C | -0.95388200 | 0.68519800  | 0.07464000  |
|            | C | -1.72432600 | 1.85153200  | -0.25054900 |
|            | C | -1.87115300 | 2.90673600  | 0.71782900  |
|            | C | -1.25348300 | 2.76176800  | 1.99033700  |
|            | C | -0.53292400 | 1.62936500  | 2.29822500  |
|            | H | -2.30694200 | 1.19644400  | -2.23411900 |
|            | C | -2.37486800 | 2.00277400  | -1.51182000 |
|            | C | -2.63078700 | 4.06244600  | 0.38063100  |
|            | H | -1.36213100 | 3.55601000  | 2.72287100  |
|            | H | -0.07275100 | 1.51881700  | 3.27675400  |
|            | C | -3.23361400 | 4.18175800  | -0.85487600 |
|            | C | -3.10654700 | 3.13634800  | -1.80566000 |
|            | H | -2.73094700 | 4.85158200  | 1.12090400  |
|            | H | -3.81154000 | 5.06677700  | -1.10020800 |
|            | H | -3.59724600 | 3.22724600  | -2.76968200 |
|            | O | 0.33186600  | -0.55693300 | 1.63578800  |
|            | H | 0.81099000  | -0.48691500 | 2.48297500  |
|            | C | -0.65884600 | -0.35704300 | -0.95473000 |
|            | C | -1.27483600 | -1.55156400 | -1.09351700 |
|            | H | -0.88274900 | -2.19404300 | -1.88405800 |
|            | C | -2.38681100 | -2.17323100 | -0.35618300 |
|            | C | -3.21637000 | -1.50303900 | 0.56895000  |
|            | C | -2.65268000 | -3.53746100 | -0.60923900 |
|            | C | -4.25316900 | -2.17710700 | 1.21812200  |
|            | H | -3.05576800 | -0.45342400 | 0.77498600  |
|            | C | -3.68700900 | -4.21166500 | 0.04240900  |
|            | H | -2.03105000 | -4.07022300 | -1.32395200 |
|            | C | -4.49342500 | -3.53312800 | 0.96310000  |

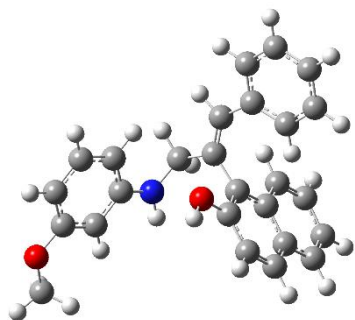

**-1209.8233**

|           |   |             |             |             |
|-----------|---|-------------|-------------|-------------|
|           | H | -4.87919900 | -1.63952300 | 1.92389900  |
|           | H | -3.86423000 | -5.26176300 | -0.16873000 |
|           | H | -5.30056900 | -4.05143200 | 1.47120500  |
|           | N | 1.70068100  | 0.49541200  | -1.35143500 |
|           | H | 1.82979800  | 1.49243400  | -1.29242400 |
|           | C | 2.70839900  | -0.30673200 | -0.82637400 |
|           | C | 3.90019300  | 0.31314800  | -0.37764900 |
|           | C | 2.59496400  | -1.70833000 | -0.74641000 |
|           | C | 4.94364500  | -0.46209100 | 0.12927000  |
|           | H | 3.98782500  | 1.39186700  | -0.44702500 |
|           | C | 3.66040600  | -2.46082700 | -0.23917000 |
|           | H | 1.67625100  | -2.19995500 | -1.03594700 |
|           | C | 4.83832300  | -1.85976600 | 0.20107600  |
|           | H | 3.55978400  | -3.54040000 | -0.17952300 |
|           | H | 5.66814600  | -2.43136700 | 0.59730300  |
|           | O | 6.14909700  | 0.07079900  | 0.59219700  |
|           | C | 6.35006200  | 1.50341600  | 0.53004100  |
|           | H | 5.61216100  | 2.03968900  | 1.13989700  |
|           | H | 7.34857600  | 1.67119700  | 0.93327900  |
|           | H | 6.30338600  | 1.87066700  | -0.50265500 |
|           | C | 0.45675100  | 0.02282600  | -1.94161600 |
|           | H | 0.66150500  | -0.83337600 | -2.59742000 |
|           | H | 0.09437900  | 0.83585200  | -2.58545500 |
| <b>M1</b> | C | -1.99818400 | 1.59949200  | -1.67038500 |
|           | C | -1.71762600 | 0.94199100  | -0.47906700 |
|           | C | -2.56932300 | 1.18369300  | 0.65277800  |
|           | C | -3.69789500 | 2.06785100  | 0.52005100  |
|           | C | -3.94363400 | 2.69141500  | -0.73370900 |
|           | C | -3.11139600 | 2.46553700  | -1.80701100 |
|           | H | -1.49806300 | -0.09658800 | 2.03220000  |
|           | C | -2.34012500 | 0.57602000  | 1.92213600  |
|           | C | -4.53905700 | 2.30145400  | 1.64462500  |
|           | H | -4.79707000 | 3.35511900  | -0.83424800 |
|           | H | -3.29959800 | 2.94935600  | -2.76216700 |
|           | C | -4.28633100 | 1.69619900  | 2.85804100  |
|           | C | -3.17409600 | 0.82636600  | 2.99350000  |
|           | H | -5.38720200 | 2.97047700  | 1.52780100  |
|           | H | -4.93339900 | 1.88161400  | 3.70914500  |
|           | H | -2.97943200 | 0.35185000  | 3.95010900  |
|           | O | -1.13521200 | 1.37502300  | -2.74536200 |
|           | H | -1.42940100 | 1.84645700  | -3.54751600 |
|           | C | -0.49697000 | 0.08219700  | -0.37754700 |
|           | C | -0.47377500 | -1.26926800 | -0.35146900 |
|           | H | 0.51606000  | -1.71643600 | -0.27560000 |

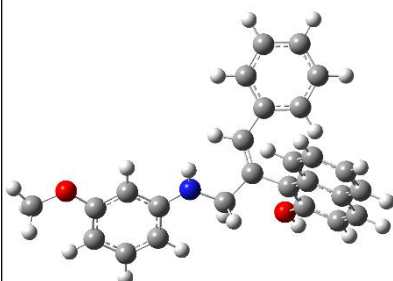

|   |             |             |             |
|---|-------------|-------------|-------------|
| C | -1.55526700 | -2.26737800 | -0.42032300 |
| C | -1.22325000 | -3.60343500 | -0.10041600 |
| C | -2.88668400 | -1.99739300 | -0.80543400 |
| C | -2.17677900 | -4.62219000 | -0.14167800 |
| H | -0.20060300 | -3.83666900 | 0.18372500  |
| C | -3.83992200 | -3.01762000 | -0.84895600 |
| H | -3.17364900 | -0.99216600 | -1.08272000 |
| C | -3.49438200 | -4.33276300 | -0.51441800 |
| H | -1.89207000 | -5.63856300 | 0.11256200  |
| H | -4.85682300 | -2.78471000 | -1.15006000 |
| H | -4.23971300 | -5.12107900 | -0.55030000 |
| N | 1.92529700  | 0.16398200  | 0.23196000  |
| H | 1.72075900  | -0.39860300 | 1.04493000  |
| C | 3.26837000  | 0.42989300  | -0.01905600 |
| C | 4.24764600  | -0.29855900 | 0.68404000  |
| C | 3.69161700  | 1.40040200  | -0.95787600 |
| C | 5.60566500  | -0.07558200 | 0.45172300  |
| H | 3.96619800  | -1.05259200 | 1.41155900  |
| C | 5.05413600  | 1.60078200  | -1.17835000 |
| H | 2.96917600  | 1.99563300  | -1.50167900 |
| C | 6.03209900  | 0.87627200  | -0.48636400 |
| H | 5.36531200  | 2.34740000  | -1.90314100 |
| H | 7.08171500  | 1.05847800  | -0.67613300 |
| O | 6.47103700  | -0.86335400 | 1.21283300  |
| C | 7.89937000  | -0.70128400 | 1.02812700  |
| H | 8.19901600  | -0.93571300 | -0.00047000 |
| H | 8.35926100  | -1.41143700 | 1.71504800  |
| H | 8.22246500  | 0.31641600  | 1.27853600  |
| C | 0.80359000  | 0.89055400  | -0.34119500 |
| H | 0.61097000  | 1.83398900  | 0.19808500  |
| H | 1.04564200  | 1.16867500  | -1.37374700 |



## Screening of Catalysts and Condition Optimization

Table S2. Screening of solvents, Hantzsch esters **3** and catalysts.<sup>a</sup>

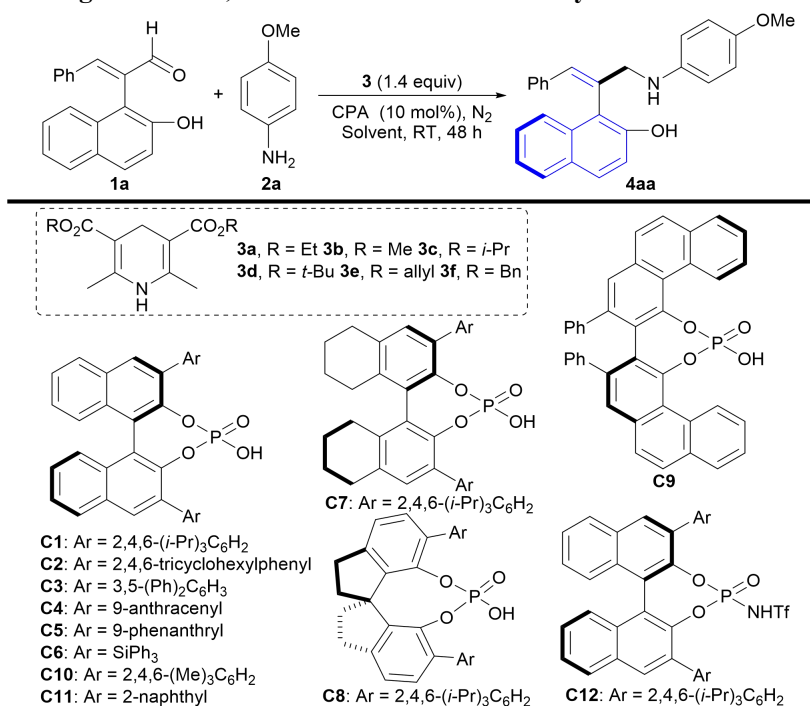

| Entry | <b>3</b>  | CPA       | Solvent                         | Yield <sup>b</sup> [%] | ee <sup>c</sup> [%] |
|-------|-----------|-----------|---------------------------------|------------------------|---------------------|
| 1     | <b>3a</b> | <b>C1</b> | DCM                             | 54                     | 40                  |
| 2     | <b>3a</b> | <b>C1</b> | Toluene                         | 68                     | 35                  |
| 3     | <b>3a</b> | <b>C1</b> | EtOAc                           | 50                     | 58                  |
| 4     | <b>3a</b> | <b>C1</b> | THF                             | 53                     | 60                  |
| 5     | <b>3a</b> | <b>C1</b> | <i>n</i> -hexane                | 42                     | 16                  |
| 6     | <b>3a</b> | <b>C1</b> | MeOH                            | 35                     | -14                 |
| 7     | <b>3a</b> | <b>C1</b> | CH <sub>3</sub> CN              | 57                     | 46                  |
| 8     | <b>3a</b> | <b>C1</b> | MTBE                            | 74                     | 71                  |
| 9     | <b>3a</b> | <b>C1</b> | <b>1,4-dioxane</b>              | <b>72</b>              | <b>74</b>           |
| 10    | <b>3a</b> | <b>C1</b> | <b>2-MeTHF</b>                  | <b>71</b>              | <b>74</b>           |
| 11    | <b>3a</b> | <b>C1</b> | CH <sub>3</sub> NO <sub>2</sub> | 59                     | 56                  |
| 12    | <b>3a</b> | <b>C1</b> | PhCF <sub>3</sub>               | 52                     | 35                  |
| 13    | <b>3a</b> | <b>C1</b> | DCE                             | 53                     | 31                  |
| 14    | <b>3a</b> | <b>C1</b> | PhOMe                           | 49                     | 34                  |
| 15    | <b>3a</b> | <b>C1</b> | CCl <sub>4</sub>                | 52                     | 32                  |
| 16    | <b>3a</b> | <b>C1</b> | <i>n</i> -Bu <sub>2</sub> O     | 40                     | 51                  |
| 17    | <b>3a</b> | <b>C2</b> | 1,4-dioxane                     | 73                     | 70                  |
| 18    | <b>3a</b> | <b>C3</b> | 1,4-dioxane                     | 46                     | 9                   |
| 19    | <b>3a</b> | <b>C4</b> | 1,4-dioxane                     | 38                     | 5                   |
| 20    | <b>3a</b> | <b>C5</b> | 1,4-dioxane                     | 49                     | 26                  |

|    |           |            |             |    |     |
|----|-----------|------------|-------------|----|-----|
| 21 | <b>3a</b> | <b>C6</b>  | 1,4-dioxane | 52 | 48  |
| 22 | <b>3a</b> | <b>C7</b>  | 1,4-dioxane | 50 | 56  |
| 23 | <b>3a</b> | <b>C8</b>  | 1,4-dioxane | 59 | 55  |
| 24 | <b>3a</b> | <b>C9</b>  | 1,4-dioxane | 37 | 10  |
| 25 | <b>3a</b> | <b>C10</b> | 1,4-dioxane | 49 | -34 |
| 26 | <b>3a</b> | <b>C11</b> | 1,4-dioxane | 42 | -24 |
| 27 | <b>3a</b> | <b>C12</b> | 1,4-dioxane | 26 | 60  |
| 28 | <b>3b</b> | <b>C1</b>  | 1,4-dioxane | 84 | 77  |
| 29 | <b>3c</b> | <b>C1</b>  | 1,4-dioxane | 62 | 65  |
| 30 | <b>3d</b> | <b>C1</b>  | 1,4-dioxane | 42 | 51  |
| 31 | <b>3e</b> | <b>C1</b>  | 1,4-dioxane | 74 | 70  |
| 32 | <b>3f</b> | <b>C1</b>  | 1,4-dioxane | 63 | 66  |

<sup>a</sup> All reactions were carried out with (*E*)-2-(2-hydroxynaphthalen-1-yl)-3-phenylacrylaldehyde **1a** (27.4 mg, 0.10 mmol), 4-methoxyaniline **2a** (13.5 mg, 0.11 mmol), Hantzsch ester **3** (0.14 mmol), catalyst CPA (10 mol%) and solvent (2.0 mL) at room temperature in a sealed tube under nitrogen atmosphere for 48 h. <sup>b</sup> Isolated yield. <sup>c</sup> Determined by chiral stationary phase HPLC analysis.

**Table S3. Screening of additive, temperatures *et al.*<sup>a</sup>**

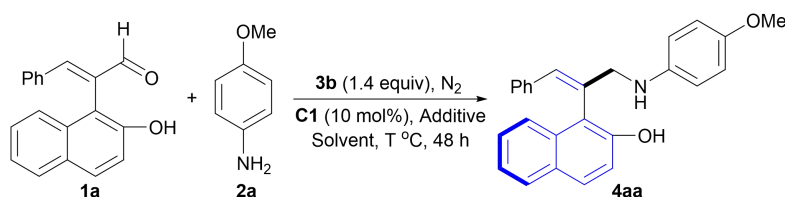

| Entry          | Solvent                             | Additive                       | T [°C] | Yield <sup>b</sup> [%] | ee <sup>c</sup> [%] |
|----------------|-------------------------------------|--------------------------------|--------|------------------------|---------------------|
| 1              | 1,4-dioxane                         | 5Å MS (100 mg)                 | RT     | 80                     | 73                  |
| 2              | 1,4-dioxane                         | MgSO <sub>4</sub> (100 mg)     | RT     | 78                     | 75                  |
| 3 <sup>d</sup> | 1,4-dioxane                         | PhCO <sub>2</sub> H (10 mol%)  | 0      | 87                     | 78                  |
| 4 <sup>d</sup> | 1,4-dioxane                         | Mg(OTf) <sub>2</sub> (10 mol%) | 0      | trace                  | -                   |
| 5 <sup>e</sup> | 1,4-dioxane/<br>2-MeTHF=1/1         | none                           | 10     | <b>80</b>              | <b>81</b>           |
| 6 <sup>d</sup> | <b>1,4-dioxane/<br/>2-MeTHF=1/1</b> | none                           | 5      | <b>77</b>              | <b>83</b>           |

<sup>a</sup> Unless otherwise stated, all reactions were carried out with (*E*)-2-(2-hydroxynaphthalen-1-yl)-3-phenylacrylaldehyde **1a** (27.4 mg, 0.10 mmol), 4-methoxyaniline **2a** (13.5 mg, 0.11 mmol), Hantzsch ester **3b** (31.5 mg, 0.14 mmol), **C1** (7.5 mg, 10 mol%) and solvent (2.0 mL) at room temperature in a sealed tube under nitrogen atmosphere for 48 h. <sup>b</sup> Isolated yield. <sup>c</sup> Determined by chiral stationary phase HPLC analysis. <sup>d</sup> The reaction was run for 4 d. <sup>e</sup> The reaction was run for 3 d.

## Preparation and Analytic Data of 1

1-Enal substituted 2-naphthols **1a-1r** were prepared in accordance with a modified method<sup>2</sup> via the following procedure.

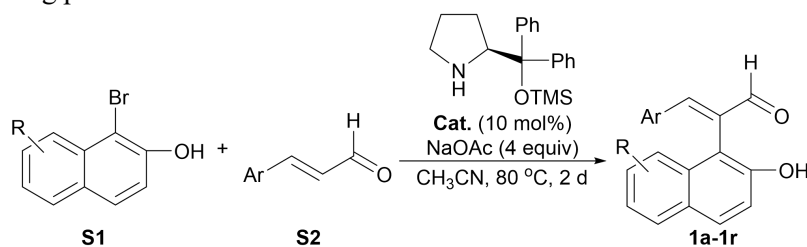

To a solution of **S1** (2.0 mmol), enal **S2** (4.0 mmol) and NaOAc (656.3 mg, 8.0 mmol) in CH<sub>3</sub>CN (15 mL) was added diphenylprolinol TMS ether **Cat.** (65.1 mg, 0.20 mmol) under N<sub>2</sub> atmosphere. Then the reaction mixture was stirred at 80 °C for 2 d. After the reaction was completed, the mixture was filtered and the filtrate was removed by vacuum distillation. The crude product was added with EtOAc (30 mL) and washed with brine (15 mL). The organic layer was dried with anhydrous Na<sub>2</sub>SO<sub>4</sub> and concentrated in vacuo. The crude product was then purified by chromatography on silica gel (petroleum ether/ethyl acetate) to give **1a-1r**.

Preparation of **1s**:

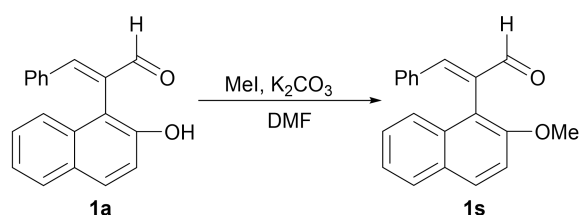

To a solution of **1a** (54.9 mg, 0.20 mmol) and methyl iodide (42.6 mg, 19.2  $\mu$ L, 0.30 mmol) in *N,N*-dimethylformamide (2.0 mL) was added K<sub>2</sub>CO<sub>3</sub> (55.3 mg, 0.40 mmol) and the mixture was stirred at room temperature for 6 h, after which the mixture was quenched with water (5 mL) and extracted with EtOAc (2  $\times$  10 mL). The combined organic layers were washed with brine and dried over anhydrous Na<sub>2</sub>SO<sub>4</sub>. After filtered and concentrated under vacuum, the crude product was purified with flash chromatography on silica gel, eluting with ethyl acetate/petroleum ether 1:10 (v/v), to afford the product **1s** (48.4 mg, 84%).

The compounds **1a-1s** were characterized in this report.

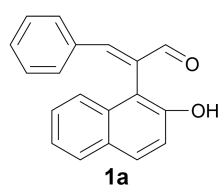

(*E*)-2-(2-Hydroxynaphthalen-1-yl)-3-phenylacrylaldehyde **1a** was obtained as a brown solid in 71% yield.  $R_f = 0.20$  (petroleum ether/ethyl acetate = 4:1); m.p. 158-159 °C;  $^1\text{H NMR}$  (400 MHz,  $\text{DMSO-}d_6$ ):  $\delta$  9.88 (s, 1H), 9.62 (s, 1H), 7.99 (s, 1H), 7.90-7.79 (m, 2H), 7.35-7.31 (m, 1H), 7.30-7.22 (m, 4H), 7.22-7.13 (m, 4H);  $^{13}\text{C NMR}$  (100 MHz,  $\text{DMSO-}d_6$ ):  $\delta$  195.1, 152.9, 152.4, 137.4, 135.0, 132.7, 130.8, 130.4, 130.1, 129.1, 128.7, 128.5, 127.0, 123.7, 123.2, 118.9, 113.8; HRMS (ESI) calcd for  $\text{C}_{19}\text{H}_{15}\text{O}_2$  ( $\text{M}+\text{H}$ ) $^+$  275.1067, found 275.1077.

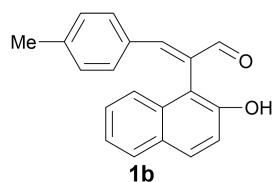

(*E*)-2-(2-Hydroxynaphthalen-1-yl)-3-(*p*-tolyl)acrylaldehyde **1b** was obtained as a yellow solid in 73% yield.  $R_f = 0.20$  (petroleum ether/ethyl acetate = 4:1); m.p. 152-153 °C;  $^1\text{H NMR}$  (400 MHz,  $\text{CDCl}_3$ ):  $\delta$  9.88 (s, 1H), 7.87 (s, 1H), 7.84-7.80 (m, 2H), 7.46-7.41 (m, 1H), 7.36-7.30 (m, 2H), 7.18 (d,  $J = 8.8$  Hz, 1H), 7.07 (d,  $J = 8.4$  Hz, 2H), 6.96 (d,  $J = 8.0$  Hz, 2H), 5.28 (br., s, 1H), 2.24 (s, 3H);  $^{13}\text{C NMR}$  (100 MHz,  $\text{CDCl}_3$ ):  $\delta$  194.1, 153.5, 150.6, 142.1, 133.8, 132.1, 130.8, 130.8, 130.7, 129.7, 129.3, 128.5, 127.1, 123.9, 123.8, 118.1, 113.4, 21.5; HRMS (ESI) calcd for  $\text{C}_{20}\text{H}_{17}\text{O}_2$  ( $\text{M}+\text{H}$ ) $^+$  289.1223, found 289.1225.

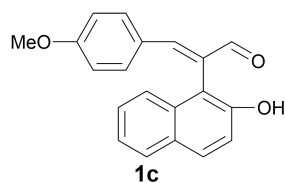

(*E*)-2-(2-Hydroxynaphthalen-1-yl)-3-(4-methoxyphenyl)acrylaldehyde **1c** was obtained as a yellow solid in 69% yield.  $R_f = 0.15$  (petroleum ether/ethyl acetate = 4:1); m.p. 183-184 °C;  $^1\text{H NMR}$  (400 MHz,  $\text{DMSO-}d_6$ ):  $\delta$  9.81 (s, 1H), 9.55 (s, 1H), 7.91 (s, 1H), 7.89-7.79 (m, 2H), 7.35-7.22 (m, 4H), 7.14 (d,  $J = 8.8$  Hz, 2H), 6.75 (d,  $J = 8.8$  Hz, 2H), 3.66 (s, 3H);  $^{13}\text{C NMR}$  (100 MHz,  $\text{DMSO-}d_6$ ):  $\delta$  194.8, 161.5, 152.9, 152.3, 135.0, 132.8, 132.5, 130.0, 128.7, 128.5, 127.7, 127.0, 123.8, 123.2, 118.9, 114.7, 114.1, 55.7; HRMS (ESI) calcd for  $\text{C}_{20}\text{H}_{17}\text{O}_3$  ( $\text{M}+\text{H}$ ) $^+$  305.1172, found 305.1180.

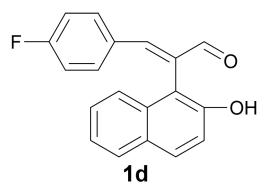

(*E*)-3-(4-Fluorophenyl)-2-(2-hydroxynaphthalen-1-yl)acrylaldehyde **1d** was obtained as a yellow solid in 65% yield.  $R_f = 0.20$  (petroleum ether/ethyl acetate = 4:1); m.p. 169-170 °C;  $^1\text{H NMR}$  (400 MHz,  $\text{DMSO-}d_6$ ):  $\delta$  10.09 (s, 1H), 9.87 (s, 1H), 8.22 (s, 1H), 8.12-8.03 (m, 2H),

7.57-7.43 (m, 6H), 7.31-7.23 (m, 2H);  $^{13}\text{C}$  NMR (100 MHz, DMSO- $d_6$ ):  $\delta$  194.9, 163.4 (d,  $^1J_{\text{C-F}} = 248.4$  Hz), 152.9, 151.0, 137.1, 137.1, 132.7 (d,  $^3J_{\text{C-F}} = 9.1$  Hz), 131.7 (d,  $^4J_{\text{C-F}} = 3.1$  Hz), 130.2, 128.8, 128.5, 127.1, 123.6, 123.3, 118.9, 116.2 (d,  $^2J_{\text{C-F}} = 21.6$  Hz), 113.5;  $^{19}\text{F}$  NMR (376 MHz, DMSO- $d_6$ )  $\delta$  -109.24; HRMS (ESI) calcd for  $\text{C}_{19}\text{H}_{14}\text{FO}_2$  (M+H) $^+$  293.0972, found 293.0989.

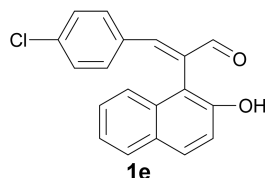

(*E*)-3-(4-Chlorophenyl)-2-(2-hydroxynaphthalen-1-yl)acrylaldehyde **1e** was obtained as a yellow solid in 70% yield.  $R_f = 0.20$  (petroleum ether/ethyl acetate = 4:1); m.p. 188-189 °C;  $^1\text{H}$  NMR (400 MHz, DMSO- $d_6$ ):  $\delta$  9.88 (s, 1H), 9.67 (s, 1H), 8.00 (s, 1H), 7.90-7.81 (m, 2H), 7.33-7.23 (m, 6H), 7.22-7.17 (m, 2H);  $^{13}\text{C}$  NMR (100 MHz, DMSO- $d_6$ ):  $\delta$  194.9, 152.9, 150.7, 137.9, 135.4, 133.9, 132.6, 131.9, 130.3, 129.2, 128.8, 128.5, 127.1, 123.6, 123.3, 118.8, 113.3; HRMS (ESI) calcd for  $\text{C}_{19}\text{H}_{14}\text{ClO}_2$  (M+H) $^+$  309.0677, found 309.0661.

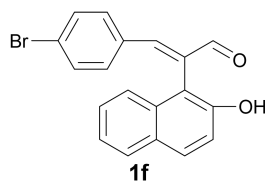

(*E*)-3-(4-Bromophenyl)-2-(2-hydroxynaphthalen-1-yl)acrylaldehyde **1f** was obtained as a yellow solid in 67% yield.  $R_f = 0.20$  (petroleum ether/ethyl acetate = 4:1); m.p. 183-184 °C;  $^1\text{H}$  NMR (400 MHz, DMSO- $d_6$ ):  $\delta$  9.88 (s, 1H), 9.69 (s, 1H), 7.98 (s, 1H), 7.92-7.79 (m, 2H), 7.40 (d,  $J = 8.0$  Hz, 2H), 7.34-7.22 (m, 4H), 7.13 (d,  $J = 8.4$  Hz, 2H);  $^{13}\text{C}$  NMR (100 MHz, DMSO- $d_6$ ):  $\delta$  194.9, 152.9, 150.8, 138.0, 134.3, 132.6, 132.1, 132.0, 130.3, 128.8, 128.5, 127.1, 124.3, 123.6, 123.3, 118.8, 113.3; HRMS (ESI) calcd for  $\text{C}_{19}\text{H}_{14}\text{BrO}_2$  (M+H) $^+$  353.0172, found 353.0164.

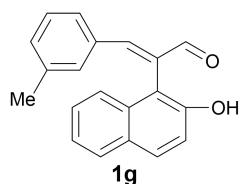

(*E*)-2-(2-Hydroxynaphthalen-1-yl)-3-(*m*-tolyl)acrylaldehyde **1g** was obtained as a yellow solid in 72% yield.  $R_f = 0.20$  (petroleum ether/ethyl acetate = 4:1); m.p. 141-142 °C;  $^1\text{H}$  NMR (400 MHz,  $\text{CDCl}_3$ ):  $\delta$  9.76 (s, 1H), 7.82-7.68 (m, 3H), 7.43-7.36 (m, 1H), 7.33-7.26 (m, 2H), 7.09 (d,  $J = 8.8$  Hz, 1H), 7.04 (d,  $J = 7.2$  Hz, 1H), 6.98-6.91 (m, 2H), 6.89-6.81 (m, 1H), 6.06 (br., s, 1H), 2.10 (s, 3H);  $^{13}\text{C}$  NMR (100 MHz,  $\text{CDCl}_3$ ):  $\delta$  194.9, 154.1, 150.9, 138.3, 135.0,

133.6, 132.2, 132.0, 131.9, 130.6, 129.2, 128.7, 128.5, 127.4, 127.0, 123.8, 123.7, 118.2, 113.3, 21.2; HRMS (ESI) calcd for C<sub>20</sub>H<sub>17</sub>O<sub>2</sub> (M+H)<sup>+</sup> 289.1223, found 289.1232.

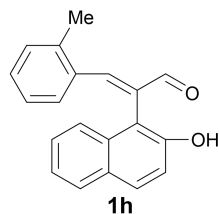

(*E*)-2-(2-Hydroxynaphthalen-1-yl)-3-(*o*-tolyl)acrylaldehyde **1h** was obtained as a yellow solid in 61% yield.  $R_f = 0.20$  (petroleum ether/ethyl acetate = 4:1); m.p. 52-53 °C; <sup>1</sup>H NMR (400 MHz, CDCl<sub>3</sub>): δ 9.90 (s, 1H), 8.14 (s, 1H), 7.79-7.72 (m, 2H), 7.42-7.38 (m, 1H), 7.35-7.26 (m, 2H), 7.16 (d,  $J = 7.6$  Hz, 1H), 7.12-7.06 (m, 2H), 6.85 (d,  $J = 7.6$  Hz, 1H), 6.74-6.67 (m, 1H), 5.61 (br., s, 1H), 2.53 (s, 3H); <sup>13</sup>C NMR (100 MHz, CDCl<sub>3</sub>): δ 194.5, 150.9, 150.9, 138.3, 135.8, 132.5, 132.3, 130.7, 130.6, 130.6, 129.2, 128.5, 128.5, 127.0, 126.2, 123.8, 123.7, 118.1, 113.4, 20.2; HRMS (ESI) calcd for C<sub>20</sub>H<sub>17</sub>O<sub>2</sub> (M+H)<sup>+</sup> 289.1223, found 289.1216.

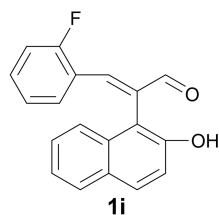

(*E*)-3-(2-Fluorophenyl)-2-(2-hydroxynaphthalen-1-yl)acrylaldehyde **1i** was obtained as a yellow solid in 64% yield.  $R_f = 0.20$  (petroleum ether/ethyl acetate = 4:1); m.p. 57-58 °C; <sup>1</sup>H NMR (400 MHz, CDCl<sub>3</sub>): δ 9.92 (s, 1H), 8.19 (s, 1H), 7.82-7.73 (m, 2H), 7.43-7.38 (m, 1H), 7.36-7.29 (m, 2H), 7.24-7.19 (m, 1H), 7.12 (d,  $J = 8.8$  Hz, 1H), 7.09-7.03 (m, 1H), 6.84-6.76 (m, 1H), 6.66 (t,  $J = 7.6$  Hz, 1H), 5.62 (br., s, 1H); <sup>13</sup>C NMR (100 MHz, CDCl<sub>3</sub>): δ 194.3, 161.3 (d, <sup>1</sup> $J_{C-F} = 252.6$  Hz), 150.8, 144.0 (d, <sup>3</sup> $J_{C-F} = 6.8$  Hz), 136.6, 132.9 (d, <sup>3</sup> $J_{C-F} = 9.0$  Hz), 131.9, 130.8, 129.3, 129.2, 128.5, 127.2, 124.4 (d, <sup>4</sup> $J_{C-F} = 3.6$  Hz), 123.8, 123.6, 121.9 (d, <sup>2</sup> $J_{C-F} = 10.4$  Hz), 118.1, 115.7 (d, <sup>2</sup> $J_{C-F} = 21.9$  Hz), 112.9; <sup>19</sup>F NMR (376 MHz, DMSO-*d*<sub>6</sub>) δ -114.70; HRMS (ESI) calcd for C<sub>19</sub>H<sub>14</sub>FO<sub>2</sub> (M+H)<sup>+</sup> 293.0972, found 293.0976.

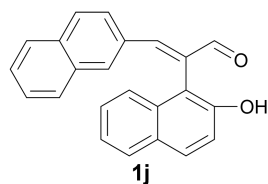

(*E*)-2-(2-Hydroxynaphthalen-1-yl)-3-(naphthalen-2-yl)acrylaldehyde **1j** was obtained as a yellow solid in 73% yield.  $R_f = 0.20$  (petroleum ether/ethyl acetate = 4:1); m.p. 55-56 °C; <sup>1</sup>H NMR (400 MHz, CDCl<sub>3</sub>): δ 10.12 (s, 1H), 8.21 (s, 1H), 8.06-7.99 (m, 3H), 7.90-7.82 (m, 2H),

7.70-7.60 (m, 4H), 7.56-7.50 (m, 2H), 7.39 (d,  $J = 9.2$  Hz, 1H), 7.27 (dd,  $J = 8.8, 2.0$  Hz, 1H), 6.03 (br., s, 1H);  $^{13}\text{C}$  NMR (100 MHz,  $\text{CDCl}_3$ ):  $\delta$  194.4, 153.4, 151.0, 135.1, 134.3, 132.9, 132.8, 132.3, 131.4, 130.8, 129.3, 129.0, 128.5, 128.5, 128.0, 127.6, 127.2, 126.6, 125.8, 123.9, 123.8, 118.2, 113.4; HRMS (ESI) calcd for  $\text{C}_{23}\text{H}_{17}\text{O}_2$  ( $\text{M}+\text{H}$ ) $^+$  325.1223, found 325.1220.

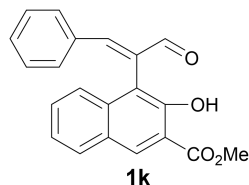

Methyl (*E*)-3-hydroxy-4-(3-oxo-1-phenylprop-1-en-2-yl)-2-naphthoate **1k** was obtained as a yellow solid in 58% yield.  $R_f = 0.15$  (petroleum ether/ethyl acetate = 4:1); m.p. 210-211 °C;  $^1\text{H}$  NMR (400 MHz,  $\text{DMSO}-d_6$ ):  $\delta$  10.41 (s, 1H), 9.91 (s, 1H), 8.70 (s, 1H), 8.19-8.00 (m, 2H), 7.52-7.34 (m, 3H), 7.33-7.06 (m, 5H), 4.00 (s, 3H);  $^{13}\text{C}$  NMR (100 MHz,  $\text{DMSO}-d_6$ ):  $\delta$  194.7, 169.9, 153.0, 152.9, 136.3, 135.3, 134.7, 133.3, 131.0, 130.6, 130.4, 130.4, 129.3, 127.2, 124.7, 123.7, 116.3, 115.1, 53.5; HRMS (ESI) calcd for  $\text{C}_{21}\text{H}_{15}\text{O}_4$  ( $\text{M}-\text{H}$ ) $^-$  331.0976, found 331.0975.

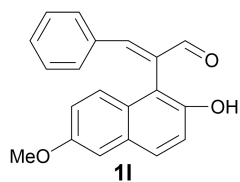

(*E*)-2-(2-Hydroxy-6-methoxynaphthalen-1-yl)-3-phenylacrylaldehyde **1l** was obtained as a yellow solid in 66% yield.  $R_f = 0.15$  (petroleum ether/ethyl acetate = 4:1); m.p. 133-134 °C;  $^1\text{H}$  NMR (400 MHz,  $\text{DMSO}-d_6$ ):  $\delta$  9.87 (s, 1H), 9.56 (s, 1H), 7.98 (s, 1H), 7.79-7.72 (m, 2H), 7.28-7.21 (m, 3H), 7.21-7.16 (m, 2H), 7.08 (d,  $J = 8.8$  Hz, 1H), 6.92 (dd,  $J = 8.8, 2.4$  Hz, 1H), 6.62 (d,  $J = 2.4$  Hz, 1H), 3.59 (s, 3H);  $^{13}\text{C}$  NMR (100 MHz,  $\text{DMSO}-d_6$ ):  $\delta$  195.0, 158.4, 153.6, 152.0, 137.6, 135.1, 134.0, 130.7, 130.4, 130.3, 129.9, 129.0, 123.8, 116.2, 115.0, 113.0, 103.0, 55.3; HRMS (ESI) calcd for  $\text{C}_{20}\text{H}_{17}\text{O}_3$  ( $\text{M}+\text{H}$ ) $^+$  305.1172, found 305.1174.

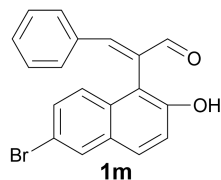

(*E*)-2-(6-Bromo-2-hydroxynaphthalen-1-yl)-3-phenylacrylaldehyde **1m** was obtained as a yellow solid in 70% yield.  $R_f = 0.20$  (petroleum ether/ethyl acetate = 4:1); m.p. 187-188 °C;  $^1\text{H}$  NMR (400 MHz,  $\text{DMSO}-d_6$ ):  $\delta$  9.88 (s, 1H), 9.83 (s, 1H), 8.12 (d,  $J = 2.4$  Hz, 1H), 8.01 (s, 1H), 7.87 (d,  $J = 9.2$  Hz, 1H), 7.40 (dd,  $J = 8.8, 2.4$  Hz, 1H), 7.34-7.23 (m, 3H), 7.22-7.13 (m,

4H);  $^{13}\text{C}$  NMR (100 MHz,  $\text{DMSO-}d_6$ ):  $\delta$  194.9, 153.5, 152.6, 136.8, 134.9, 131.4, 130.9, 130.5, 130.4, 129.9, 129.7, 129.4, 129.1, 126.1, 120.1, 116.1, 114.2; HRMS (ESI) calcd for  $\text{C}_{19}\text{H}_{12}\text{BrO}_2$  ( $\text{M-H}^-$ ) 351.0026, found 351.0025.

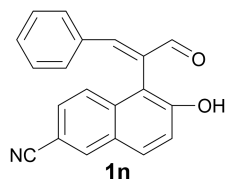

(*E*)-6-Hydroxy-5-(3-oxo-1-phenylprop-1-en-2-yl)-2-naphthonitrile **1n** was obtained as a yellow solid in 62% yield.  $R_f$  = 0.20 (petroleum ether/ethyl acetate = 3:1); m.p. 219-220 °C;  $^1\text{H}$  NMR (400 MHz,  $\text{DMSO-}d_6$ ):  $\delta$  10.57 (br., s, 1H), 9.90 (s, 1H), 8.48 (s, 1H), 8.12-7.93 (m, 2H), 7.60-7.50 (m, 1H), 7.49-7.40 (m, 2H), 7.32-7.24 (m, 1H), 7.24-7.08 (m, 4H);  $^{13}\text{C}$  NMR (100 MHz,  $\text{DMSO-}d_6$ ):  $\delta$  194.8, 156.4, 152.8, 136.5, 135.1, 134.8, 134.6, 131.1, 131.0, 130.4, 129.2, 127.5, 127.2, 125.0, 120.8, 120.0, 114.4, 105.2; HRMS (ESI) calcd for  $\text{C}_{20}\text{H}_{12}\text{NO}_2$  ( $\text{M-H}^-$ ) 298.0874, found 298.0873.

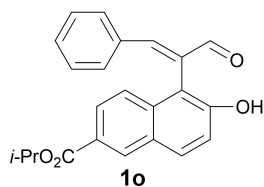

Isopropyl (*E*)-6-hydroxy-5-(3-oxo-1-phenylprop-1-en-2-yl)-2-naphthoate **1o** was obtained as a brown solid in 60% yield.  $R_f$  = 0.15 (petroleum ether/ethyl acetate = 4:1); m.p. 82-83 °C;  $^1\text{H}$  NMR (400 MHz,  $\text{DMSO-}d_6$ ):  $\delta$  10.11 (s, 1H), 9.91 (s, 1H), 8.56 (d,  $J$  = 1.6 Hz, 1H), 8.11 (d,  $J$  = 8.8 Hz, 1H), 8.04 (s, 1H), 7.78 (dd,  $J$  = 8.8, 1.6 Hz, 1H), 7.43 (d,  $J$  = 8.0 Hz, 1H), 7.38 (d,  $J$  = 8.8 Hz, 1H), 7.29-7.23 (m, 1H), 7.22-7.13 (m, 4H), 5.24-5.11 (m, 1H), 1.34 (d,  $J$  = 6.0 Hz, 6H);  $^{13}\text{C}$  NMR (100 MHz,  $\text{DMSO-}d_6$ ):  $\delta$  194.8, 165.9, 155.3, 152.6, 136.9, 135.2, 134.9, 131.9, 131.4, 130.9, 130.4, 129.1, 127.4, 126.1, 125.0, 124.1, 119.8, 114.2, 68.3, 22.2; HRMS (ESI) calcd for  $\text{C}_{23}\text{H}_{19}\text{O}_4$  ( $\text{M-H}^-$ ) 359.1289, found 359.1288.

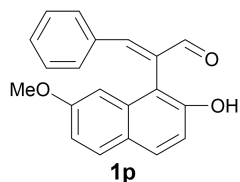

(*E*)-2-(2-Hydroxy-7-methoxynaphthalen-1-yl)-3-phenylacrylaldehyde **1p** was obtained as a yellow solid in 69% yield.  $R_f$  = 0.15 (petroleum ether/ethyl acetate = 4:1); m.p. 132-133 °C;  $^1\text{H}$  NMR (400 MHz,  $\text{DMSO-}d_6$ ):  $\delta$  9.88 (s, 1H), 9.56 (s, 1H), 7.98 (s, 1H), 7.79-7.71 (m, 2H), 7.28-7.21 (m, 3H), 7.21-7.14 (m, 2H), 7.09 (d,  $J$  = 8.8 Hz, 1H), 6.93 (dd,  $J$  = 8.8, 2.4 Hz, 1H), 6.63 (d,  $J$  = 2.4 Hz, 1H), 3.59 (s, 3H);  $^{13}\text{C}$  NMR (100 MHz,  $\text{DMSO-}d_6$ ):  $\delta$  195.0, 158.4, 153.6,



152.0, 137.6, 135.2, 134.0, 130.7, 130.4, 130.3, 129.9, 129.0, 123.8, 116.2, 115.0, 113.0, 103.0, 55.3; HRMS (ESI) calcd for C<sub>20</sub>H<sub>17</sub>O<sub>3</sub> (M+H)<sup>+</sup> 305.1172, found 305.1173.

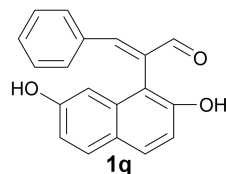

(*E*)-2-(2,7-Dihydroxynaphthalen-1-yl)-3-phenylacrylaldehyde **1q** was obtained as a yellow solid in 51% yield. R<sub>f</sub> = 0.15 (petroleum ether/ethyl acetate = 3:1); m.p. 110-111 °C; <sup>1</sup>H NMR (400 MHz, DMSO-*d*<sub>6</sub>): δ 9.86 (s, 1H), 9.45 (s, 1H), 9.41 (s, 1H), 7.95 (s, 1H), 7.72-7.65 (m, 2H), 7.29-7.16 (m, 5H), 7.00 (d, *J* = 8.8 Hz, 1H), 6.83 (dd, *J* = 8.8, 2.4 Hz, 1H), 6.59 (d, *J* = 2.4 Hz, 1H); <sup>13</sup>C NMR (100 MHz, DMSO-*d*<sub>6</sub>): δ 195.2, 156.5, 153.1, 152.0, 137.9, 135.1, 134.5, 130.8, 130.5, 130.3, 129.9, 129.1, 123.1, 115.7, 115.4, 112.2, 105.4; HRMS (ESI) calcd for C<sub>19</sub>H<sub>15</sub>O<sub>3</sub> (M+H)<sup>+</sup> 291.1016, found 291.1012.

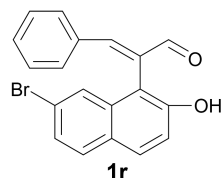

(*E*)-2-(7-Bromo-2-hydroxynaphthalen-1-yl)-3-phenylacrylaldehyde **1r** was obtained as a yellow solid in 70% yield. R<sub>f</sub> = 0.20 (petroleum ether/ethyl acetate = 4:1); m.p. 166-167 °C; <sup>1</sup>H NMR (400 MHz, DMSO-*d*<sub>6</sub>): δ 9.90 (s, 1H), 9.88 (s, 1H), 8.02 (s, 1H), 7.90 (d, *J* = 8.8 Hz, 1H), 7.83 (d, *J* = 8.8 Hz, 1H), 7.48 (d, *J* = 2.0 Hz, 1H), 7.38 (d, *J* = 8.8, 2.0 Hz, 1H), 7.33-7.25 (m, 2H), 7.24-7.15 (m, 4H); <sup>13</sup>C NMR (100 MHz, DMSO-*d*<sub>6</sub>): δ 195.0, 154.0, 152.9, 136.6, 134.8, 134.2, 131.1, 131.0, 130.4, 130.3, 129.2, 127.0, 126.2, 125.4, 120.9, 119.5, 113.2; HRMS (ESI) calcd for C<sub>19</sub>H<sub>12</sub>BrO<sub>2</sub> (M-H)<sup>-</sup> 351.0026, found 351.0025.

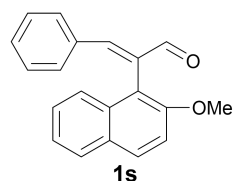

(*E*)-2-(2-Methoxynaphthalen-1-yl)-3-phenylacrylaldehyde **1s** was obtained as a yellow solid in 84% yield. R<sub>f</sub> = 0.50 (petroleum ether/ethyl acetate = 5:1); m.p. 129-130 °C; <sup>1</sup>H NMR (400 MHz, CDCl<sub>3</sub>): δ 9.89 (s, 1H), 7.93 (d, *J* = 9.2 Hz, 1H), 7.84-7.78 (m, 1H), 7.76 (s, 1H), 7.49-7.42 (m, 1H), 7.36 (d, *J* = 8.8 Hz, 1H), 7.33-7.26 (m, 2H), 7.22-7.16 (m, 1H), 7.15-7.05 (m, 4H), 3.79 (s, 3H); <sup>13</sup>C NMR (100 MHz, CDCl<sub>3</sub>): δ 194.1, 154.4, 151.3, 136.8, 134.4, 132.0, 130.5, 130.4, 130.4, 129.3, 128.6, 128.4, 127.1, 123.9, 123.9, 116.8, 113.6, 56.7; HRMS (ESI) calcd for C<sub>20</sub>H<sub>16</sub>NaO<sub>2</sub> (M+Na)<sup>+</sup> 311.1043, found 311.1042.

## General Procedure for the Catalytic Asymmetric Synthesis of Axially Chiral Styrene-Type Allylamines

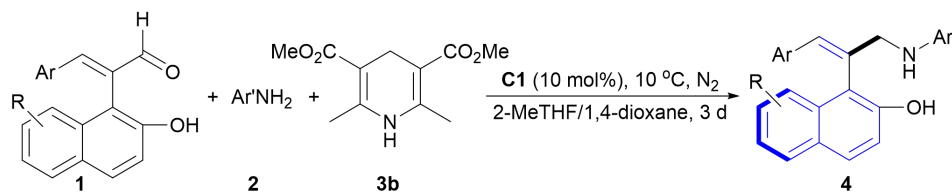

To a flame dried sealed tube equipped with a magnetic stirring bar were added chiral phosphoric acid **C1** (7.5 mg, 0.010 mmol), 1-enal substituted 2-naphthols **1** (0.10 mmol), Hantzsch ester **3b** (31.5 mg, 0.14 mmol), 1,4-dioxane (1.0 mL), 2-methyltetrahydrofuran (1.0 mL) and aromatic amines **2** (0.11 mmol) successively. The resulting mixture was stirred at 10 °C under nitrogen atmosphere for 3 d, and directly charged onto silica gel. Products **4** were isolated using petroleum ether/ethyl acetate (10:1 to 3:1) as eluent.

### Procedure for Scale-up Experiment and Tosylation of Product **4ae**

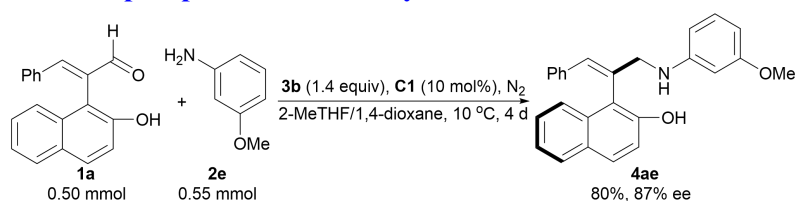

To a flame dried sealed tube equipped with a magnetic stirring bar were added (*E*)-2-(2-hydroxynaphthalen-1-yl)-3-phenylacrylaldehyde **1a** (137.1 mg, 0.50 mmol), Hantzsch ester **3b** (157.5 mg, 0.70 mmol), chiral phosphoric acid **C1** (37.5 mg, 0.050 mmol), 1,4-dioxane (3.0 mL), 2-methyltetrahydrofuran (3.0 mL) and 3-methoxyaniline **2e** (67.5 mg, 0.55 mmol) successively. The resulting mixture was stirred at 10 °C under nitrogen atmosphere for 4 d, and directly charged onto silica gel. Product **4ae** (152.5 mg, 80% yield, 87% ee) was isolated using petroleum ether/ethyl acetate (10:1 to 3:1) as eluent.

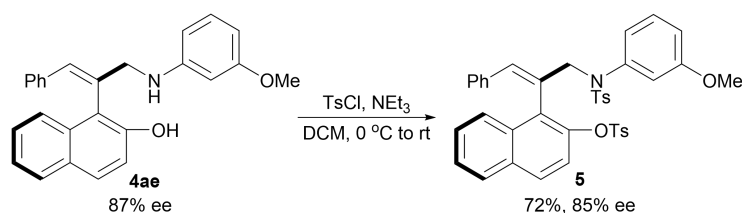

To a solution of **4ae** (38.1 mg, 0.10 mmol, 87% ee) and 4-toluene sulfonyl chloride (47.5 mg, 0.25 mmol) in DCM (2.0 mL) was added NEt<sub>3</sub> (30.5 mg, 42.0 uL, 0.30 mmol) and DMAP (1.2 mg, 0.010 mmol) at 0 °C, then the mixture was allowed to warm to room temperature and stirred for 12 h, after which the mixture was filtered and the solvent was removed in vacuo. The residue was purified with flash chromatography on silica gel, eluting with ethyl acetate/petroleum ether 1:10 (v/v), to afford the product **5** (49.6 mg, 72%, 85% ee).

## Procedure for the Control Experiment

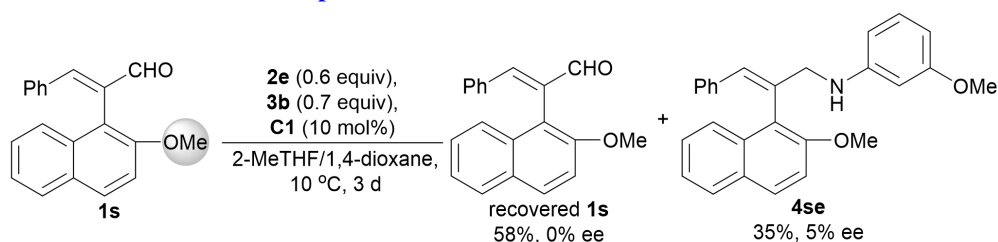

To a flame dried sealed tube equipped with a magnetic stirring bar were added chiral phosphoric acid **C1** (7.5 mg, 0.010 mmol), **1s** (28.8 mg, 0.10 mmol), Hantzsch ester **3b** (15.8 mg, 0.070 mmol), 1,4-dioxane (1.0 mL), 2-methyltetrahydrofuran (1.0 mL) and 3-methoxyaniline **2e** (7.4 mg, 0.060 mmol). The resulting mixture was stirred at 10 °C for 3 d, and directly charged onto silica gel. Product **4se** (13.8 mg, 35%, 5% ee) and recovered **1s** (16.7 mg, 58%, 0% ee) were isolated using petroleum ether/ethyl acetate (10:1 to 5:1) as eluent respectively.

## Analytic Data for the Products

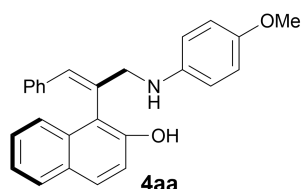

(*E*)-1-(3-((4-Methoxyphenyl)amino)-1-phenylprop-1-en-2-yl)naphthalen-2-ol **4aa** was obtained as a yellowish oil in 80% yield (30.5 mg) and 81% ee.  $R_f = 0.30$  (petroleum ether/ethyl acetate = 4:1). The ee value was determined by chiral stationary phase HPLC analysis [Daicel Chiralpak IC, isopropanol/hexane (15:85), 1.0 mL/min,  $\lambda = 254$  nm,  $t_r$  (major) = 6.94 min,  $t_r$  (minor) = 7.56 min].  $[\alpha]_D^{25} = -15.4$  ( $c = 1.00$ , EtOAc);  $^1\text{H NMR}$  (400 MHz,  $\text{CDCl}_3$ ):  $\delta$  7.78-7.70 (m, 2H), 7.67 (d,  $J = 8.0$  Hz, 1H), 7.33-7.24 (m, 2H), 7.20-7.15 (m, 1H), 7.07 (s, 1H), 7.01-6.94 (m, 3H), 6.93-6.88 (m, 2H), 6.78-6.73 (m, 2H), 6.72-6.67 (m, 2H), 4.16 (d,  $J = 14.4$  Hz, 1H), 3.95 (d,  $J = 14.4$  Hz, 1H), 3.70 (s, 3H);  $^{13}\text{C NMR}$  (100 MHz,  $\text{CDCl}_3$ ):  $\delta$  153.6, 151.4, 141.0, 135.7, 133.7, 132.9, 131.7, 129.8, 129.3, 128.5, 128.5, 128.3, 127.7, 126.8, 124.0, 123.4, 118.8, 118.7, 116.7, 115.0, 55.7, 54.8; HRMS (ESI) calcd for  $\text{C}_{26}\text{H}_{24}\text{NO}_2$  ( $\text{M}+\text{H}$ ) $^+$  382.1802, found 382.1806.

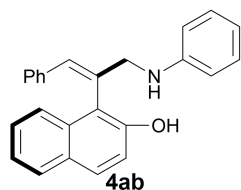

(*E*)-1-(1-Phenyl-3-(phenylamino)prop-1-en-2-yl)naphthalen-2-ol **4ab** was obtained as a yellowish oil in 78% yield (27.4 mg) and 87% ee.  $R_f = 0.30$  (petroleum ether/ethyl acetate =

4:1). The ee value was determined by chiral stationary phase HPLC analysis [Daicel Chiralpak AD-H, isopropanol/hexane (15:85), 1.0 mL/min,  $\lambda = 254$  nm,  $t_r$  (major) = 11.35 min,  $t_r$  (minor) = 15.05 min].  $[\alpha]_D^{25} = -8.30$  ( $c = 1.00$ , EtOAc);  $^1\text{H NMR}$  (400 MHz,  $\text{CDCl}_3$ ):  $\delta$  7.88-7.66 (m, 3H), 7.45-7.29 (m, 2H), 7.28-7.11 (m, 5H), 7.08-6.89 (m, 4H), 6.85-6.65 (m, 3H), 4.25 (d,  $J = 15.6$  Hz, 1H), 4.08 (d,  $J = 15.6$  Hz, 1H);  $^{13}\text{C NMR}$  (100 MHz,  $\text{CDCl}_3$ ):  $\delta$  150.6, 147.2, 135.4, 133.3, 132.4, 131.9, 129.8, 129.5, 129.3, 128.5, 128.4, 128.3, 127.8, 126.9, 123.9, 123.5, 119.0, 118.2, 115.3, 114.2, 52.6; HRMS (ESI) calcd for  $\text{C}_{25}\text{H}_{22}\text{NO}$  ( $\text{M}+\text{H}$ ) $^+$  352.1696, found 352.1690.

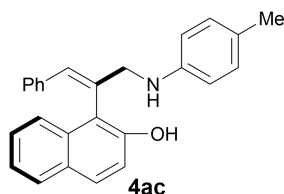

(*E*)-1-(1-Phenyl-3-(*p*-tolylamino)prop-1-en-2-yl)naphthalen-2-ol **4ac** was obtained as a yellowish oil in 71% yield (25.9 mg) and 86% ee.  $R_f = 0.30$  (petroleum ether/ethyl acetate = 4:1). The ee value was determined by chiral stationary phase HPLC analysis [Daicel Chiralpak AD-H, isopropanol/hexane (15:85), 1.0 mL/min,  $\lambda = 254$  nm,  $t_r$  (major) = 11.64 min,  $t_r$  (minor) = 14.59 min].  $[\alpha]_D^{25} = -17.0$  ( $c = 1.00$ , EtOAc);  $^1\text{H NMR}$  (400 MHz,  $\text{CDCl}_3$ ):  $\delta$  7.85-7.65 (m, 3H), 7.40-7.26 (m, 2H), 7.18 (d,  $J = 8.8$  Hz, 1H), 7.14 (s, 1H), 7.06-6.88 (m, 7H), 6.68 (d,  $J = 7.6$  Hz, 2H), 4.22 (d,  $J = 15.2$  Hz, 1H), 4.03 (d,  $J = 14.8$  Hz, 1H), 2.24 (s, 3H);  $^{13}\text{C NMR}$  (100 MHz,  $\text{CDCl}_3$ ):  $\delta$  150.9, 144.8, 135.5, 133.5, 132.6, 131.7, 129.9, 129.8, 129.7, 129.2, 128.6, 128.4, 128.2, 127.7, 126.8, 123.9, 123.4, 118.4, 118.3, 115.4, 114.7, 53.4, 20.5; HRMS (ESI) calcd for  $\text{C}_{26}\text{H}_{24}\text{NO}$  ( $\text{M}+\text{H}$ ) $^+$  366.1852, found 366.1855.

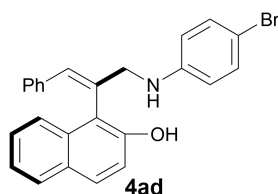

(*E*)-1-(3-((4-Bromophenyl)amino)-1-phenylprop-1-en-2-yl)naphthalen-2-ol **4ad** was obtained as a yellowish oil in 73% yield (31.3 mg) and 83% ee.  $R_f = 0.30$  (petroleum ether/ethyl acetate = 4:1). The ee value was determined by chiral stationary phase HPLC analysis [Daicel Chiralpak AD-H, isopropanol/hexane (15:85), 1.0 mL/min,  $\lambda = 254$  nm,  $t_r$  (major) = 12.27 min,  $t_r$  (minor) = 14.86 min].  $[\alpha]_D^{25} = -12.0$  ( $c = 1.00$ , EtOAc);  $^1\text{H NMR}$  (400 MHz,  $\text{CDCl}_3$ ):  $\delta$  7.85-7.72 (m, 2H), 7.69 (d,  $J = 8.4$  Hz, 1H), 7.45-7.30 (m, 2H), 7.29-7.19 (m, 3H), 7.18-7.10 (m, 2H), 7.08-6.98 (m, 2H), 6.97-6.88 (m, 2H), 6.62-6.49 (m, 2H), 4.18 (d,  $J = 15.6$  Hz, 1H), 4.04 (d,  $J = 15.6$  Hz, 1H);  $^{13}\text{C NMR}$  (100 MHz,  $\text{CDCl}_3$ ):  $\delta$  150.2, 146.5, 135.2, 133.1, 132.2, 132.1, 132.0, 131.9, 129.9, 129.4, 128.6, 128.4, 128.4, 128.0, 127.1, 123.8,

123.7, 118.0, 117.9, 116.8, 115.3, 110.2, 52.0; HRMS (ESI) calcd for C<sub>25</sub>H<sub>21</sub>BrNO (M+H)<sup>+</sup> 430.0801, found 430.0779.

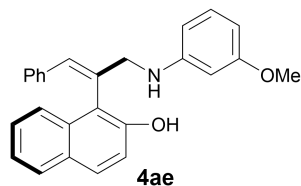

(*E*)-1-(3-((3-Methoxyphenyl)amino)-1-phenylprop-1-en-2-yl)naphthalen-2-ol **4ae** was obtained as a yellowish oil in 84% yield (32.0 mg) and 87% ee.  $R_f = 0.30$  (petroleum ether/ethyl acetate = 4:1). The ee value was determined by chiral stationary phase HPLC analysis [Daicel Chiralpak AD-H, isopropanol/hexane (20:80), 1.0 mL/min,  $\lambda = 254$  nm,  $t_r$  (major) = 10.86 min,  $t_r$  (minor) = 15.81 min].  $[\alpha]_D^{25} = -14.2$  ( $c = 1.00$ , EtOAc); <sup>1</sup>H NMR (400 MHz, CDCl<sub>3</sub>):  $\delta$  7.82-7.66 (m, 3H), 7.38 (t,  $J = 7.6$  Hz, 1H), 7.31 (t,  $J = 7.6$  Hz, 1H), 7.18-7.11 (m, 2H), 7.08 (t,  $J = 8.0$  Hz, 1H), 7.04-6.96 (m, 3H), 6.96-6.89 (m, 2H), 6.35-6.23 (m, 3H), 4.19 (d,  $J = 15.6$  Hz, 1H), 4.05 (d,  $J = 15.6$  Hz, 1H), 3.71 (s, 3H); <sup>13</sup>C NMR (100 MHz, CDCl<sub>3</sub>):  $\delta$  160.9, 150.5, 149.0, 135.5, 133.0, 132.5, 131.9, 130.3, 129.8, 129.3, 128.6, 128.4, 128.4, 127.8, 127.0, 123.9, 123.6, 118.2, 106.8, 104.0, 99.8, 55.1, 52.2; HRMS (ESI) calcd for C<sub>26</sub>H<sub>24</sub>NO<sub>2</sub> (M+H)<sup>+</sup> 382.1802, found 382.1775.

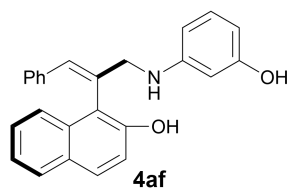

(*E*)-1-(3-((3-Hydroxyphenyl)amino)-1-phenylprop-1-en-2-yl)naphthalen-2-ol **4af** was obtained as a yellowish oil in 72% yield (26.4 mg) and 84% ee.  $R_f = 0.25$  (petroleum ether/ethyl acetate = 4:1). The ee value was determined by chiral stationary phase HPLC analysis [Daicel Chiralpak AD-H, isopropanol/hexane (30:70), 1.0 mL/min,  $\lambda = 254$  nm,  $t_r$  (major) = 9.24 min,  $t_r$  (minor) = 14.44 min].  $[\alpha]_D^{25} = -13.0$  ( $c = 1.00$ , EtOAc); <sup>1</sup>H NMR (400 MHz, CDCl<sub>3</sub>):  $\delta$  7.81 (d,  $J = 8.0$  Hz, 1H), 7.76 (d,  $J = 8.8$  Hz, 1H), 7.70 (d,  $J = 8.4$  Hz, 1H), 7.43-7.30 (m, 2H), 7.25 (s, 1H), 7.20-7.10 (m, 2H), 7.07-6.90 (m, 5H), 6.35-6.15 (m, 3H), 4.20 (d,  $J = 15.6$  Hz, 1H), 4.04 (d,  $J = 15.2$  Hz, 1H); <sup>13</sup>C NMR (100 MHz, CDCl<sub>3</sub>):  $\delta$  156.8, 150.3, 148.8, 135.3, 133.2, 132.1, 131.8, 130.5, 129.8, 129.3, 128.5, 128.4, 128.3, 127.8, 127.0, 123.8, 123.6, 118.1, 118.0, 106.7, 105.9, 100.9, 52.2; HRMS (ESI) calcd for C<sub>25</sub>H<sub>22</sub>NO<sub>2</sub> (M+H)<sup>+</sup> 368.1645, found 368.1629.

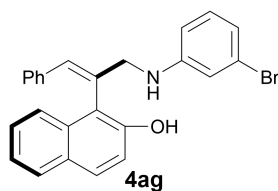

(*E*)-1-(3-((3-Bromophenyl)amino)-1-phenylprop-1-en-2-yl)naphthalen-2-ol **4ag** was obtained as a yellowish oil in 83% yield (35.6 mg) and 86% ee.  $R_f = 0.30$  (petroleum ether/ethyl acetate = 4:1). The ee value was determined by chiral stationary phase HPLC analysis [Daicel Chiralpak AD-H, isopropanol/hexane (15:85), 1.0 mL/min,  $\lambda = 254$  nm,  $t_r$  (major) = 10.21 min,  $t_r$  (minor) = 12.76 min].  $[\alpha]_D^{25} = -11.4$  ( $c = 1.00$ , EtOAc);  $^1\text{H NMR}$  (400 MHz,  $\text{CDCl}_3$ ):  $\delta$  7.82 (d,  $J = 8.0$  Hz, 1H), 7.77 (d,  $J = 8.8$  Hz, 1H), 7.71 (d,  $J = 8.4$  Hz, 1H), 7.43 (t,  $J = 7.6$  Hz, 1H), 7.35 (t,  $J = 7.6$  Hz, 1H), 7.20-7.12 (m, 2H), 7.10-6.92 (m, 6H), 6.90-6.79 (m, 2H), 6.64-6.54 (m, 1H), 4.19 (d,  $J = 15.6$  Hz, 1H), 4.07 (d,  $J = 16.0$  Hz, 1H);  $^{13}\text{C NMR}$  (100 MHz,  $\text{CDCl}_3$ ):  $\delta$  150.1, 148.8, 135.2, 133.0, 131.9, 131.9, 130.7, 129.9, 129.4, 128.6, 128.4, 127.9, 127.1, 123.8, 123.7, 123.4, 121.2, 117.9, 117.8, 116.3, 112.2, 51.6; HRMS (ESI) calcd for  $\text{C}_{25}\text{H}_{21}\text{BrNO}$  ( $\text{M}+\text{H}$ ) $^+$  430.0801, found 430.0769.

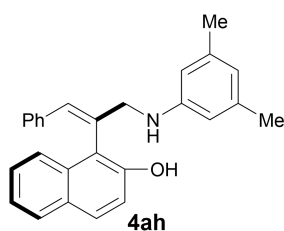

(*E*)-1-(3-((3,5-Dimethylphenyl)amino)-1-phenylprop-1-en-2-yl)naphthalen-2-ol **4ah** was obtained as a yellowish oil in 76% yield (28.8 mg) and 85% ee.  $R_f = 0.30$  (petroleum ether/ethyl acetate = 4:1). The ee value was determined by chiral stationary phase HPLC analysis [Daicel Chiralpak AD-H, isopropanol/hexane (15:85), 1.0 mL/min,  $\lambda = 254$  nm,  $t_r$  (major) = 8.33 min,  $t_r$  (minor) = 9.53 min].  $[\alpha]_D^{25} = -11.6$  ( $c = 1.00$ , EtOAc);  $^1\text{H NMR}$  (400 MHz,  $\text{CDCl}_3$ ):  $\delta$  7.88-7.67 (m, 3H), 7.42-7.28 (m, 2H), 7.21-7.12 (m, 2H), 7.10-6.86 (m, 5H), 6.45 (s, 1H), 6.38 (s, 2H), 4.20 (d,  $J = 14.8$  Hz, 1H), 4.04 (d,  $J = 14.8$  Hz, 1H), 2.23 (s, 6H);  $^{13}\text{C NMR}$  (100 MHz,  $\text{CDCl}_3$ ):  $\delta$  150.7, 147.3, 139.1, 135.5, 133.1, 132.7, 131.8, 129.7, 129.3, 128.4, 128.4, 128.3, 127.7, 126.8, 123.9, 123.5, 121.1, 118.3, 118.3, 112.3, 52.7, 21.5; HRMS (ESI) calcd for  $\text{C}_{27}\text{H}_{26}\text{NO}$  ( $\text{M}+\text{H}$ ) $^+$  380.2009, found 380.2010.

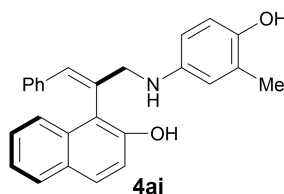

(*E*)-1-(3-((4-Hydroxy-3-methylphenyl)amino)-1-phenylprop-1-en-2-yl)naphthalen-2-ol **4ai**

was obtained as a yellowish oil in 65% yield (24.8 mg) and 81% ee.  $R_f = 0.25$  (petroleum ether/ethyl acetate = 4:1). The ee value was determined by chiral stationary phase HPLC analysis [Daicel Chiralpak AS-H, isopropanol/hexane (30:70), 1.0 mL/min,  $\lambda = 254$  nm,  $t_r$  (minor) = 8.28 min,  $t_r$  (major) = 15.21 min].  $[\alpha]_D^{25} = +20.1$  ( $c = 1.00$ , EtOAc);  $^1\text{H NMR}$  (400 MHz,  $\text{CDCl}_3$ ):  $\delta$  7.74 (t,  $J = 8.8$  Hz, 2H), 7.67 (d,  $J = 8.0$  Hz, 1H), 7.32-7.15 (m, 3H), 7.07 (s, 1H), 7.03-6.80 (m, 5H), 6.63-6.52 (m, 2H), 6.52-6.43 (m, 1H), 4.15 (d,  $J = 14.0$  Hz, 1H), 3.94 (d,  $J = 15.6$  Hz, 1H), 2.13 (s, 3H);  $^{13}\text{C NMR}$  (100 MHz,  $\text{CDCl}_3$ ):  $\delta$  151.5, 148.2, 140.3, 135.7, 134.0, 132.8, 131.6, 129.7, 129.2, 128.5, 128.4, 128.2, 127.7, 126.7, 125.2, 124.0, 123.4, 119.1, 118.9, 118.8, 115.9, 114.5, 55.3, 16.1; HRMS (ESI) calcd for  $\text{C}_{26}\text{H}_{23}\text{NNaO}_2$  ( $\text{M}+\text{Na}$ ) $^+$  404.1621, found 404.1626.

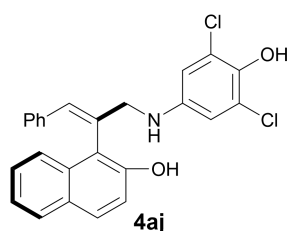

(*E*)-1-(3-((3,5-Dichloro-4-hydroxyphenyl)amino)-1-phenylprop-1-en-2-yl)naphthalen-2-ol

**4aj** was obtained as a yellowish oil in 62% yield (27.0 mg) and 83% ee.  $R_f = 0.25$  (petroleum ether/ethyl acetate = 4:1). The ee value was determined by chiral stationary phase HPLC analysis [Daicel Chiralpak IC, isopropanol/hexane (10:90), 1.0 mL/min,  $\lambda = 254$  nm,  $t_r$  (major) = 7.13 min,  $t_r$  (minor) = 8.13 min].  $[\alpha]_D^{25} = +20.6$  ( $c = 1.00$ , EtOAc);  $^1\text{H NMR}$  (400 MHz,  $\text{CDCl}_3$ ):  $\delta$  7.84-7.72 (m, 2H), 7.69 (d,  $J = 8.4$  Hz, 1H), 7.40 (t,  $J = 7.6$  Hz, 1H), 7.34 (t,  $J = 7.6$  Hz, 1H), 7.19-7.09 (m, 2H), 7.08-6.98 (m, 3H), 6.98-6.91 (m, 2H), 6.60 (s, 2H), 4.12 (d,  $J = 15.2$  Hz, 1H), 4.02 (d,  $J = 15.2$  Hz, 1H);  $^{13}\text{C NMR}$  (100 MHz,  $\text{CDCl}_3$ ):  $\delta$  150.2, 141.6, 140.4, 135.2, 133.1, 131.9, 131.8, 129.9, 129.4, 128.6, 128.4, 128.0, 127.1, 123.8, 121.7, 118.0, 117.8, 115.2, 113.7, 52.4; HRMS (ESI) calcd for  $\text{C}_{25}\text{H}_{19}\text{Cl}_2\text{NNaO}_2$  ( $\text{M}+\text{Na}$ ) $^+$  458.0685, found 458.0696.

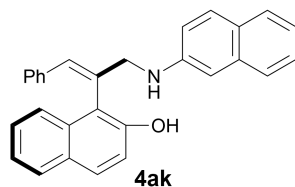

(*E*)-1-(3-(Naphthalen-2-ylamino)-1-phenylprop-1-en-2-yl)naphthalen-2-ol **4ak** was obtained as a yellowish oil in 79% yield (31.7 mg) and 85% ee.  $R_f = 0.30$  (petroleum ether/ethyl acetate = 4:1). The ee value was determined by chiral stationary phase HPLC analysis [Daicel Chiralpak IC, isopropanol/hexane (05:95), 1.0 mL/min,  $\lambda = 254$  nm,  $t_r$  (major) = 9.31 min,  $t_r$  (minor) = 10.09 min].  $[\alpha]_D^{25} = -8.20$  ( $c = 1.00$ , EtOAc);  $^1\text{H NMR}$  (400 MHz,  $\text{CDCl}_3$ ):  $\delta$

7.86-7.72 (m, 3H), 7.71-7.54 (m, 4H), 7.46-7.31 (m, 3H), 7.22-7.12 (m, 2H), 7.07-6.83 (m, 7H), 4.32 (d,  $J = 15.6$  Hz, 1H), 4.15 (d,  $J = 15.2$  Hz, 1H);  $^{13}\text{C}$  NMR (100 MHz,  $\text{CDCl}_3$ ):  $\delta$  150.5, 145.1, 135.4, 135.0, 133.2, 132.1, 132.0, 129.8, 129.4, 129.3, 128.6, 128.4, 128.4, 128.0, 127.9, 127.7, 127.1, 126.5, 126.4, 126.2, 125.9, 123.9, 123.7, 122.6, 118.2, 118.1, 118.1, 106.0, 52.0; HRMS (ESI) calcd for  $\text{C}_{29}\text{H}_{24}\text{NO}$  ( $\text{M}+\text{H}$ ) $^+$  402.1852, found 402.1830.

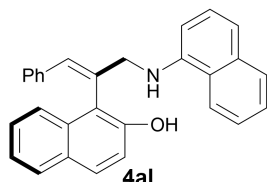

(*E*)-1-(3-(Naphthalen-1-ylamino)-1-phenylprop-1-en-2-yl)naphthalen-2-ol **4al** was obtained as a yellowish oil in 64% yield (25.7 mg) and 66% ee.  $R_f = 0.30$  (petroleum ether/ethyl acetate = 4:1). The ee value was determined by chiral stationary phase HPLC analysis [Daicel Chiralpak IC, isopropanol/hexane (07:93), 1.0 mL/min,  $\lambda = 254$  nm,  $t_r$  (major) = 5.73 min,  $t_r$  (minor) = 6.22 min].  $[\alpha]_{\text{D}}^{25} = -9.63$  ( $c = 1.00$ , EtOAc);  $^1\text{H}$  NMR (400 MHz,  $\text{CDCl}_3$ ):  $\delta$  7.89-7.68 (m, 6H), 7.47-7.39 (m, 3H), 7.38-7.25 (m, 4H), 7.17 (d,  $J = 8.8$  Hz, 1H), 7.08-6.94 (m, 4H), 6.82-6.75 (m, 1H), 4.40 (d,  $J = 14.8$  Hz, 1H), 4.28 (d,  $J = 14.8$  Hz, 1H);  $^{13}\text{C}$  NMR (100 MHz,  $\text{CDCl}_3$ ):  $\delta$  150.5, 142.5, 135.4, 134.4, 133.5, 131.9, 131.9, 129.9, 129.4, 128.8, 128.6, 128.5, 128.4, 127.9, 127.1, 126.5, 125.9, 125.2, 123.9, 123.9, 123.7, 119.9, 118.9, 118.1, 118.1, 105.9, 52.4; HRMS (ESI) calcd for  $\text{C}_{29}\text{H}_{24}\text{NO}$  ( $\text{M}+\text{H}$ ) $^+$  402.1852, found 402.1848.

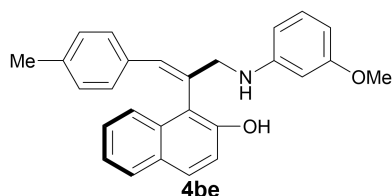

(*E*)-1-(3-((3-Methoxyphenyl)amino)-1-(*p*-tolyl)prop-1-en-2-yl)naphthalen-2-ol **4be** was obtained as a yellowish oil in 73% yield (28.9 mg) and 89% ee.  $R_f = 0.30$  (petroleum ether/ethyl acetate = 4:1). The ee value was determined by chiral stationary phase HPLC analysis [Daicel Chiralpak AD-H, isopropanol/hexane (30:70), 1.0 mL/min,  $\lambda = 254$  nm,  $t_r$  (major) = 7.40 min,  $t_r$  (minor) = 11.14 min].  $[\alpha]_{\text{D}}^{25} = -14.8$  ( $c = 1.00$ , EtOAc);  $^1\text{H}$  NMR (400 MHz,  $\text{CDCl}_3$ ):  $\delta$  7.85-7.66 (m, 3H), 7.44-7.29 (m, 2H), 7.21-7.05 (m, 3H), 6.83 (s, 4H), 6.33 (d,  $J = 8.0$  Hz, 2H), 6.28 (s, 1H), 4.22 (d,  $J = 15.6$  Hz, 1H), 4.07 (d,  $J = 15.6$  Hz, 1H), 3.73 (s, 3H), 2.16 (s, 3H);  $^{13}\text{C}$  NMR (100 MHz,  $\text{CDCl}_3$ ):  $\delta$  160.9, 150.5, 149.0, 137.7, 132.9, 131.3, 130.2, 129.7, 129.1, 128.5, 128.4, 127.0, 123.9, 123.6, 118.3, 118.1, 108.1, 106.8, 104.1, 104.0, 101.2, 99.7, 55.1, 52.2, 21.1; HRMS (ESI) calcd for  $\text{C}_{27}\text{H}_{26}\text{NO}_2$  ( $\text{M}+\text{H}$ ) $^+$  396.1958, found 396.1929.



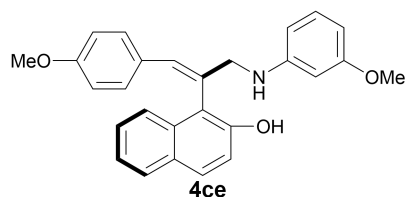

(*E*)-1-(1-(4-Methoxyphenyl)-3-((3-methoxyphenyl)amino)prop-1-en-2-yl)naphthalen-2-ol **4ce** was obtained as a yellowish oil in 84% yield (34.5 mg) and 86% ee.  $R_f = 0.30$  (petroleum ether/ethyl acetate = 4:1). The ee value was determined by chiral stationary phase HPLC analysis [Daicel Chiralpak AD-H, isopropanol/hexane (30:70), 1.0 mL/min,  $\lambda = 254$  nm,  $t_r$  (major) = 9.45 min,  $t_r$  (minor) = 16.12 min].  $[\alpha]_D^{25} = -18.5$  ( $c = 1.00$ , EtOAc);  $^1\text{H NMR}$  (400 MHz,  $\text{CDCl}_3$ ):  $\delta$  7.80 (d,  $J = 8.0$  Hz, 1H), 7.77-7.67 (m, 2H), 7.38 (t,  $J = 7.6$  Hz, 1H), 7.32 (t,  $J = 7.6$  Hz, 1H), 7.17 (d,  $J = 8.8$  Hz, 1H), 7.12-7.03 (m, 2H), 6.86 (d,  $J = 8.4$  Hz, 2H), 6.53 (d,  $J = 8.4$  Hz, 2H), 6.31 (d,  $J = 8.4$  Hz, 2H), 6.26 (s, 1H), 4.18 (d,  $J = 15.2$  Hz, 1H), 4.04 (d,  $J = 15.2$  Hz, 1H), 3.72 (s, 3H), 3.62 (s, 3H);  $^{13}\text{C NMR}$  (100 MHz,  $\text{CDCl}_3$ ):  $\delta$  160.9, 159.1, 150.6, 149.0, 132.6, 132.0, 130.2, 129.8, 129.8, 129.7, 129.4, 128.5, 128.2, 127.0, 123.9, 123.6, 118.3, 118.1, 113.8, 106.8, 104.0, 99.8, 55.1, 55.1, 52.3; HRMS (ESI) calcd for  $\text{C}_{27}\text{H}_{26}\text{NO}_3$  ( $\text{M}+\text{H}$ ) $^+$  412.1907, found 412.1897.

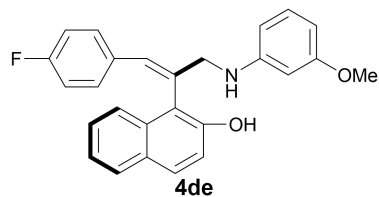

(*E*)-1-(1-(4-Fluorophenyl)-3-((3-methoxyphenyl)amino)prop-1-en-2-yl)naphthalen-2-ol **4de** was obtained as a yellowish oil in 69% yield (27.5 mg) and 88% ee.  $R_f = 0.30$  (petroleum ether/ethyl acetate = 4:1). The ee value was determined by chiral stationary phase HPLC analysis [Daicel Chiralpak AD-H, isopropanol/hexane (30:70), 1.0 mL/min,  $\lambda = 254$  nm,  $t_r$  (major) = 5.84 min,  $t_r$  (minor) = 8.74 min].  $[\alpha]_D^{25} = +8.50$  ( $c = 1.00$ , EtOAc);  $^1\text{H NMR}$  (400 MHz,  $\text{CDCl}_3$ ):  $\delta$  7.85-7.72 (m, 2H), 7.69 (d,  $J = 8.4$  Hz, 1H), 7.43-7.29 (m, 2H), 7.17 (d,  $J = 8.8$  Hz, 1H), 7.14-7.02 (m, 2H), 6.95-6.82 (m, 2H), 6.68 (t,  $J = 8.8$  Hz, 2H), 6.39-6.26 (m, 3H), 4.21 (d,  $J = 15.6$  Hz, 1H), 4.07 (d,  $J = 15.6$  Hz, 1H), 3.73 (s, 3H);  $^{13}\text{C NMR}$  (100 MHz,  $\text{CDCl}_3$ ):  $\delta$  162.0 (d,  $^1J_{\text{C-F}} = 246.8$  Hz), 160.9, 150.6, 148.6, 132.1, 132.0, 131.9, 131.7, 131.6 (d,  $^4J_{\text{C-F}} = 3.3$  Hz), 130.2, 130.1 (d,  $^3J_{\text{C-F}} = 8.0$  Hz), 129.9, 129.3, 128.6, 127.0, 123.7, 123.6, 118.1, 117.7, 115.2 (d,  $^2J_{\text{C-F}} = 21.2$  Hz), 107.0, 104.2, 100.0, 55.1, 52.3;  $^{19}\text{F NMR}$  (376 MHz,  $\text{CDCl}_3$ )  $\delta$  -113.36; HRMS (ESI) calcd for  $\text{C}_{26}\text{H}_{23}\text{FNO}_2$  ( $\text{M}+\text{H}$ ) $^+$  400.1707, found 400.1705.

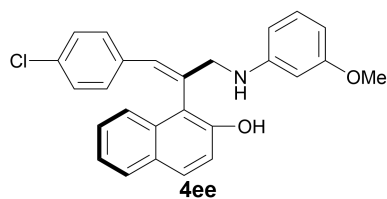

(*E*)-1-(1-(4-Chlorophenyl)-3-((3-methoxyphenyl)amino)prop-1-en-2-yl)naphthalen-2-ol **4ee** was obtained as a yellowish oil in 70% yield (29.1 mg) and 88% ee.  $R_f = 0.30$  (petroleum ether/ethyl acetate = 4:1). The ee value was determined by chiral stationary phase HPLC analysis [Daicel Chiralpak AD-H, isopropanol/hexane (30:70), 1.0 mL/min,  $\lambda = 254$  nm,  $t_r$  (major) = 6.41 min,  $t_r$  (minor) = 9.13 min].  $[\alpha]_D^{25} = -13.8$  ( $c = 1.00$ , EtOAc);  $^1\text{H NMR}$  (400 MHz,  $\text{CDCl}_3$ ):  $\delta$  7.85-7.72 (m, 2H), 7.68 (d,  $J = 8.4$  Hz, 1H), 7.39 (t,  $J = 7.6$  Hz, 1H), 7.33 (t,  $J = 7.6$  Hz, 1H), 7.16 (d,  $J = 8.8$  Hz, 1H), 7.13-7.05 (m, 2H), 6.96 (d,  $J = 8.0$  Hz, 2H), 6.85 (d,  $J = 8.0$  Hz, 2H), 6.39-6.30 (m, 2H), 6.28 (s, 1H), 4.20 (d,  $J = 15.6$  Hz, 1H), 4.07 (d,  $J = 15.6$  Hz, 1H), 3.73 (s, 3H);  $^{13}\text{C NMR}$  (100 MHz,  $\text{CDCl}_3$ ):  $\delta$  160.9, 150.6, 148.9, 134.1, 133.5, 131.4, 130.3, 129.9, 129.6, 128.6, 128.5, 127.1, 123.7, 123.7, 118.2, 117.8, 108.1, 106.9, 104.2, 104.1, 101.3, 99.8, 55.1, 52.1; HRMS (ESI) calcd for  $\text{C}_{26}\text{H}_{23}\text{ClNO}_2$  ( $\text{M}+\text{H}$ ) $^+$  416.1412, found 416.1399.

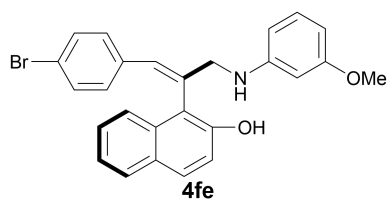

(*E*)-1-(1-(4-Bromophenyl)-3-((3-methoxyphenyl)amino)prop-1-en-2-yl)naphthalen-2-ol **4fe** was obtained as a yellowish oil in 78% yield (35.8 mg) and 88% ee.  $R_f = 0.30$  (petroleum ether/ethyl acetate = 4:1). The ee value was determined by chiral stationary phase HPLC analysis [Daicel Chiralpak AD-H, isopropanol/hexane (30:70), 1.0 mL/min,  $\lambda = 254$  nm,  $t_r$  (major) = 6.83 min,  $t_r$  (minor) = 9.32 min].  $[\alpha]_D^{25} = -12.2$  ( $c = 1.00$ , EtOAc);  $^1\text{H NMR}$  (400 MHz,  $\text{CDCl}_3$ ):  $\delta$  7.84-7.71 (m, 2H), 7.66 (d,  $J = 8.0$  Hz, 1H), 7.43-7.27 (m, 2H), 7.19-7.00 (m, 5H), 6.77 (d,  $J = 8.0$  Hz, 2H), 6.39-6.24 (m, 3H), 4.17 (d,  $J = 15.6$  Hz, 1H), 4.04 (d,  $J = 15.6$  Hz, 1H), 3.72 (s, 3H);  $^{13}\text{C NMR}$  (100 MHz,  $\text{CDCl}_3$ ):  $\delta$  160.9, 150.5, 148.9, 134.5, 133.7, 131.7, 131.4, 131.4, 130.3, 130.0, 129.9, 129.3, 128.6, 127.1, 123.7, 123.7, 121.7, 118.2, 117.8, 106.9, 104.1, 99.8, 55.1, 52.1; HRMS (ESI) calcd for  $\text{C}_{26}\text{H}_{23}\text{BrNO}_2$  ( $\text{M}+\text{H}$ ) $^+$  460.0907, found 460.0881.

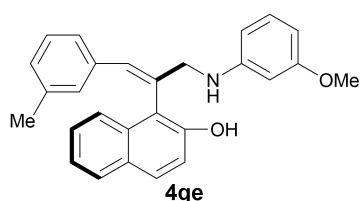

(*E*)-1-(3-((3-Methoxyphenyl)amino)-1-(*m*-tolyl)prop-1-en-2-yl)naphthalen-2-ol **4ge** was obtained as a yellowish oil in 65% yield (25.7 mg) and 87% ee.  $R_f = 0.30$  (petroleum ether/ethyl acetate = 4:1). The ee value was determined by chiral stationary phase HPLC analysis [Daicel Chiralpak AD-H, isopropanol/hexane (30:70), 1.0 mL/min,  $\lambda = 254$  nm,  $t_r$  (major) = 6.84 min,  $t_r$  (minor) = 8.05 min].  $[\alpha]_D^{25} = -7.50$  ( $c = 1.00$ , EtOAc);  $^1\text{H NMR}$  (400 MHz,  $\text{CDCl}_3$ ):  $\delta$  7.81 (d,  $J = 7.6$  Hz, 1H), 7.76 (d,  $J = 8.8$  Hz, 1H), 7.72 (d,  $J = 8.4$  Hz, 1H), 7.43-7.37 (m, 1H), 7.36-7.30 (m, 1H), 7.17 (d,  $J = 8.8$  Hz, 1H), 7.14 (s, 1H), 7.10 (t,  $J = 8.4$  Hz, 1H), 6.90-6.83 (m, 2H), 6.81 (s, 1H), 6.73-6.64 (m, 1H), 6.37-6.31 (m, 2H), 6.30-6.24 (m, 1H), 4.23 (d,  $J = 16.8$  Hz, 1H), 4.08 (d,  $J = 16.8$  Hz, 1H), 3.74 (s, 3H), 2.08 (s, 3H);  $^{13}\text{C NMR}$  (100 MHz,  $\text{CDCl}_3$ ):  $\delta$  160.9, 150.5, 148.9, 137.7, 135.3, 133.3, 132.1, 131.9, 130.2, 129.7, 129.3, 128.6, 128.5, 128.2, 126.9, 125.0, 123.9, 123.5, 118.2, 118.1, 106.8, 104.0, 99.8, 55.1, 52.2, 21.3; HRMS (ESI) calcd for  $\text{C}_{27}\text{H}_{26}\text{NO}_2$  ( $\text{M}+\text{H}$ ) $^+$  396.1958, found 396.1960.

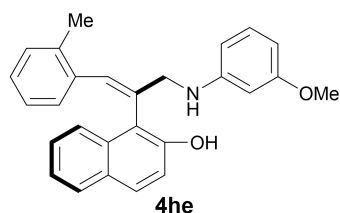

(*E*)-1-(3-((3-Methoxyphenyl)amino)-1-(*o*-tolyl)prop-1-en-2-yl)naphthalen-2-ol **4he** was obtained as a yellowish oil in 80% yield (31.6 mg) and 84% ee.  $R_f = 0.30$  (petroleum ether/ethyl acetate = 4:1). The ee value was determined by chiral stationary phase HPLC analysis [Daicel Chiralpak AD-H, isopropanol/hexane (30:70), 1.0 mL/min,  $\lambda = 254$  nm,  $t_r$  (major) = 5.94 min,  $t_r$  (minor) = 11.69 min].  $[\alpha]_D^{25} = +20.1$  ( $c = 1.00$ , EtOAc);  $^1\text{H NMR}$  (400 MHz,  $\text{CDCl}_3$ ):  $\delta$  7.74 (t,  $J = 9.6$  Hz, 2H), 7.67 (d,  $J = 8.8$  Hz, 1H), 7.41 (t,  $J = 7.6$  Hz, 1H), 7.35-7.27 (m, 2H), 7.15-7.00 (m, 3H), 6.92 (t,  $J = 7.6$  Hz, 1H), 6.71 (d,  $J = 7.6$  Hz, 1H), 6.62 (t,  $J = 7.6$  Hz, 1H), 6.40-6.25 (m, 3H), 4.29 (d,  $J = 15.6$  Hz, 1H), 4.11 (d,  $J = 15.6$  Hz, 1H), 3.74 (s, 3H), 2.32 (s, 3H);  $^{13}\text{C NMR}$  (100 MHz,  $\text{CDCl}_3$ ):  $\delta$  161.0, 150.8, 148.8, 136.0, 134.5, 132.8, 132.4, 132.2, 130.2, 129.8, 129.5, 129.1, 128.5, 127.7, 127.6, 126.8, 125.6, 123.9, 123.3, 117.9, 117.8, 107.1, 104.1, 100.1, 55.1, 51.8, 20.0; HRMS (ESI) calcd for  $\text{C}_{27}\text{H}_{26}\text{NO}_2$  ( $\text{M}+\text{H}$ ) $^+$  396.1958, found 396.1936.

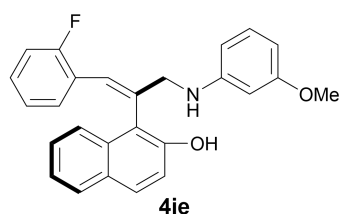

(*E*)-1-(1-(2-Fluorophenyl)-3-((3-methoxyphenyl)amino)prop-1-en-2-yl)naphthalen-2-ol **4ie**

was obtained as a yellowish oil in 88% yield (35.1 mg) and 89% ee.  $R_f = 0.30$  (petroleum ether/ethyl acetate = 4:1). The ee value was determined by chiral stationary phase HPLC analysis [Daicel Chiralpak AD-H, isopropanol/hexane (30:70), 1.0 mL/min,  $\lambda = 254$  nm,  $t_r$  (major) = 6.08 min,  $t_r$  (minor) = 9.32 min].  $[\alpha]_D^{25} = +36.6$  ( $c = 1.00$ , EtOAc);  $^1\text{H NMR}$  (400 MHz,  $\text{CDCl}_3$ ):  $\delta$  7.80-7.75 (m, 1H), 7.75-7.66 (m, 2H), 7.43-7.35 (m, 2H), 7.34-7.27 (m, 1H), 7.14 (d,  $J = 8.8$  Hz, 1H), 7.10 (t,  $J = 8.0$  Hz, 1H), 7.04-6.96 (m, 1H), 6.95-6.87 (m, 1H), 6.70-6.62 (m, 1H), 6.59-6.50 (m, 1H), 6.38-6.32 (m, 2H), 6.31-6.28 (m, 1H), 4.27 (dd,  $J = 15.2, 1.2$  Hz, 1H), 4.11 (dd,  $J = 15.2, 1.6$  Hz, 1H), 3.73 (s, 3H);  $^{13}\text{C NMR}$  (100 MHz,  $\text{CDCl}_3$ ):  $\delta$  160.9, 160.3 (d,  $^1J_{\text{C-F}} = 246.7$  Hz), 150.9, 148.7, 134.8, 131.8, 130.3, 129.9, 129.3 (d,  $^3J_{\text{C-F}} = 8.4$  Hz), 129.2, 128.5, 128.5, 127.0, 125.3 (d,  $^3J_{\text{C-F}} = 5.8$  Hz), 123.8 (d,  $^4J_{\text{C-F}} = 3.5$  Hz), 123.6 (d,  $^2J_{\text{C-F}} = 16.9$  Hz), 123.5, 123.4, 118.2, 117.7, 115.1 (d,  $^2J_{\text{C-F}} = 22.1$  Hz), 107.1, 104.6, 100.0, 55.1, 52.5;  $^{19}\text{F NMR}$  (376 MHz,  $\text{CDCl}_3$ )  $\delta$  -116.74; HRMS (ESI) calcd for  $\text{C}_{26}\text{H}_{23}\text{FNO}_2$  ( $\text{M}+\text{H}$ ) $^+$  400.1707, found 400.1710.

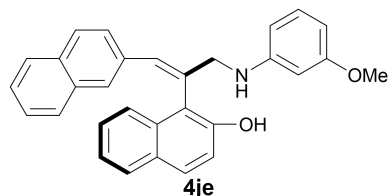

(*E*)-1-(3-((3-Methoxyphenyl)amino)-1-(naphthalen-2-yl)prop-1-en-2-yl)naphthalen-2-ol **4je** was obtained as a yellowish oil in 91% yield (39.2 mg) and 90% ee.  $R_f = 0.30$  (petroleum ether/ethyl acetate = 4:1). The ee value was determined by chiral stationary phase HPLC analysis [Daicel Chiralpak IC, isopropanol/hexane (10:90), 1.0 mL/min,  $\lambda = 254$  nm,  $t_r$  (major) = 5.40 min,  $t_r$  (minor) = 5.80 min].  $[\alpha]_D^{25} = -17.7$  ( $c = 1.00$ , EtOAc);  $^1\text{H NMR}$  (400 MHz,  $\text{CDCl}_3$ ):  $\delta$  7.84-7.71 (m, 3H), 7.62-7.55 (m, 1H), 7.54-7.46 (m, 2H), 7.40-7.27 (m, 6H), 7.17 (d,  $J = 8.8$  Hz, 1H), 7.10 (t,  $J = 8.0$  Hz, 1H), 6.95 (d,  $J = 8.4$  Hz, 1H), 6.39-6.29 (m, 3H), 4.25 (d,  $J = 15.6$  Hz, 1H), 4.11 (d,  $J = 15.2$  Hz, 1H), 3.73 (s, 3H);  $^{13}\text{C NMR}$  (100 MHz,  $\text{CDCl}_3$ ):  $\delta$  160.9, 150.7, 149.0, 133.2, 133.0, 132.9, 130.3, 129.8, 128.6, 128.1, 127.9, 127.4, 127.1, 126.1, 126.0, 125.5, 123.9, 123.6, 118.3, 118.2, 108.1, 106.9, 104.1, 104.1, 101.2, 99.8, 55.1, 52.3; HRMS (ESI) calcd for  $\text{C}_{30}\text{H}_{26}\text{NO}_2$  ( $\text{M}+\text{H}$ ) $^+$  432.1958, found 432.1938.

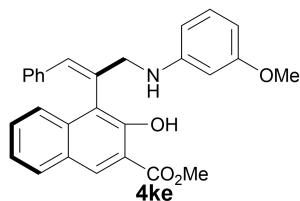

Methyl (*E*)-3-hydroxy-4-(3-((3-methoxyphenyl)amino)-1-phenylprop-1-en-2-yl)-2-naphthoate **4ke** was obtained as a yellowish oil in 48% yield (21.1 mg) and 30% ee.  $R_f = 0.15$  (petroleum ether/ethyl acetate = 4:1). The ee value was determined by chiral stationary phase HPLC

analysis [Daicel Chiralpak AD-H, isopropanol/hexane (30:70), 1.0 mL/min,  $\lambda = 254$  nm,  $t_r$  (major) = 11.54 min,  $t_r$  (minor) = 13.21 min].  $[\alpha]_D^{25} = -2.67$  ( $c = 1.00$ , EtOAc);  $^1\text{H NMR}$  (400 MHz,  $\text{CDCl}_3$ ):  $\delta$  8.51 (s, 1H), 7.80 (d,  $J = 8.4$  Hz, 1H), 7.72 (d,  $J = 8.4$  Hz, 1H), 7.39 (t,  $J = 7.6$  Hz, 1H), 7.29 (t,  $J = 7.6$  Hz, 1H), 7.12-6.85 (m, 7H), 6.40-6.30 (m, 2H), 6.29-6.19 (m, 1H), 4.21 (d,  $J = 16.0$  Hz, 1H), 4.08 (d,  $J = 16.0$  Hz, 1H), 4.04 (s, 3H), 3.75 (s, 3H);  $^{13}\text{C NMR}$  (100 MHz,  $\text{CDCl}_3$ ):  $\delta$  169.5, 159.8, 152.1, 148.5, 135.4, 134.3, 131.9, 131.3, 128.8, 128.7, 128.5, 127.2, 127.0, 126.1, 125.8, 123.1, 123.0, 120.1, 112.8, 105.0, 101.9, 97.5, 54.0, 51.7, 49.9; HRMS (ESI) calcd for  $\text{C}_{28}\text{H}_{24}\text{NO}_4$  ( $\text{M-H}^-$ ) 438.1711, found 438.1710.

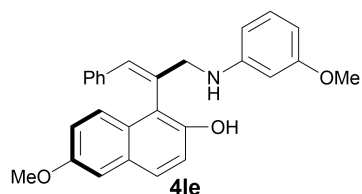

(*E*)-6-Methoxy-1-(3-((3-methoxyphenyl)amino)-1-phenylprop-1-en-2-yl)naphthalen-2-ol **4le** was obtained as a yellowish oil in 83% yield (34.1 mg) and 87% ee.  $R_f = 0.25$  (petroleum ether/ethyl acetate = 4:1). The ee value was determined by chiral stationary phase HPLC analysis [Daicel Chiralpak AD-H, isopropanol/hexane (30:70), 1.0 mL/min,  $\lambda = 254$  nm,  $t_r$  (major) = 6.96 min,  $t_r$  (minor) = 9.64 min].  $[\alpha]_D^{25} = -17.8$  ( $c = 1.00$ , EtOAc);  $^1\text{H NMR}$  (400 MHz,  $\text{CDCl}_3$ ):  $\delta$  7.74-7.61 (m, 2H), 7.16 (s, 1H), 7.13-6.93 (m, 9H), 6.41-6.29 (m, 3H), 4.21 (d,  $J = 16.0$  Hz, 1H), 4.09 (dd,  $J = 15.6, 1.6$  Hz, 1H), 3.74 (s, 3H), 3.73 (s, 3H);  $^{13}\text{C NMR}$  (100 MHz,  $\text{CDCl}_3$ ):  $\delta$  160.9, 158.7, 151.0, 148.7, 135.5, 133.3, 133.0, 132.5, 130.2, 130.0, 129.5, 128.3, 128.3, 127.8, 124.6, 117.3, 115.8, 115.4, 107.0, 103.9, 102.9, 100.0, 55.2, 55.1, 51.9; HRMS (ESI) calcd for  $\text{C}_{27}\text{H}_{24}\text{NO}_3$  ( $\text{M-H}^-$ ) 410.1762, found 410.1761.

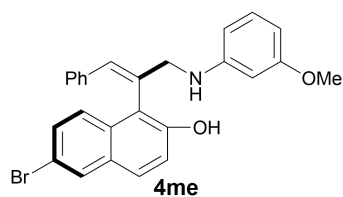

(*E*)-6-Bromo-1-(3-((3-methoxyphenyl)amino)-1-phenylprop-1-en-2-yl)naphthalen-2-ol **4me** was obtained as a yellowish oil in 69% yield (31.7 mg) and 80% ee.  $R_f = 0.30$  (petroleum ether/ethyl acetate = 4:1). The ee value was determined by chiral stationary phase HPLC analysis [Daicel Chiralpak AD-H, isopropanol/hexane (30:70), 1.0 mL/min,  $\lambda = 254$  nm,  $t_r$  (major) = 6.74 min,  $t_r$  (minor) = 10.26 min].  $[\alpha]_D^{25} = -15.3$  ( $c = 1.00$ , EtOAc);  $^1\text{H NMR}$  (400 MHz,  $\text{CDCl}_3$ ):  $\delta$  7.93 (s, 1H), 7.65 (d,  $J = 8.8$  Hz, 1H), 7.56 (d,  $J = 9.2$  Hz, 1H), 7.41 (d,  $J = 9.2$  Hz, 1H), 7.22-7.14 (m, 2H), 7.13-6.96 (m, 4H), 6.94-6.85 (m, 2H), 6.43-6.25 (m, 3H), 4.21 (d,  $J = 15.2$  Hz, 1H), 4.05 (d,  $J = 15.2$  Hz, 1H), 3.74 (s, 3H);  $^{13}\text{C NMR}$  (100 MHz,  $\text{CDCl}_3$ ):  $\delta$  160.9, 151.2, 148.3, 135.2, 133.9, 131.6, 130.4, 130.3, 130.3, 130.1, 128.8, 128.4,

128.4, 128.0, 125.7, 119.4, 118.5, 117.3, 107.3, 104.6, 100.4, 55.2, 52.8; HRMS (ESI) calcd for C<sub>26</sub>H<sub>21</sub>BrNO<sub>2</sub> (M-H)<sup>-</sup> 458.0761, found 458.0760.

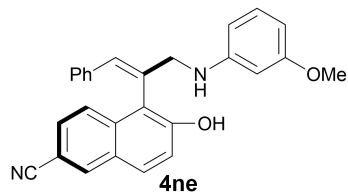

(*E*)-6-Hydroxy-5-(3-((3-methoxyphenyl)amino)-1-phenylprop-1-en-2-yl)-2-naphthonitrile **4ne** was obtained as a yellowish oil in 80% yield (32.5 mg) and 85% ee.  $R_f = 0.30$  (petroleum ether/ethyl acetate = 4:1). The ee value was determined by chiral stationary phase HPLC analysis [Daicel Chiralpak AD-H, isopropanol/hexane (30:70), 1.0 mL/min,  $\lambda = 254$  nm,  $t_r$  (major) = 7.33 min,  $t_r$  (minor) = 10.31 min].  $[\alpha]_D^{25} = -12.6$  ( $c = 1.00$ , EtOAc); <sup>1</sup>H NMR (400 MHz, DMSO-*d*<sub>6</sub>):  $\delta$  10.58 (s, 1H), 8.43 (s, 1H), 7.96 (d,  $J = 9.2$  Hz, 1H), 7.68 (d,  $J = 8.8$  Hz, 1H), 7.60-7.36 (m, 2H), 7.06-6.76 (m, 6H), 6.50-6.33 (m, 2H), 6.32-6.20 (m, 1H), 6.14 (d,  $J = 8.0$  Hz, 1H), 4.04 (dd,  $J = 18.0, 6.0$  Hz, 1H), 3.86 (dd,  $J = 17.6, 6.0$  Hz, 1H), 3.69 (s, 3H); <sup>13</sup>C NMR (100 MHz, DMSO-*d*<sub>6</sub>):  $\delta$  160.9, 155.8, 150.7, 137.0, 135.1, 135.0, 134.1, 130.4, 129.9, 128.5, 128.2, 127.4, 127.2, 127.1, 126.8, 125.1, 120.4, 120.0, 119.7, 106.1, 105.2, 102.0, 98.1, 55.1, 49.4; HRMS (ESI) calcd for C<sub>27</sub>H<sub>23</sub>N<sub>2</sub>O<sub>2</sub> (M+H)<sup>+</sup> 407.1754, found 407.1763.

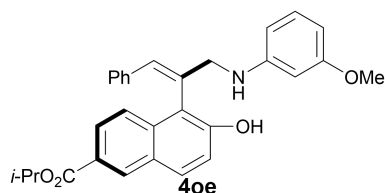

Isopropyl(*E*)-6-hydroxy-5-(3-((3-methoxyphenyl)amino)-1-phenylprop-1-en-2-yl)-2-naphthate **4oe** was obtained as a yellowish oil in 78% yield (36.4 mg) and 83% ee.  $R_f = 0.20$  (petroleum ether/ethyl acetate = 4:1). The ee value was determined by chiral stationary phase HPLC analysis [Daicel Chiralpak AD-H, isopropanol/hexane (30:70), 1.0 mL/min,  $\lambda = 254$  nm,  $t_r$  (major) = 5.52 min,  $t_r$  (minor) = 8.07 min].  $[\alpha]_D^{25} = -10.4$  ( $c = 1.00$ , EtOAc); <sup>1</sup>H NMR (400 MHz, CDCl<sub>3</sub>):  $\delta$  8.53 (s, 1H), 7.95 (d,  $J = 8.4$  Hz, 1H), 7.85 (d,  $J = 8.8$  Hz, 1H), 7.72 (d,  $J = 8.8$  Hz, 1H), 7.23 (d,  $J = 8.8$  Hz, 1H), 7.16 (s, 1H), 7.10 (t,  $J = 8.0$  Hz, 1H), 7.06-6.95 (m, 3H), 6.94-6.84 (m, 2H), 6.40-6.23 (m, 3H), 5.34-5.23 (m, 1H), 4.21 (d,  $J = 15.6$  Hz, 1H), 4.07 (d,  $J = 15.2$  Hz, 1H), 3.73 (s, 3H), 1.39 (d,  $J = 6.0$  Hz, 6H); <sup>13</sup>C NMR (100 MHz, CDCl<sub>3</sub>):  $\delta$  166.4, 160.9, 153.0, 148.7, 135.3, 134.3, 133.5, 131.9, 131.4, 131.2, 130.2, 128.3, 128.3, 128.2, 127.8, 126.4, 125.8, 123.9, 119.1, 118.5, 107.0, 104.3, 100.1, 68.4, 55.1, 52.4, 22.0; HRMS (ESI) calcd for C<sub>30</sub>H<sub>28</sub>NO<sub>4</sub> (M-H)<sup>-</sup> 466.2024, found 466.2023.

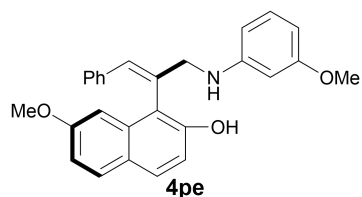

(*E*)-7-Methoxy-1-(3-((3-methoxyphenyl)amino)-1-phenylprop-1-en-2-yl)naphthalen-2-ol **4pe** was obtained as a yellowish oil in 90% yield (37.0 mg) and 86% ee.  $R_f = 0.25$  (petroleum ether/ethyl acetate = 4:1). The ee value was determined by chiral stationary phase HPLC analysis [Daicel Chiralpak IC, isopropanol/hexane (15:85), 1.0 mL/min,  $\lambda = 254$  nm,  $t_r$  (major) = 6.11 min,  $t_r$  (minor) = 7.05 min].  $[\alpha]_D^{25} = -61.6$  ( $c = 1.00$ , EtOAc);  $^1\text{H NMR}$  (400 MHz,  $\text{CDCl}_3$ ):  $\delta$  7.72-7.61 (m, 2H), 7.14 (s, 1H), 7.08 (t,  $J = 8.0$  Hz, 1H), 7.05-6.92 (m, 8H), 6.37-6.26 (m, 3H), 4.19 (d,  $J = 16.0$  Hz, 1H), 4.07 (d,  $J = 16.0$  Hz, 1H), 3.73 (s, 3H), 3.72 (s, 3H);  $^{13}\text{C NMR}$  (100 MHz,  $\text{CDCl}_3$ ):  $\delta$  160.9, 158.6, 151.0, 148.9, 135.5, 133.3, 132.7, 132.6, 130.2, 130.0, 129.4, 128.3, 128.3, 127.7, 124.5, 117.3, 115.8, 115.4, 106.8, 103.6, 102.8, 99.8, 55.2, 55.1, 51.7; HRMS (ESI) calcd for  $\text{C}_{27}\text{H}_{26}\text{NO}_3$  ( $\text{M}+\text{H}$ ) $^+$  412.1907, found 412.1901.

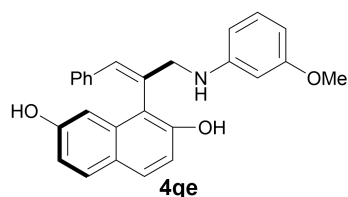

(*E*)-1-(3-((3-Methoxyphenyl)amino)-1-phenylprop-1-en-2-yl)naphthalene-2,7-diol **4qe** was obtained as a yellowish oil in 88% yield (35.0 mg) and 82% ee.  $R_f = 0.20$  (petroleum ether/ethyl acetate = 4:1). The ee value was determined by chiral stationary phase HPLC analysis [Daicel Chiralpak IC, isopropanol/hexane (15:85), 1.0 mL/min,  $\lambda = 254$  nm,  $t_r$  (major) = 6.45 min,  $t_r$  (minor) = 7.58 min].  $[\alpha]_D^{25} = -11.5$  ( $c = 1.00$ , EtOAc);  $^1\text{H NMR}$  (400 MHz,  $\text{CDCl}_3$ ):  $\delta$  7.70-7.57 (m, 2H), 7.09 (t,  $J = 8.0$  Hz, 1H), 7.06-6.95 (m, 6H), 6.95-6.88 (m, 3H), 6.37-6.24 (m, 3H), 4.08 (d,  $J = 15.6$  Hz, 1H), 3.98 (d,  $J = 15.6$  Hz, 1H), 3.73 (s, 3H);  $^{13}\text{C NMR}$  (100 MHz,  $\text{CDCl}_3$ ):  $\delta$  160.7, 154.8, 150.7, 148.8, 135.3, 133.4, 132.6, 132.2, 130.4, 130.2, 129.6, 128.3, 127.7, 124.5, 116.7, 115.4, 107.3, 106.2, 103.5, 99.9, 55.2, 51.5; HRMS (ESI) calcd for  $\text{C}_{26}\text{H}_{24}\text{NO}_3$  ( $\text{M}+\text{H}$ ) $^+$  398.1751, found 398.1737.

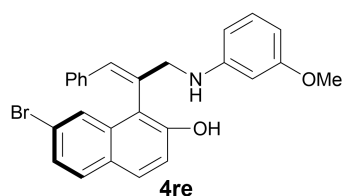

(*E*)-7-Bromo-1-(3-((3-methoxyphenyl)amino)-1-phenylprop-1-en-2-yl)naphthalen-2-ol **4re** was obtained as a yellowish oil in 80% yield (36.7 mg) and 86% ee.  $R_f = 0.30$  (petroleum ether/ethyl acetate = 4:1). The ee value was determined by chiral stationary phase HPLC

analysis [Daicel Chiralpak AD-H, isopropanol/hexane (30:70), 1.0 mL/min,  $\lambda = 254$  nm,  $t_r$  (major) = 5.92 min,  $t_r$  (minor) = 8.11 min].  $[\alpha]_D^{25} = -16.8$  ( $c = 1.00$ , EtOAc);  $^1\text{H NMR}$  (400 MHz,  $\text{CDCl}_3$ ):  $\delta$  7.83 (s, 1H), 7.73-7.55 (m, 2H), 7.37 (dd,  $J = 8.4, 2.0$  Hz, 1H), 7.20-6.97 (m, 6H), 6.96-6.83 (m, 2H), 6.39-6.24 (m, 3H), 4.19 (d,  $J = 15.2$  Hz, 1H), 4.03 (d,  $J = 15.2$  Hz, 1H), 3.73 (s, 3H);  $^{13}\text{C NMR}$  (100 MHz,  $\text{CDCl}_3$ ):  $\delta$  160.9, 151.7, 148.7, 135.2, 133.8, 133.2, 131.7, 130.3, 130.1, 129.7, 128.4, 128.4, 128.0, 127.7, 126.9, 126.0, 121.5, 118.7, 117.6, 107.0, 104.3, 100.1, 55.2, 52.4; HRMS (ESI) calcd for  $\text{C}_{26}\text{H}_{23}\text{BrNO}_2$  ( $\text{M}+\text{H}$ ) $^+$  460.0907, found 460.0906.

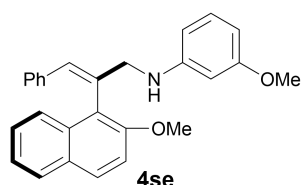

(*E*)-3-Methoxy-*N*-(2-(2-methoxynaphthalen-1-yl)-3-phenylallyl)aniline **4se** was obtained as a yellowish oil in 35% yield (13.8 mg) and 5% ee.  $R_f = 0.70$  (petroleum ether/ethyl acetate = 7:1). The ee value was determined by chiral stationary phase HPLC analysis [Daicel Chiralpak AD-H, isopropanol/hexane (10:90), 1.0 mL/min,  $\lambda = 254$  nm,  $t_r$  (minor) = 11.60 min,  $t_r$  (major) = 12.78 min].  $^1\text{H NMR}$  (400 MHz,  $\text{CDCl}_3$ ):  $\delta$  7.86 (d,  $J = 9.2$  Hz, 1H), 7.82-7.72 (m, 2H), 7.37-7.27 (m, 3H), 7.07 (t,  $J = 8.0$  Hz, 1H), 6.99 (s, 1H), 6.97-6.91 (m, 3H), 6.90-6.82 (m, 2H), 6.37-6.30 (m, 2H), 6.29-6.21 (m, 1H), 4.12 (d,  $J = 16.0$  Hz, 1H), 4.05 (d,  $J = 16.0$  Hz, 1H), 3.90 (s, 3H), 3.75 (s, 3H);  $^{13}\text{C NMR}$  (100 MHz,  $\text{CDCl}_3$ ):  $\delta$  160.9, 153.9, 149.7, 136.7, 133.9, 131.9, 129.8, 129.4, 129.3, 128.6, 128.3, 128.2, 128.0, 126.9, 126.7, 124.3, 123.9, 122.4, 113.6, 106.2, 102.5, 98.9, 56.6, 55.1, 51.3; HRMS (ESI) calcd for  $\text{C}_{27}\text{H}_{26}\text{NO}_2$  ( $\text{M}+\text{H}$ ) $^+$  396.1958, found 396.1958.

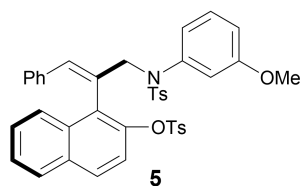

(*E*)-1-(3-((*N*-(3-methoxyphenyl)-4-methylphenyl)sulfonamido)-1-phenylprop-1-en-2-yl)naphthalen-2-yl 4-methylbenzenesulfonate **5** was obtained as a white solid in 72% yield (49.6 mg) and 85% ee.  $R_f = 0.50$  (petroleum ether/ethyl acetate = 5:1). The ee value was determined by chiral stationary phase HPLC analysis [Daicel Chiralpak AD-H, isopropanol/hexane (30:70), 1.0 mL/min,  $\lambda = 254$  nm,  $t_r$  (minor) = 16.25 min,  $t_r$  (major) = 23.11 min].  $[\alpha]_D^{25} = -20.1$  ( $c = 1.00$ , EtOAc); m.p. 58-59 °C;  $^1\text{H NMR}$  (400 MHz,  $\text{CDCl}_3$ ):  $\delta$  7.83-7.76 (m, 2H), 7.58 (d,  $J = 8.8$  Hz, 1H), 7.53 (d,  $J = 8.4$  Hz, 2H), 7.49-7.41 (m, 3H), 7.41-7.35 (m, 1H), 7.23-7.14 (m, 4H), 7.04 (s, 1H), 6.99 (d,  $J = 7.6$  Hz, 2H), 6.95-6.89 (m, 1H), 6.86-6.78 (m, 3H), 6.70-6.65



(m, 1H), 6.61 (t,  $J = 2.4$  Hz, 1H), 6.56-6.49 (m, 2H), 4.73 (dd,  $J = 17.2, 1.6$  Hz, 1H), 4.42 (dd,  $J = 17.2, 1.6$  Hz, 1H), 3.65 (s, 3H), 2.38 (s, 3H), 2.25 (s, 3H);  $^{13}\text{C}$  NMR (100 MHz,  $\text{CDCl}_3$ ):  $\delta$  159.8, 145.1, 144.6, 143.6, 141.1, 135.4, 135.2, 132.9, 132.0, 131.7, 131.4, 129.9, 129.5, 129.5, 129.4, 129.1, 128.6, 128.2, 128.1, 127.9, 127.8, 127.3, 127.1, 126.3, 125.9, 121.0, 120.5, 114.4, 114.1, 56.4, 55.3, 21.7, 21.6; HRMS (ESI) calcd for  $\text{C}_{40}\text{H}_{35}\text{NNaO}_6\text{S}_2$  ( $\text{M}+\text{Na}$ ) $^+$  712.1798, found 712.1796.

### Investigation on the Enantiomerization Barrier of 4ae

The reaction was conducted at 1 mg/mL concentration in a sealed tube and heated at the specified temperature. The change in enantiomeric excess over time was determined by HPLC. The barrier to rotation for 4ae was obtained by kinetic of racemization of an enantiomer.

This data was plotted as ( $\ln[\text{ee}_0/\text{ee}_t]$ ) versus time (seconds). The gradient of this graph gives the racemization constant ( $k_{\text{racemization}} = 2 \times k_{\text{enantiomerization}}$ ) at the specified temperature. The barrier to rotation,  $\Delta G^\ddagger_{\text{enantiomerization}}$ , was calculated using the following Eyring equation,  $R$  = Gas constant =  $8.3145 \text{ J}\cdot\text{K}^{-1}\cdot\text{mol}^{-1}$ ,  $h$  = Planck constant =  $6.62608 \times 10^{-34} \text{ J}\cdot\text{s}$ ,  $k_B$  = Boltzmann constant =  $1.38066 \times 10^{-23} \text{ J}\cdot\text{K}^{-1}$ , and  $T_1$  = temperature racemization study was conducted at, in Kelvin.

$$\Delta G^\ddagger_{\text{enantiomerization}} = RT_1 \ln \frac{k_B T_1}{h k_{\text{enantiomerization}}}$$

Racemization of 4ae in *i*-PrOH at 60 °C

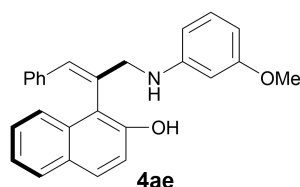

**Table S4. Investigation on the enantiomerization barrier of 4ae**

| Time (seconds) | Enantiomeric Excess (ee) | First Order Racemization ( $\ln[\text{ee}_0/\text{ee}_t]$ ) |
|----------------|--------------------------|-------------------------------------------------------------|
| 0              | 86.78                    | 0.00000                                                     |
| 3600           | 83.42                    | 0.03949                                                     |
| 7200           | 80.76                    | 0.07189                                                     |
| 10800          | 78.70                    | 0.09773                                                     |
| 14400          | 77.04                    | 0.11905                                                     |
| 21600          | 73.20                    | 0.17018                                                     |
| 36000          | 65.40                    | 0.28285                                                     |
| 64800          | 53.30                    | 0.48744                                                     |
| 86400          | 45.68                    | 0.64172                                                     |

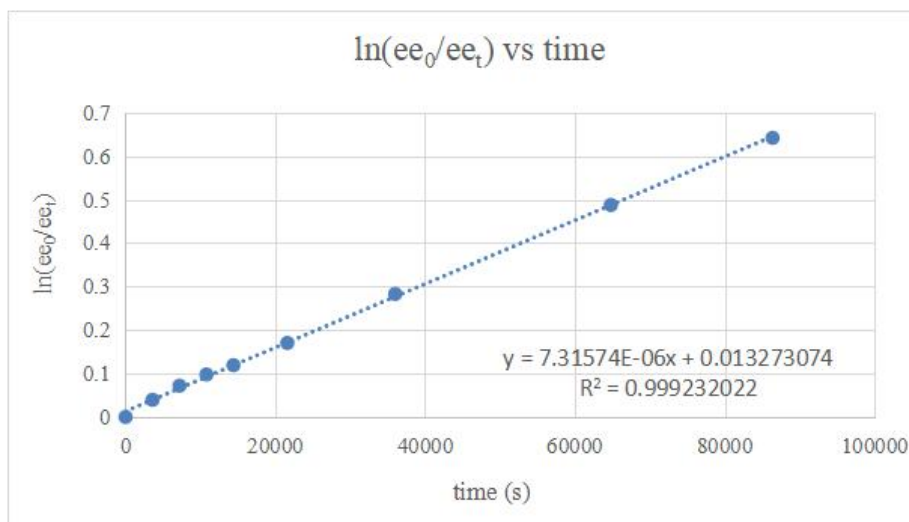

$$k_{\text{racemization}} (60\text{ }^{\circ}\text{C}) = 7.31574 \times 10^{-6} \text{ s}^{-1}$$

$$k_{\text{enantiomerization}} (60\text{ }^{\circ}\text{C}) = 3.65787 \times 10^{-6} \text{ s}^{-1}$$

$$\Delta G^{\ddagger}_{\text{enantiomerization}} = 116.6 \text{ KJ/mol} = 27.9 \text{ kcal/mol}$$

## References

- 1 (a) P. Wipf and J.-K. Jung, Formal Total Synthesis of (+)-Diepoxin  $\sigma$ , *J. Org. Chem.*, 2000, **65**, 6319; (b) H.-B. Yu, Q.-S. Hu and L. Pu, The First Optically Active BINOL–BINAP Copolymer Catalyst: Highly Stereoselective Tandem Asymmetric Reactions, *J. Am. Chem. Soc.*, 2000, **122**, 6500; (c) D. Uraguchi and M. Terada, Chiral Brønsted Acid-Catalyzed Direct Mannich Reactions via Electrophilic Activation, *J. Am. Chem. Soc.*, 2004, **126**, 5356.
- 2 X. Song, A. Song, F. Zhang, H.-X. Li and W. Wang, Direct stereoselective  $\alpha$ -arylation of unmodified enals using an organocatalytic cross-coupling-like reaction, *Nat. Commun.*, 2011, **2**, 524.
- 3 M.-H. Larraufie, R. Pellet, L. Fensterbank, J.-P. Goddard, E. Lacôte, M. Malacria and C. Ollivier, Visible-Light-Induced Photoreductive Generation of Radicals from Epoxides and Aziridines, *Angew. Chem., Int. Ed.*, 2011, **50**, 4463.

## NMR Spectra of 1

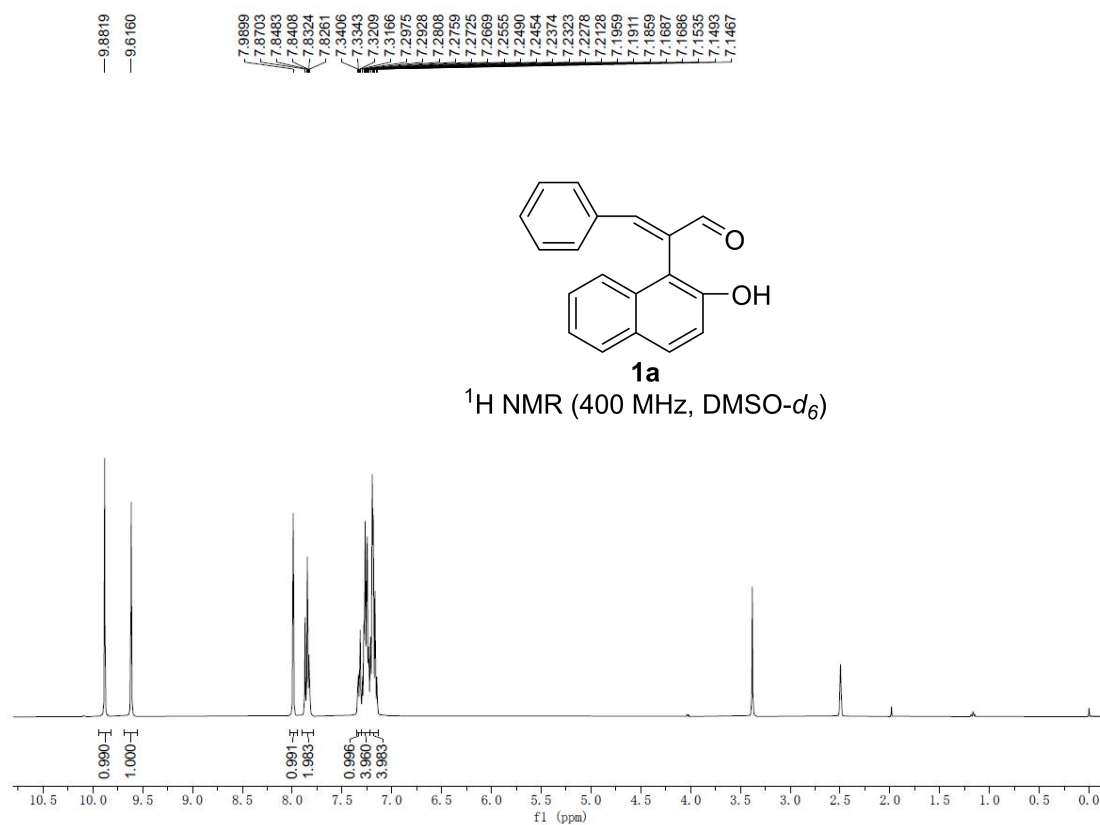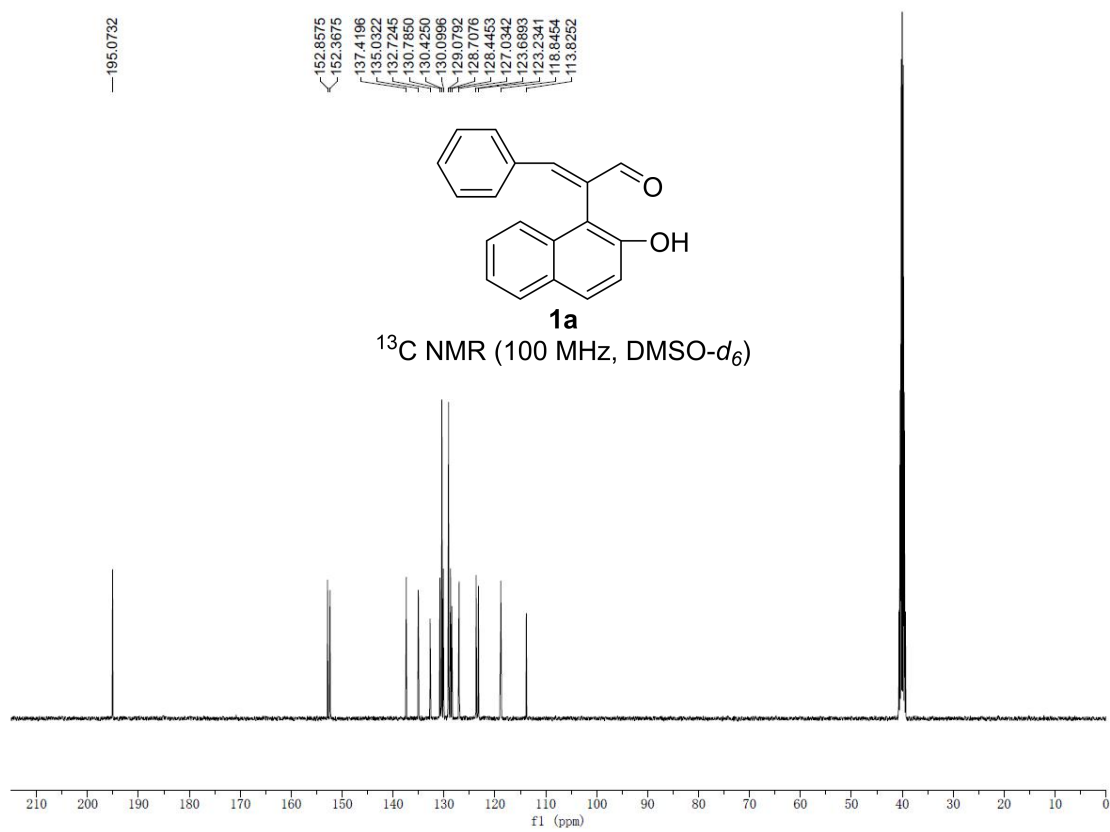

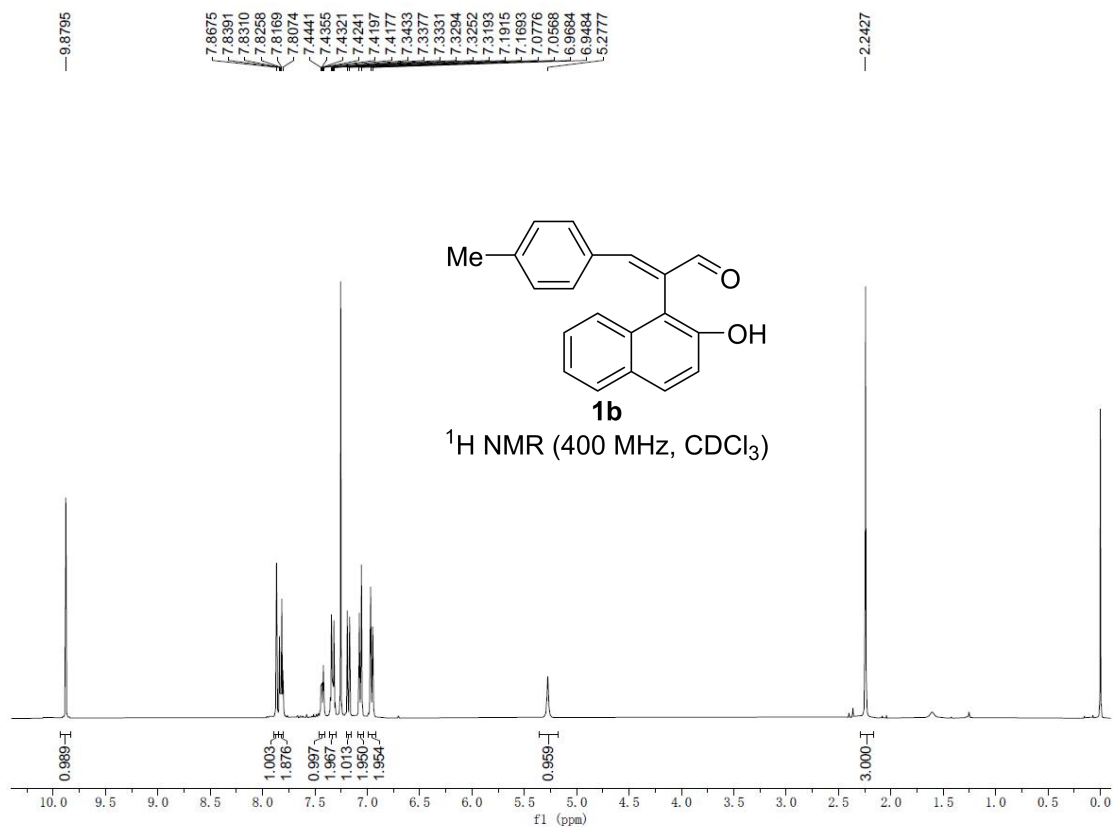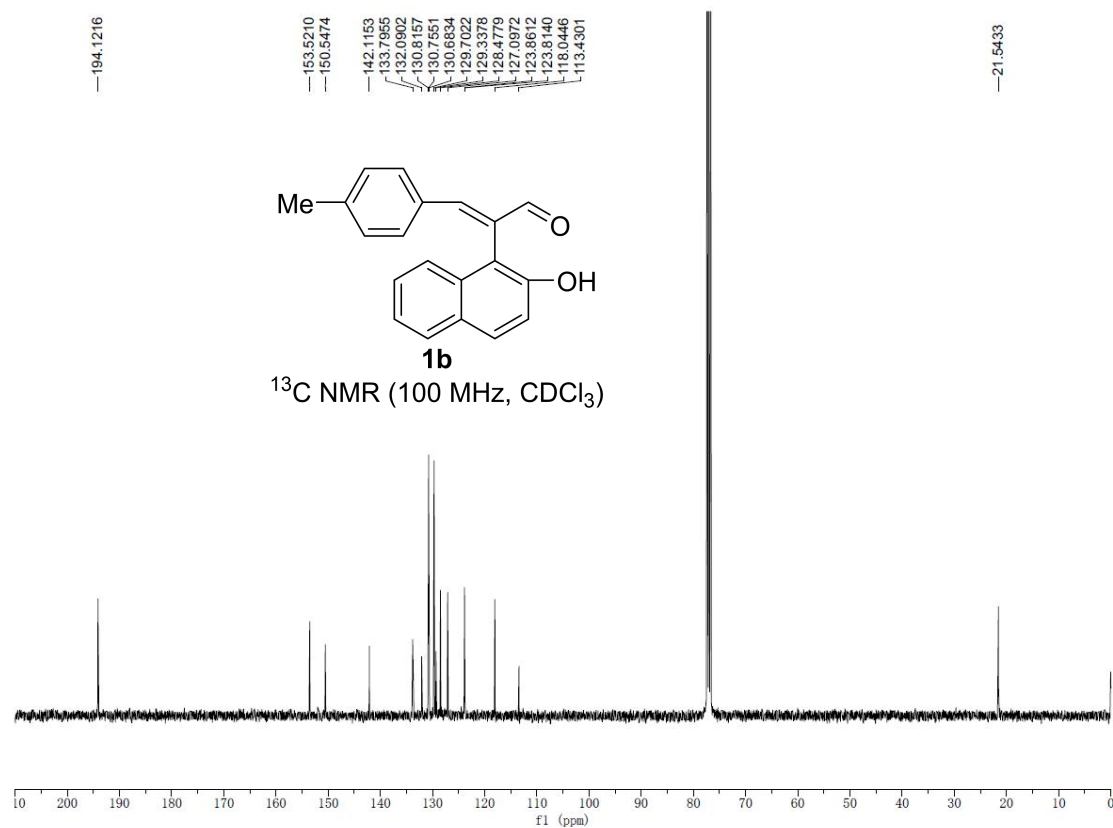

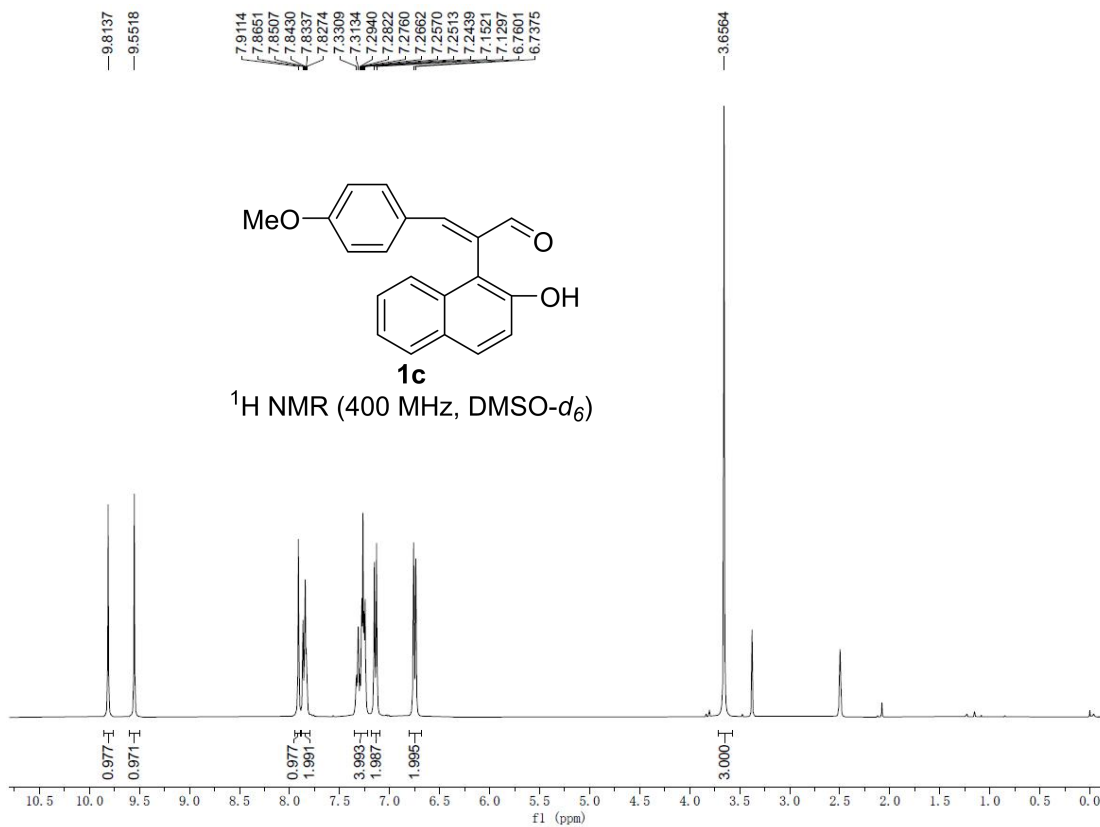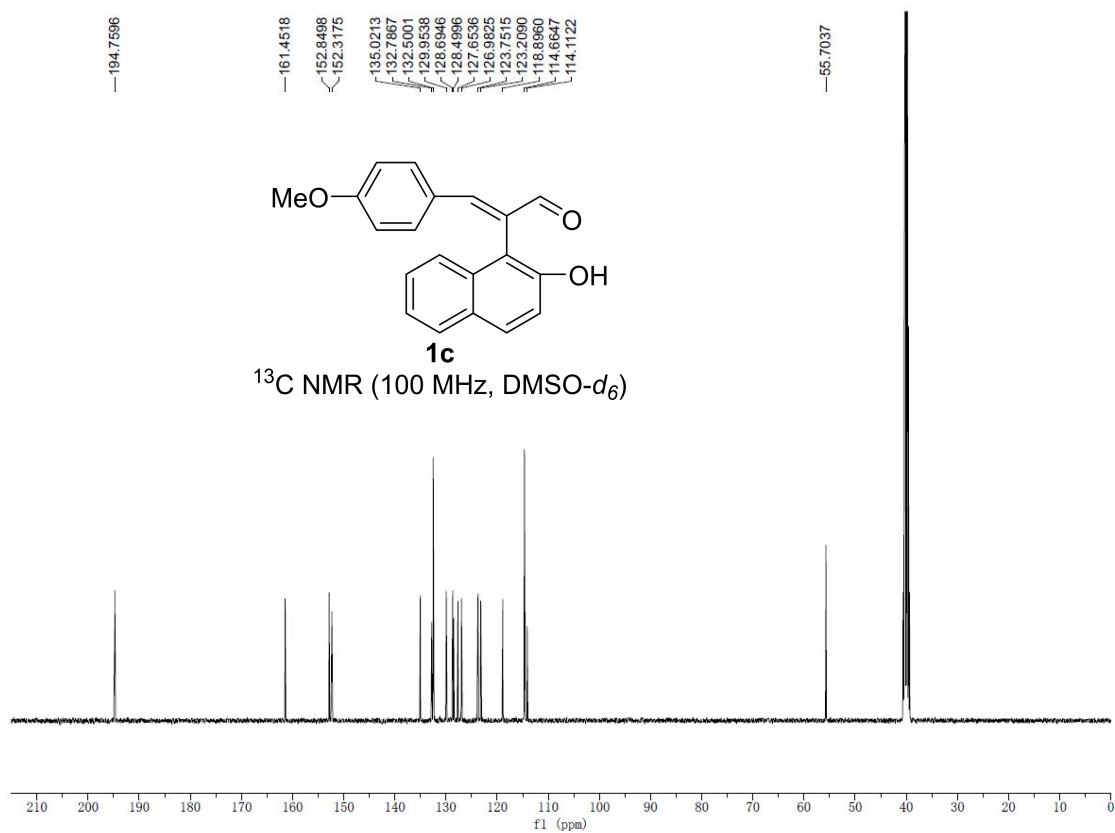

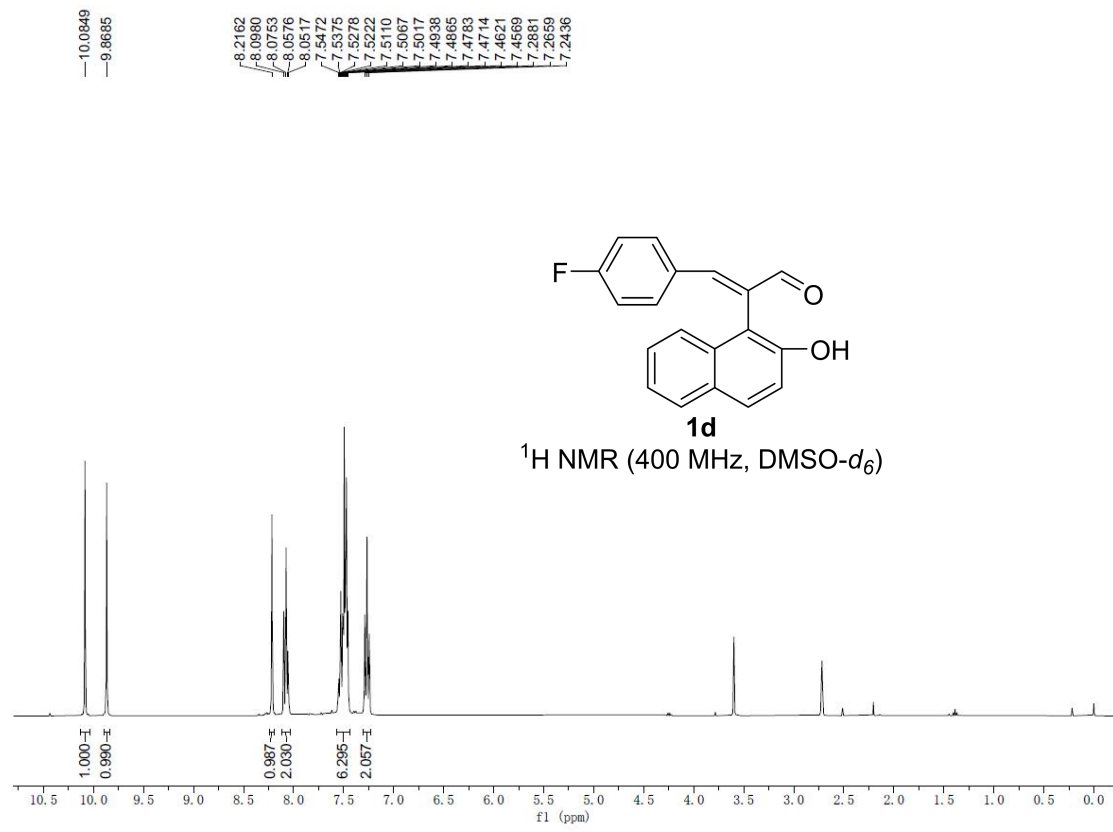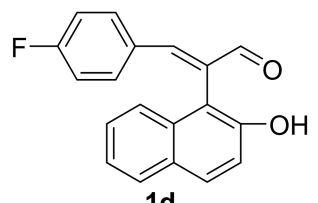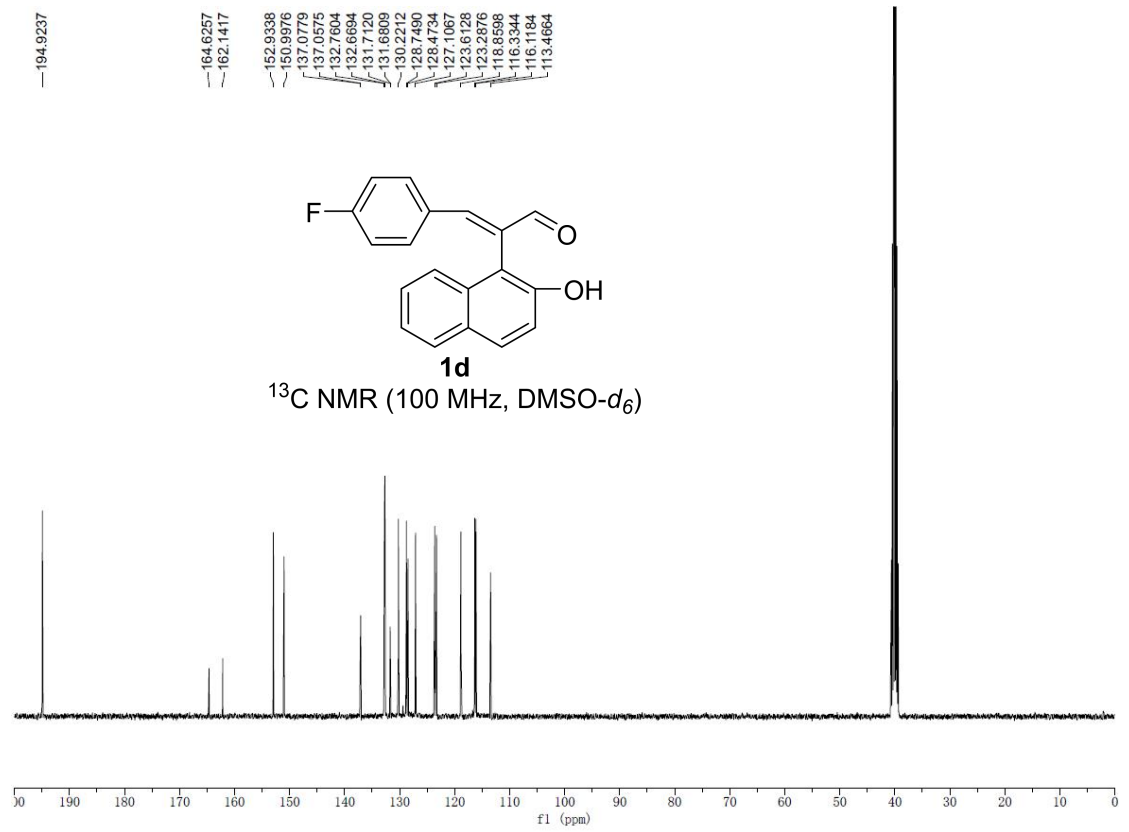

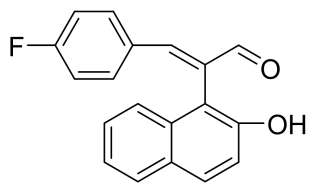

**1d**  
<sup>19</sup>F NMR (376 MHz, DMSO-*d*<sub>6</sub>)

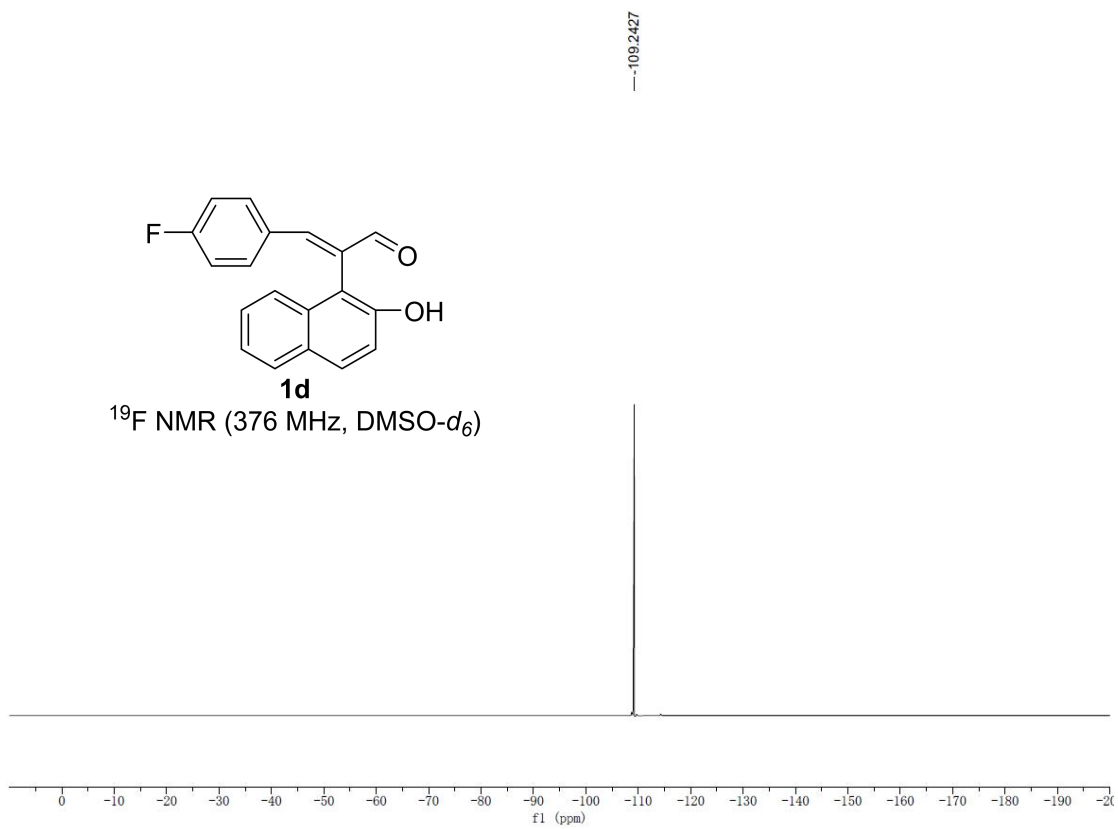

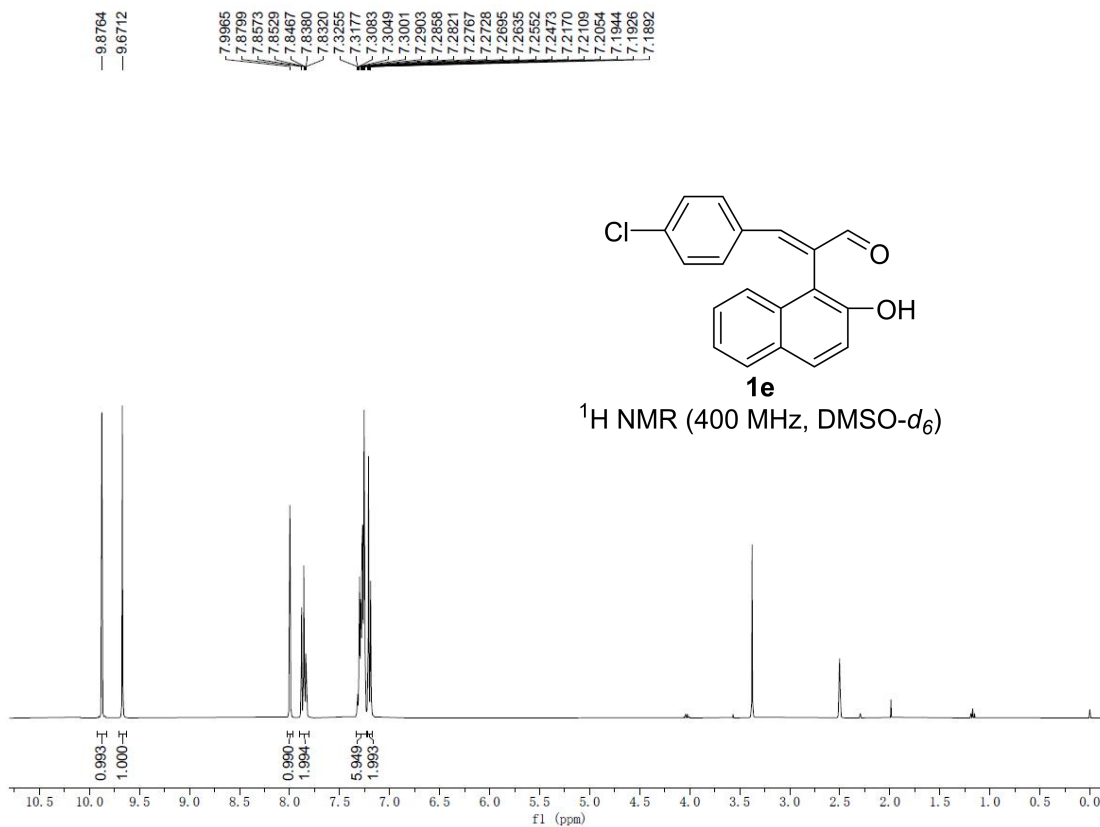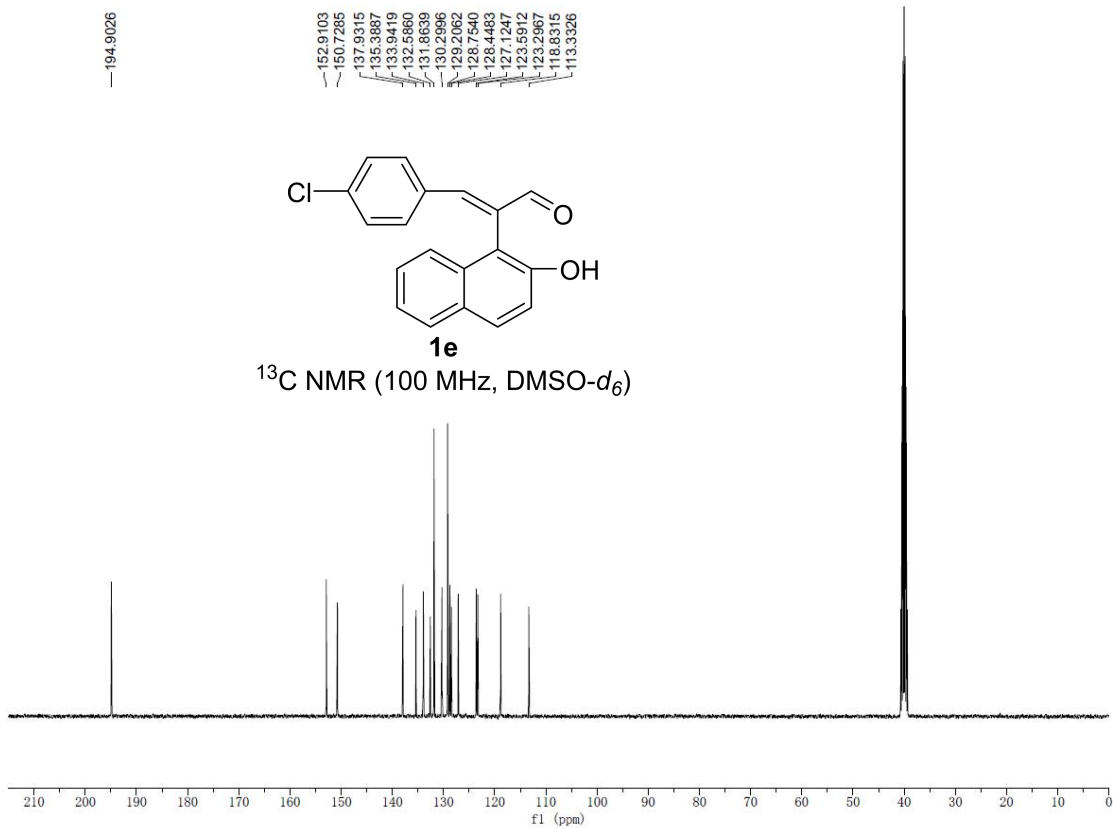



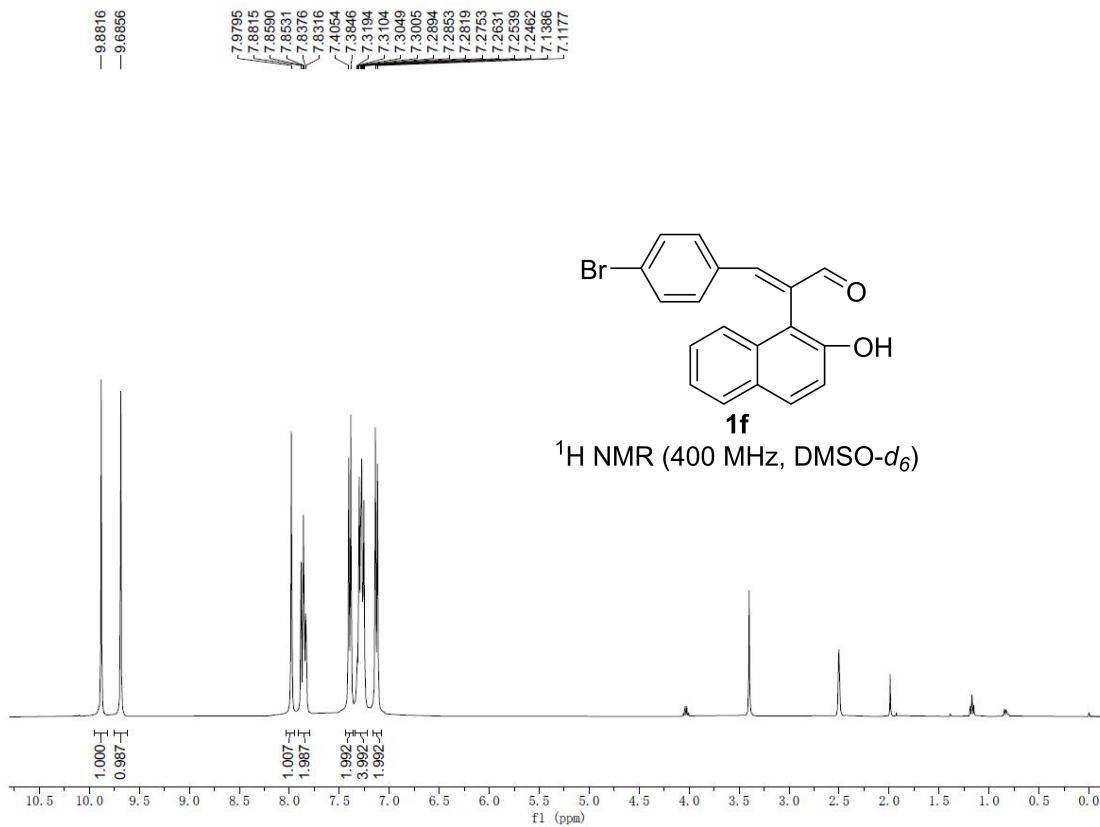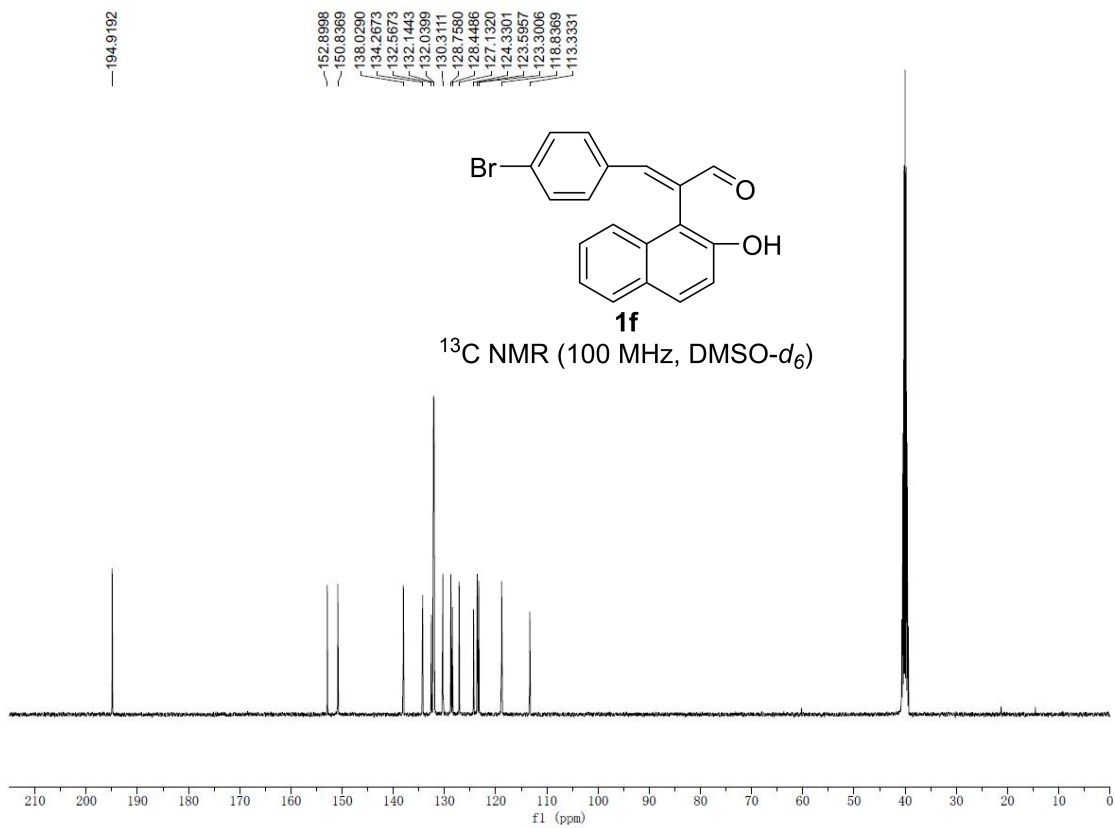

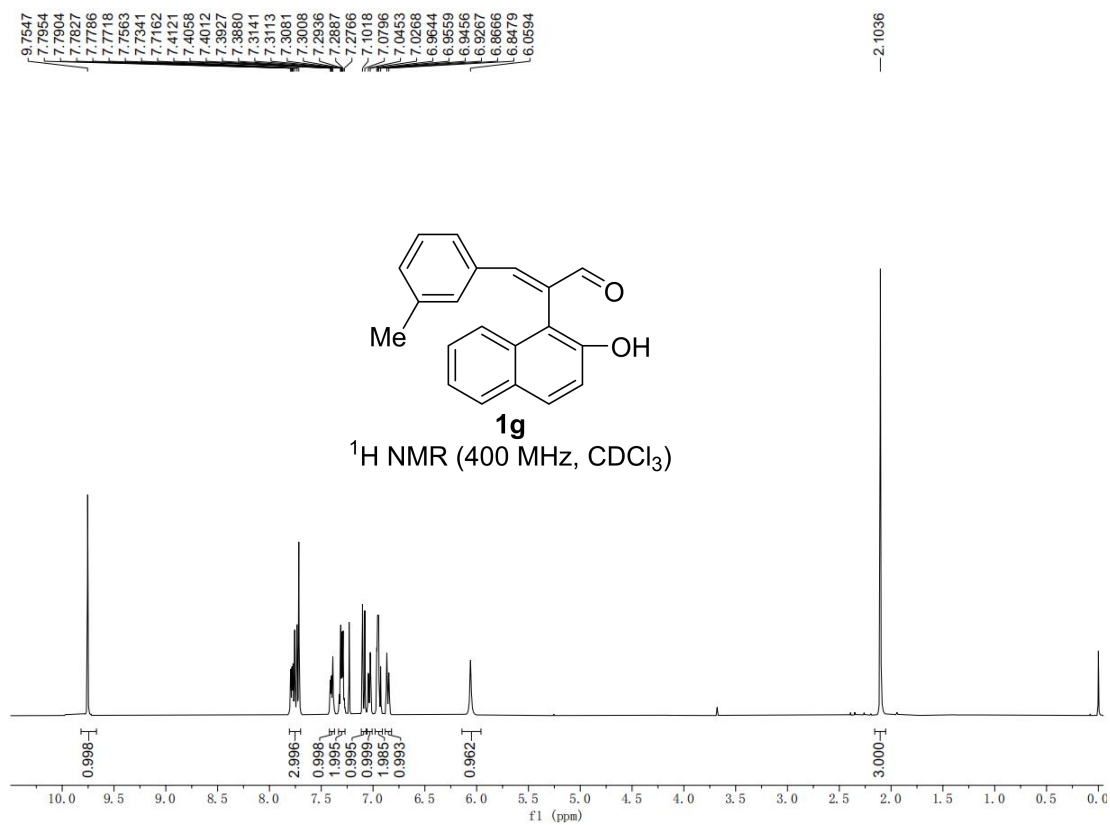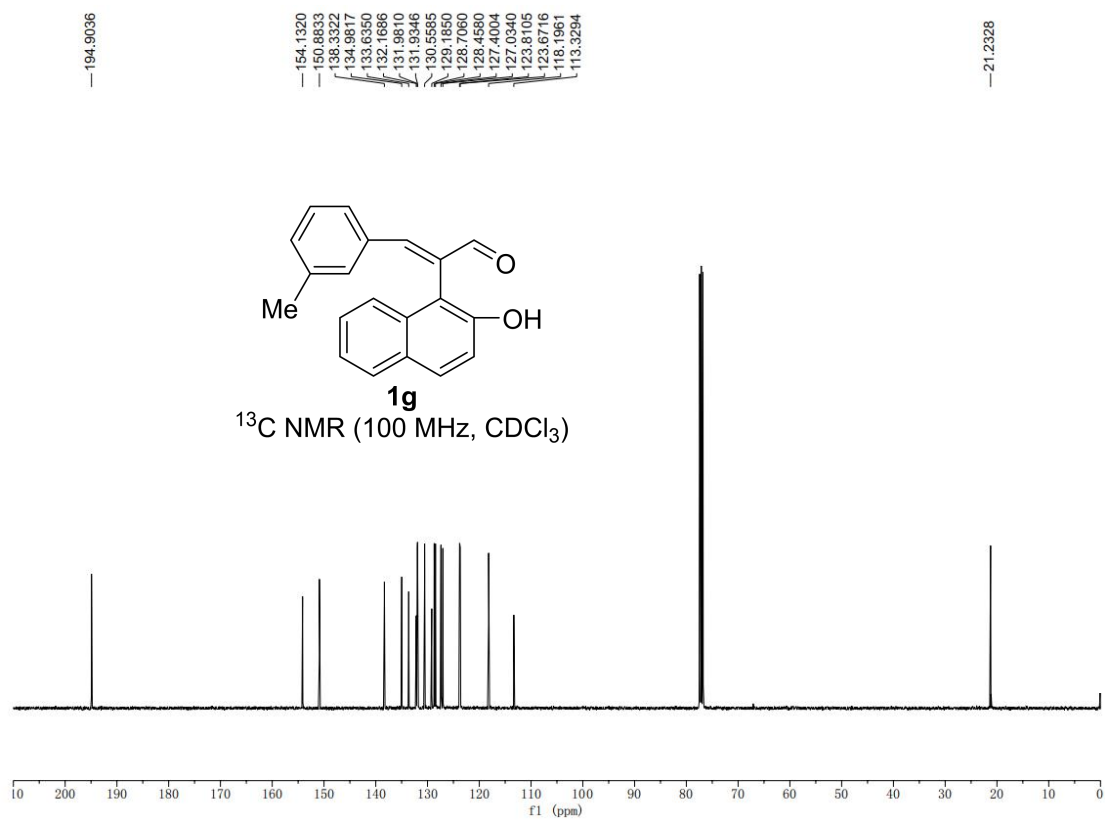

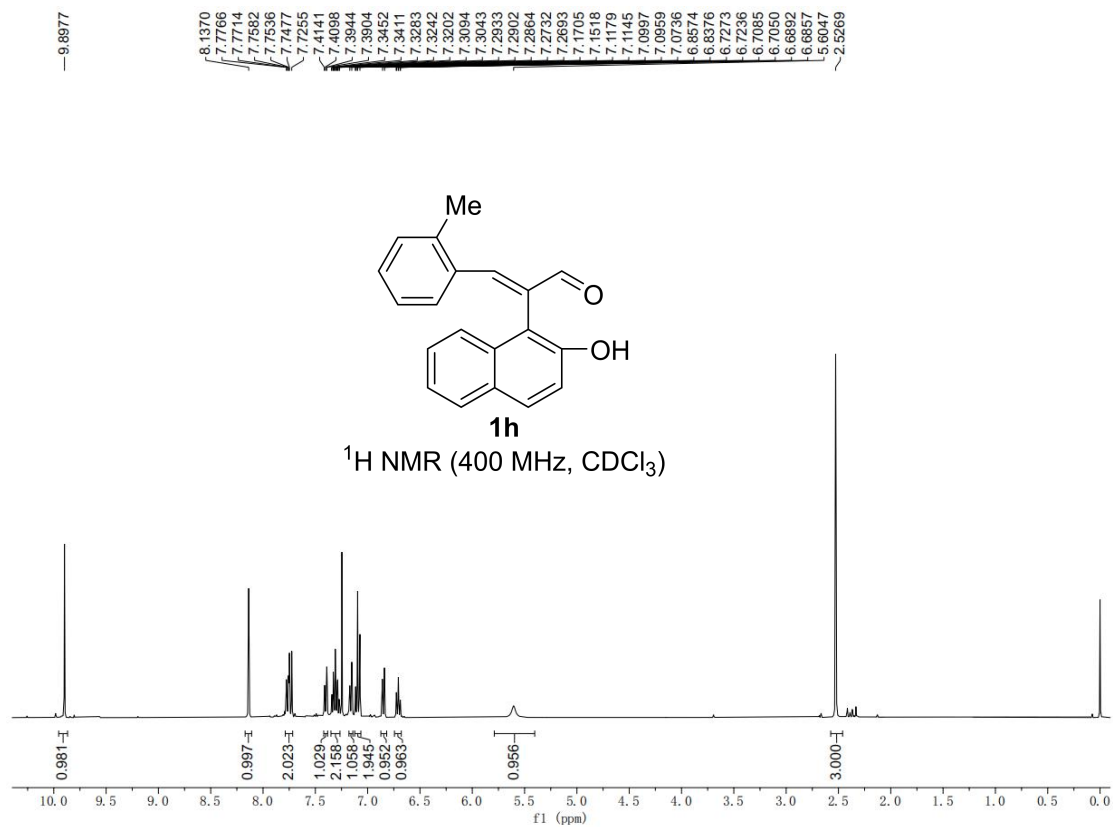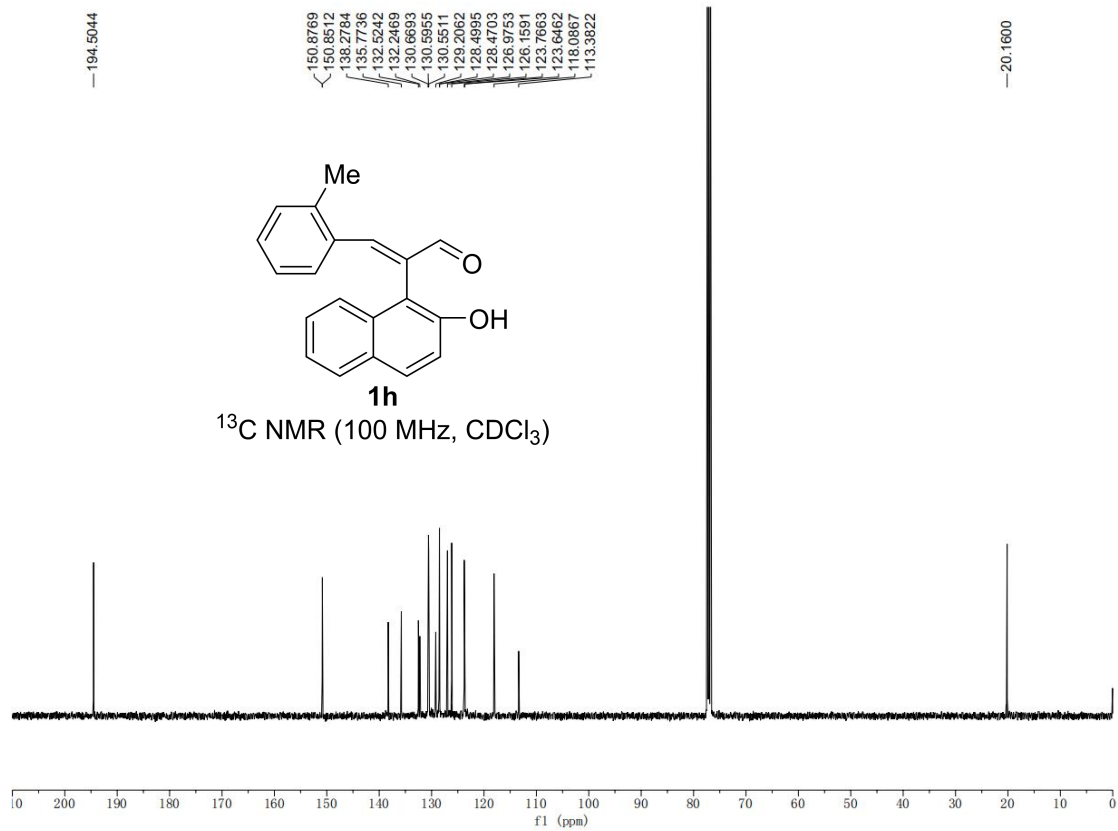

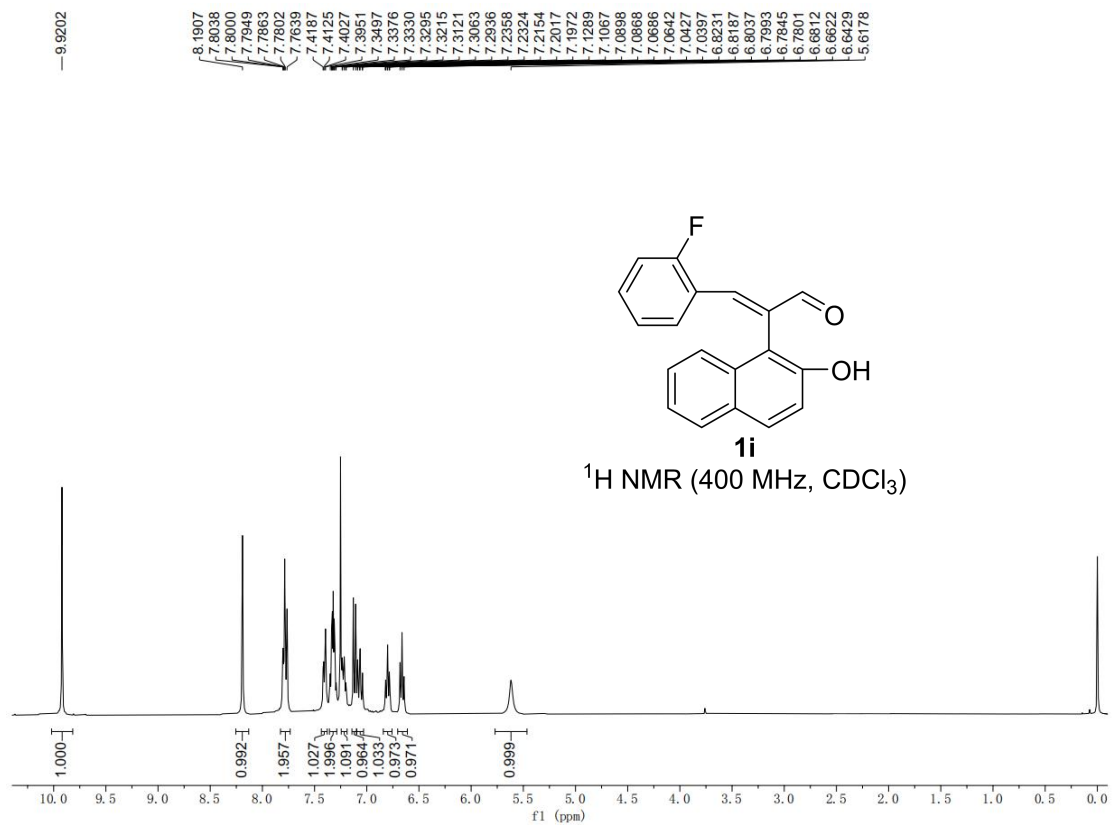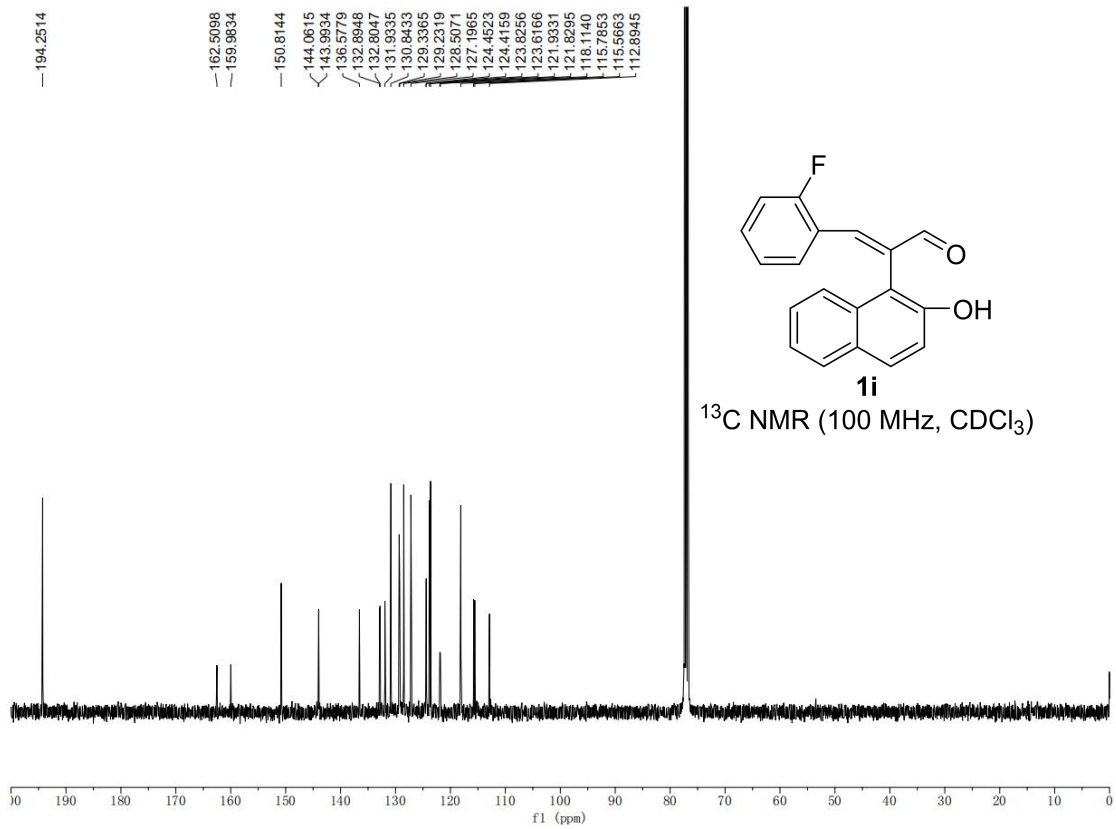

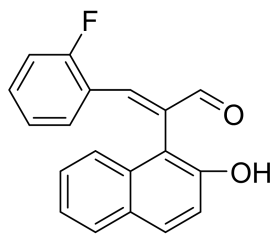

**1i**  
 $^{19}\text{F}$  NMR (376 MHz,  $\text{DMSO-}d_6$ )

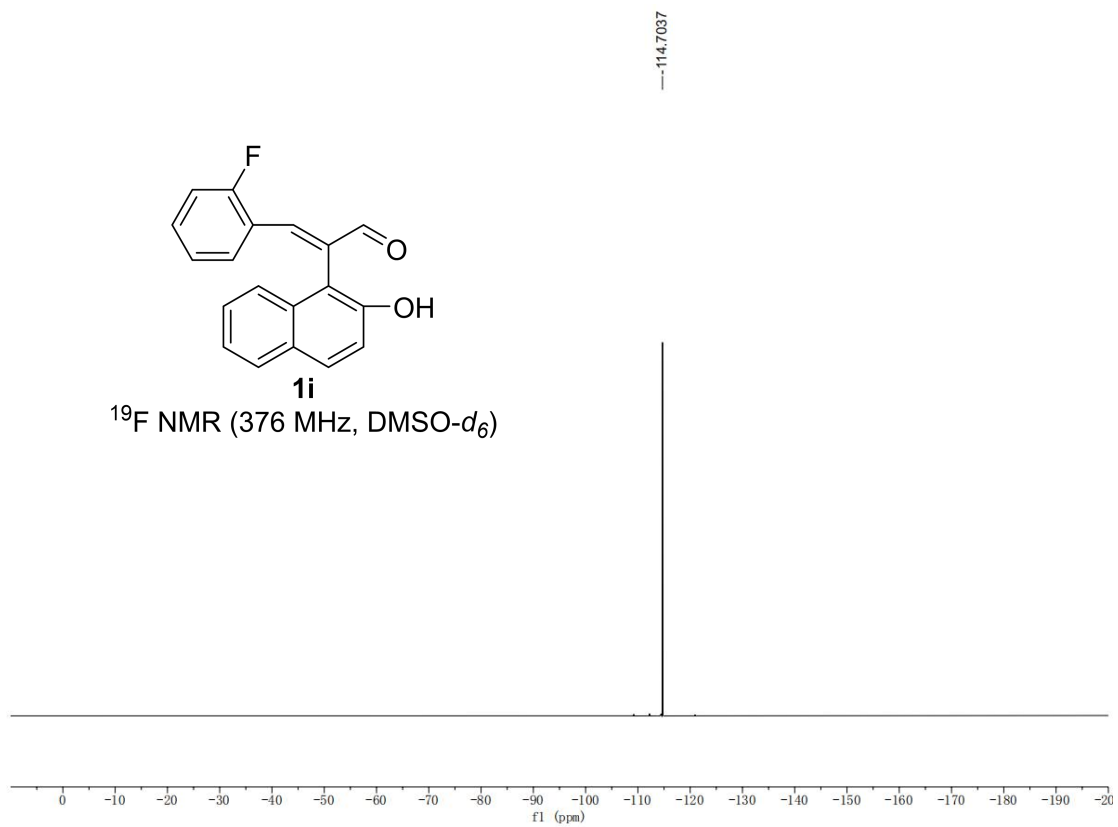

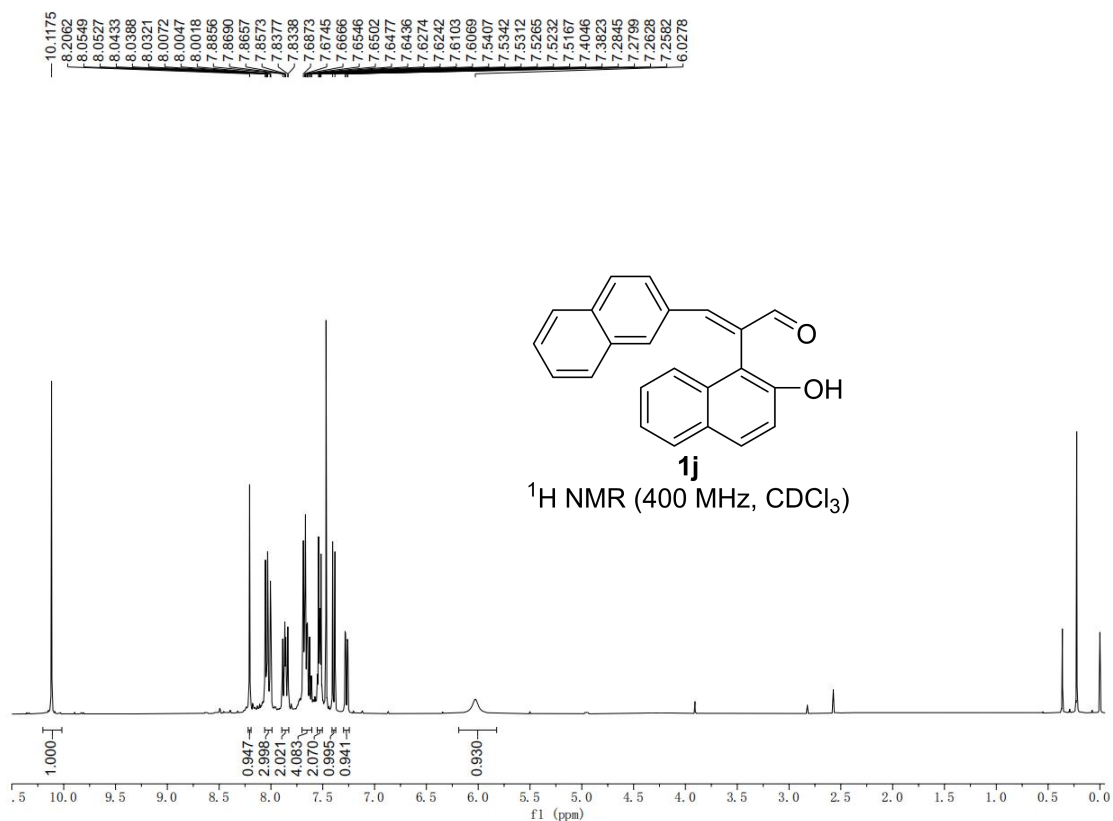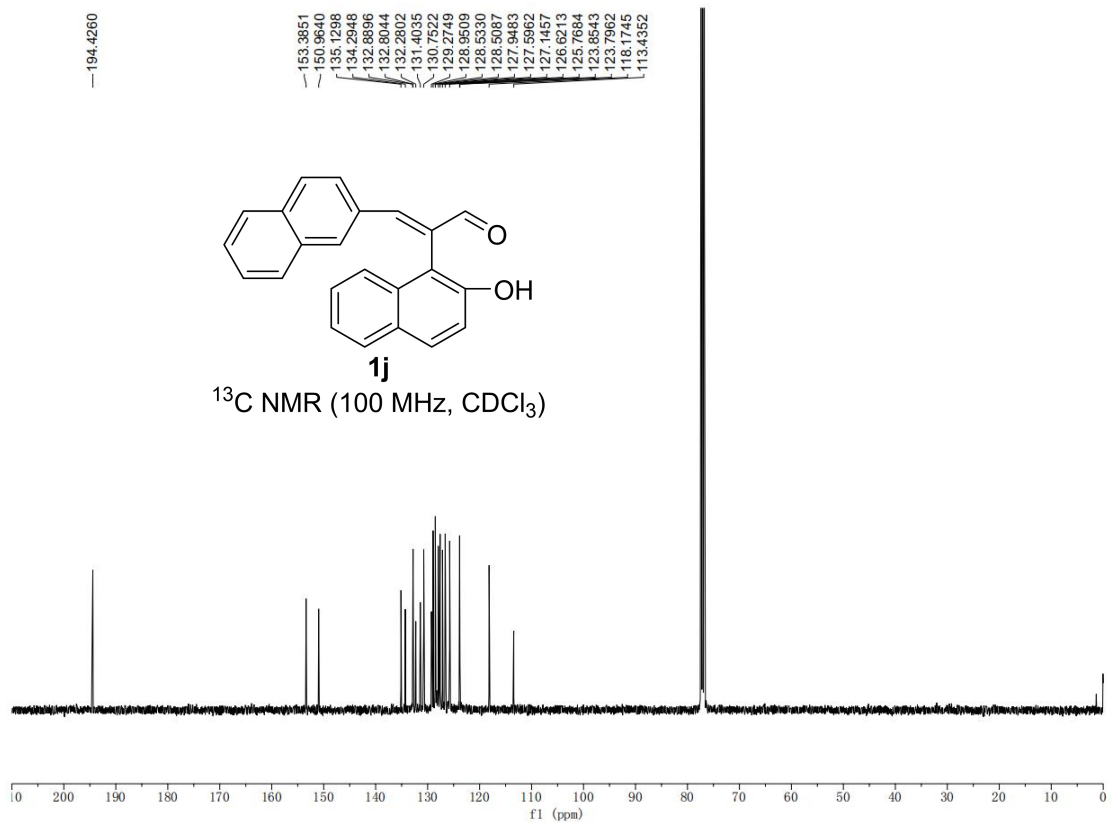

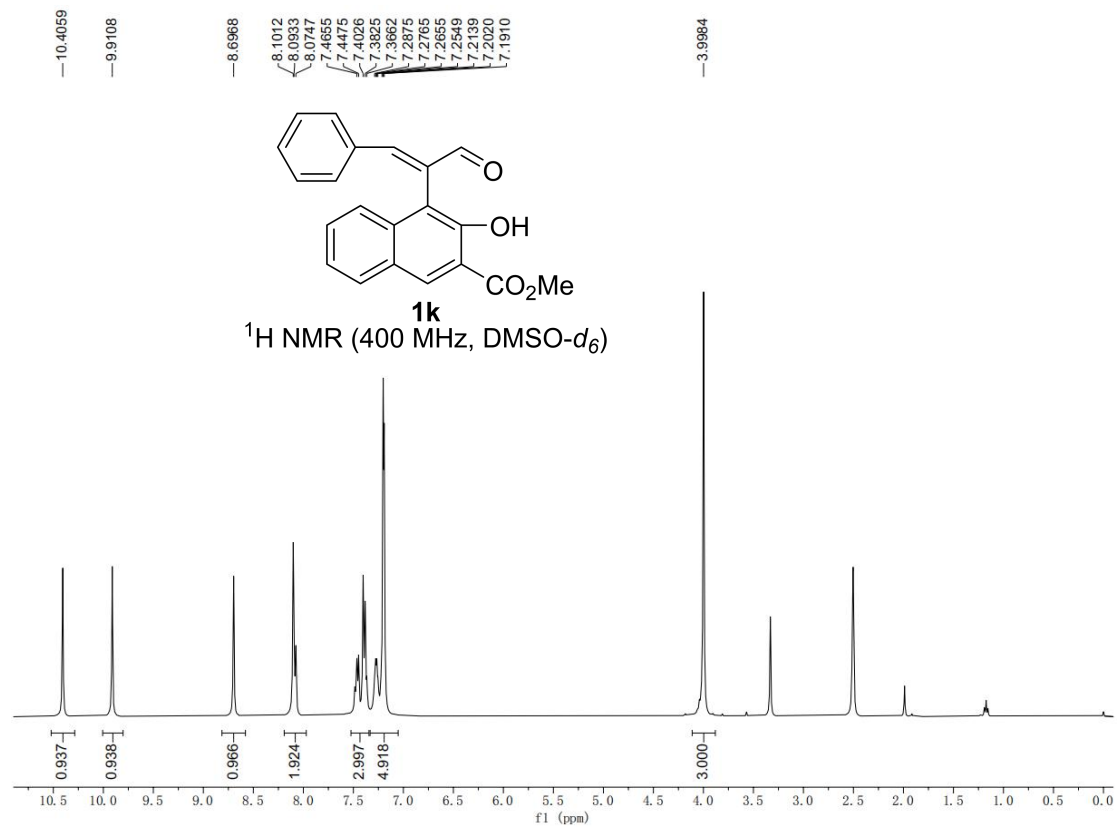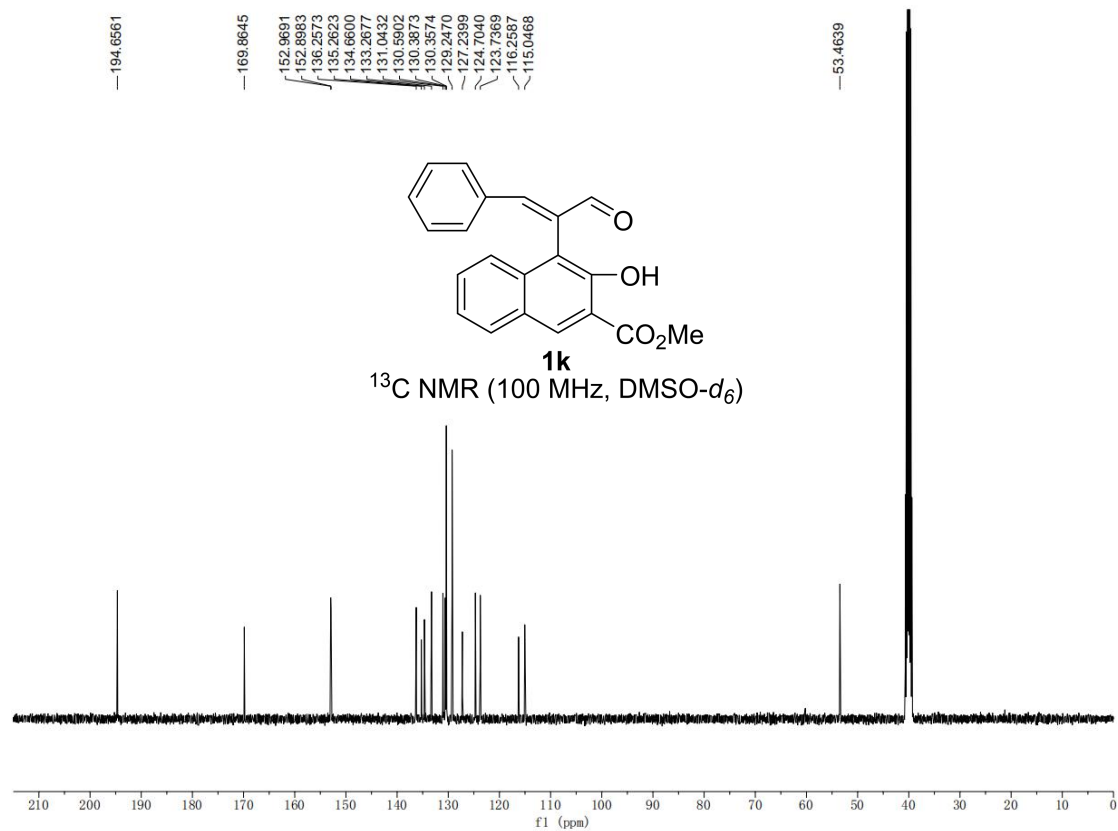

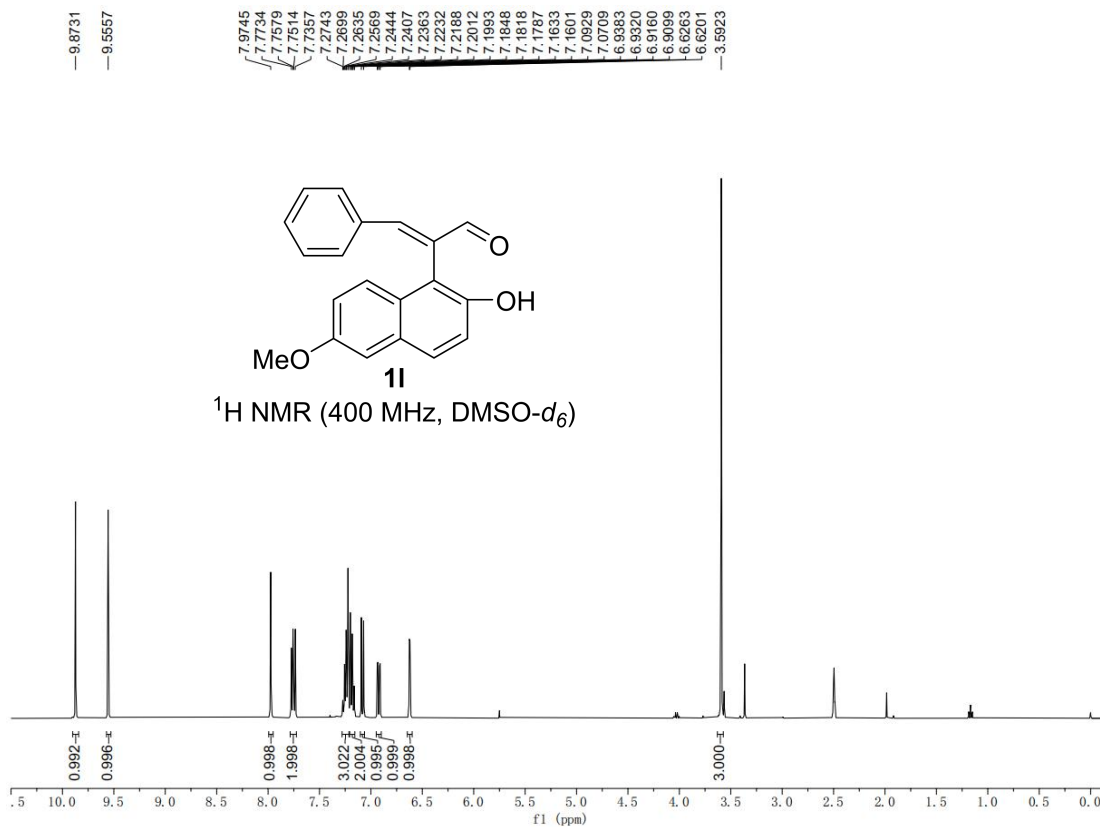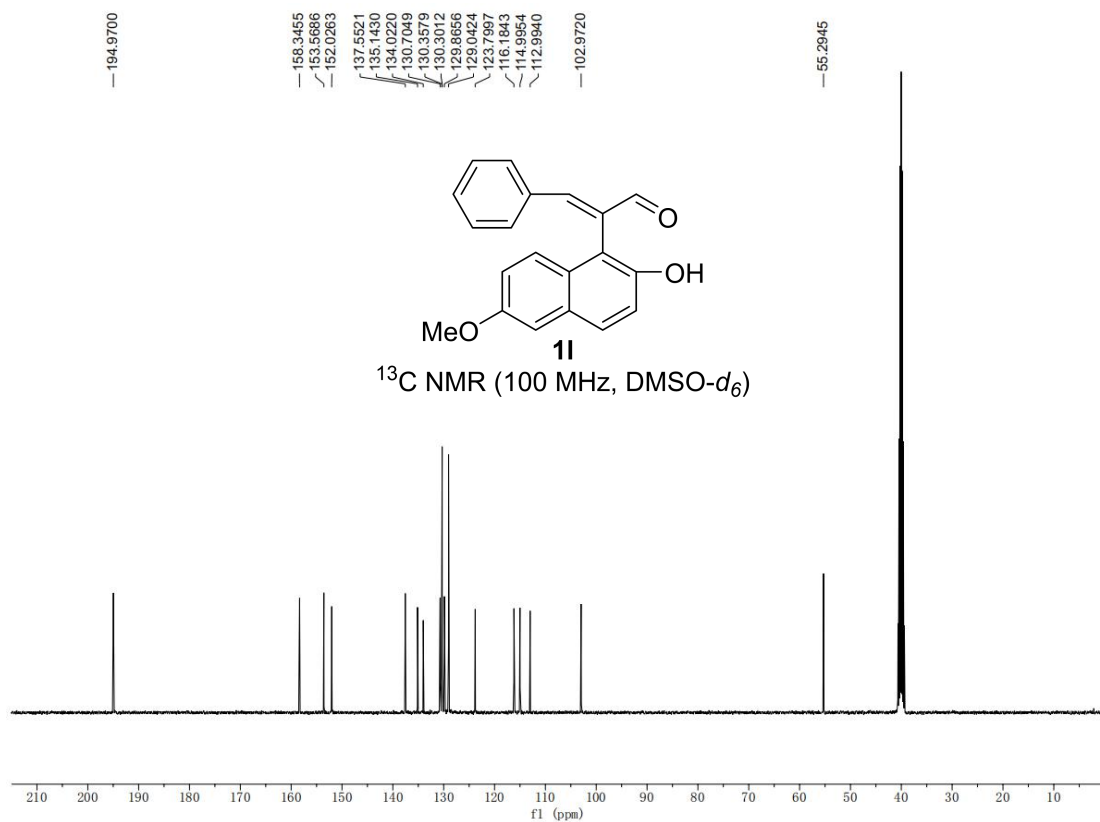



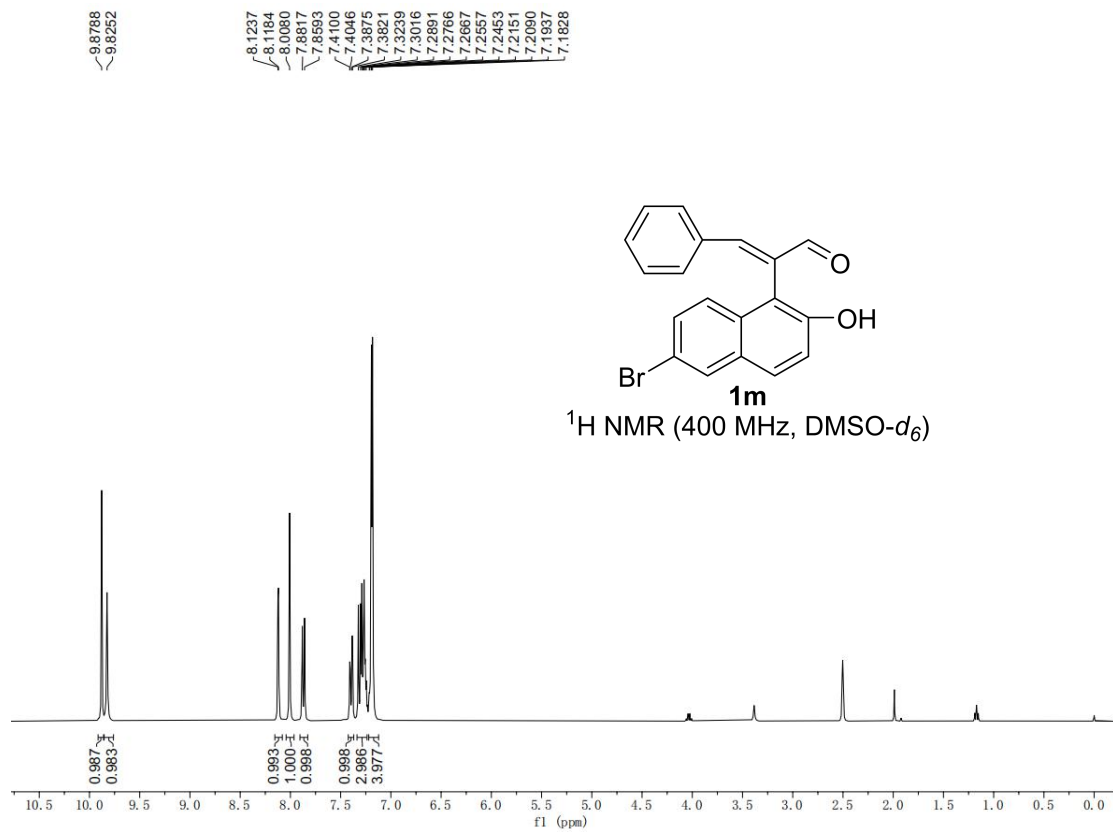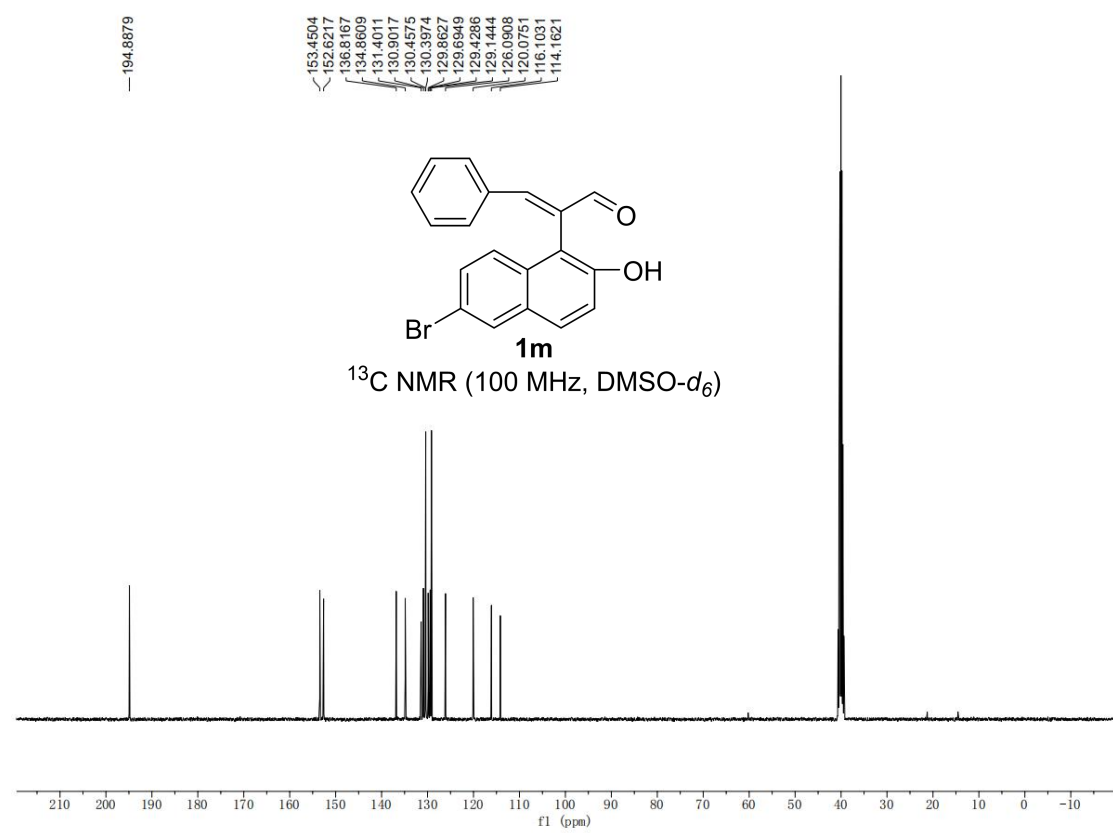

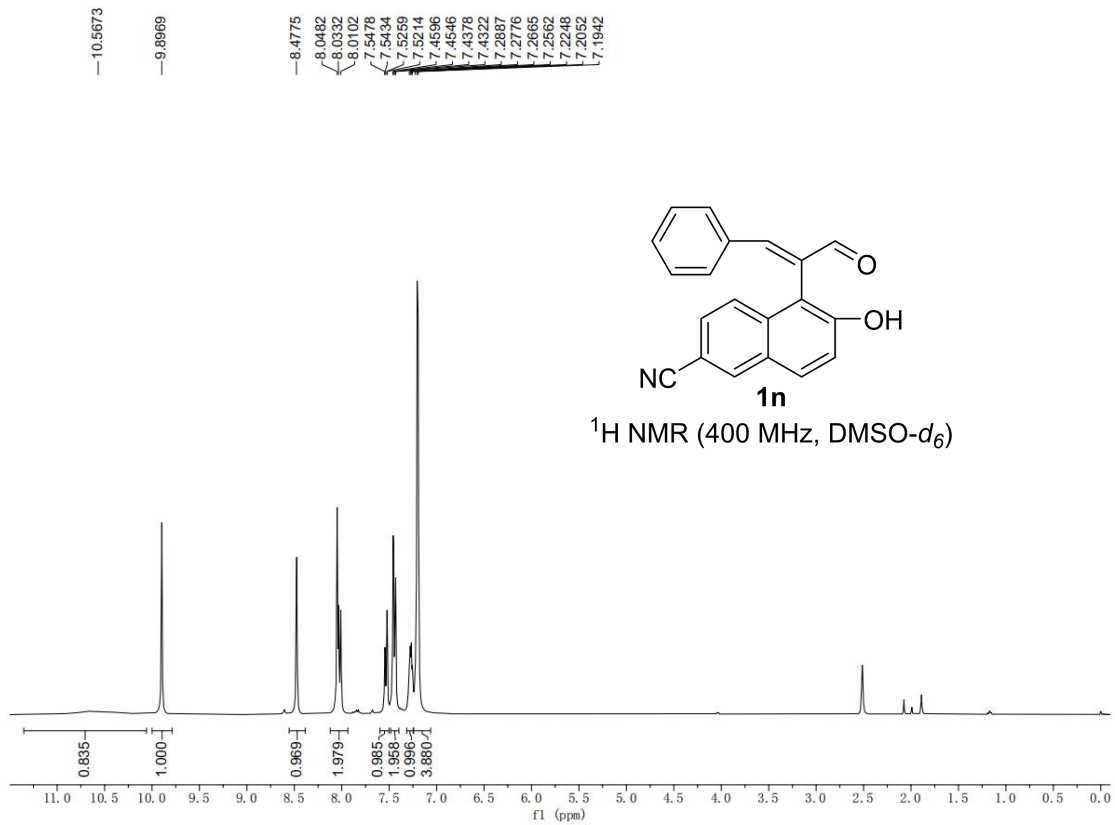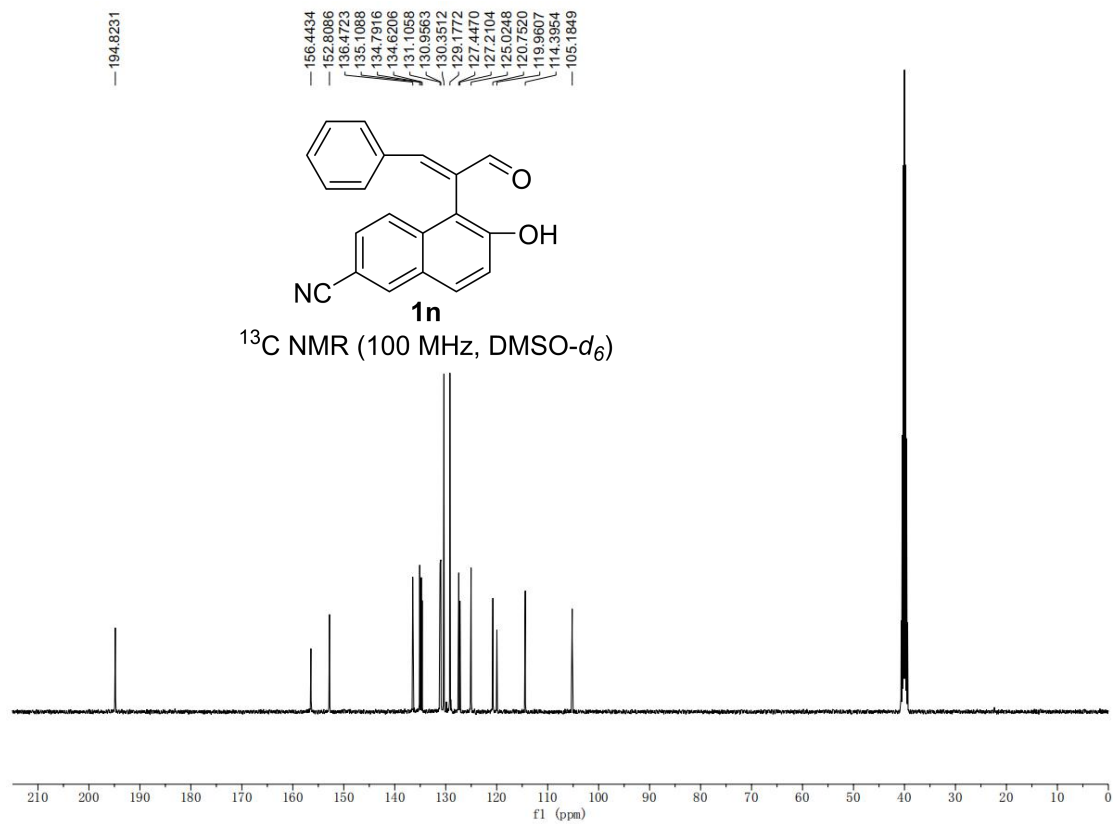

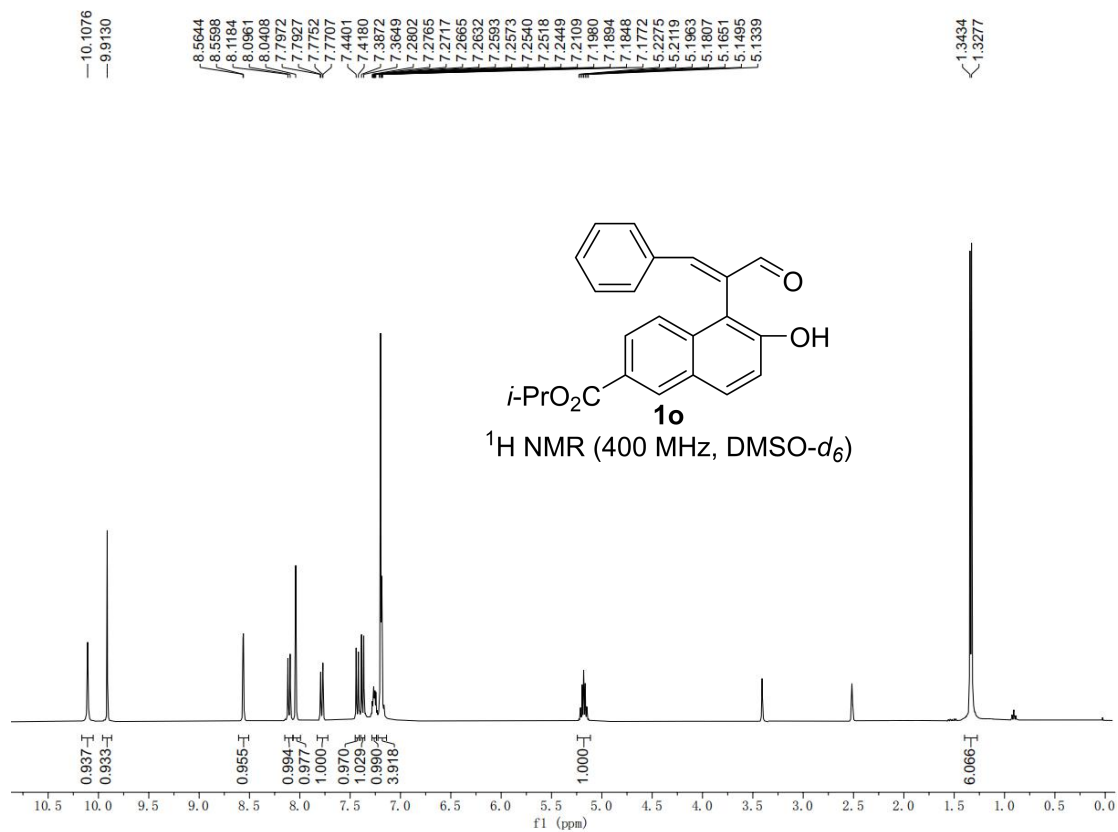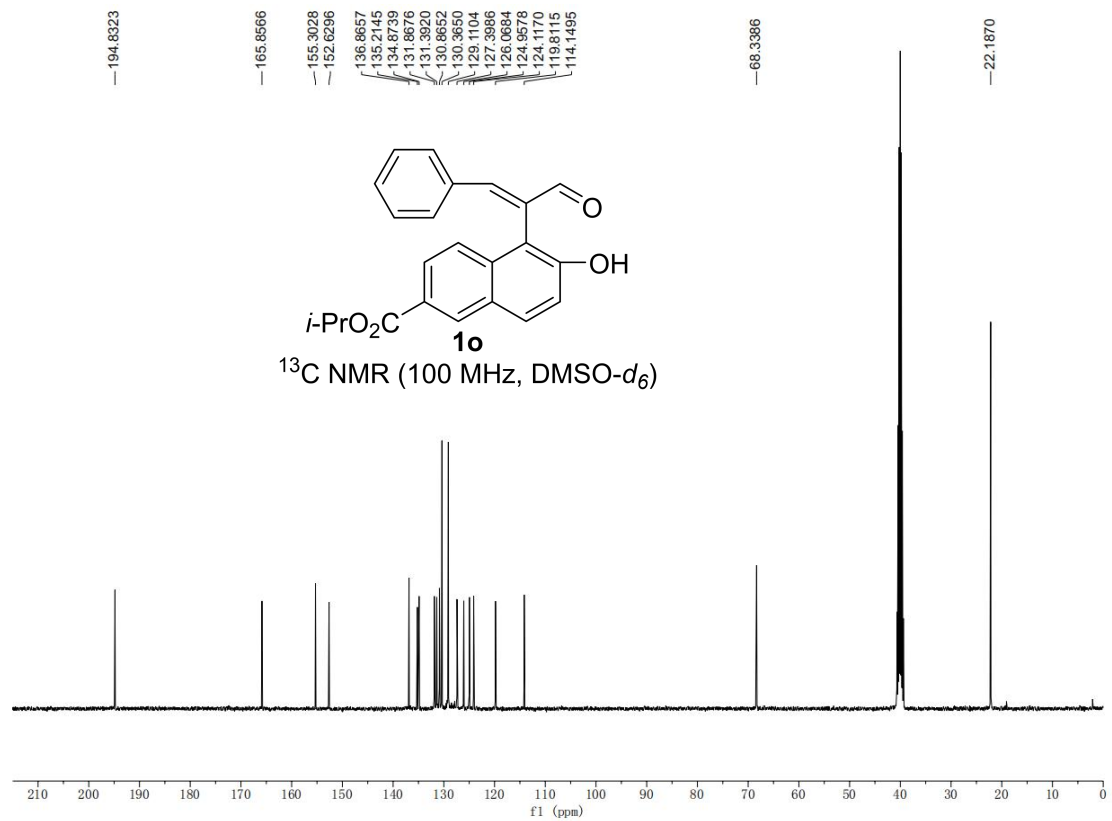

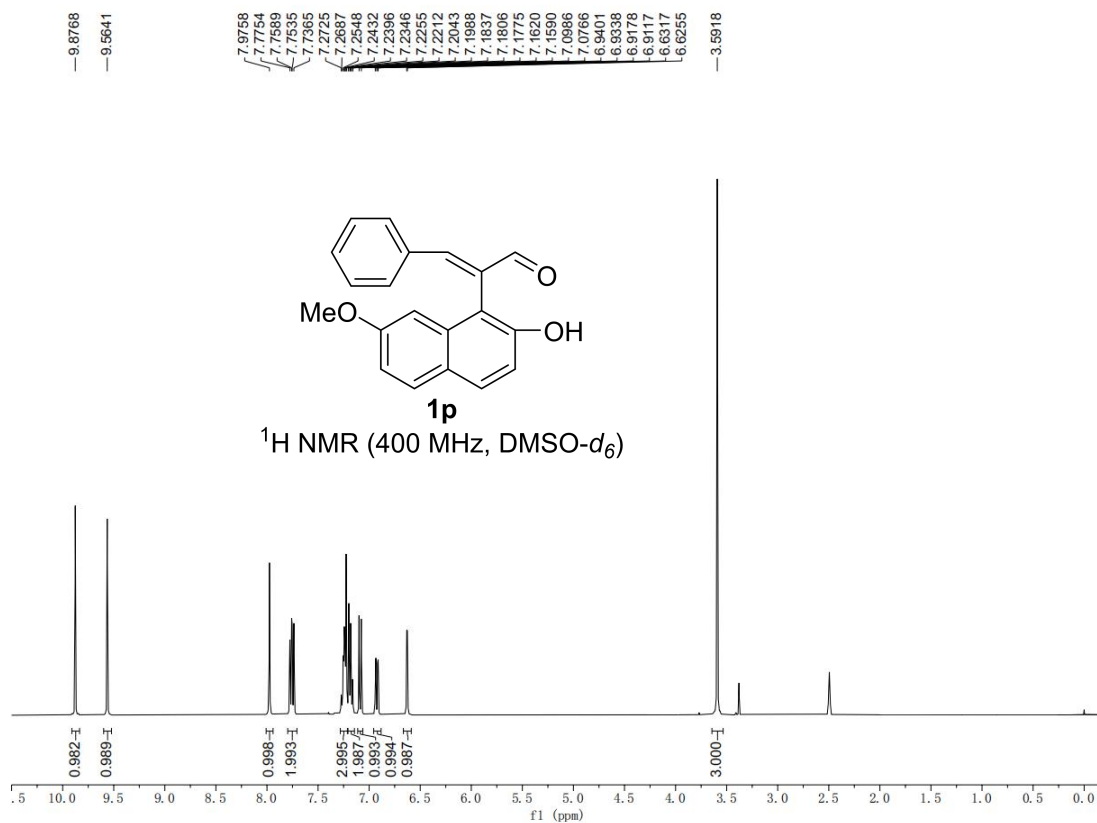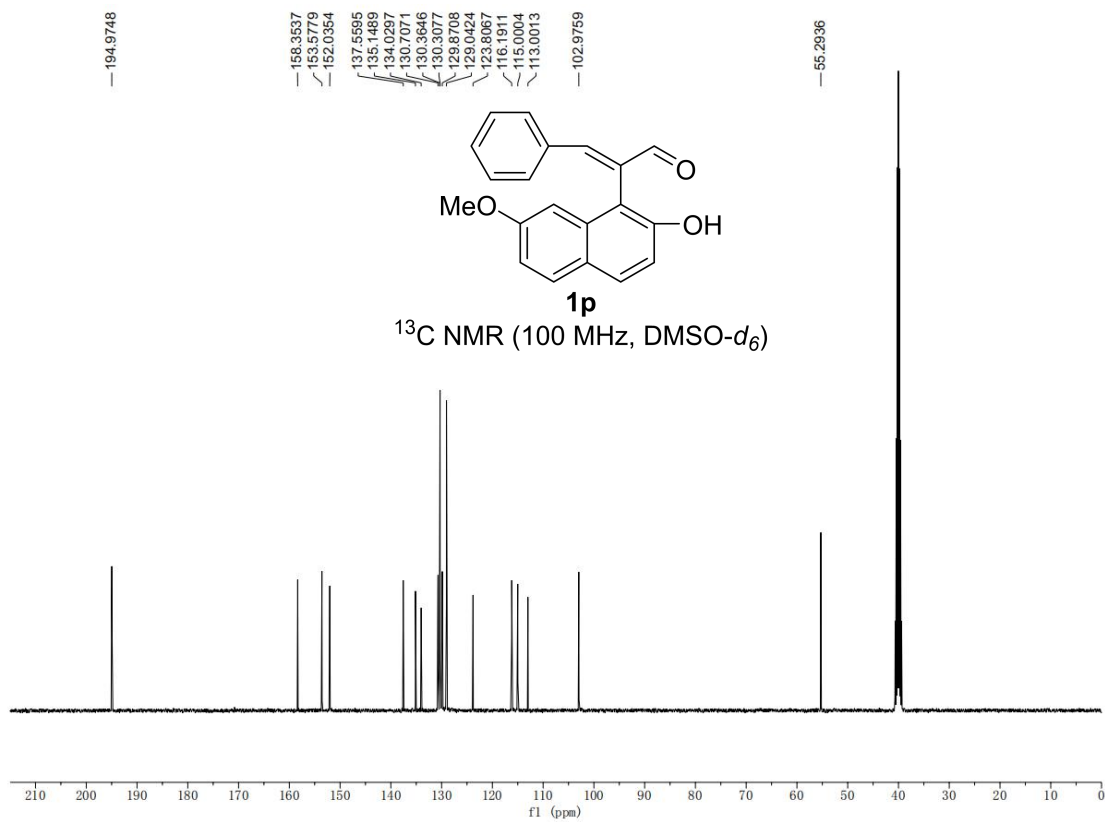

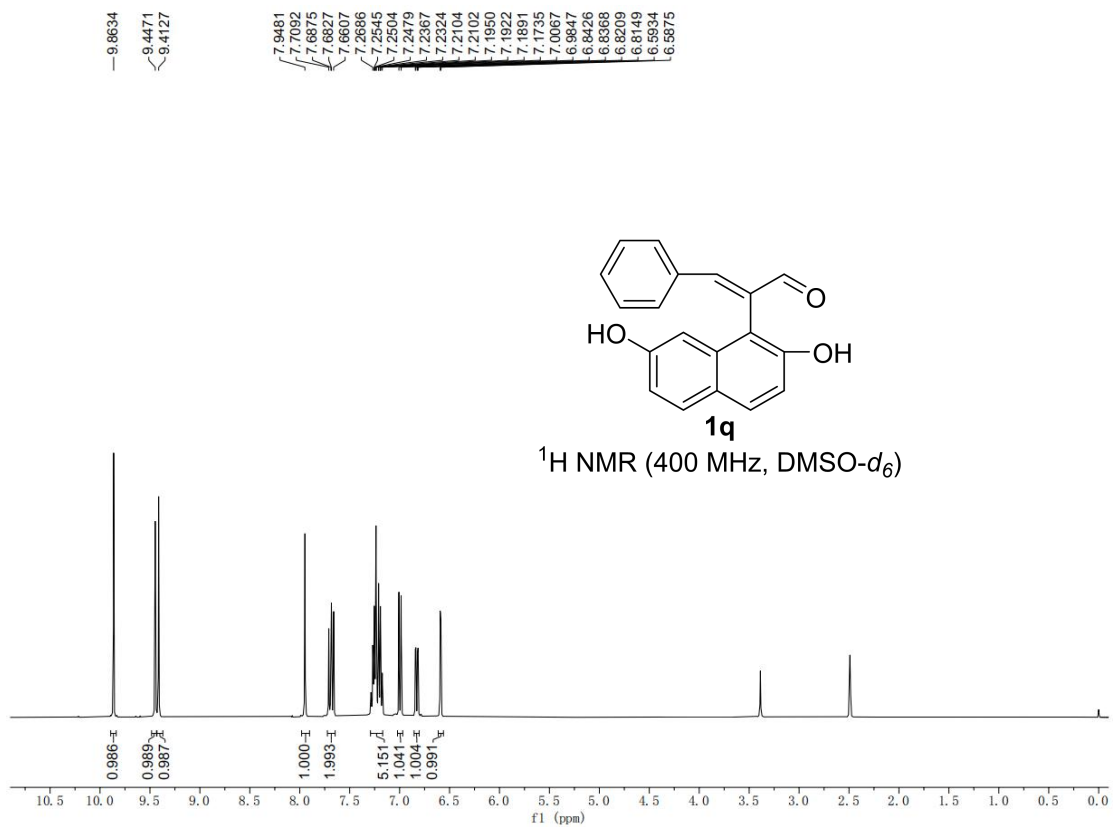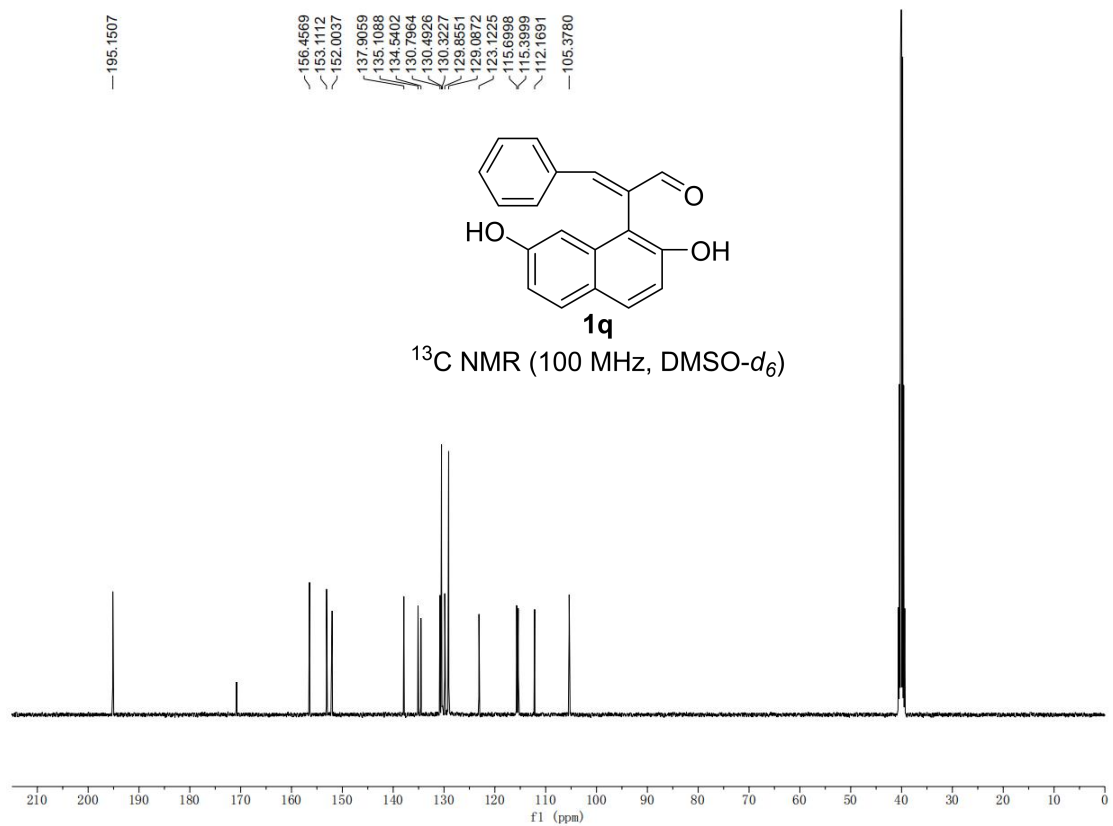

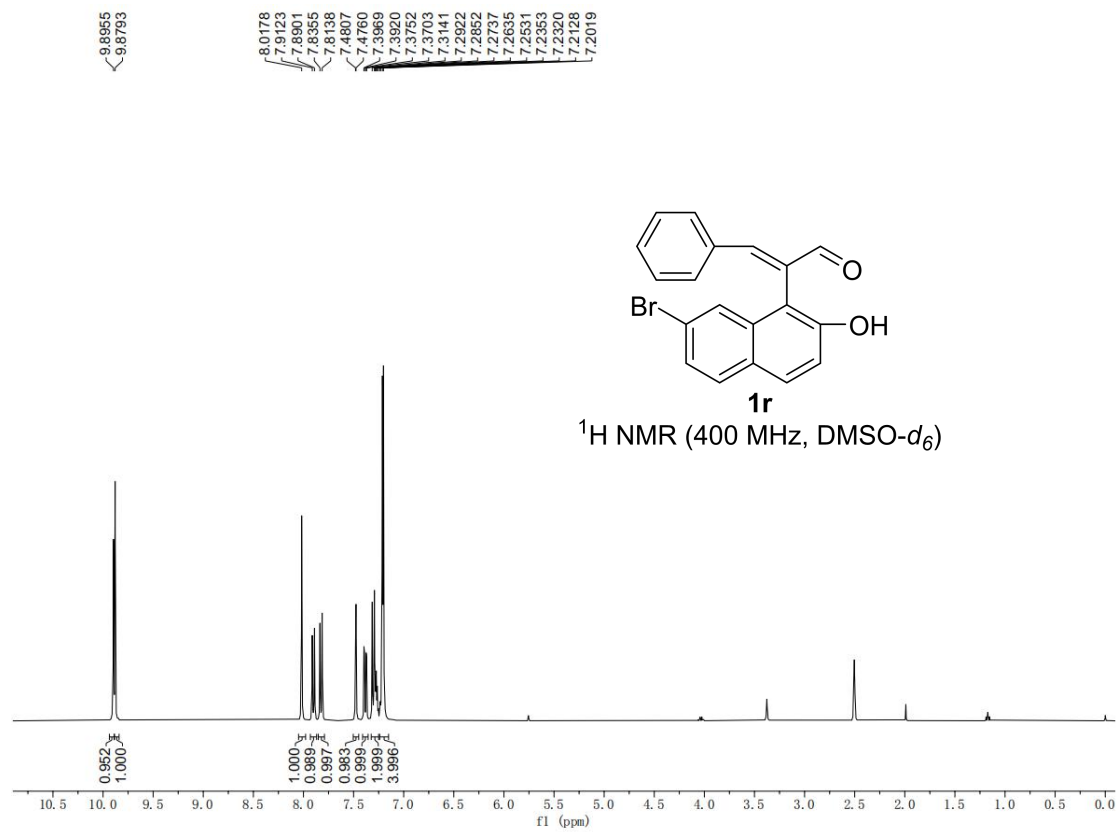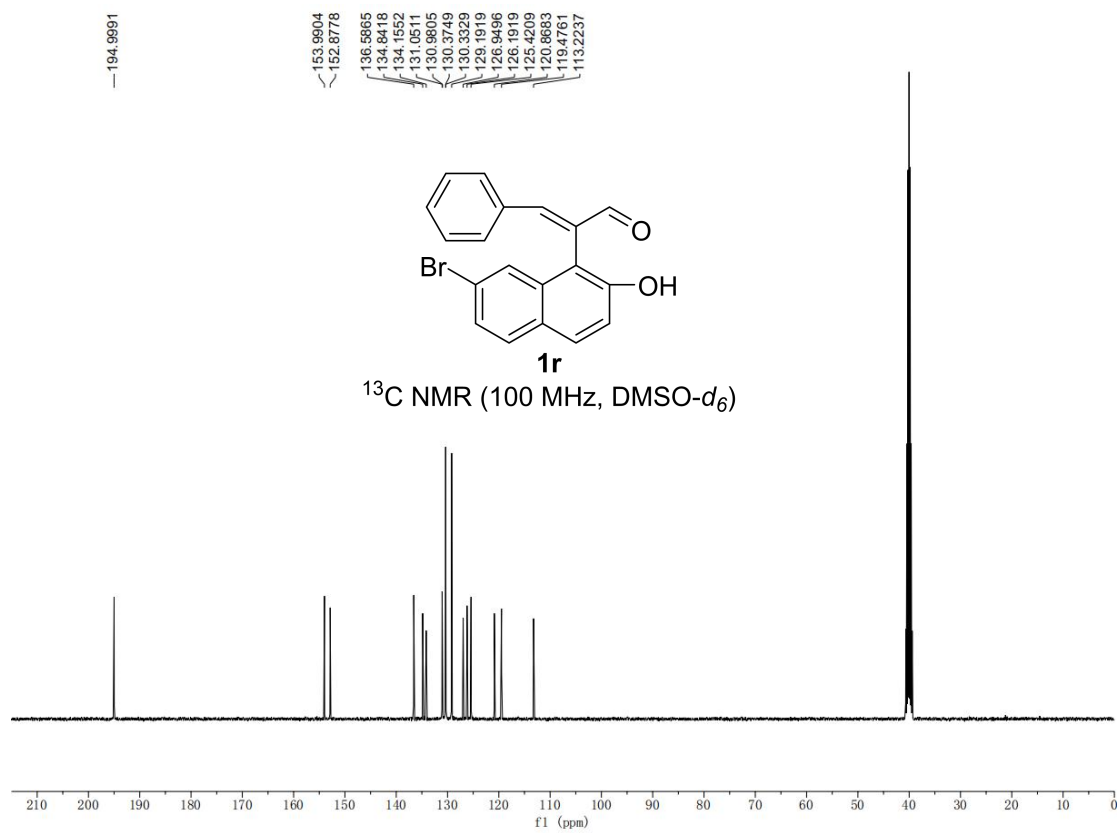

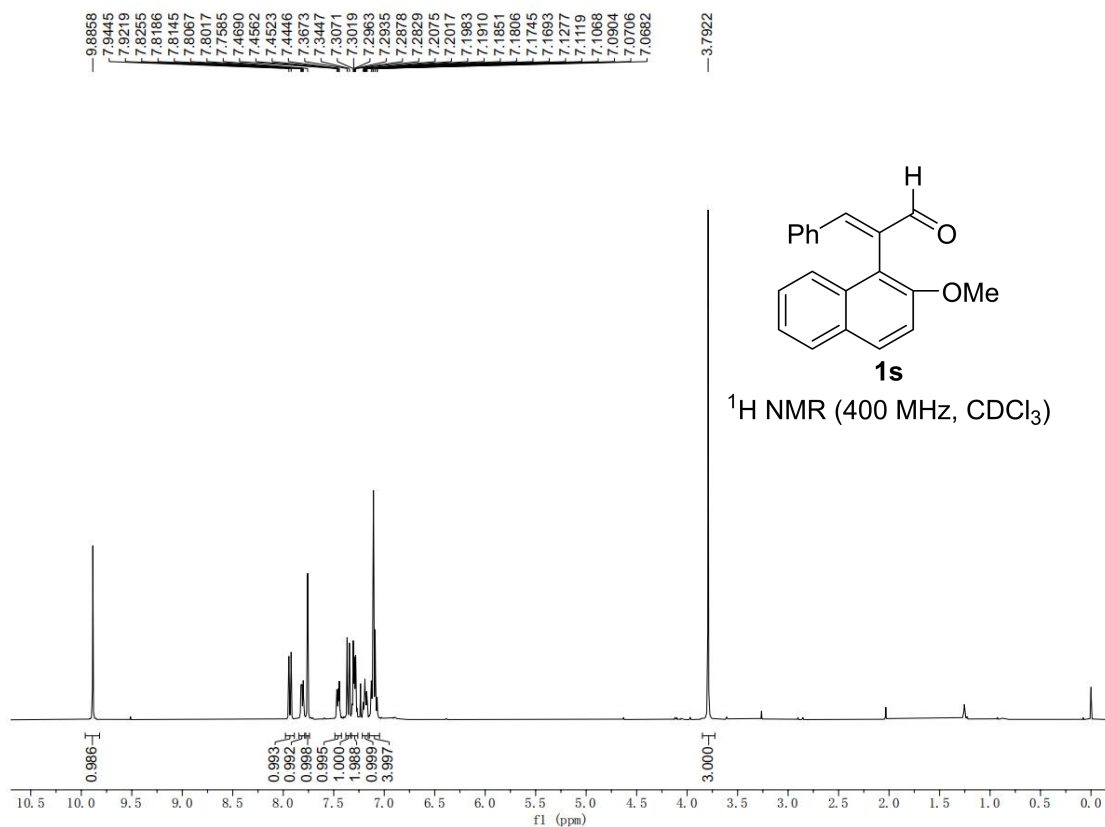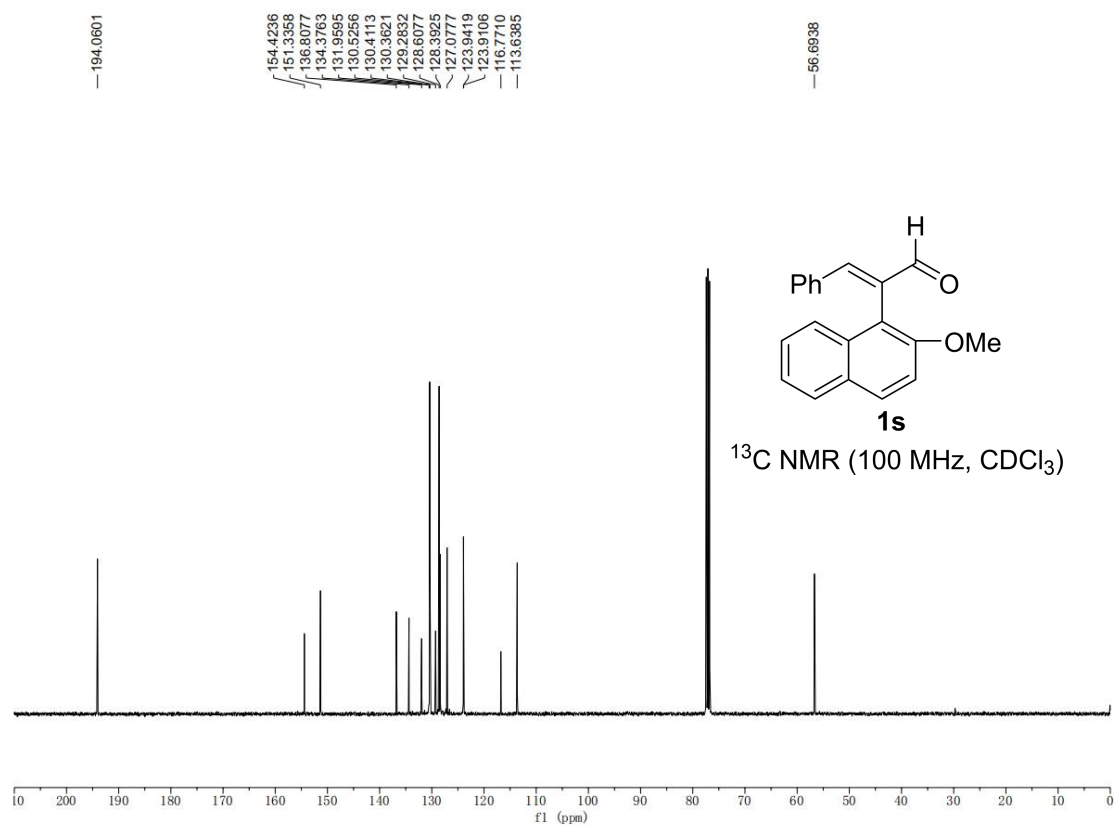





7.8166  
7.7964  
7.7743  
7.7521  
7.7257  
7.7050  
7.4090  
7.3910  
7.3713  
7.3474  
7.3284  
7.3100  
7.2433  
7.2253  
7.2063  
7.1903  
7.1697  
7.0984  
7.0273  
7.0064  
6.9883  
6.9672  
6.9527  
6.8106  
6.7922  
6.7642  
6.7434  
6.7044  
6.6843

4.2645  
4.2262  
4.0966  
4.0581

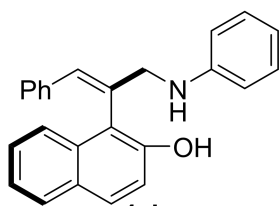

**4ab**  
 $^1\text{H NMR}$  (400 MHz,  $\text{CDCl}_3$ )

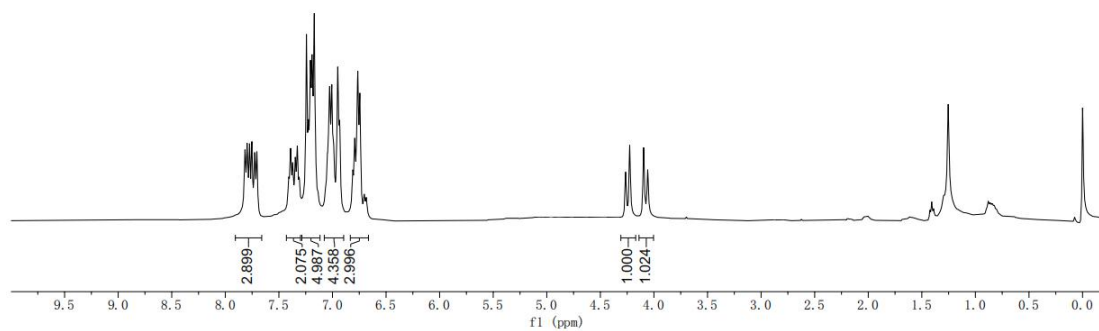

150.5643  
147.2214  
135.4223  
133.3019  
132.4292  
131.8764  
129.7458  
129.4501  
129.3409  
128.4908  
128.3874  
128.2841  
127.7630  
126.9182  
123.8626  
123.5344  
119.0277  
118.1602  
115.2619  
114.2108

52.5900

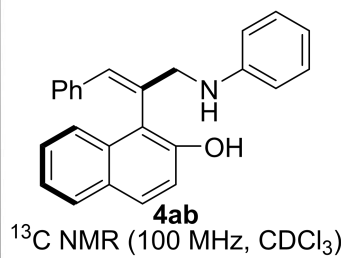

**4ab**  
 $^{13}\text{C NMR}$  (100 MHz,  $\text{CDCl}_3$ )

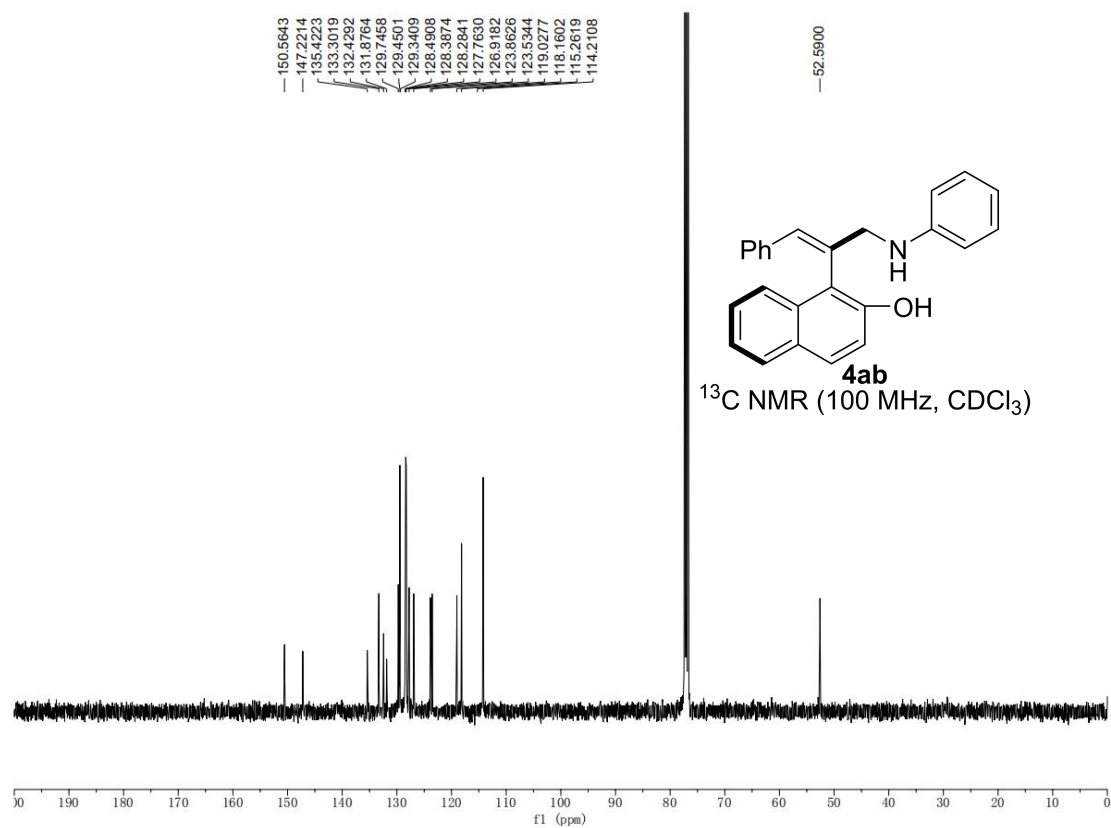

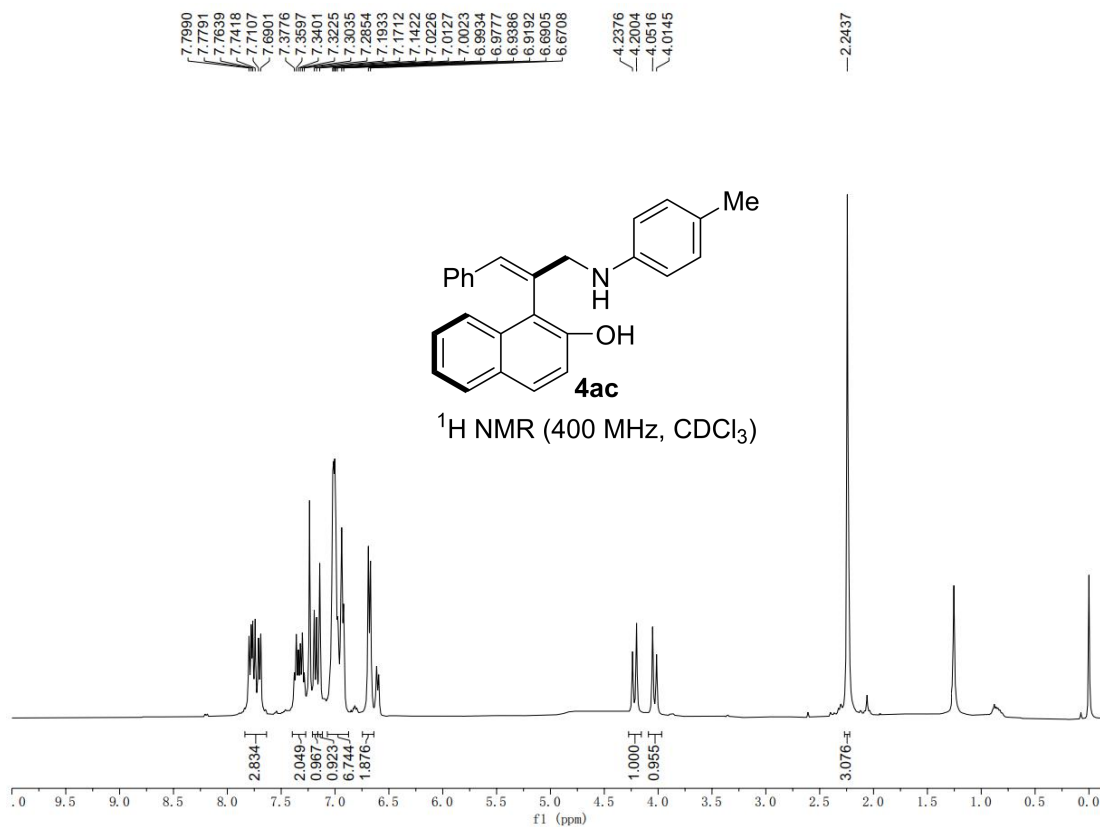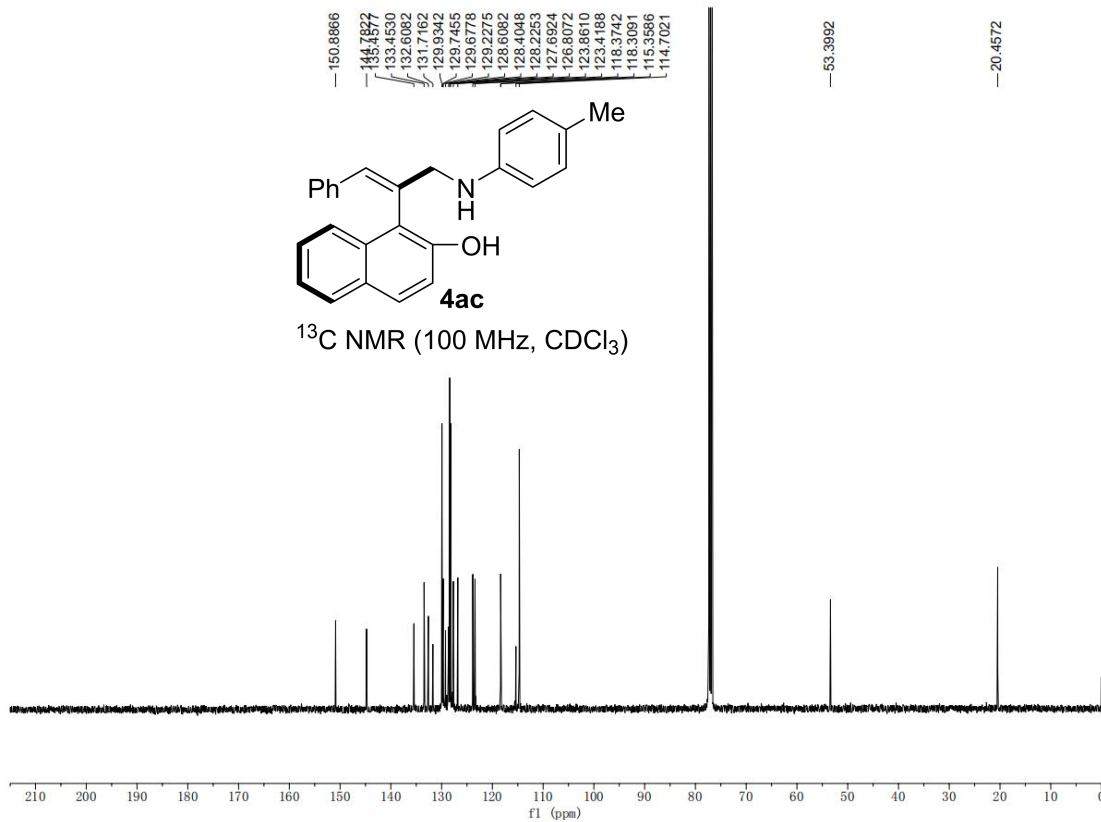

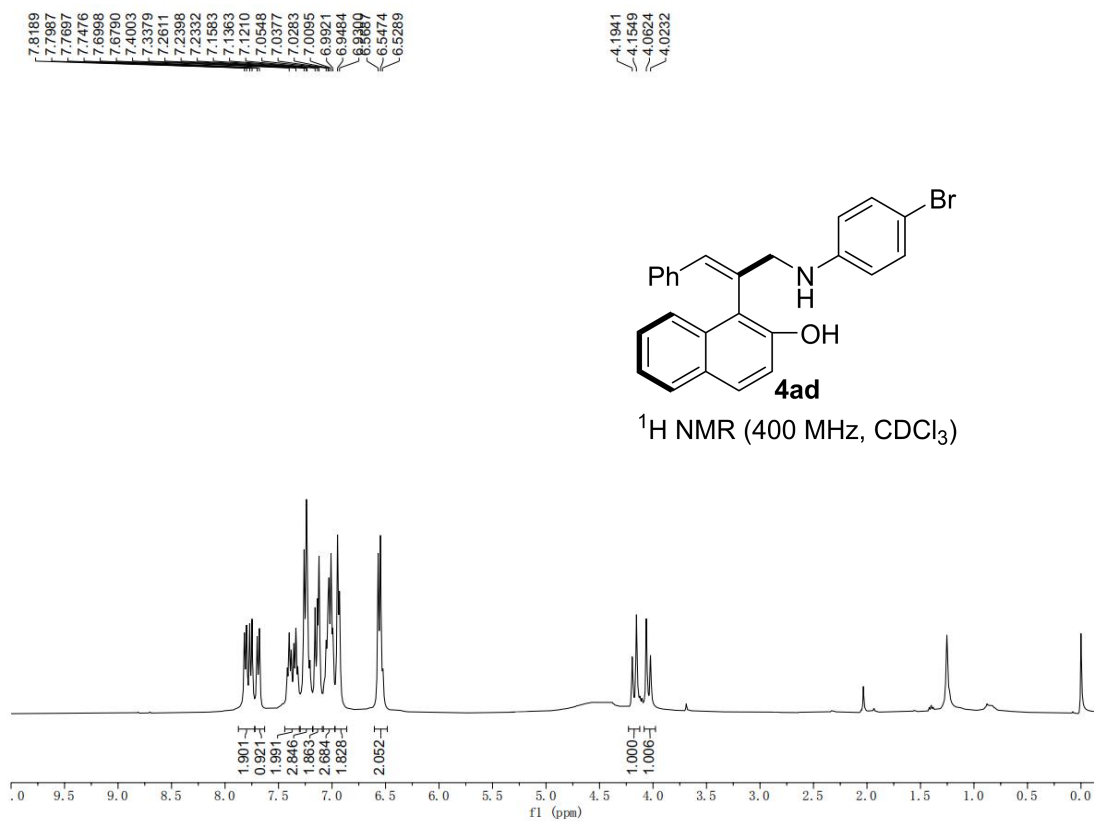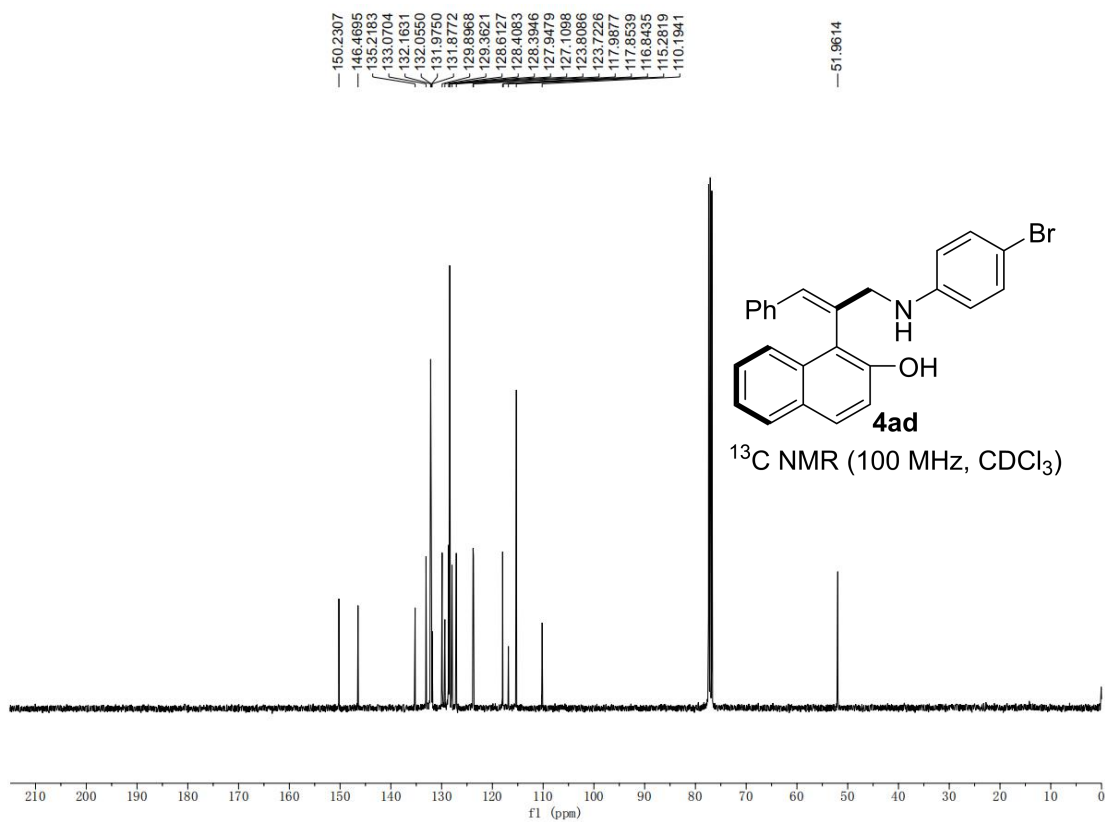

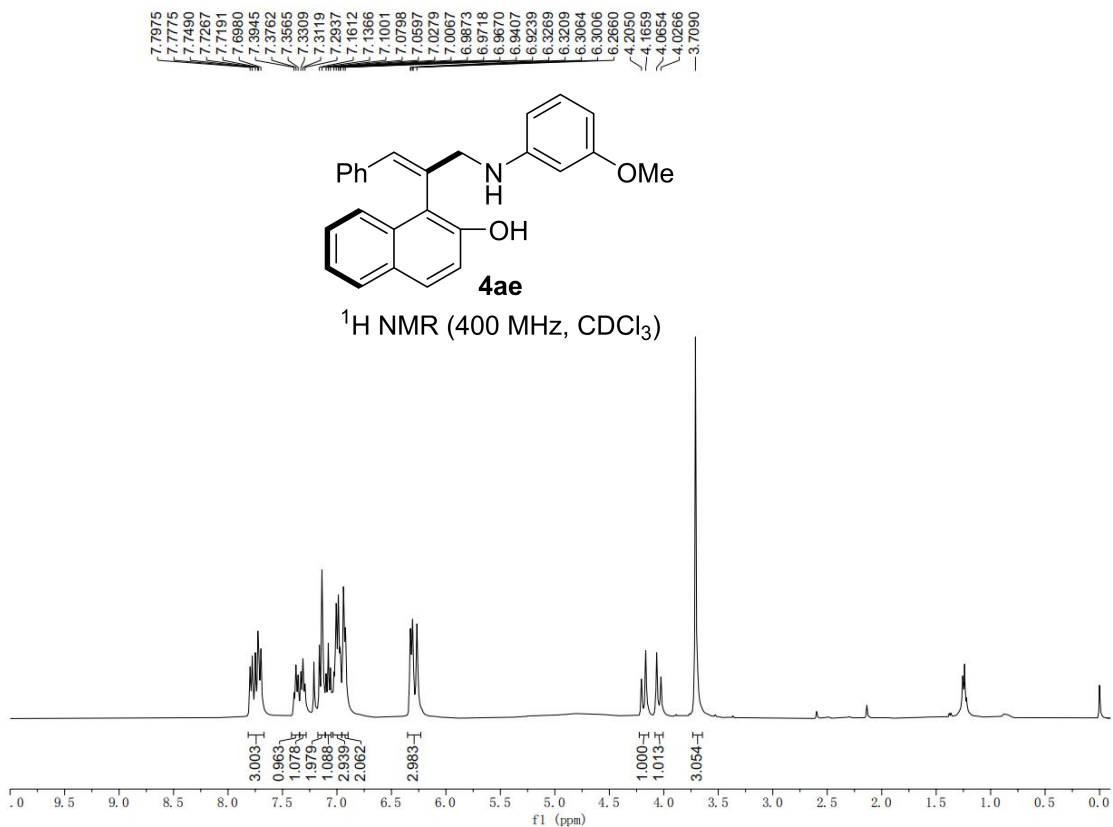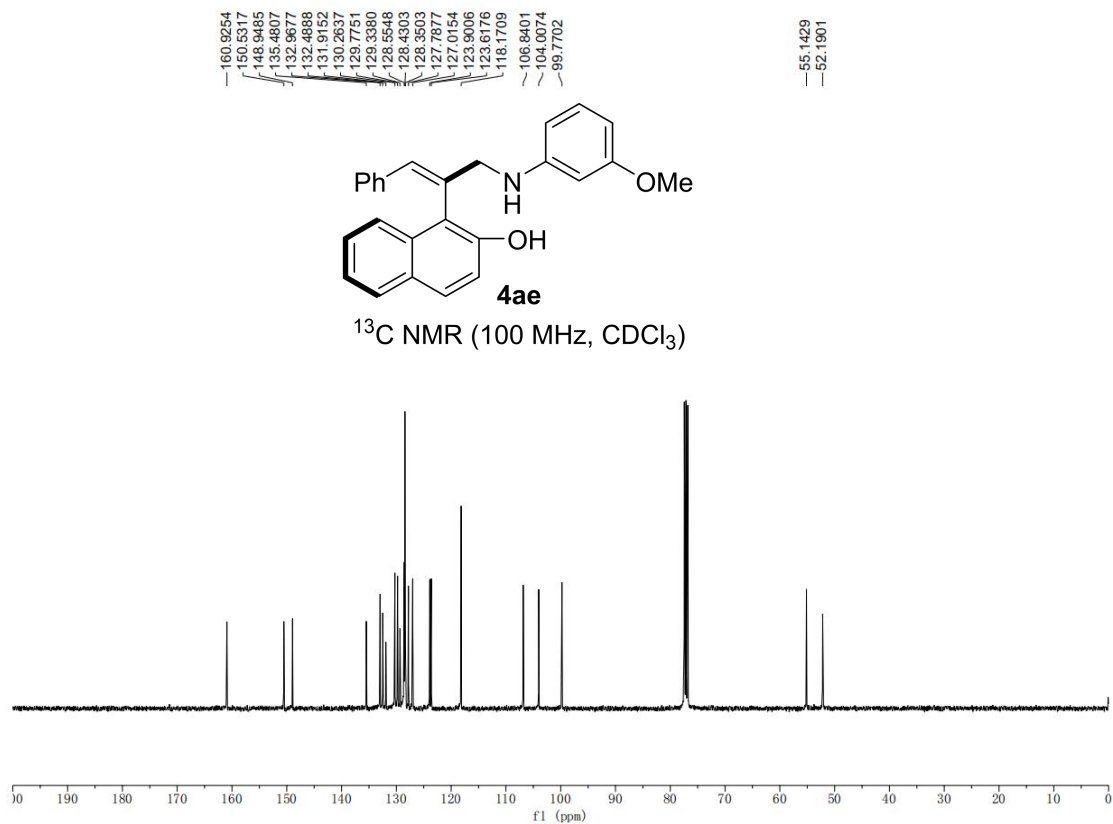

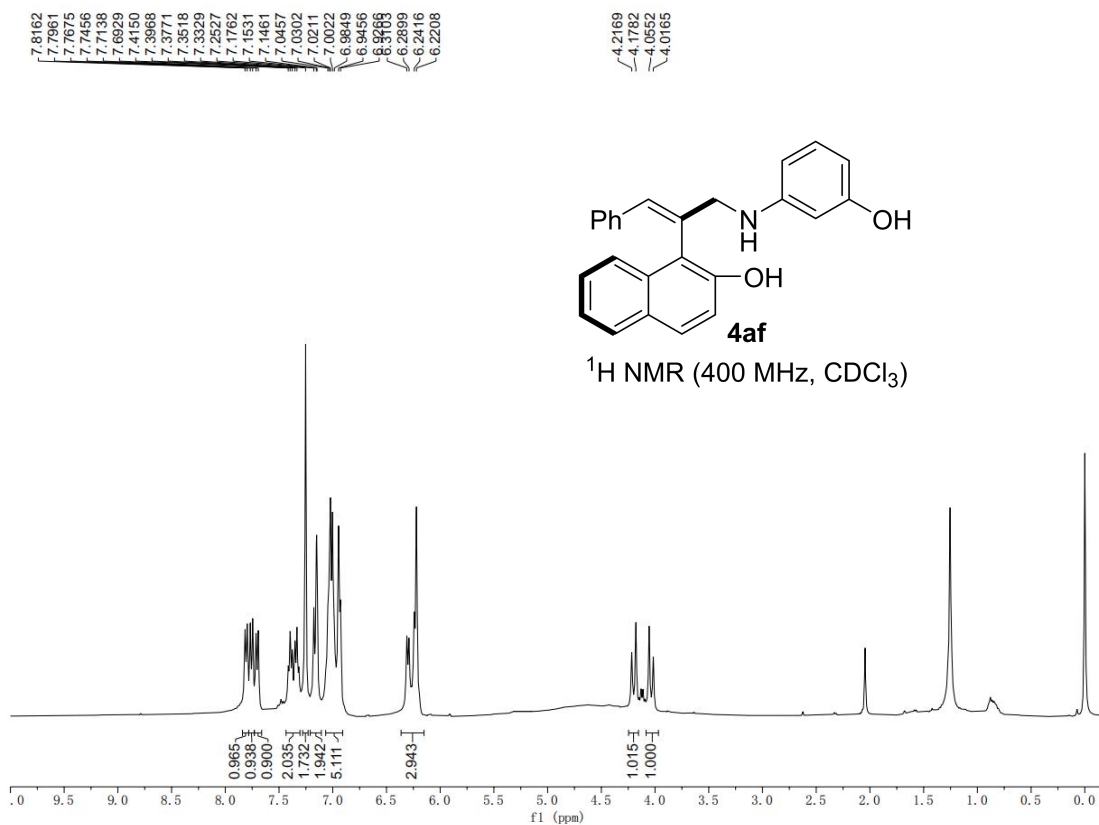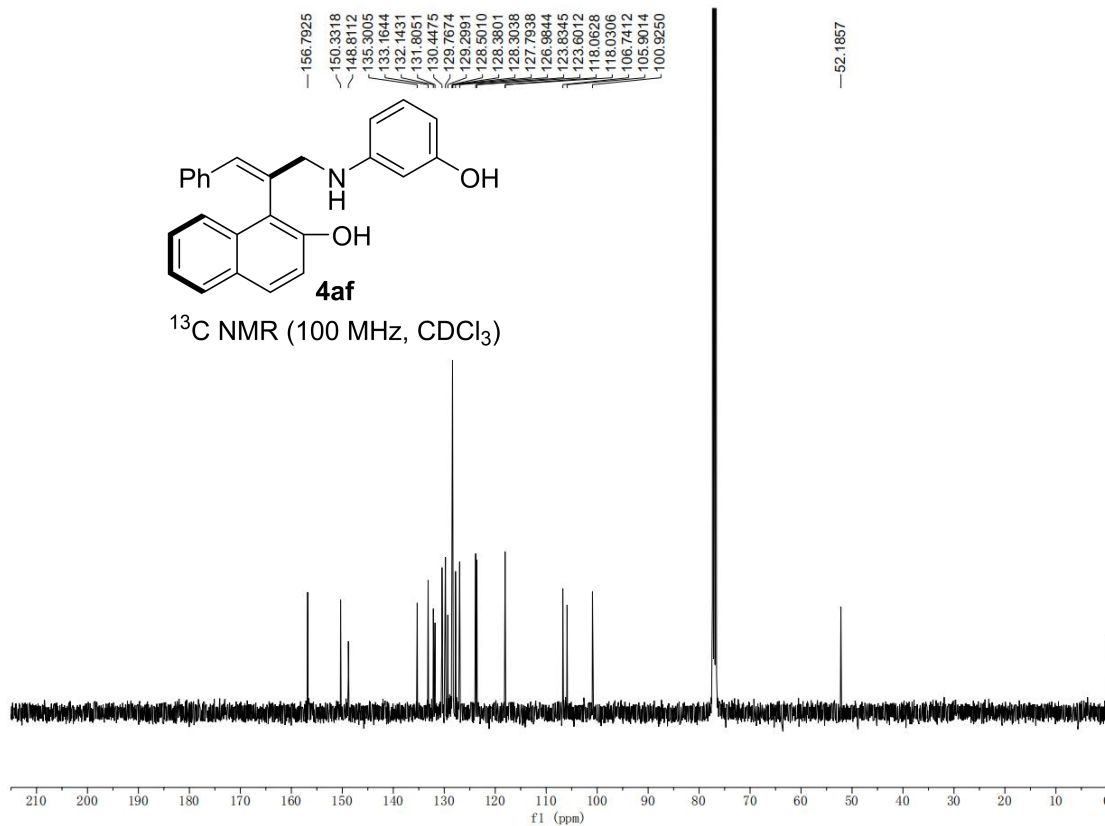

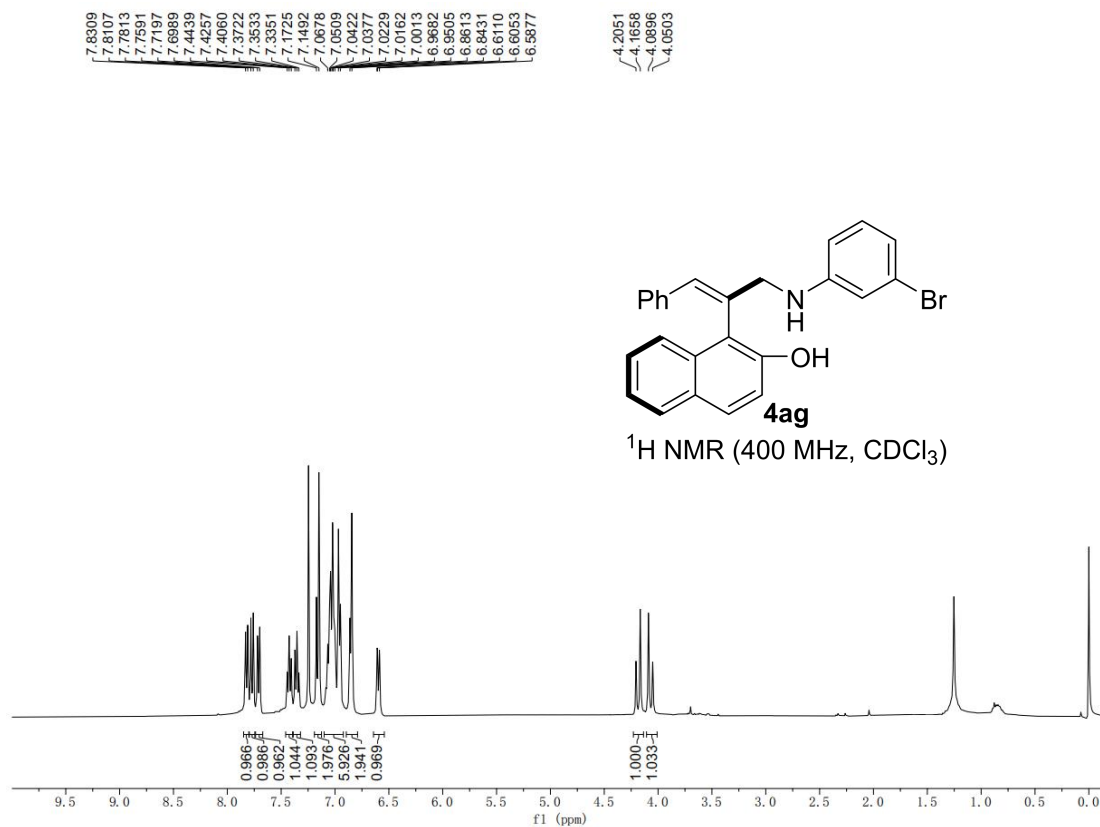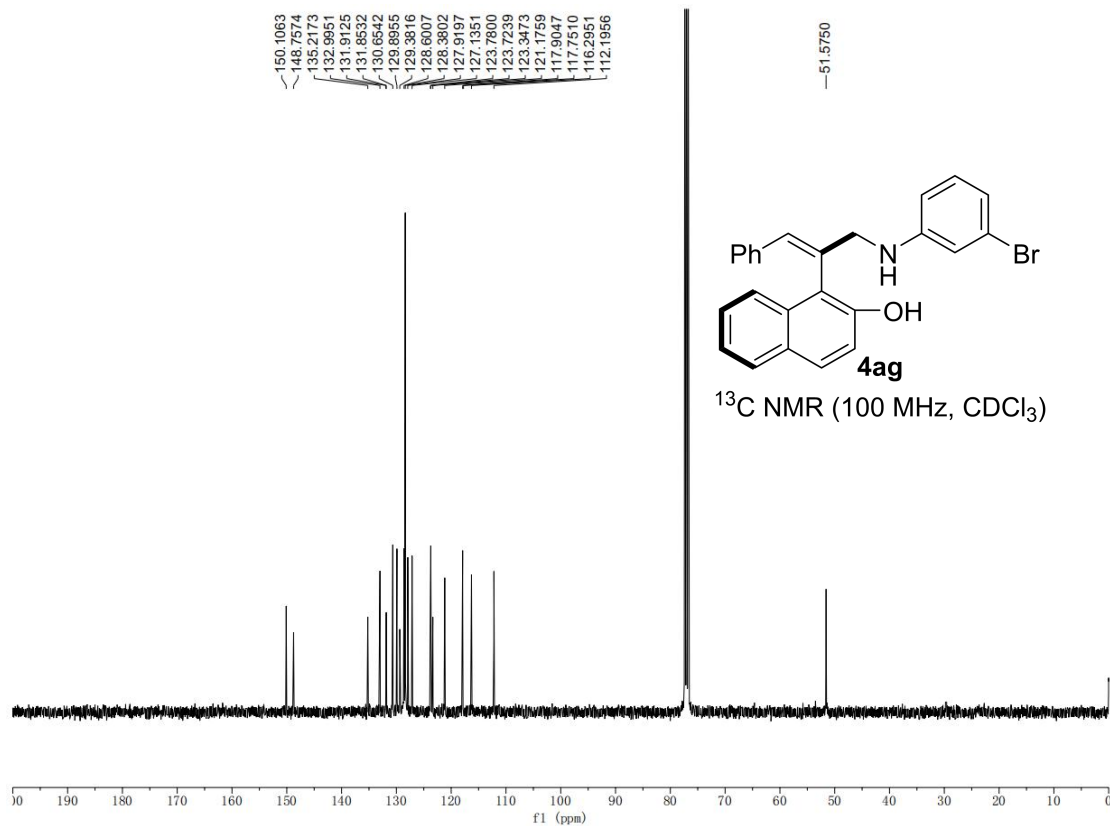

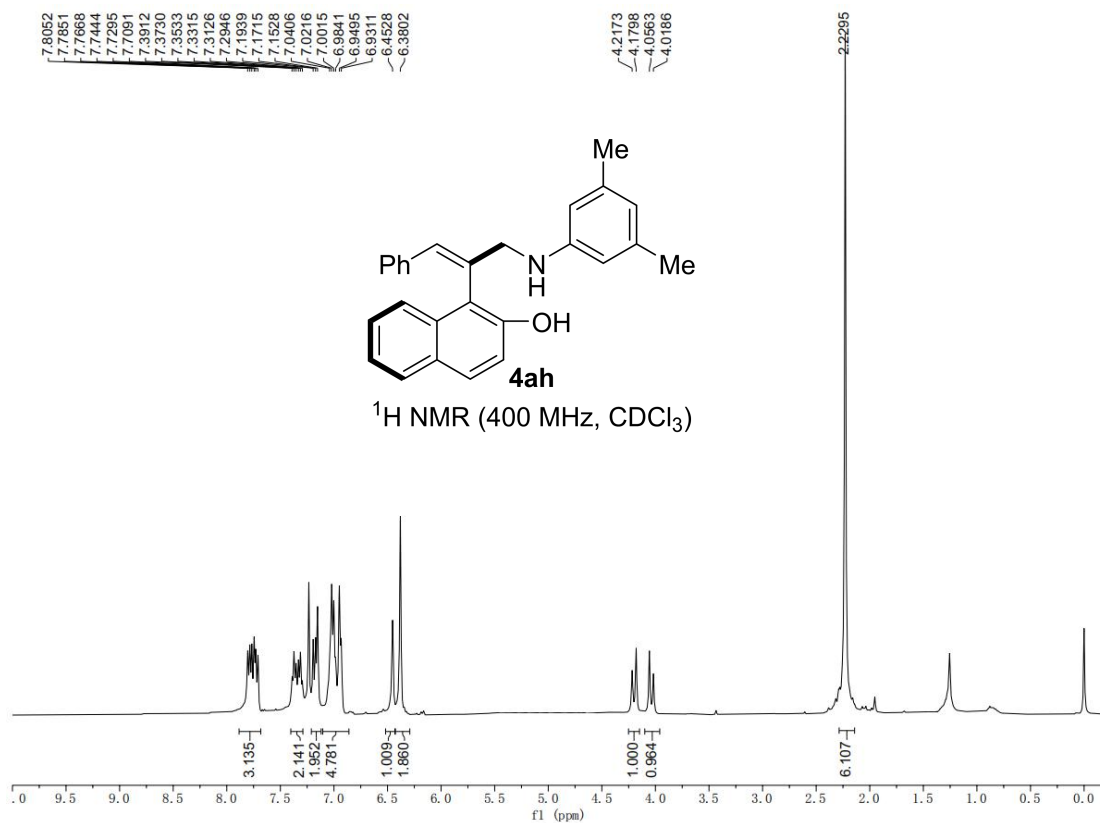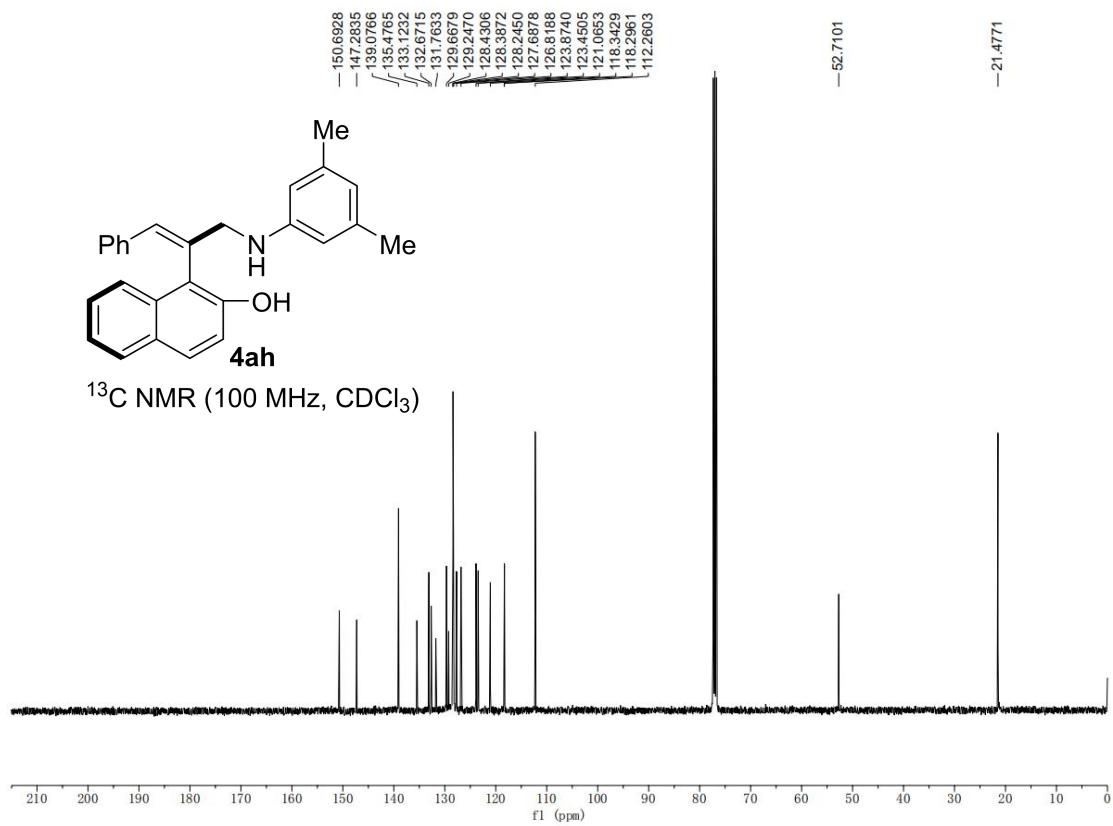

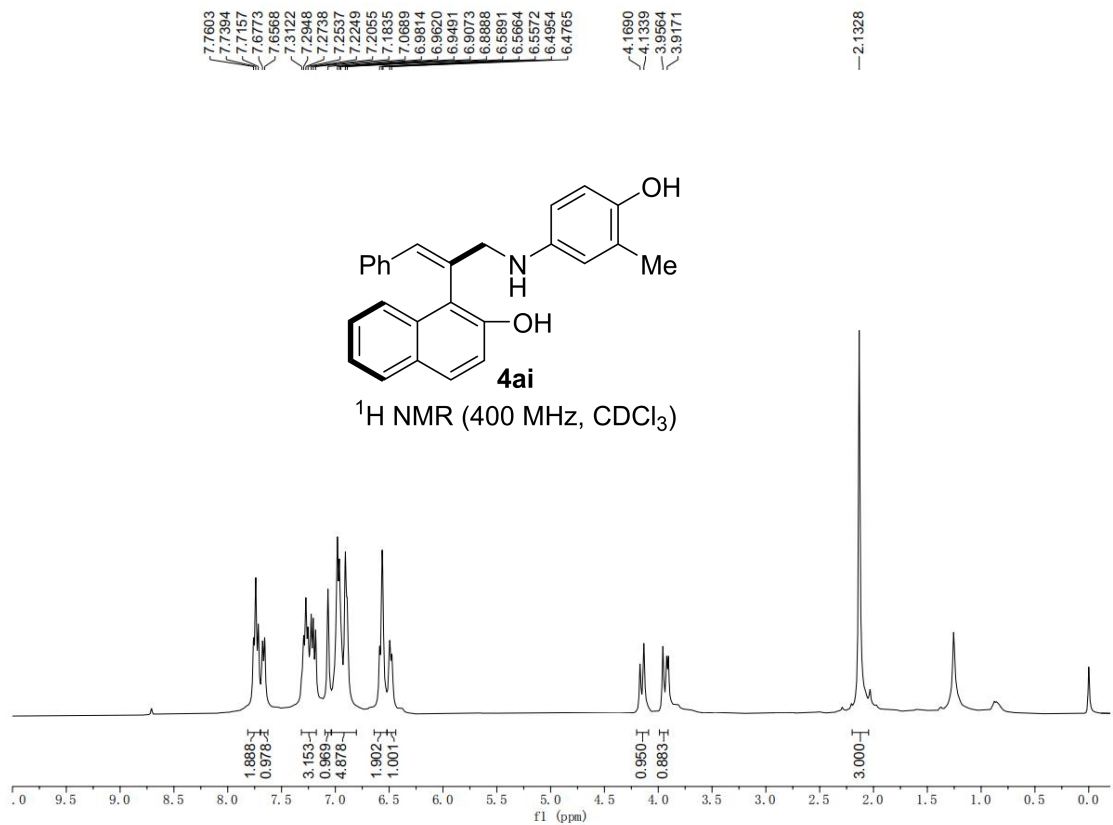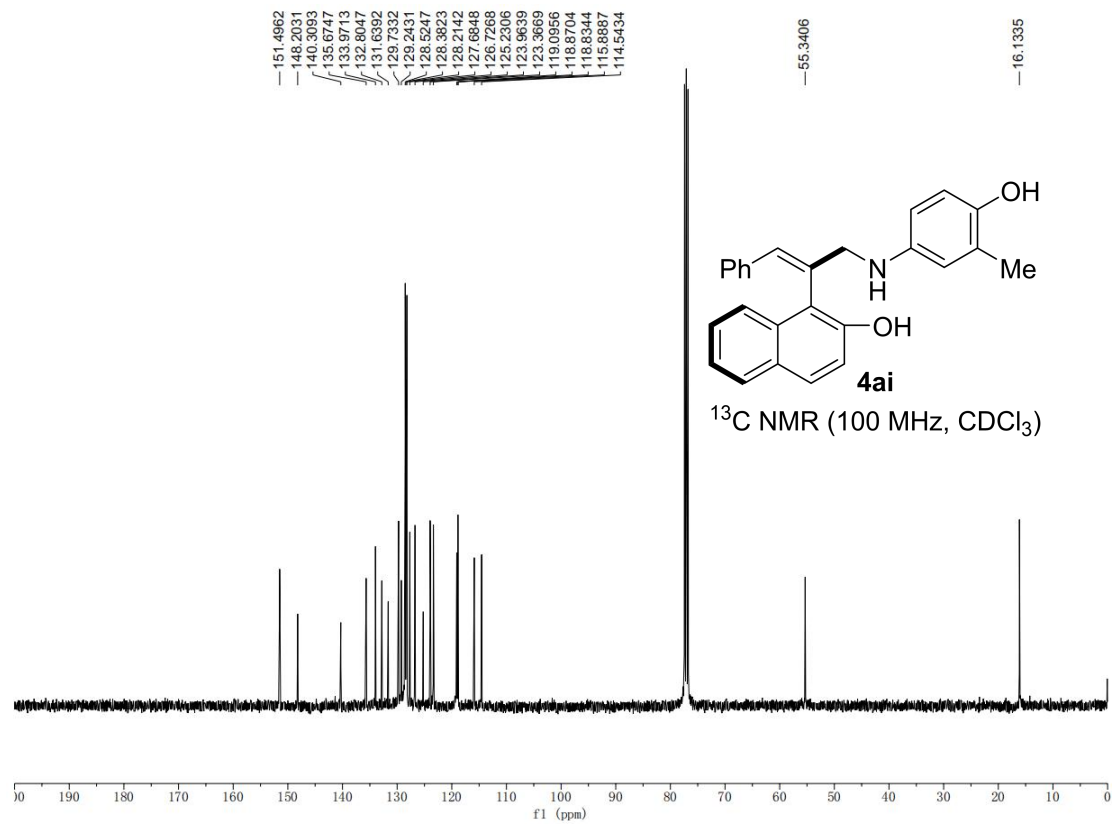



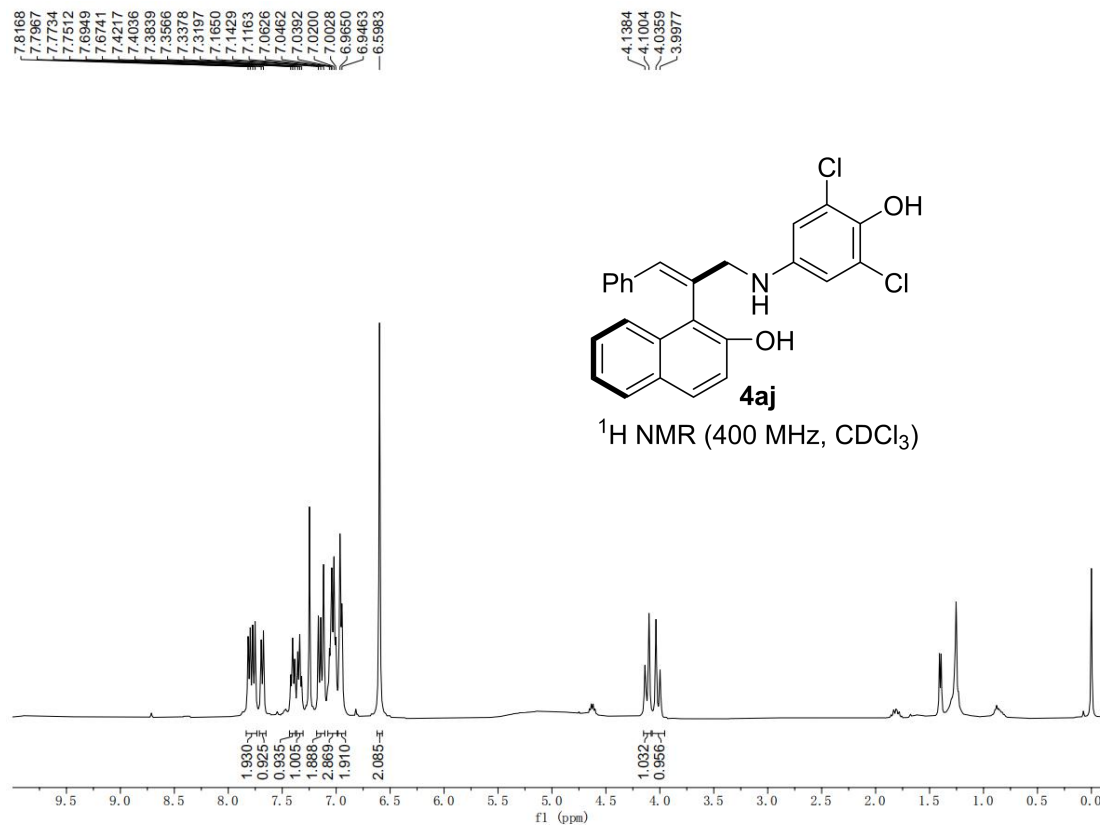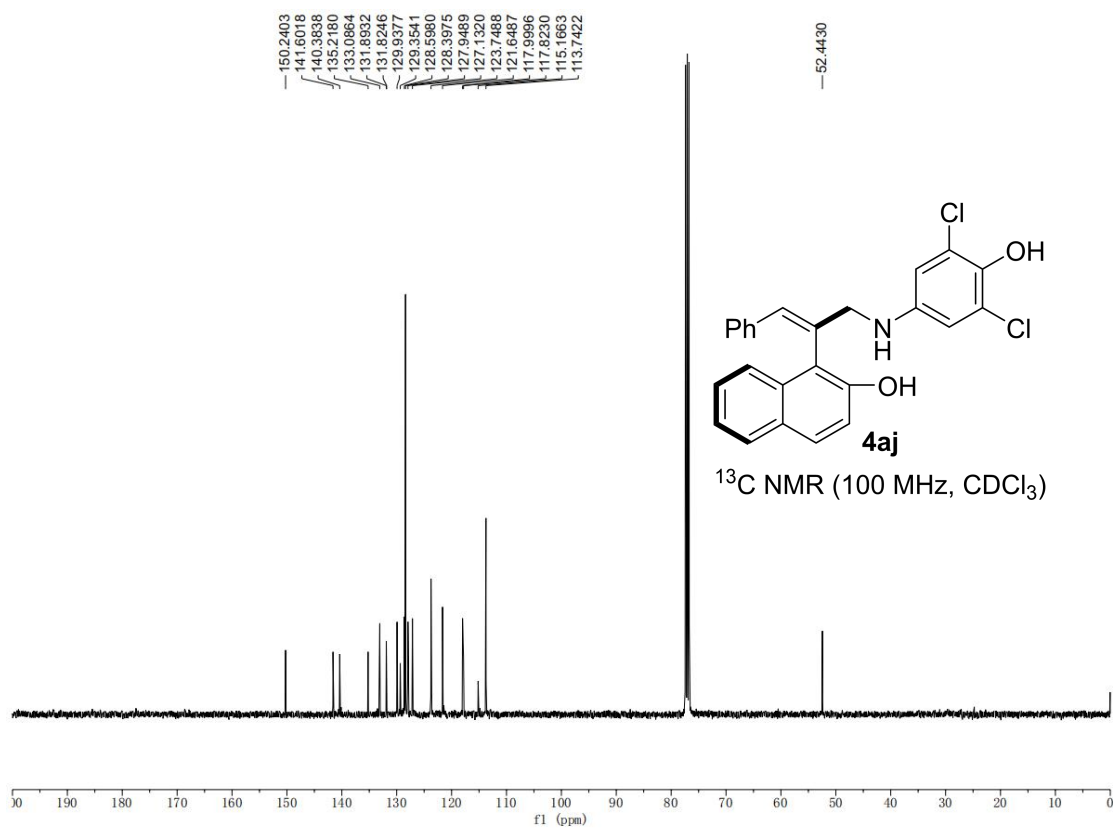

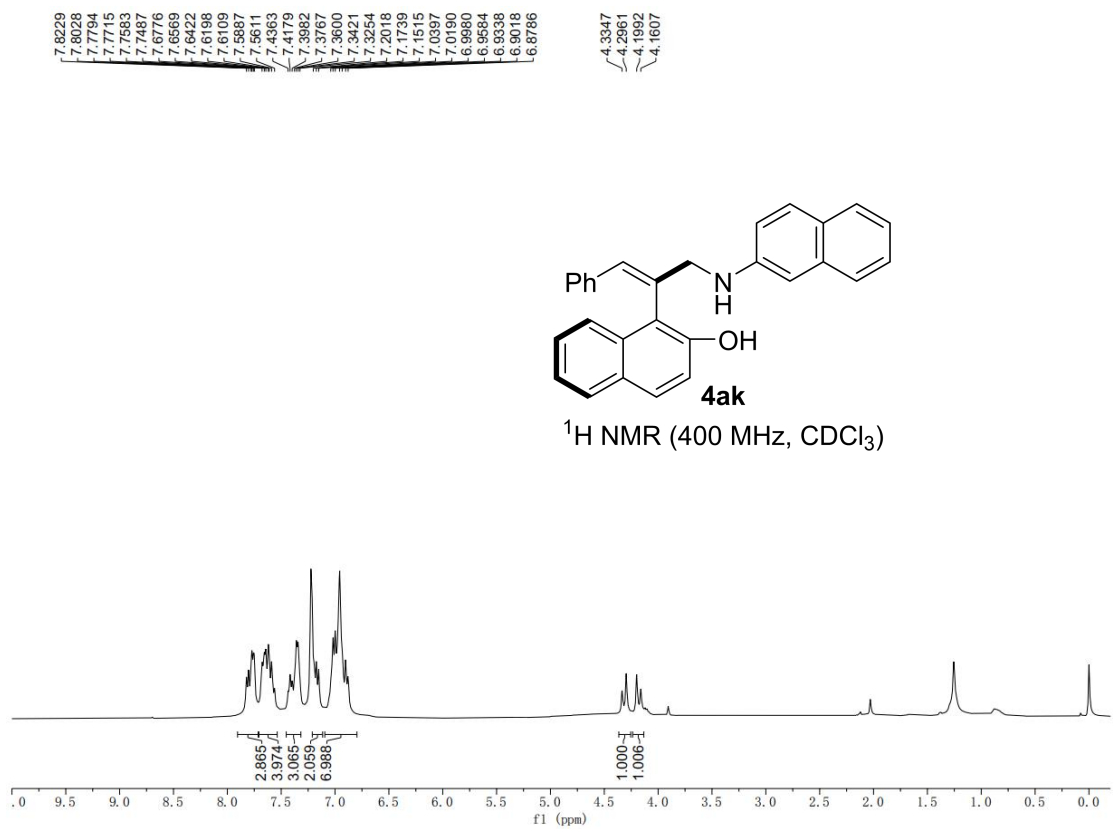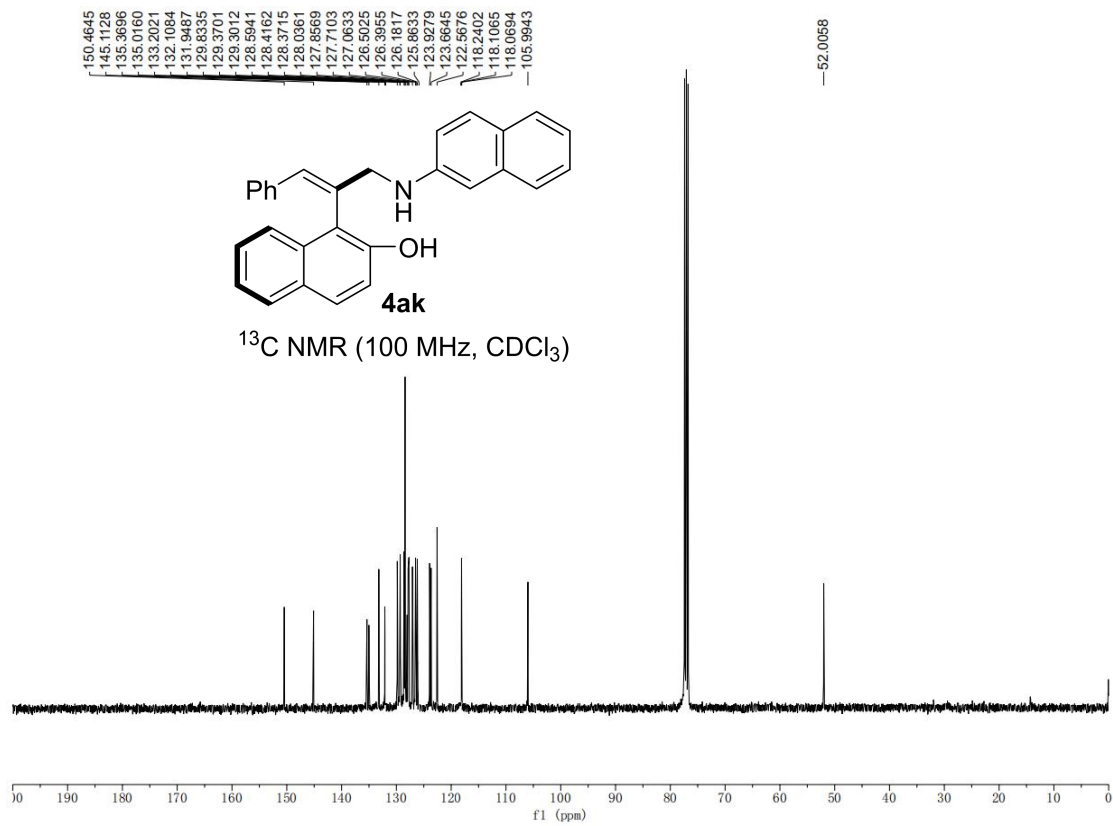

7.8258  
7.8036  
7.7821  
7.7596  
7.7397  
7.7194  
7.4863  
7.4460  
7.4273  
7.4052  
7.3863  
7.3477  
7.3283  
7.3045  
7.2969  
7.2775  
7.2621  
7.1852  
7.1630  
7.0629  
7.0423  
7.0212  
7.0048  
6.9839  
6.9650  
6.8021  
6.7834  
6.7655

4.4170  
4.3800  
4.2953  
4.2582

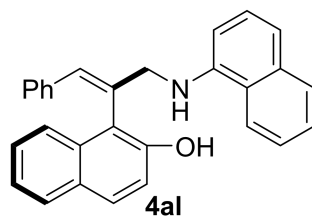

<sup>1</sup>H NMR (400 MHz, CDCl<sub>3</sub>)

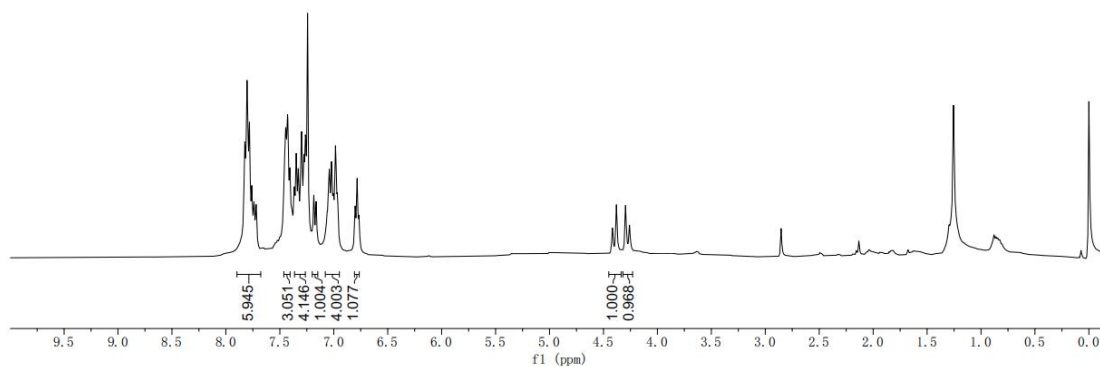

150.4492  
142.5254  
135.3713  
134.3950  
133.5387  
131.9304  
131.8453  
129.9103  
129.4054  
128.7606  
128.6067  
128.4773  
128.3788  
127.9018  
127.0941  
126.4528  
125.9432  
125.1724  
123.9236  
123.9058  
123.6856  
119.9057  
118.8905  
118.1199  
118.0868  
105.9141  
52.3515

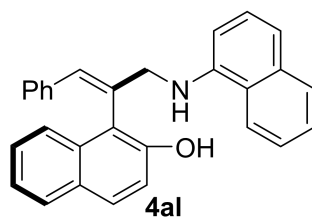

<sup>13</sup>C NMR (100 MHz, CDCl<sub>3</sub>)

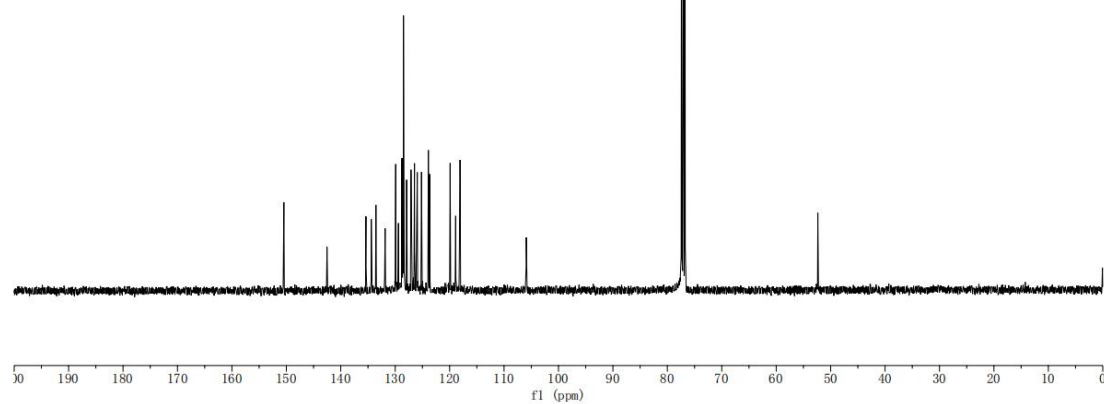

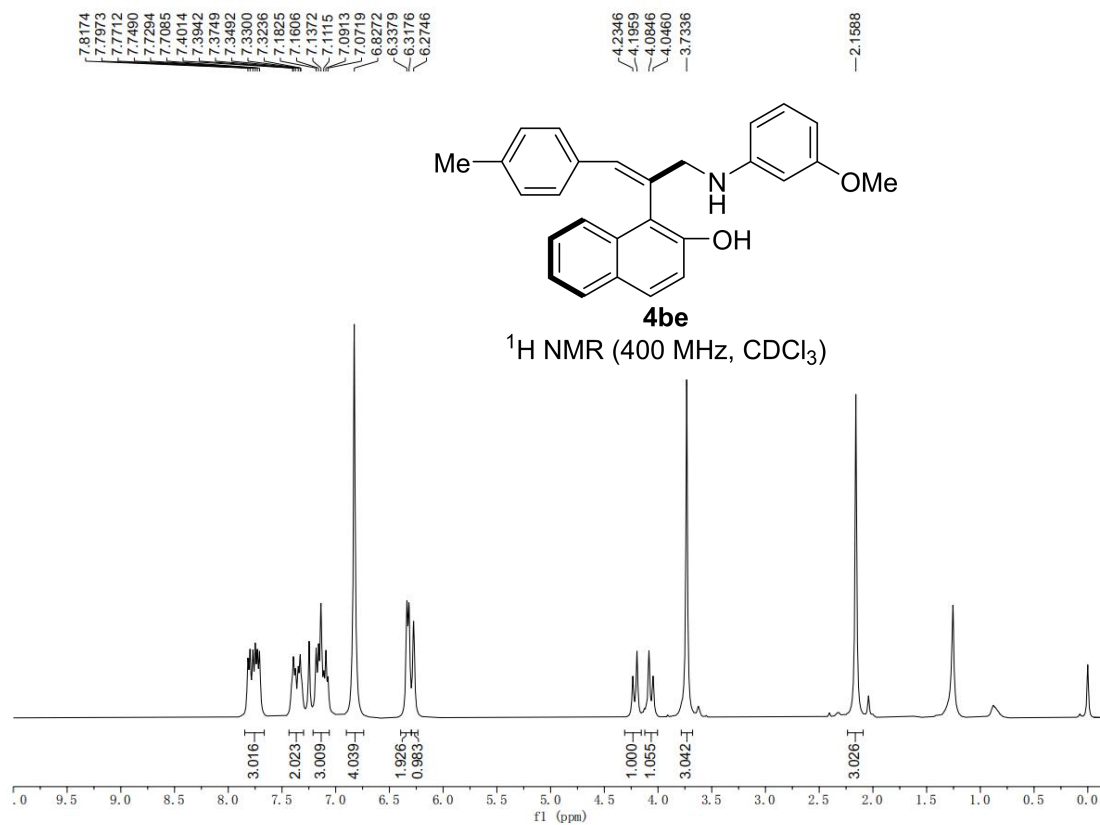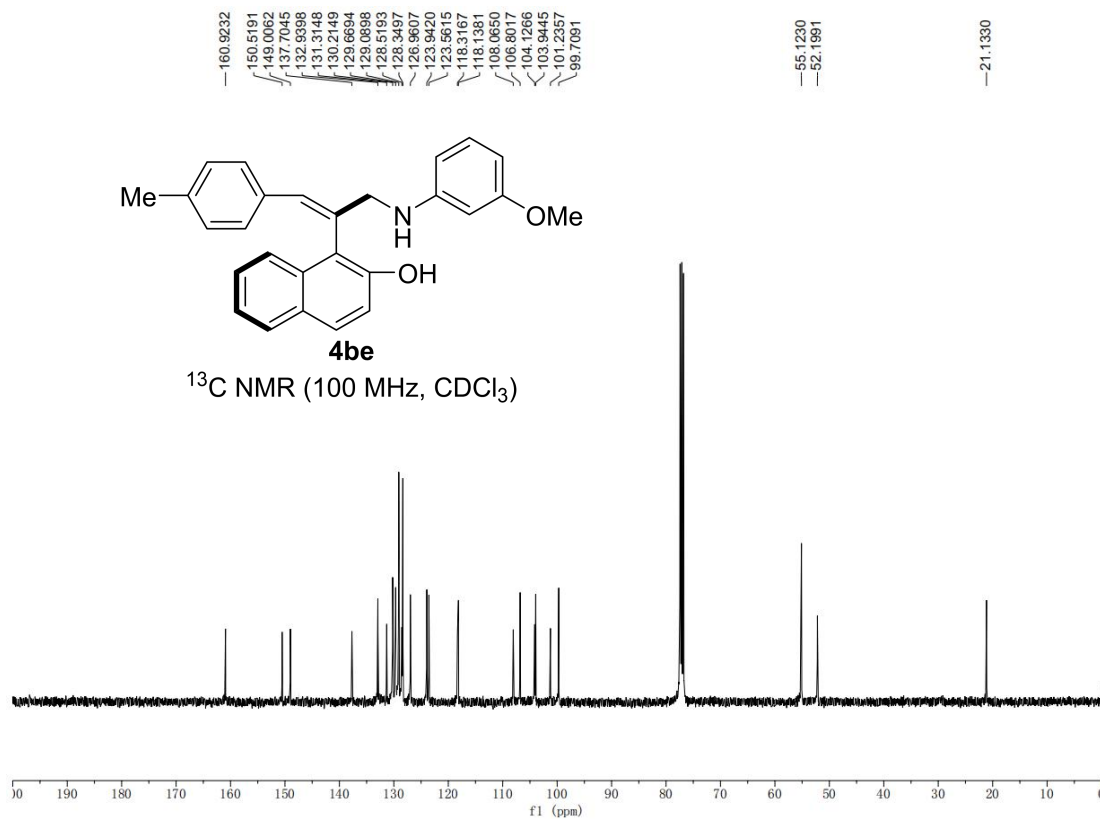

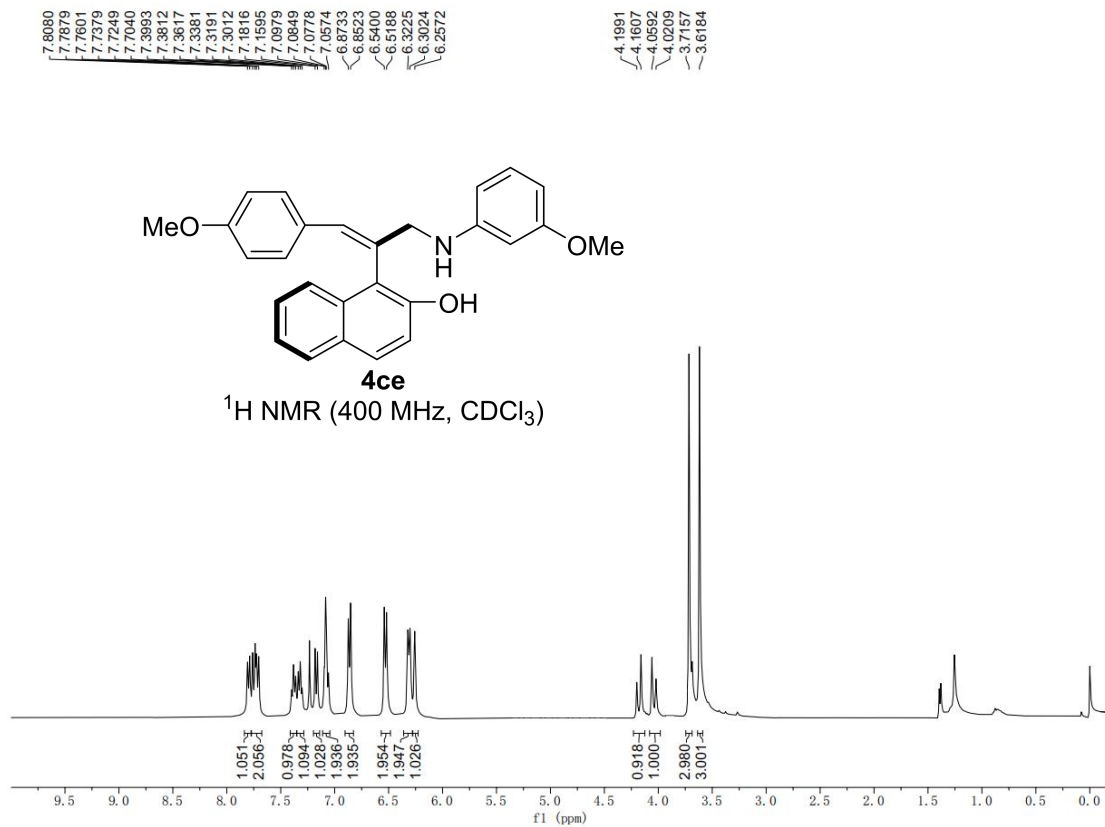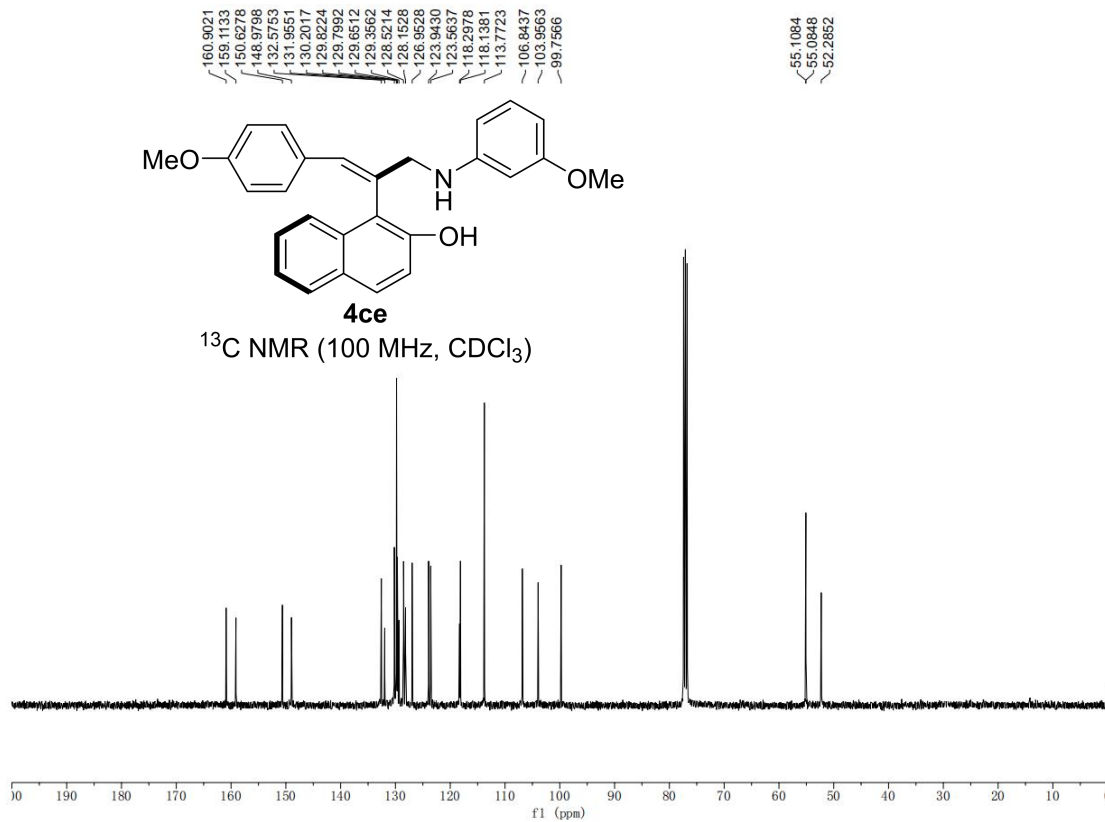

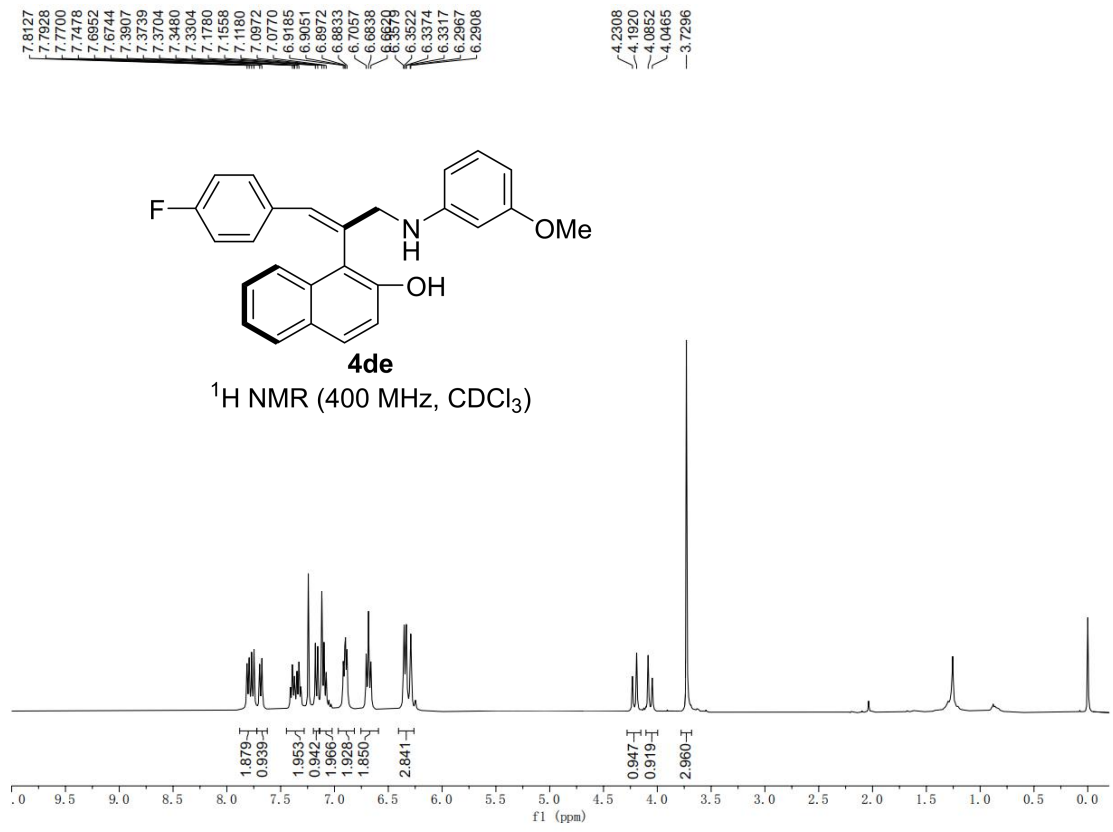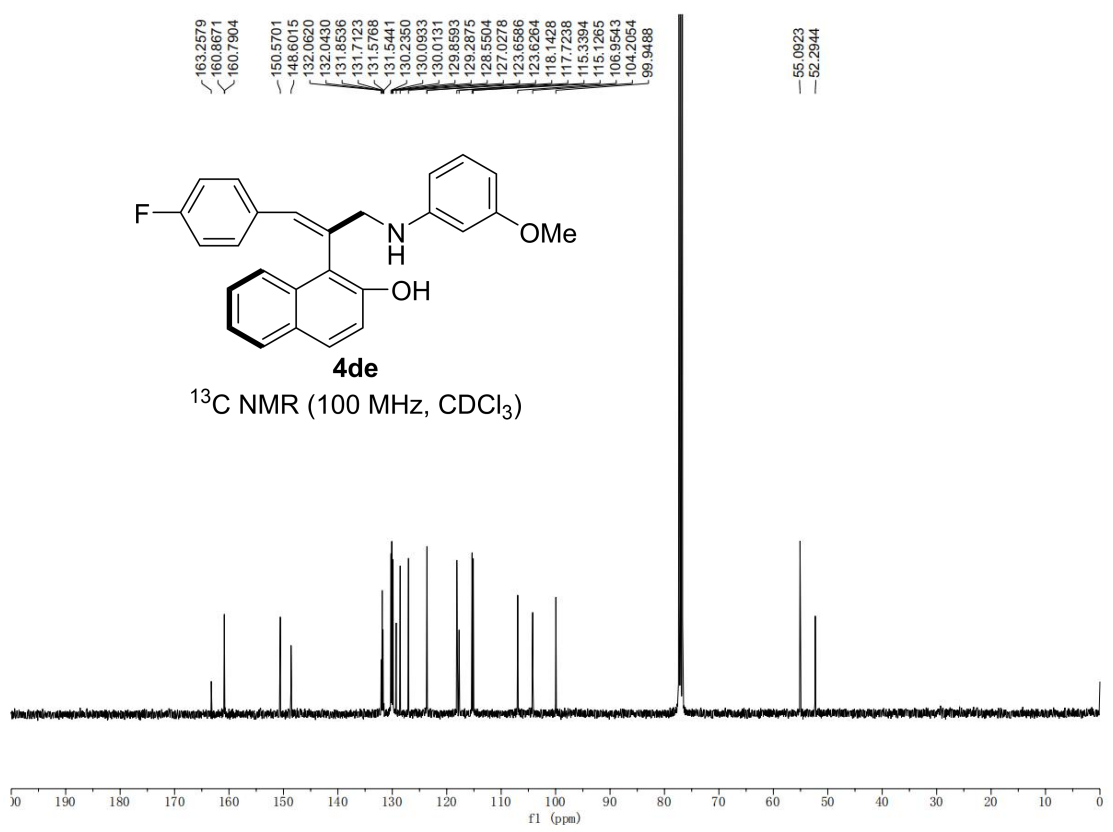

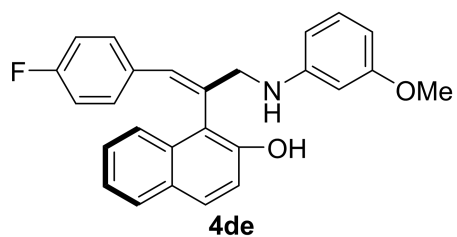

$^{19}\text{F}$  NMR (376 MHz,  $\text{CDCl}_3$ )

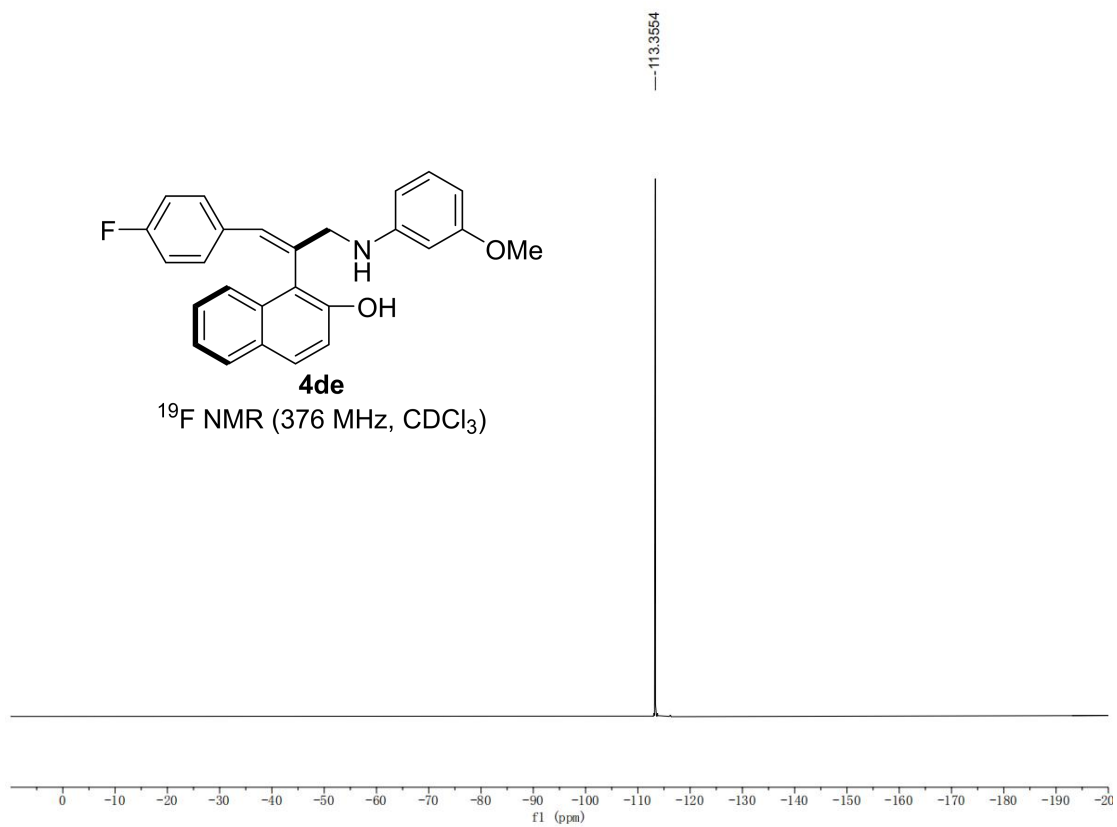

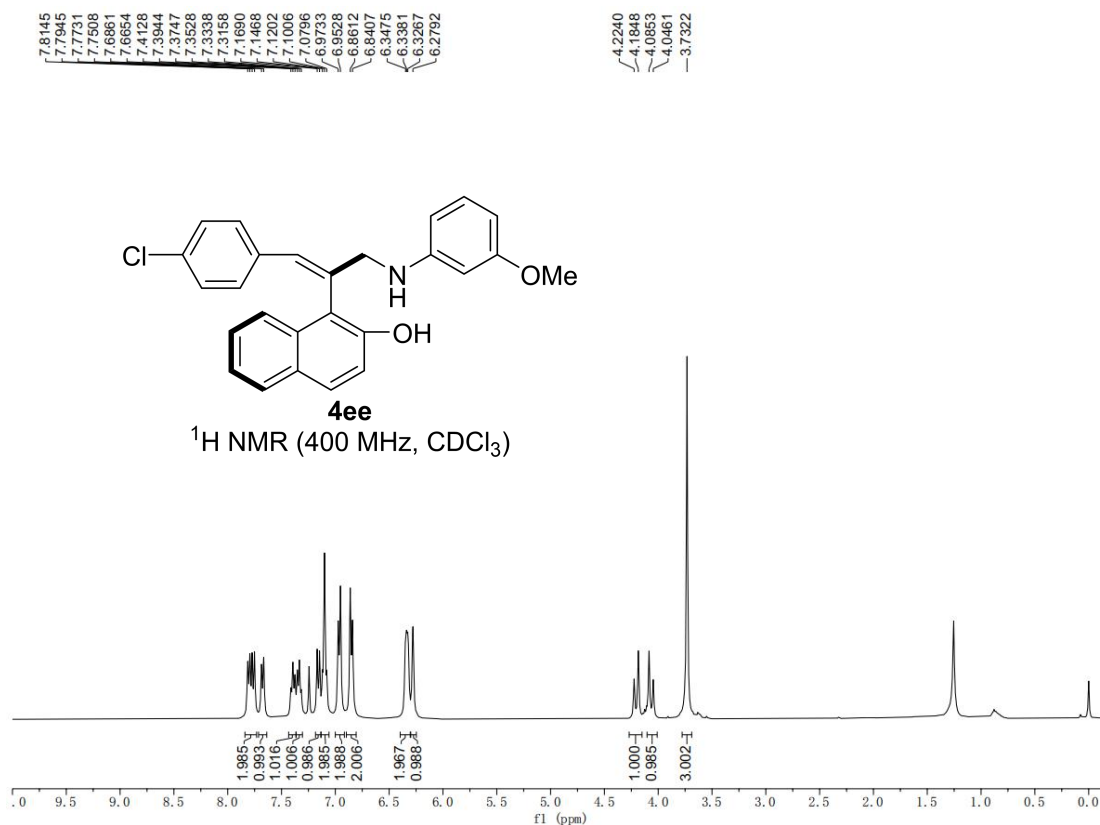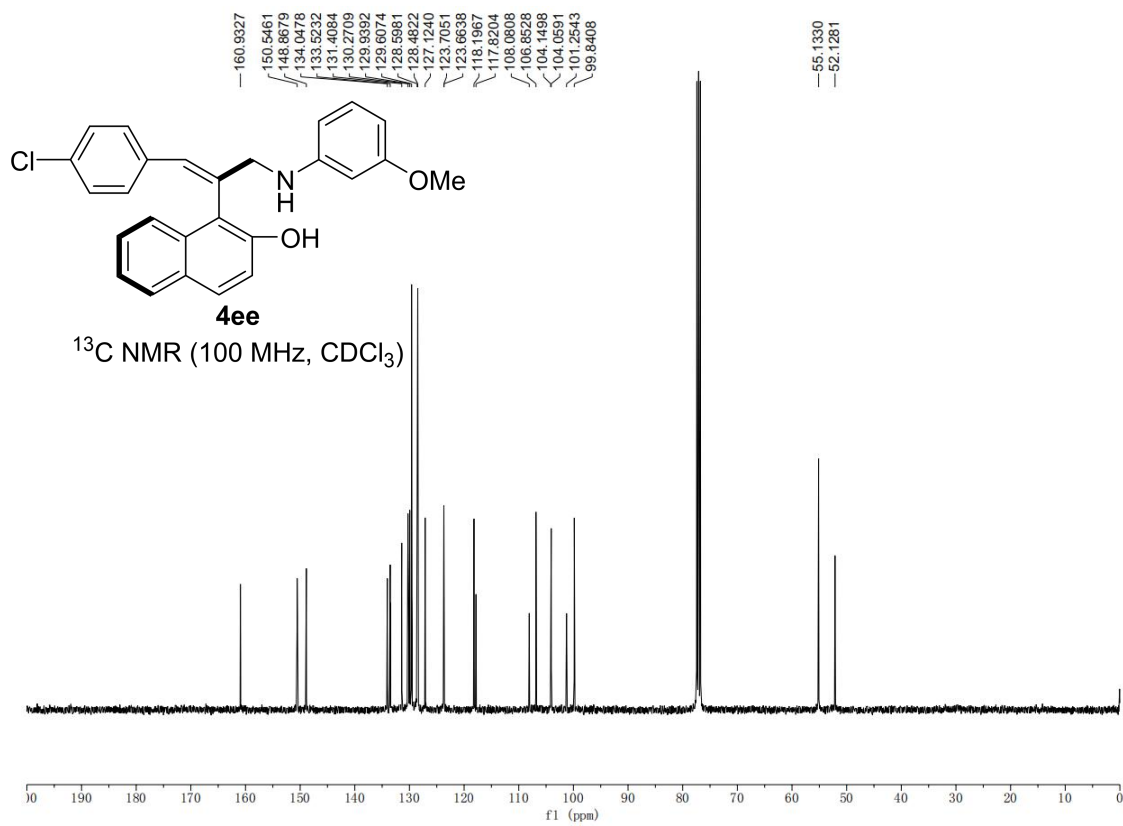



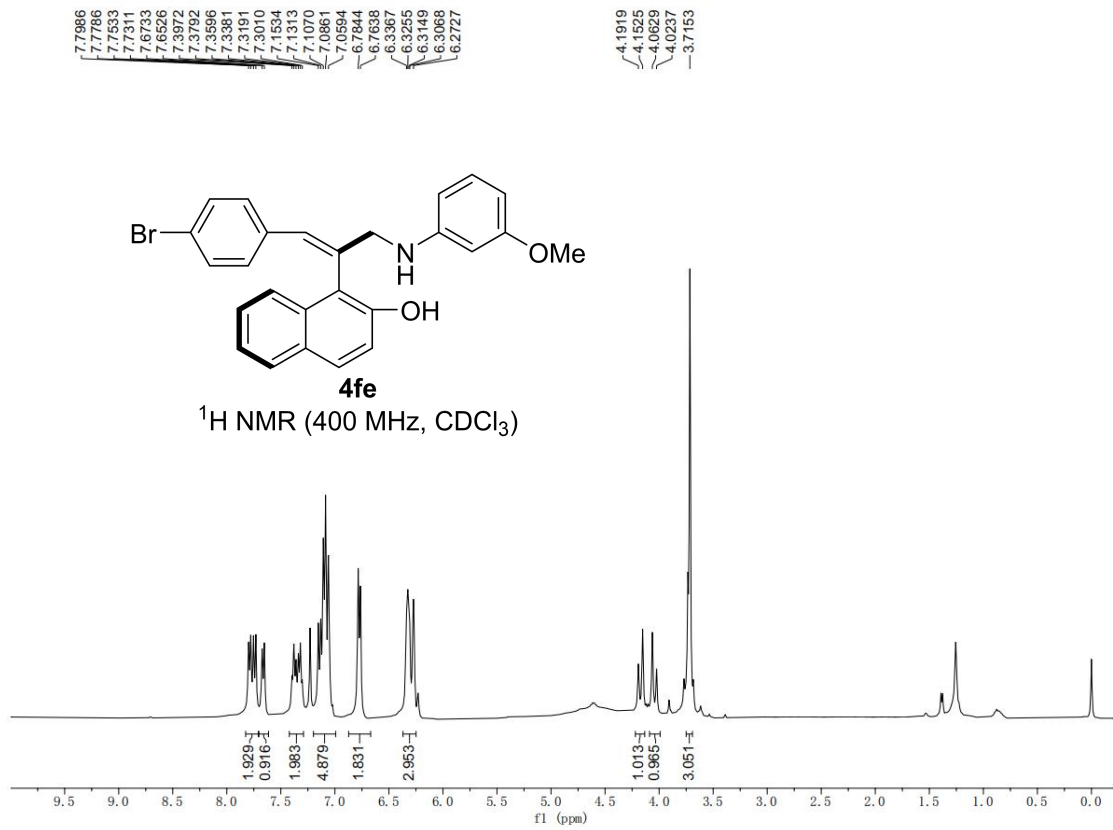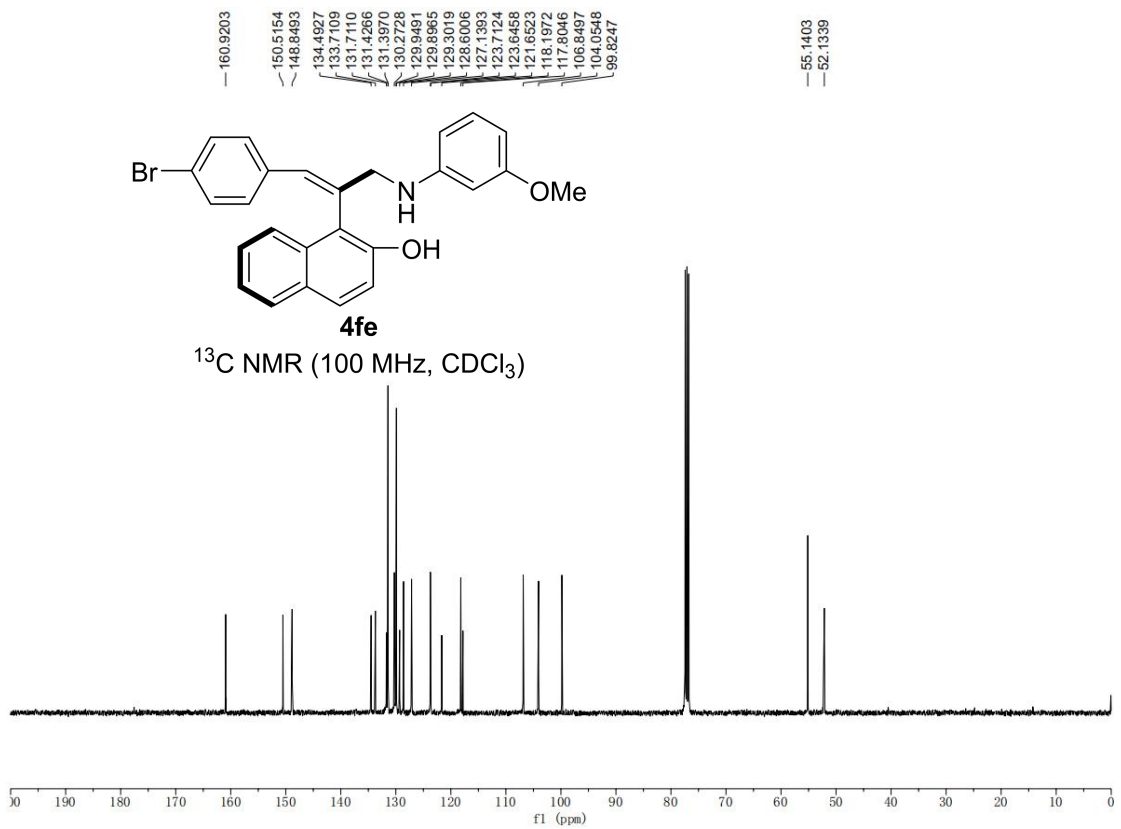

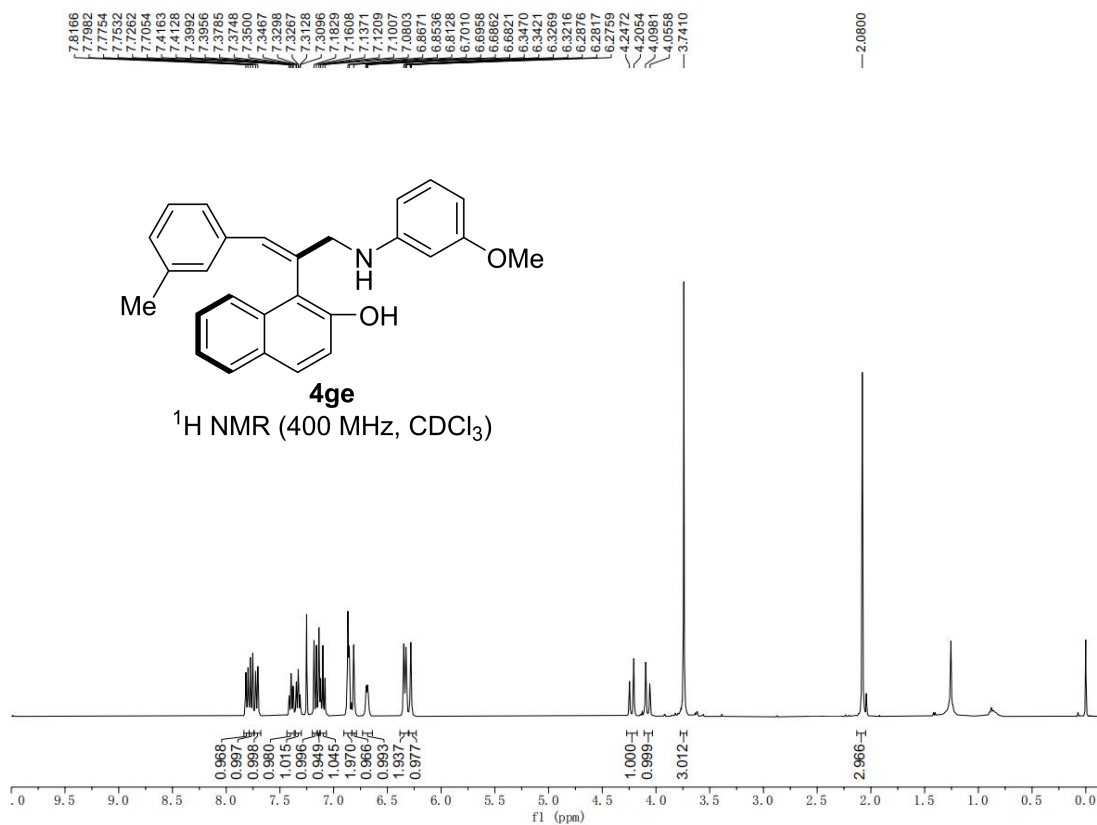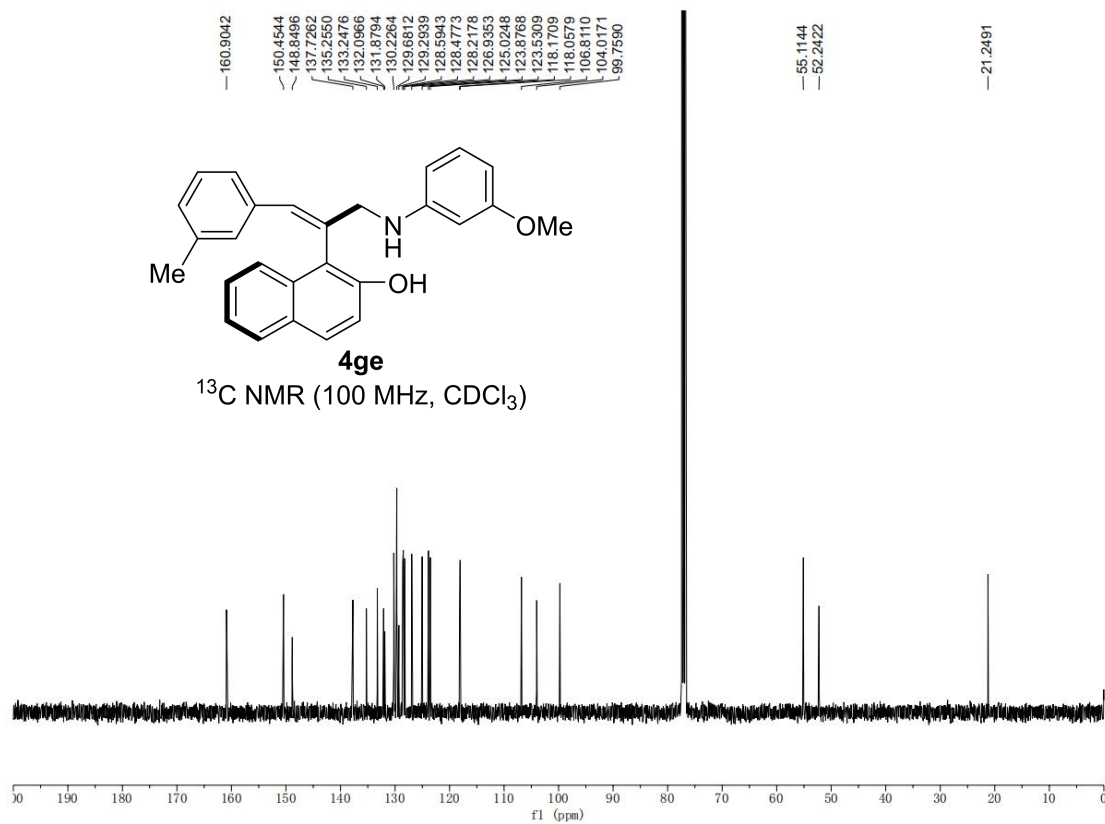

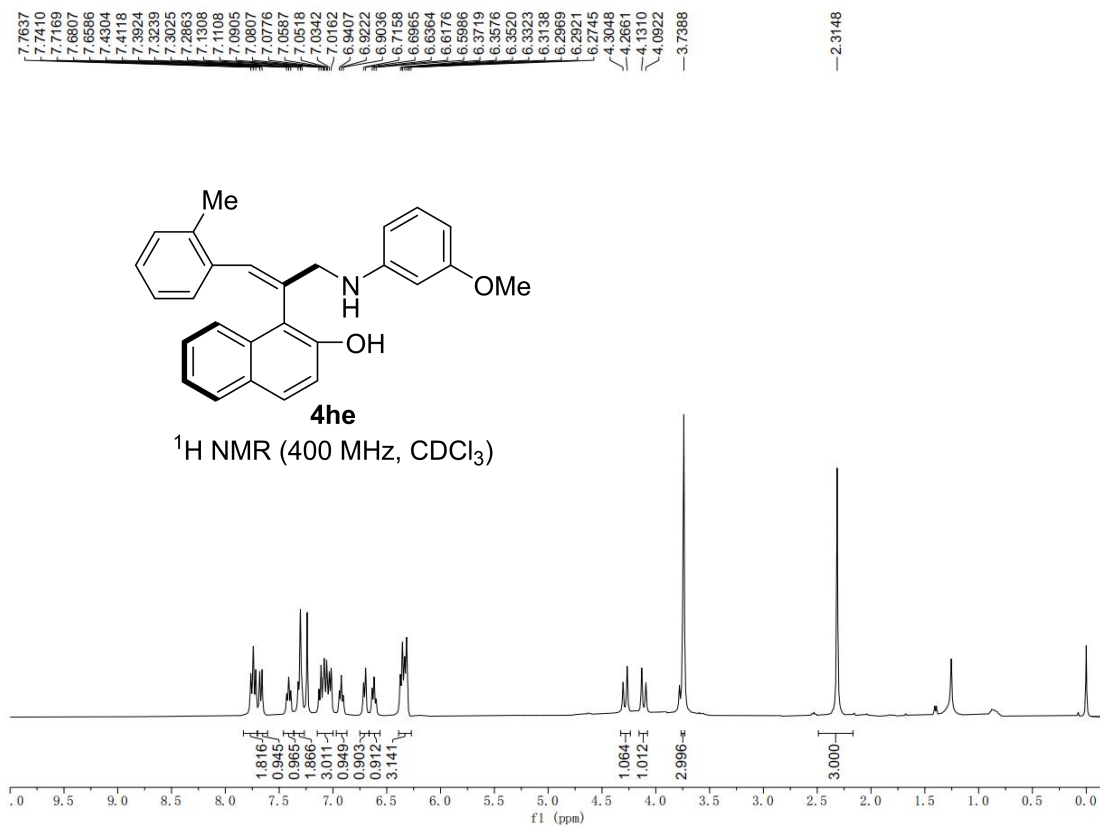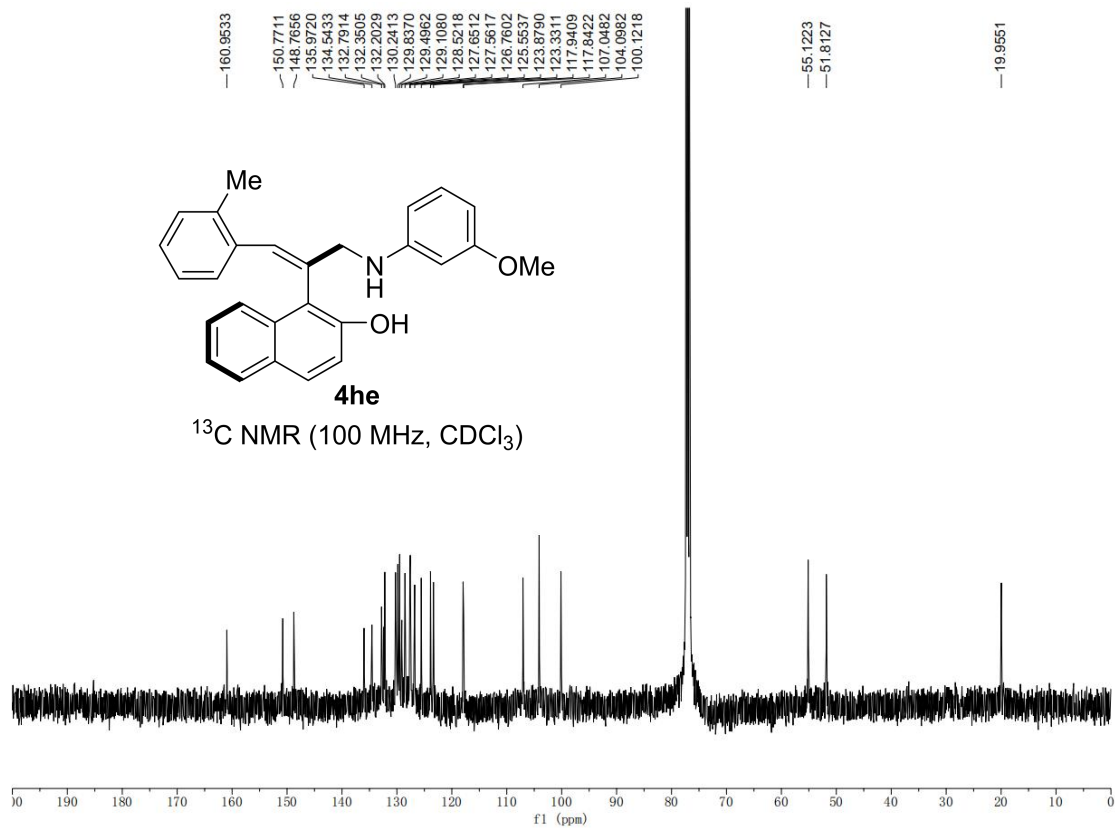

7.7838  
7.7815  
7.7795  
7.7631  
7.7597  
7.7337  
7.7124  
7.6944  
7.6921  
7.4126  
7.4091  
7.3956  
7.3918  
7.3746  
7.3305  
7.3102  
7.2932  
7.2902  
7.1460  
7.1236  
7.1150  
7.0948  
7.0746  
7.0130  
7.0087  
7.0055  
7.0017  
6.9882  
6.9839  
6.9746  
6.9700  
6.9413  
6.9380  
6.9203  
6.9153  
6.9117  
6.8943  
6.8911  
6.8847  
6.8803  
6.8653  
6.8609  
6.8458  
6.8414  
6.8275  
6.8521  
6.8331  
6.8299  
6.8598  
6.8540  
6.8396  
6.8338  
6.8048  
6.2991  
6.2934  
4.2852  
4.2821  
4.2468  
4.2438  
4.1330  
4.1293  
4.0946  
4.0910  
3.7273

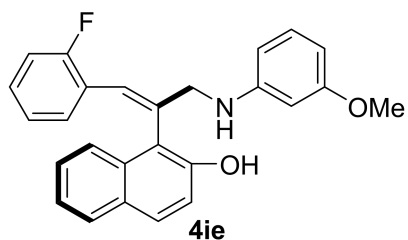

**4ie**  
<sup>1</sup>H NMR (400 MHz, CDCl<sub>3</sub>)

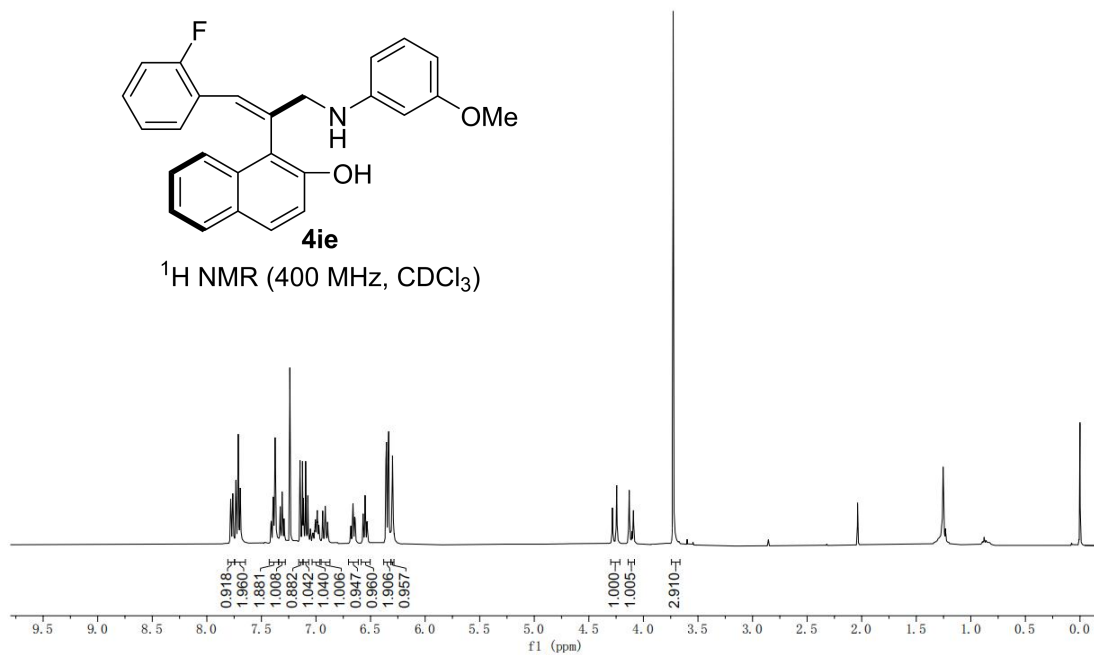

161.5565  
160.8946  
159.0695  
150.8740  
148.6631  
134.8222  
131.8350  
130.2525  
129.8553  
129.3345  
129.2502  
129.1800  
128.5009  
128.4627  
127.0095  
125.3312  
125.2731  
123.8188  
123.7834  
123.7140  
123.5449  
123.5092  
123.3809  
118.1938  
117.7292  
115.1916  
114.9708  
107.1149  
104.5615  
100.0152  
56.1150  
52.5230

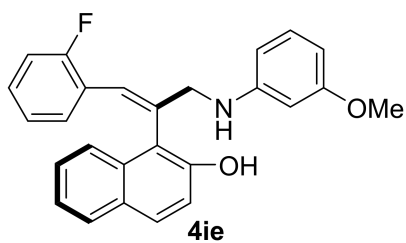

**4ie**  
<sup>13</sup>C NMR (100 MHz, CDCl<sub>3</sub>)

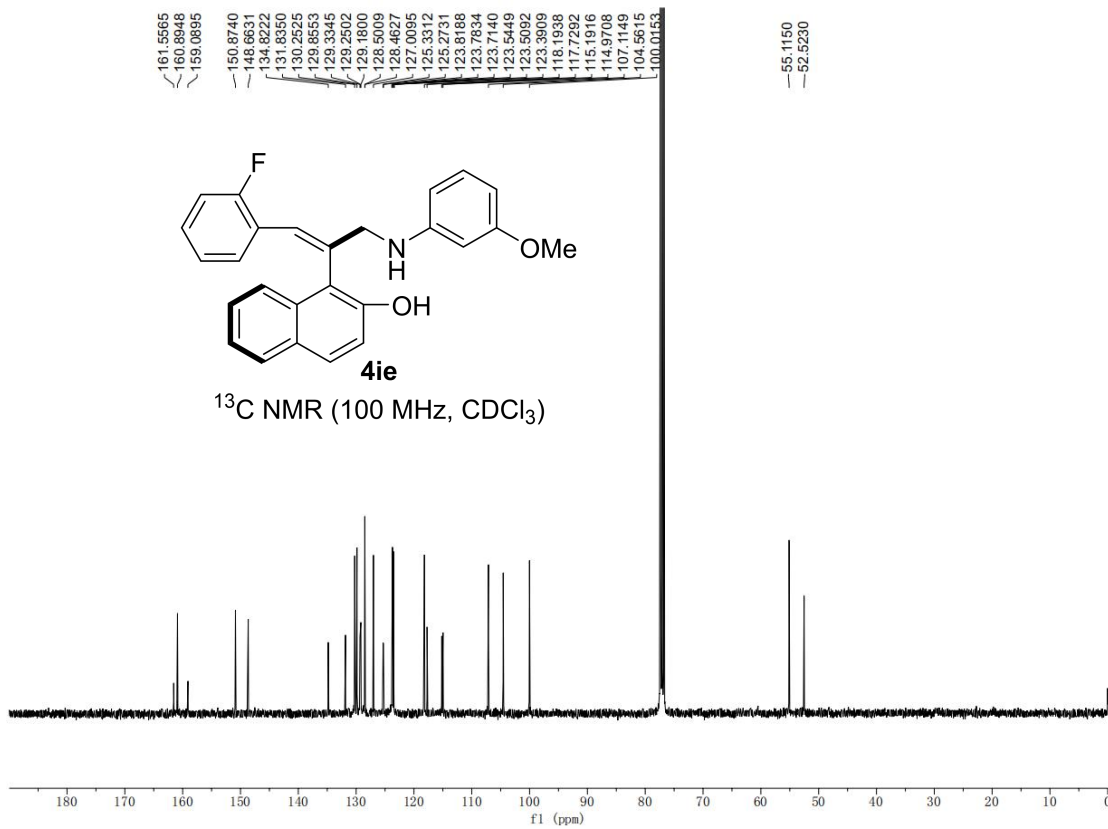

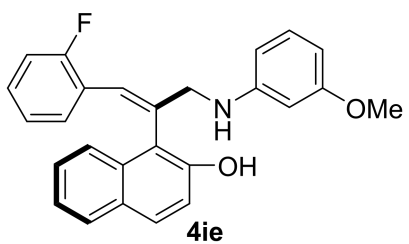

$^{19}\text{F}$  NMR (376 MHz,  $\text{CDCl}_3$ )

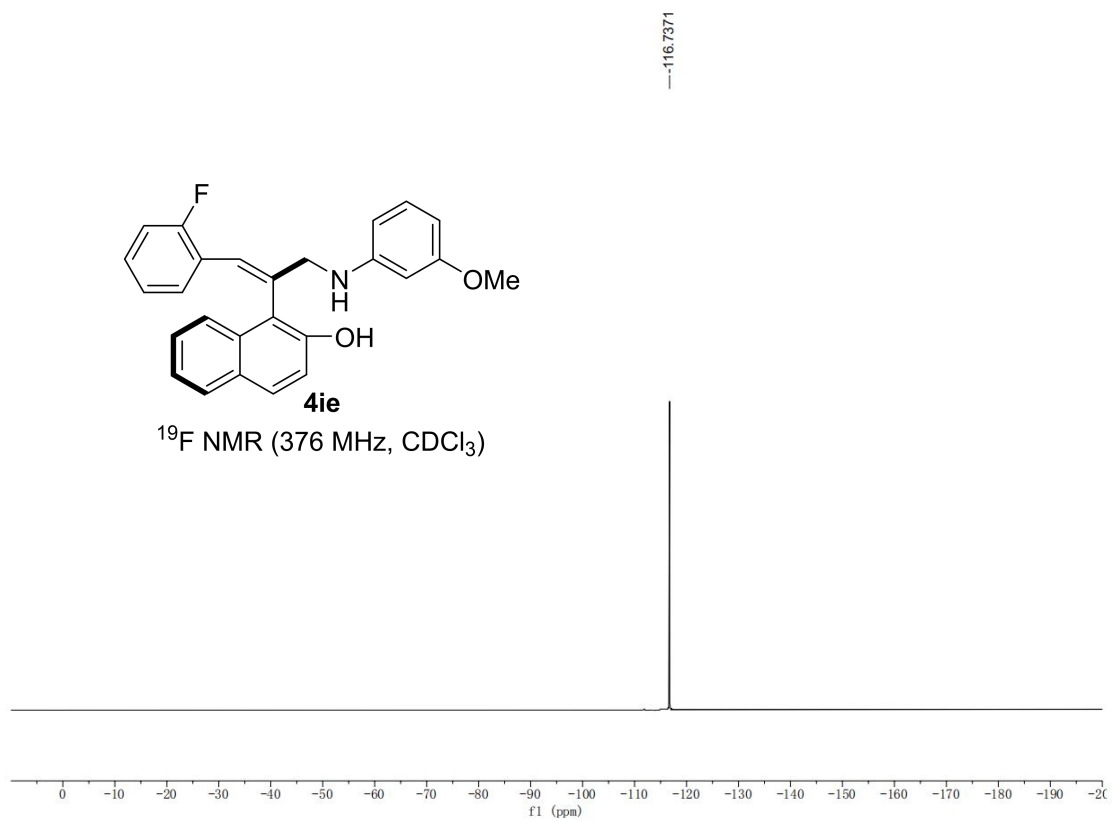

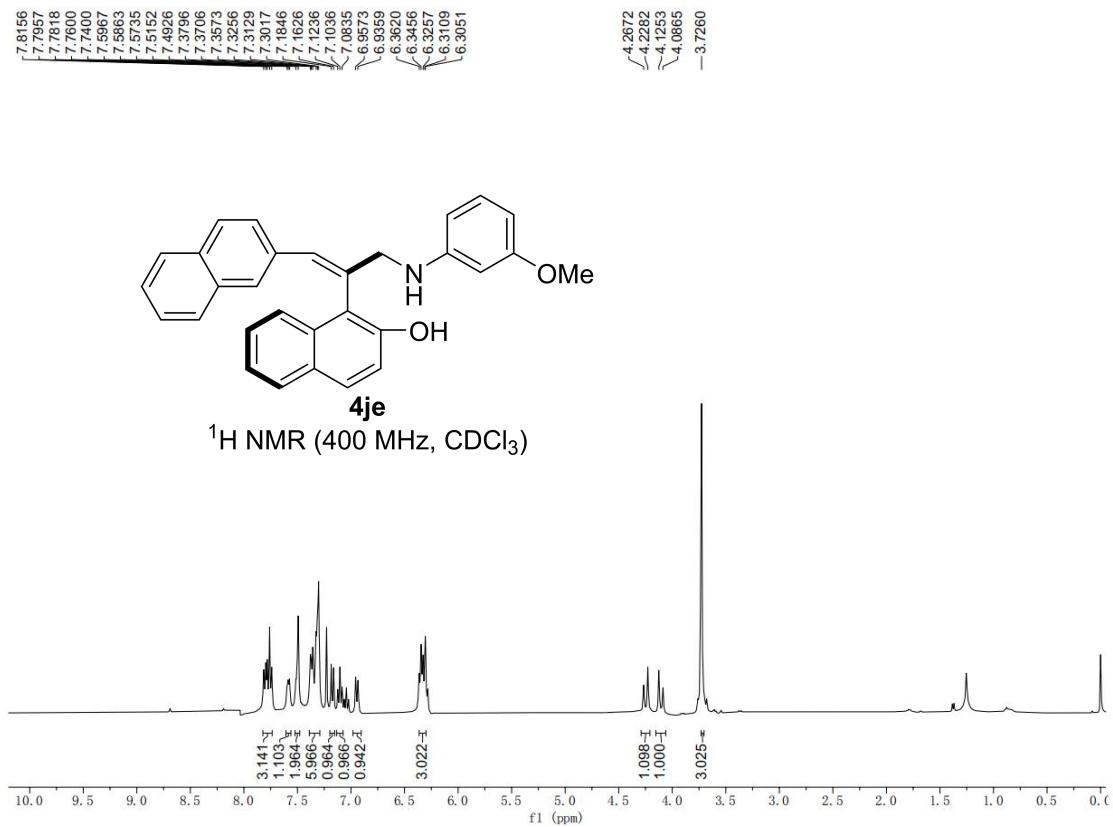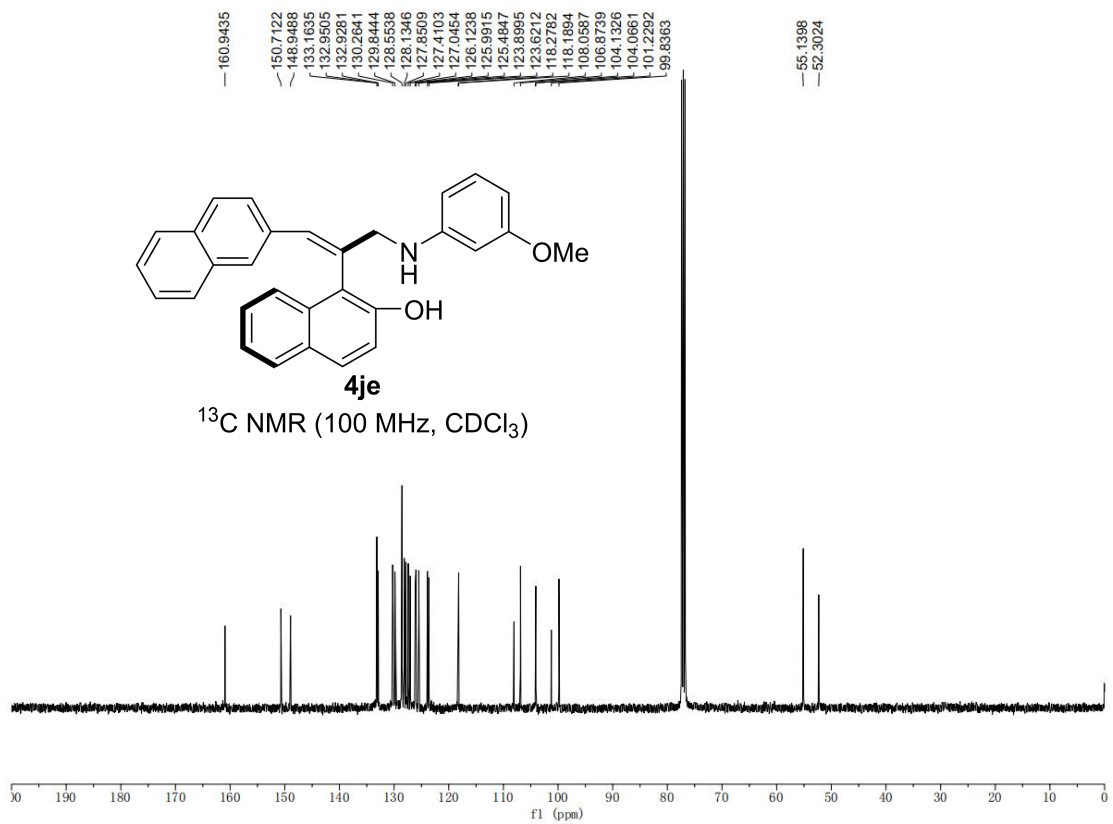

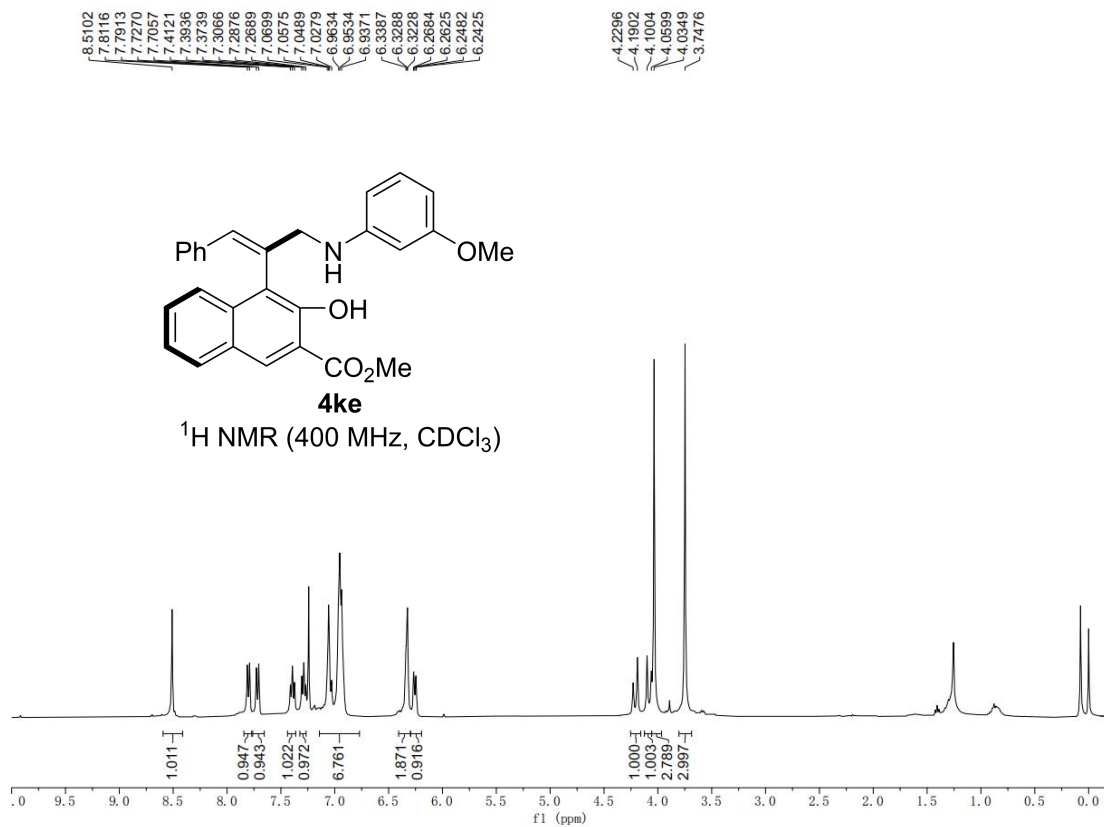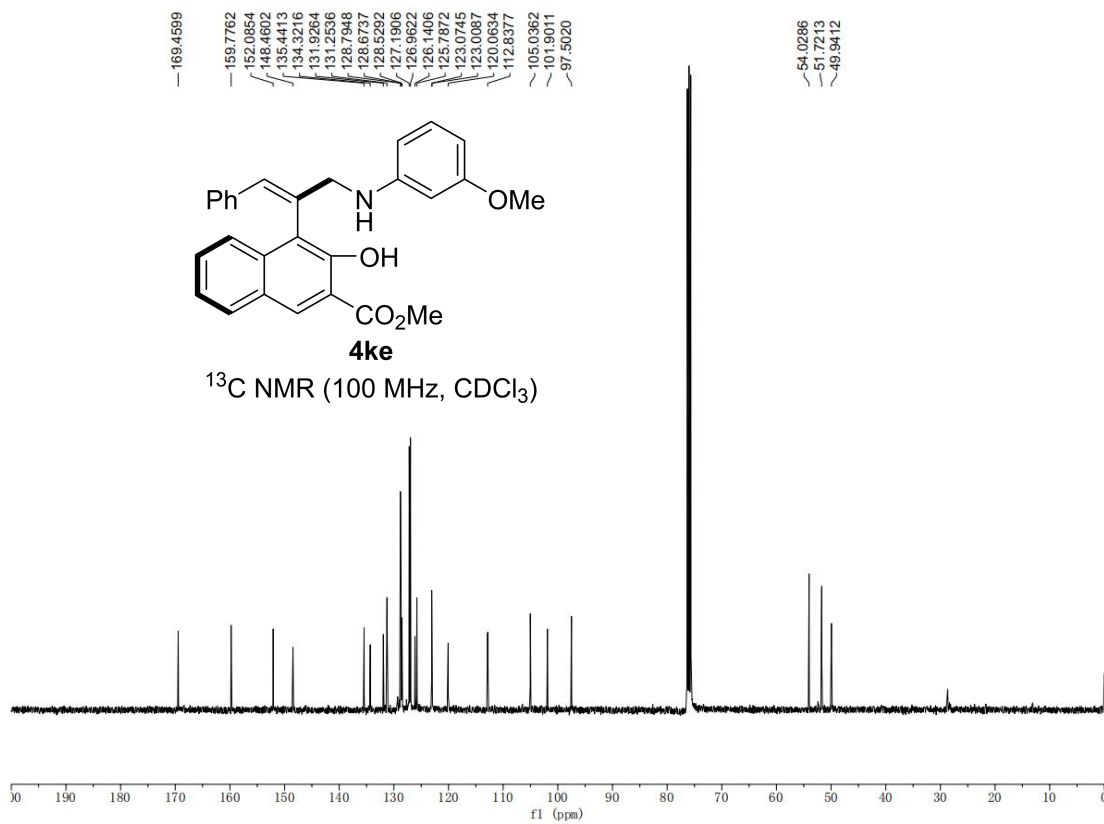

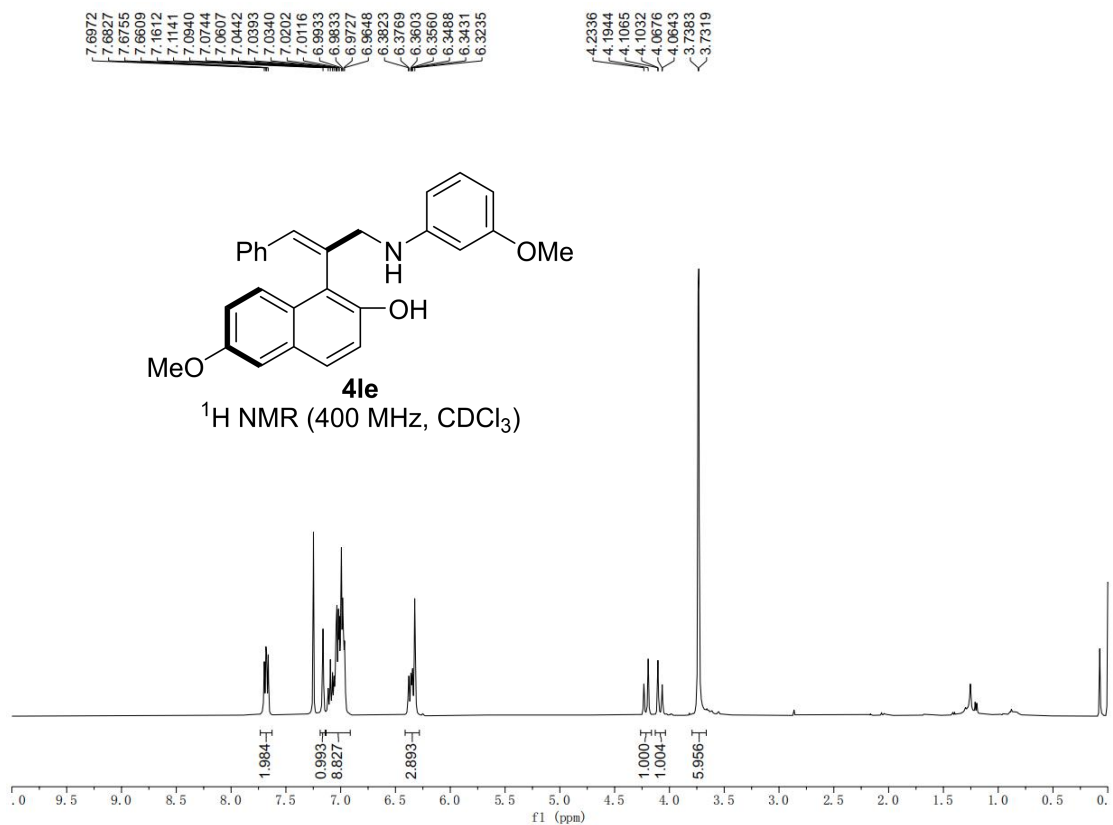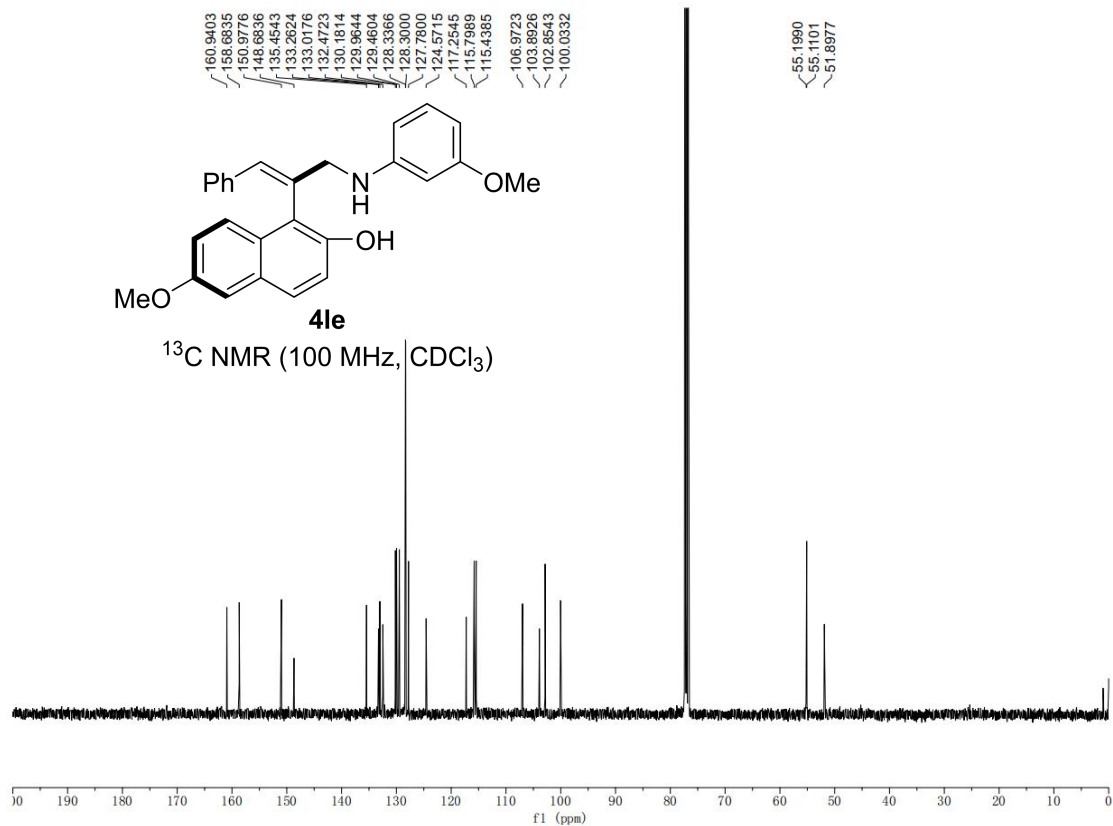



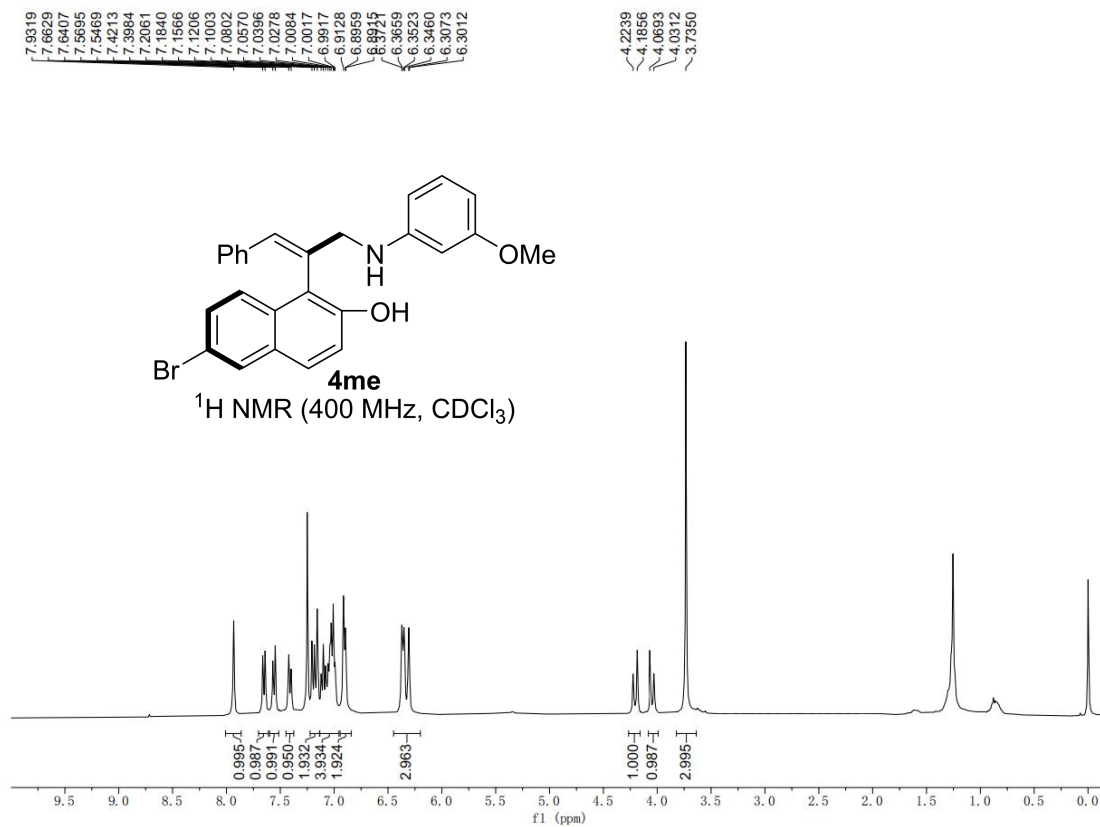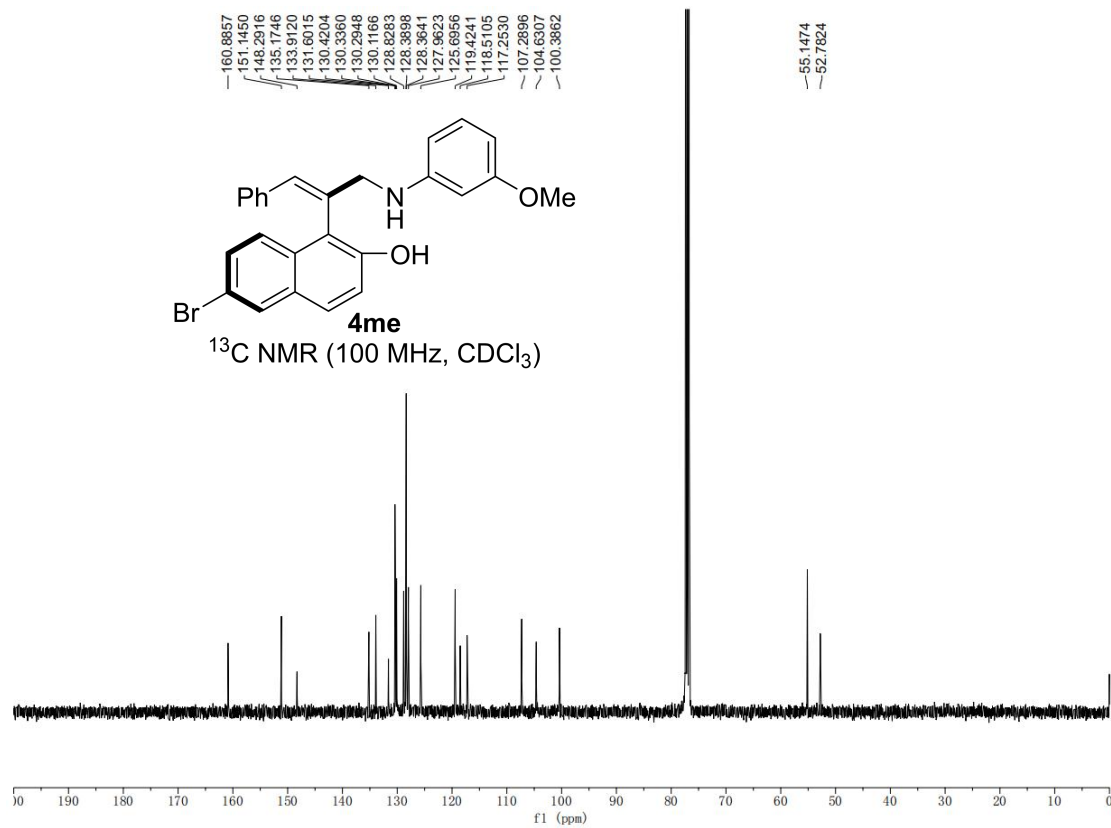

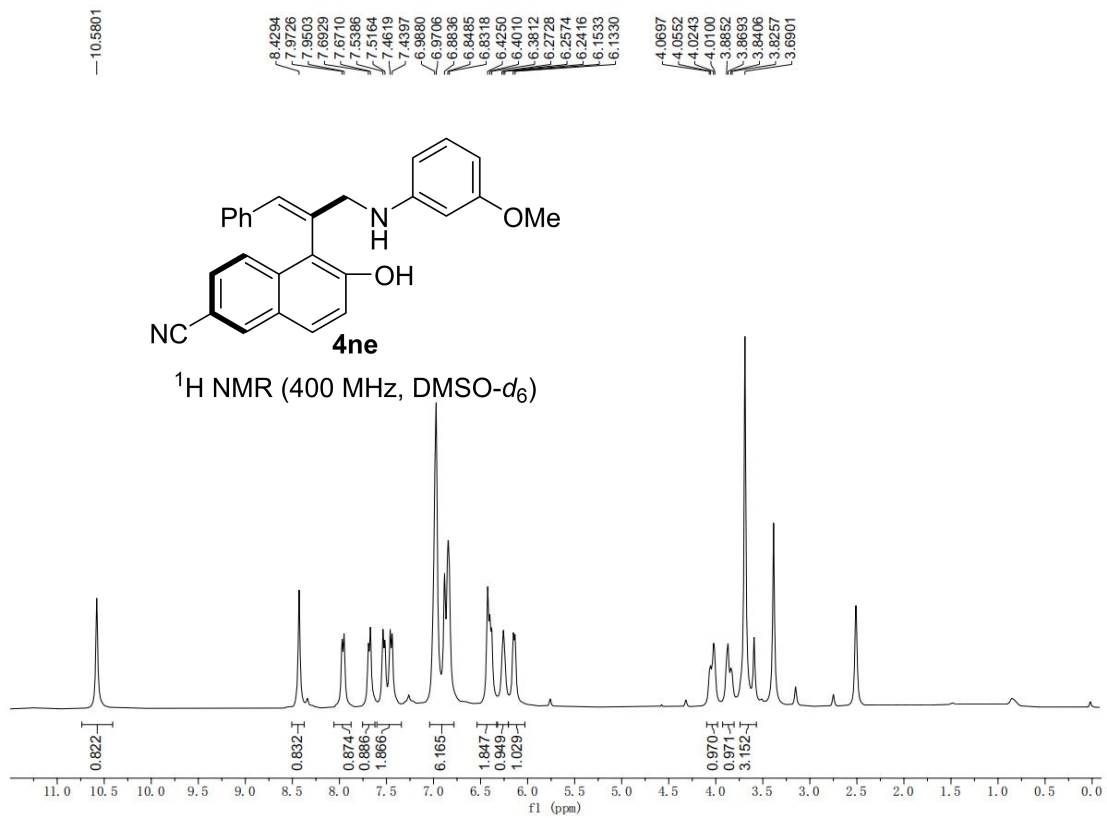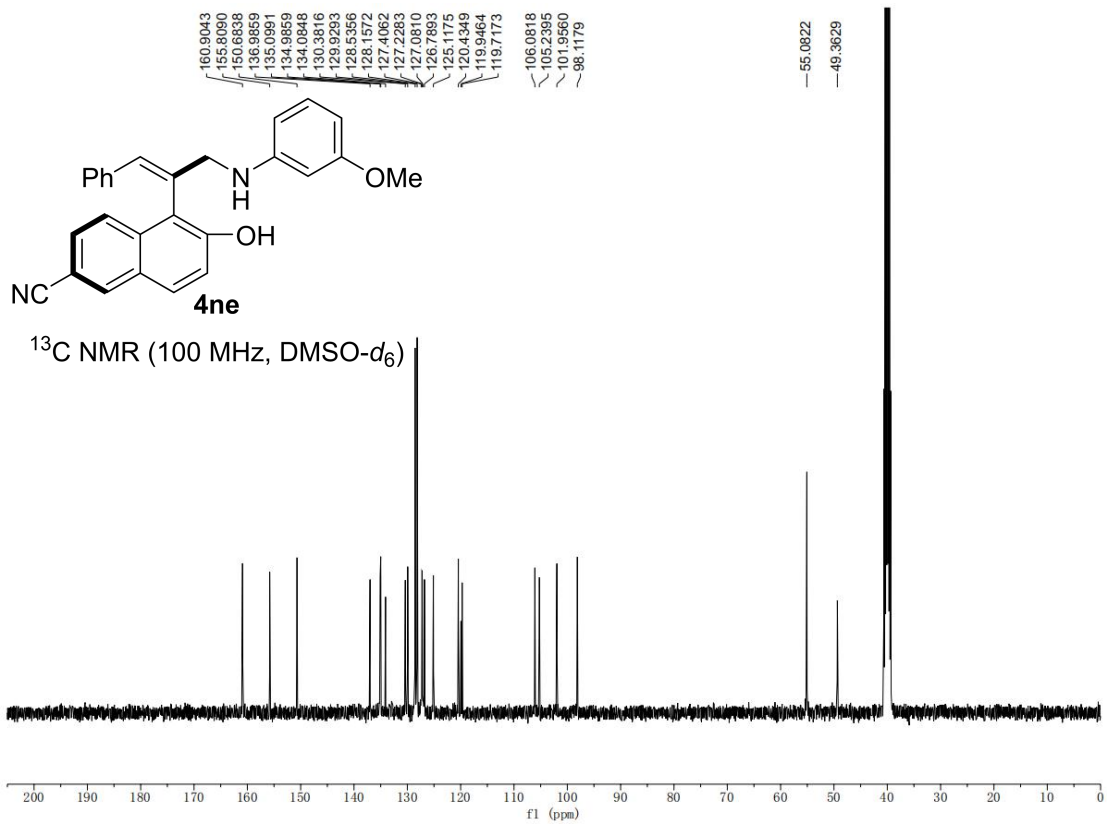

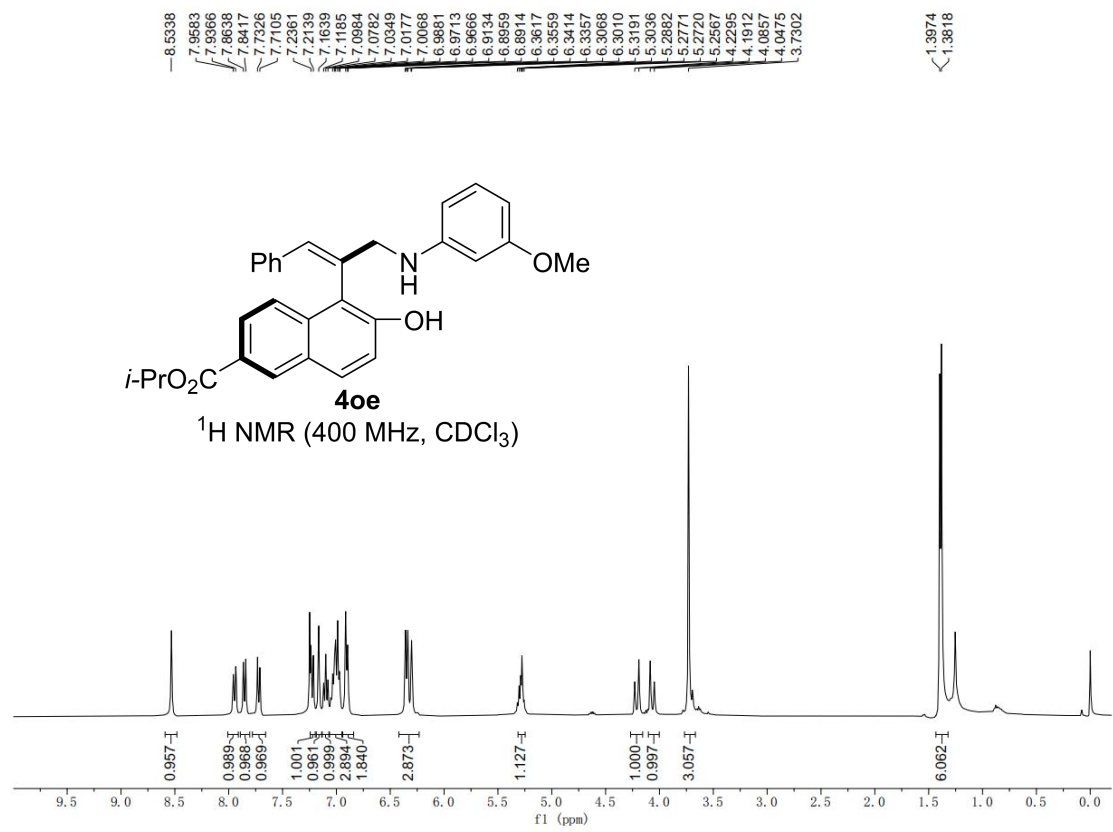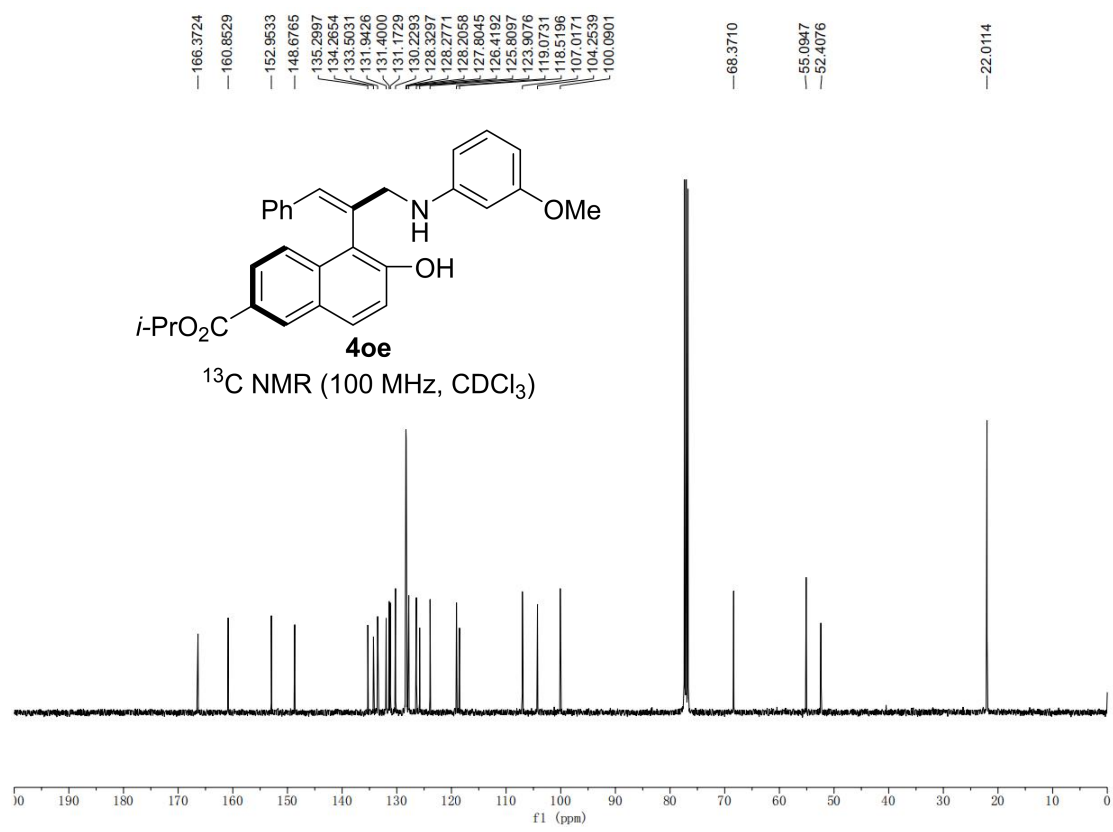

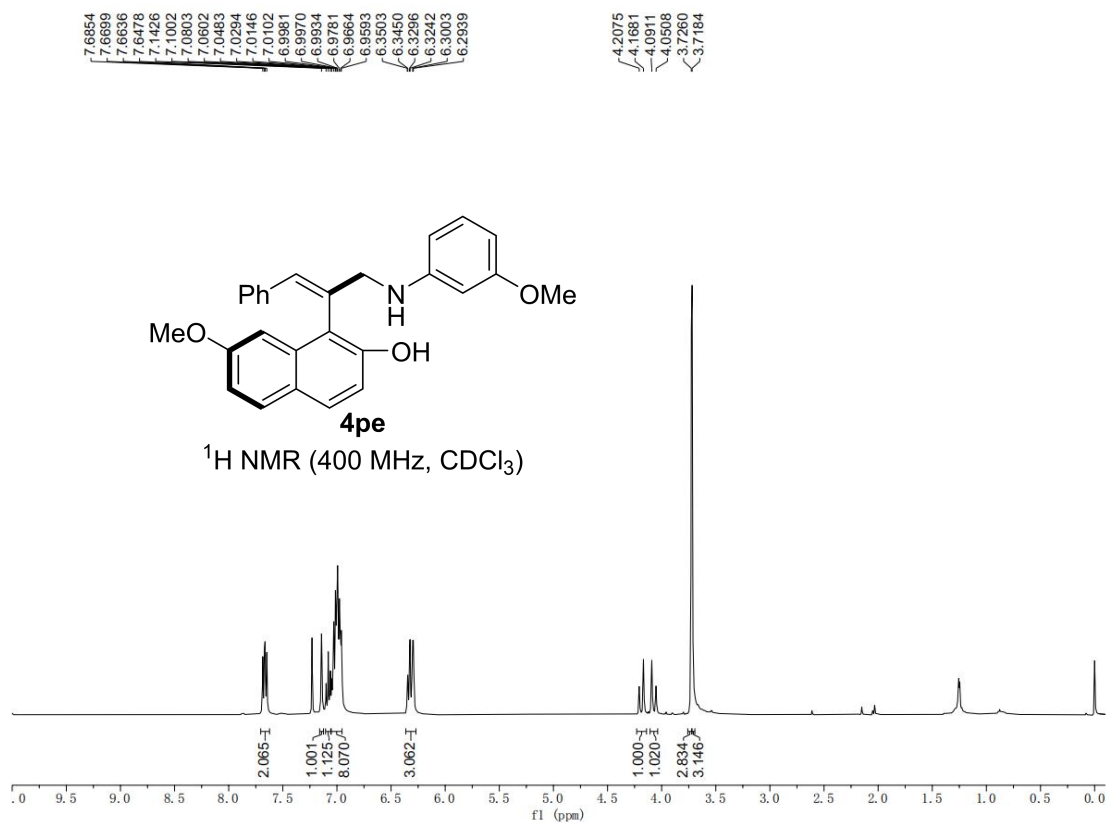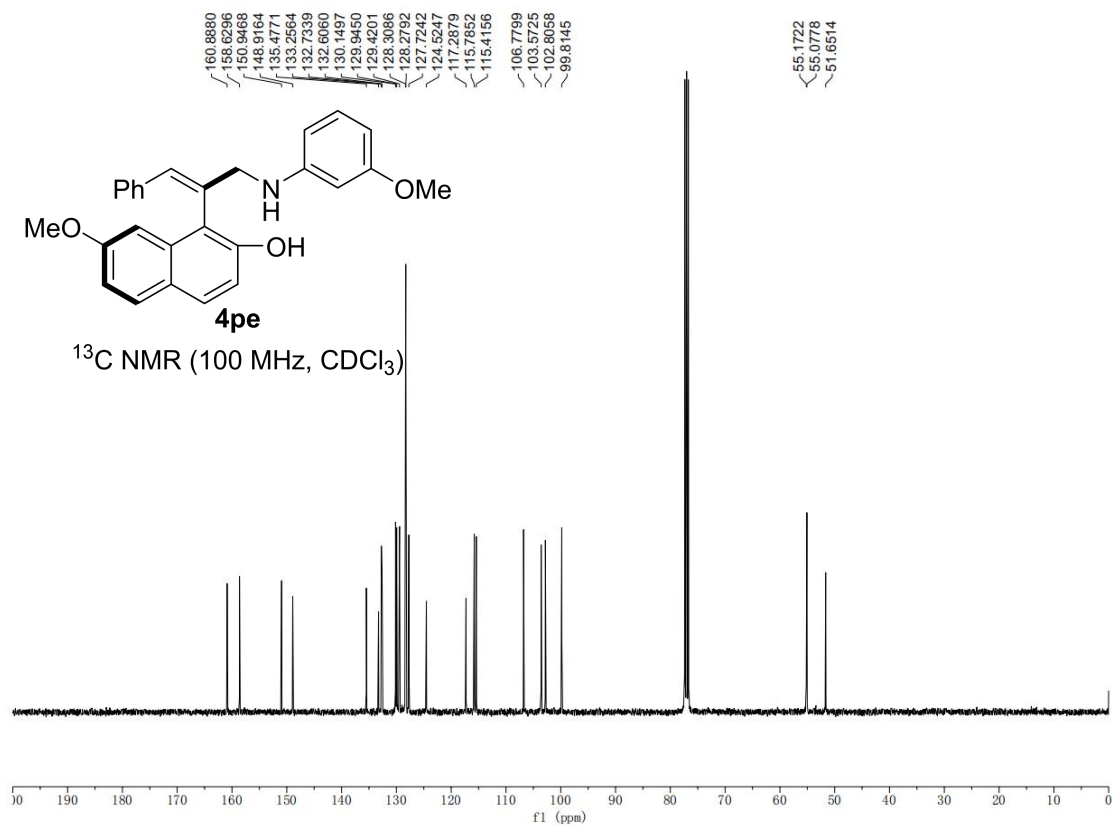

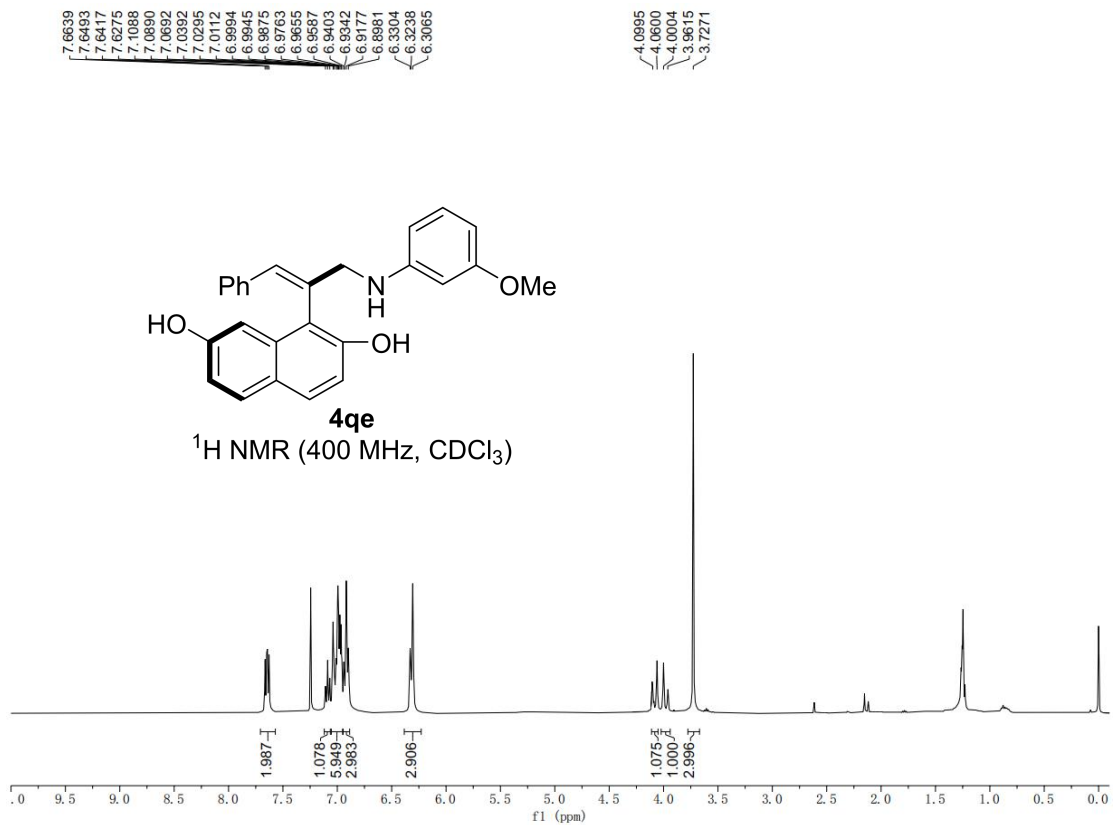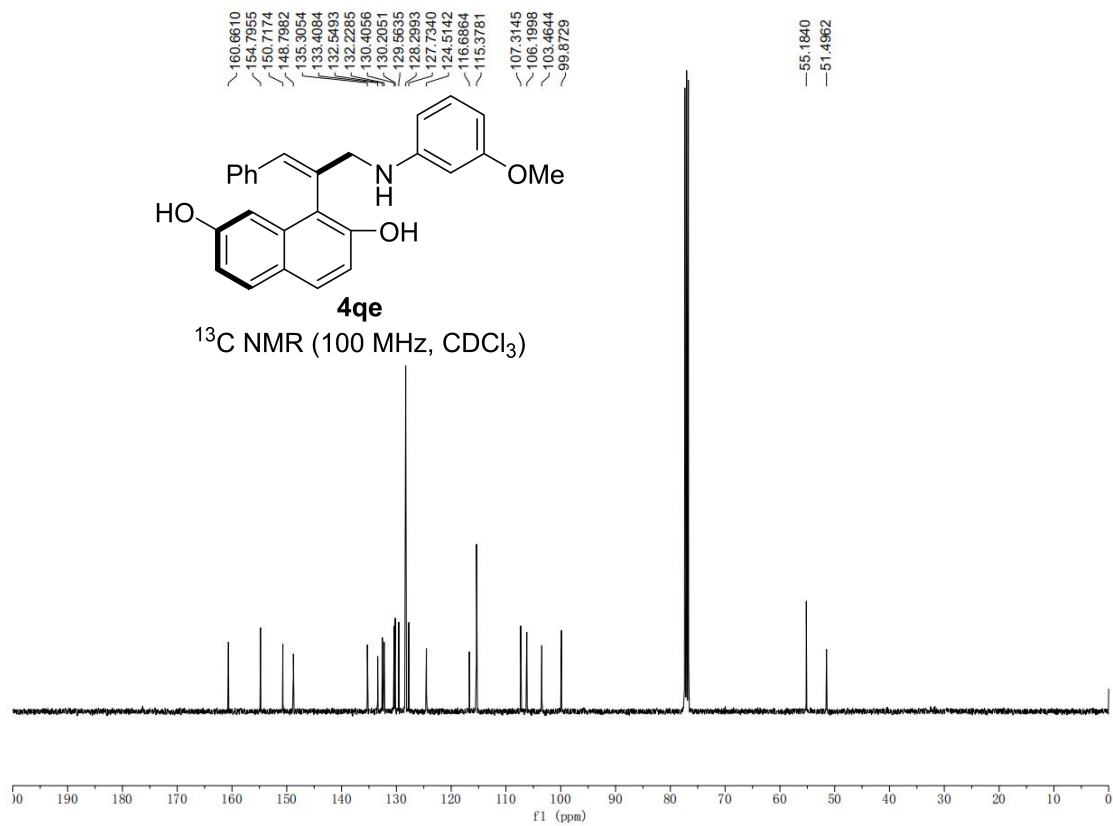

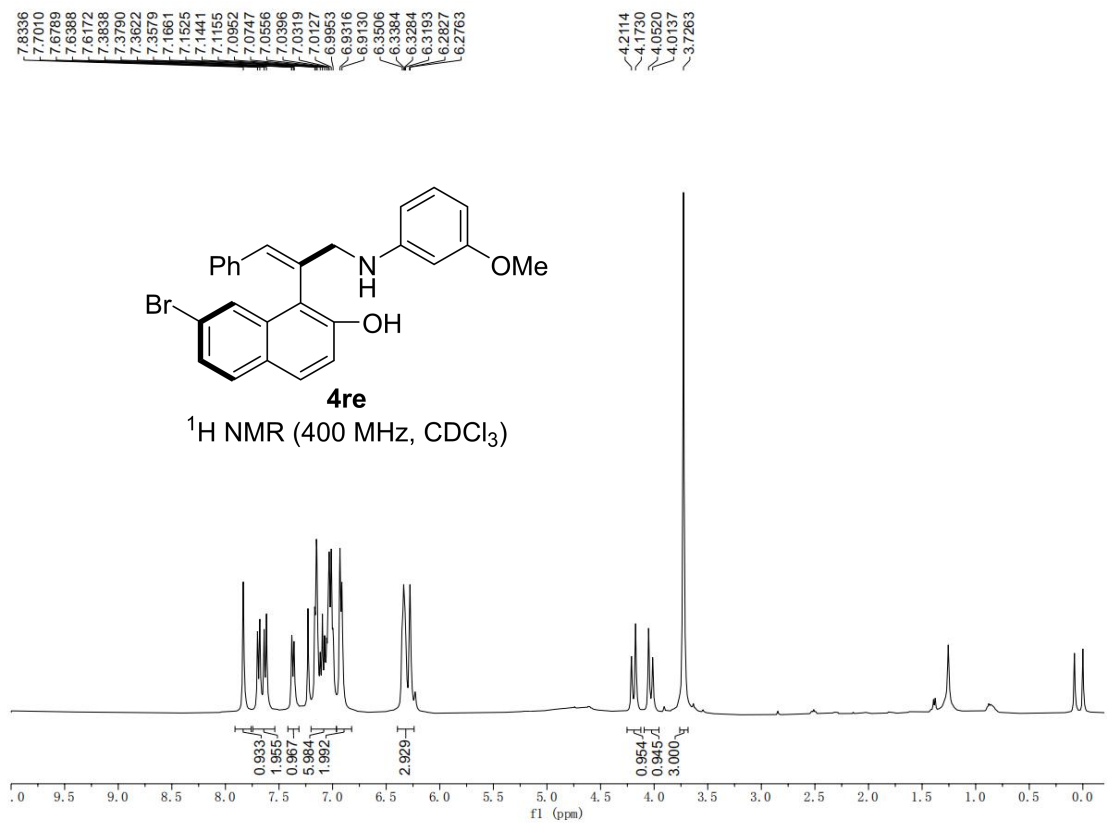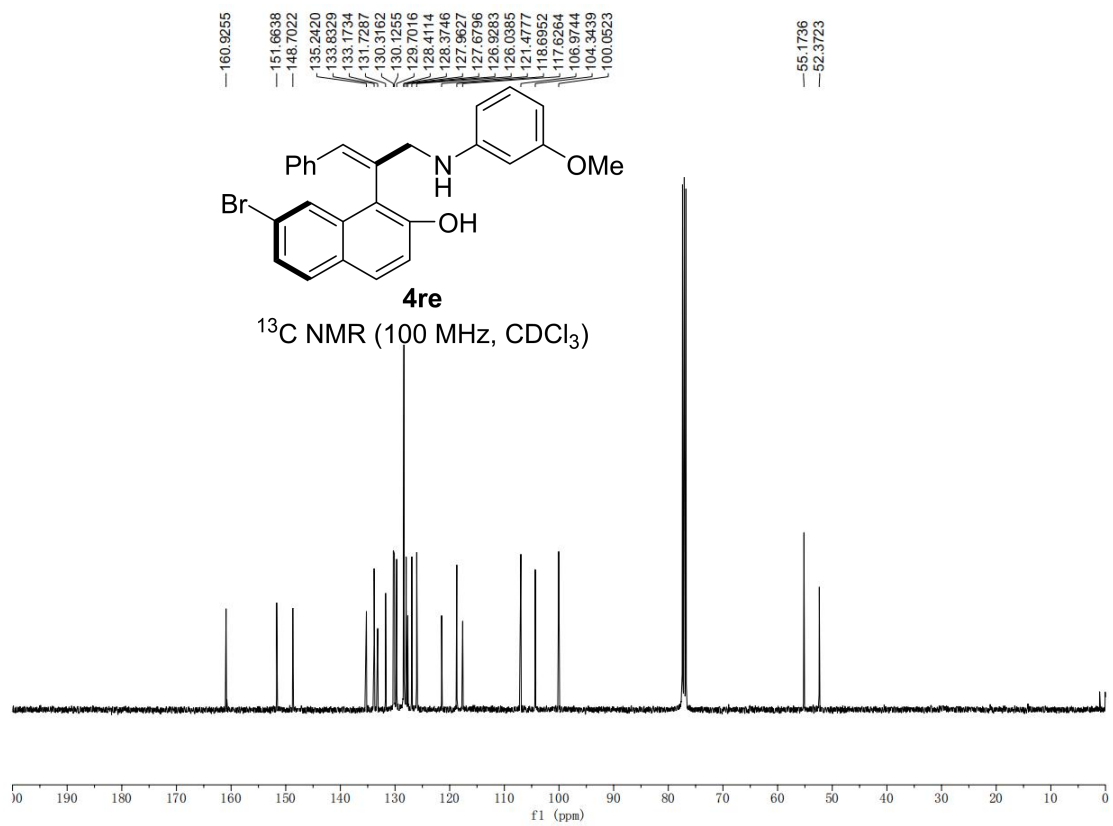

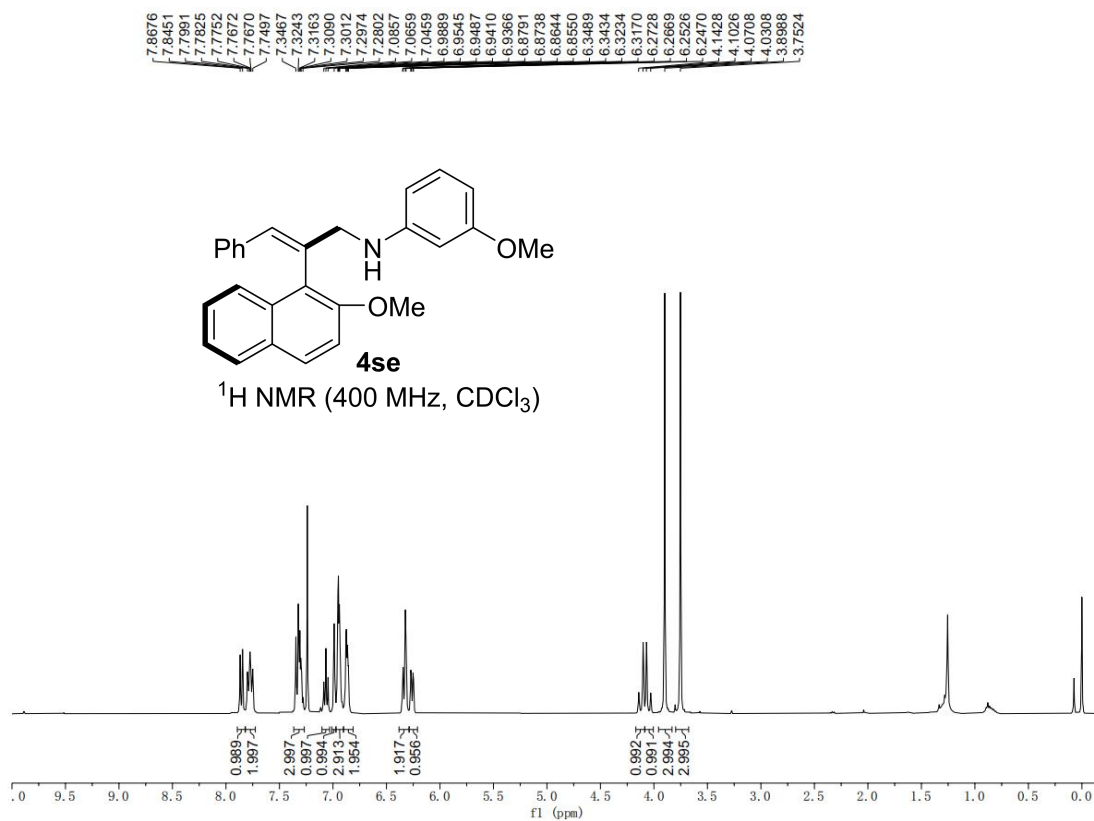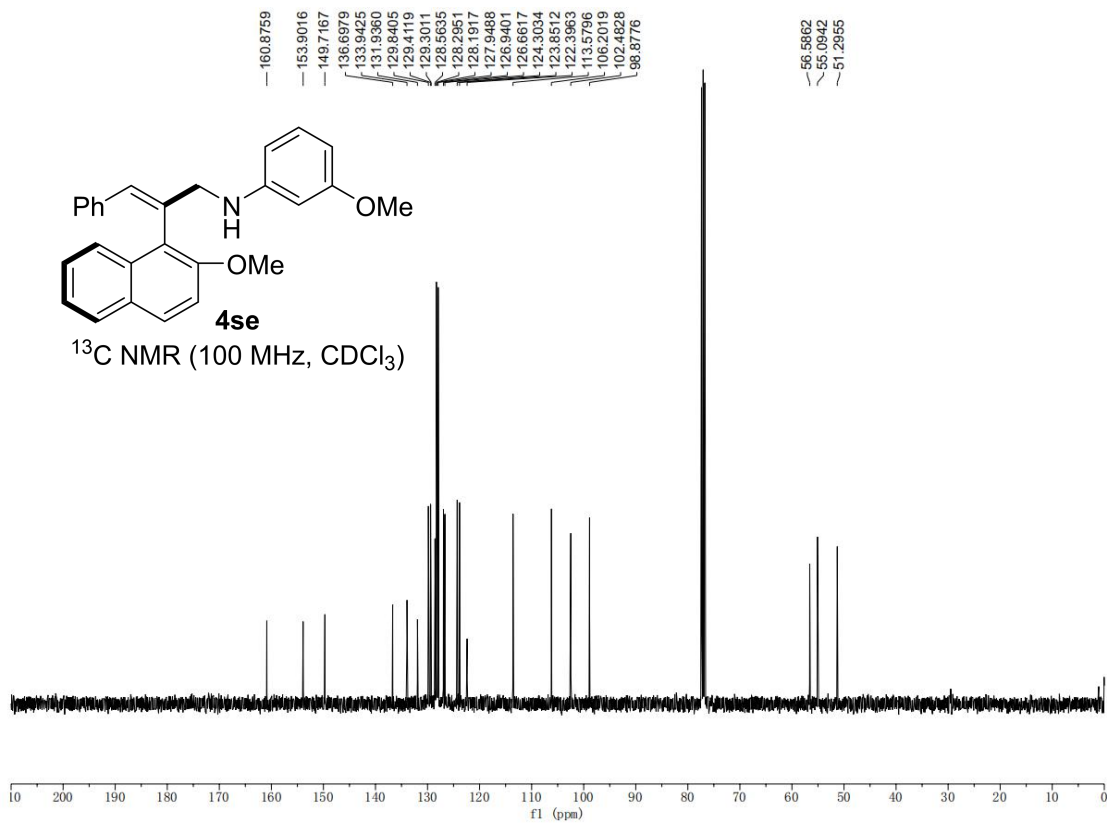

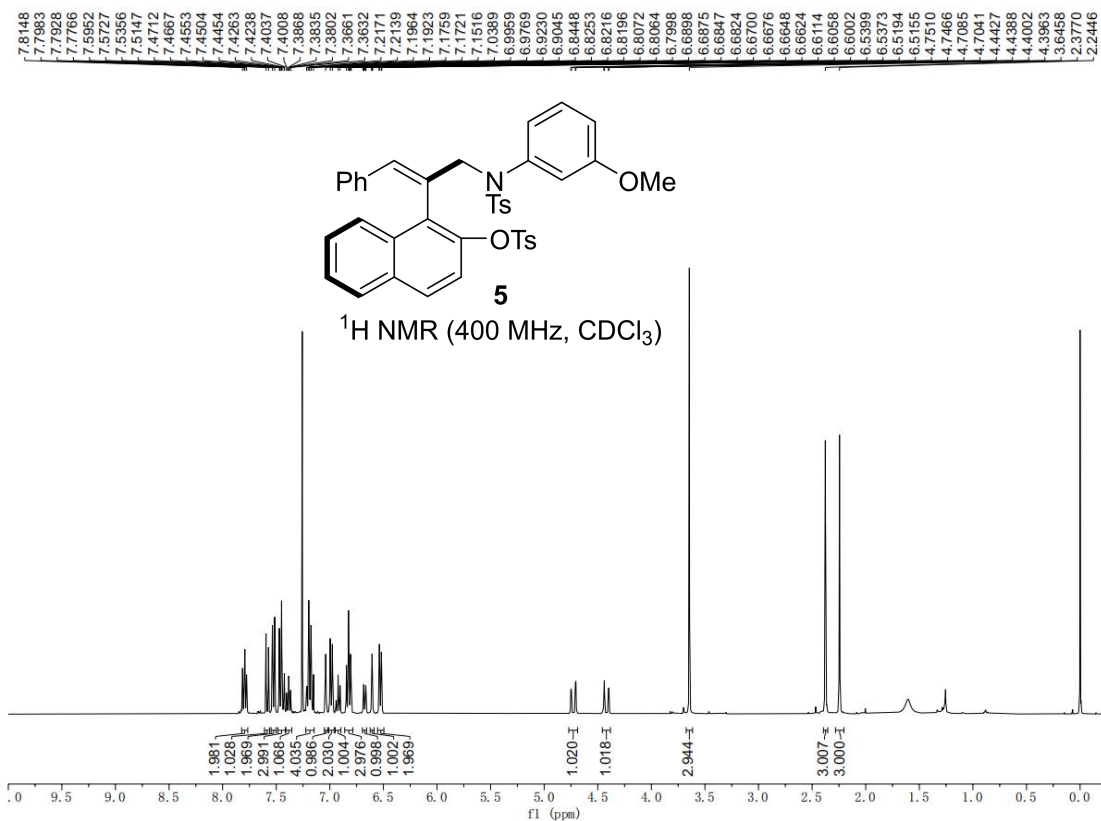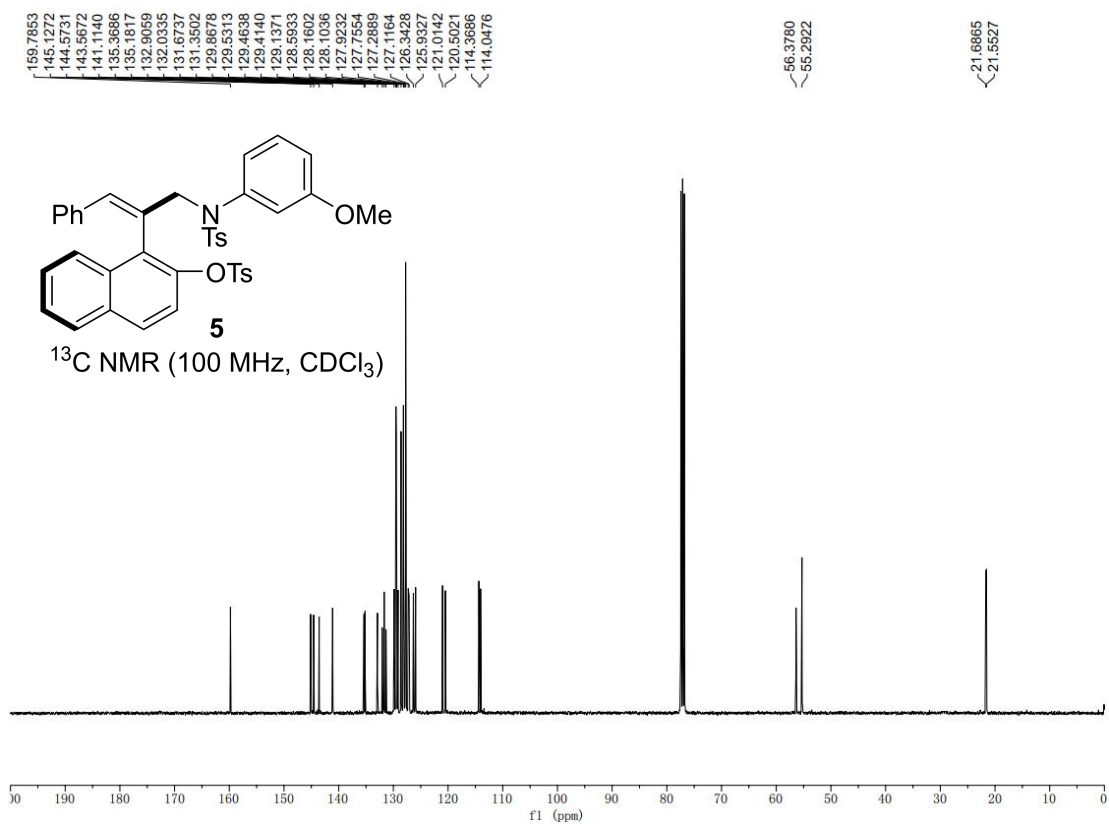



## HPLC Traces

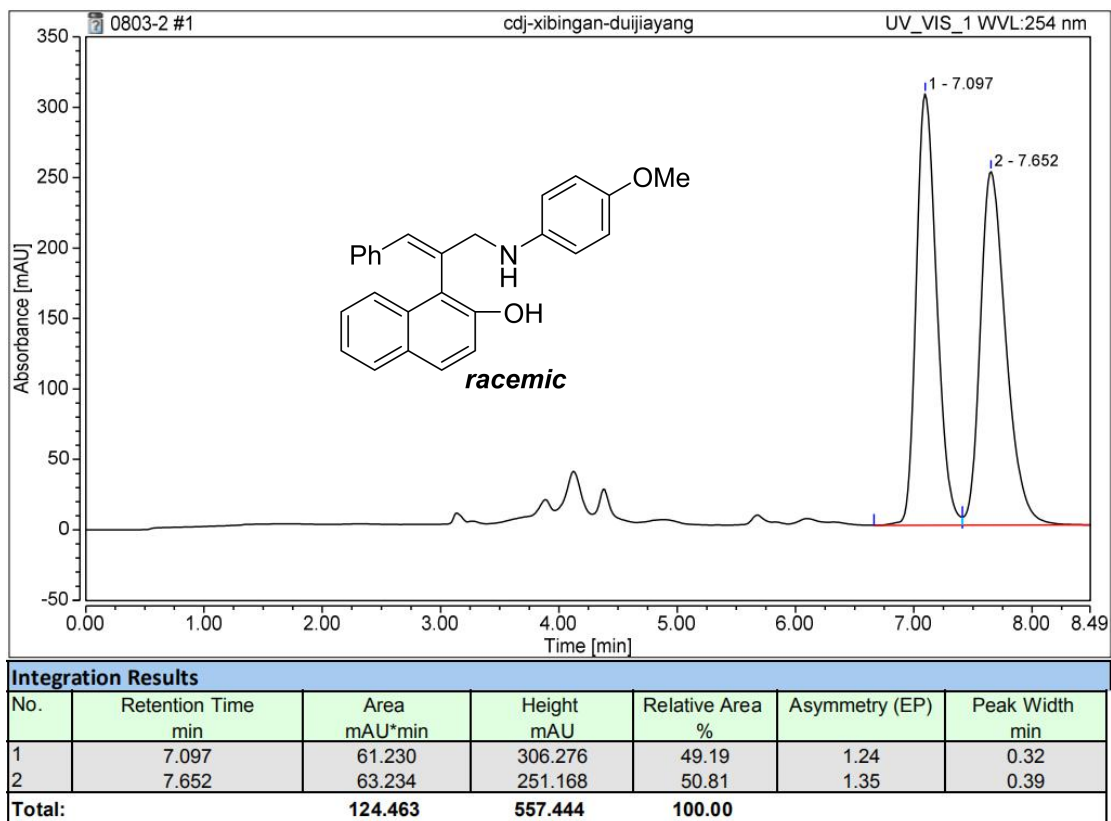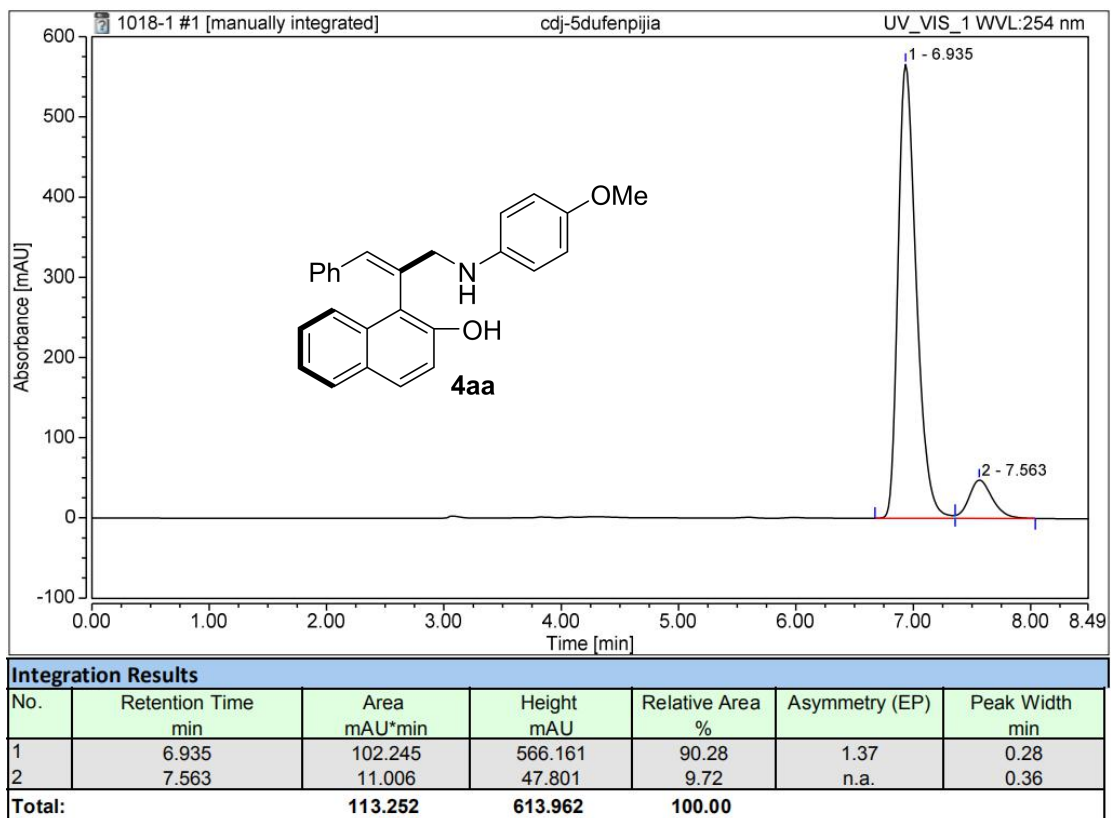

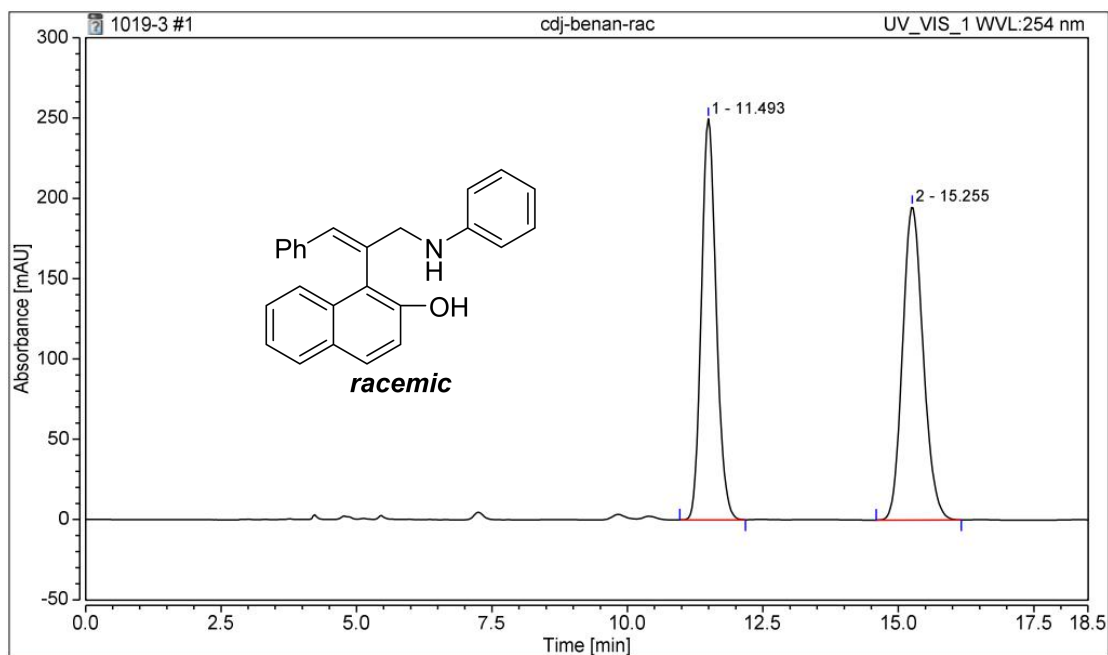

| Integration Results |                       |                 |                |                    |                |                   |
|---------------------|-----------------------|-----------------|----------------|--------------------|----------------|-------------------|
| No.                 | Retention Time<br>min | Area<br>mAU*min | Height<br>mAU  | Relative Area<br>% | Asymmetry (EP) | Peak Width<br>min |
| 1                   | 11.493                | 79.479          | 249.869        | 48.00              | 1.15           | 0.50              |
| 2                   | 15.255                | 86.088          | 195.330        | 52.00              | 1.15           | 0.69              |
| <b>Total:</b>       |                       | <b>165.567</b>  | <b>445.199</b> | <b>100.00</b>      |                |                   |

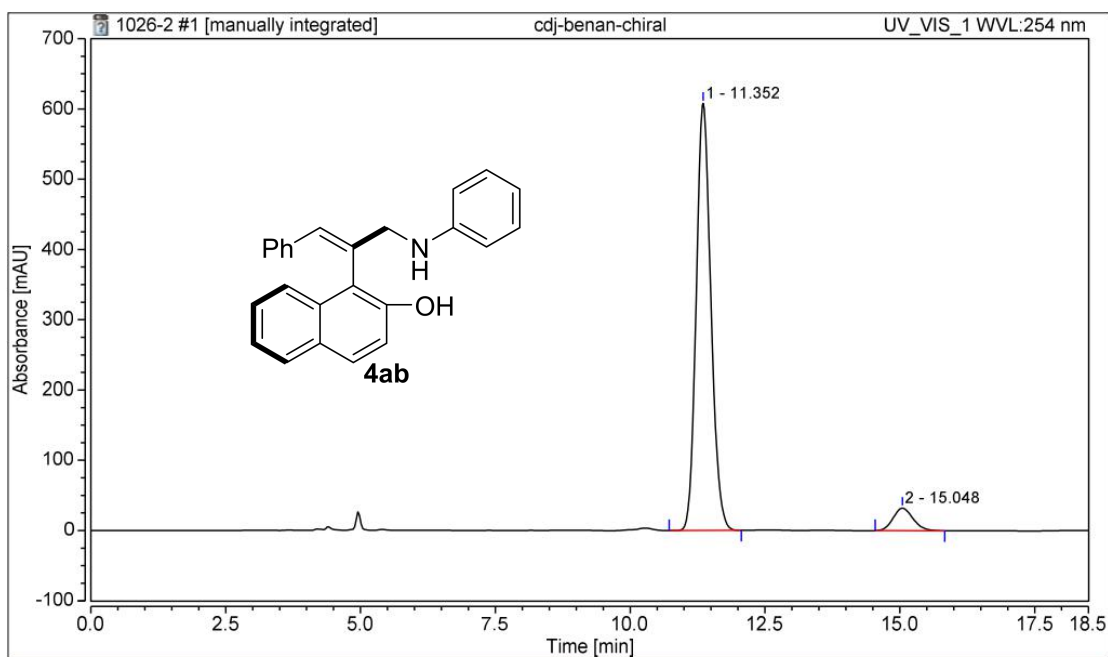

| Integration Results |                       |                 |                |                    |                |                   |
|---------------------|-----------------------|-----------------|----------------|--------------------|----------------|-------------------|
| No.                 | Retention Time<br>min | Area<br>mAU*min | Height<br>mAU  | Relative Area<br>% | Asymmetry (EP) | Peak Width<br>min |
| 1                   | 11.352                | 191.873         | 607.848        | 93.31              | 1.15           | 0.50              |
| 2                   | 15.048                | 13.754          | 32.033         | 6.69               | 1.13           | 0.68              |
| <b>Total:</b>       |                       | <b>205.628</b>  | <b>639.881</b> | <b>100.00</b>      |                |                   |

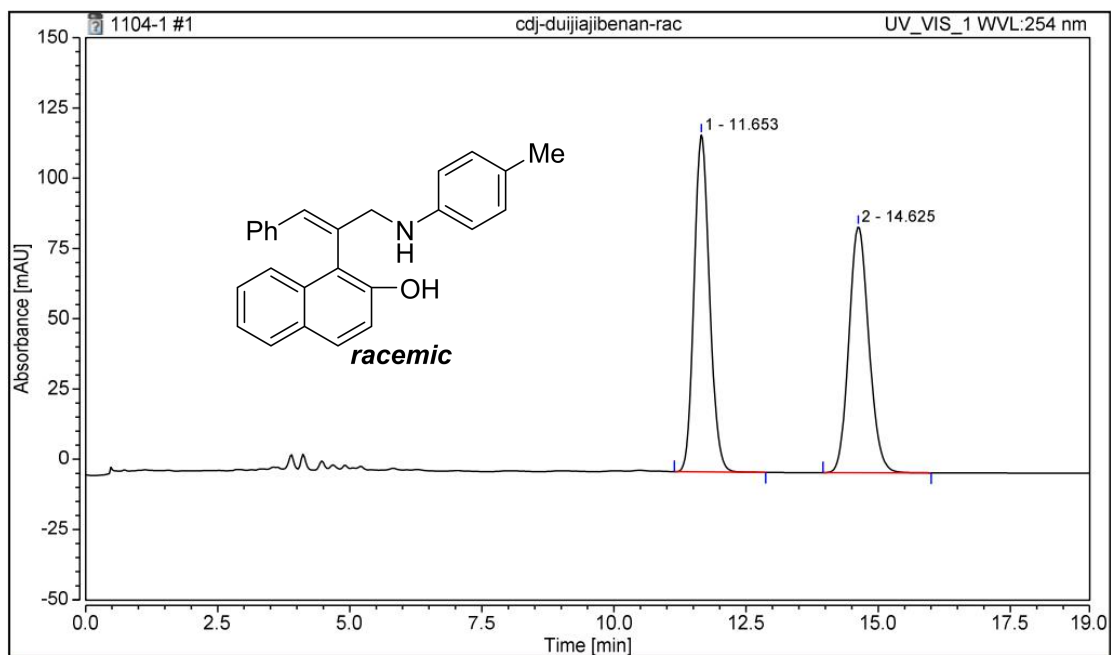

| Integration Results |                       |                 |                |                    |                |                   |
|---------------------|-----------------------|-----------------|----------------|--------------------|----------------|-------------------|
| No.                 | Retention Time<br>min | Area<br>mAU*min | Height<br>mAU  | Relative Area<br>% | Asymmetry (EP) | Peak Width<br>min |
| 1                   | 11.653                | 40.750          | 119.857        | 51.53              | 1.14           | 0.54              |
| 2                   | 14.625                | 38.325          | 87.563         | 48.47              | 1.12           | 0.69              |
| <b>Total:</b>       |                       | <b>79.075</b>   | <b>207.420</b> | <b>100.00</b>      |                |                   |

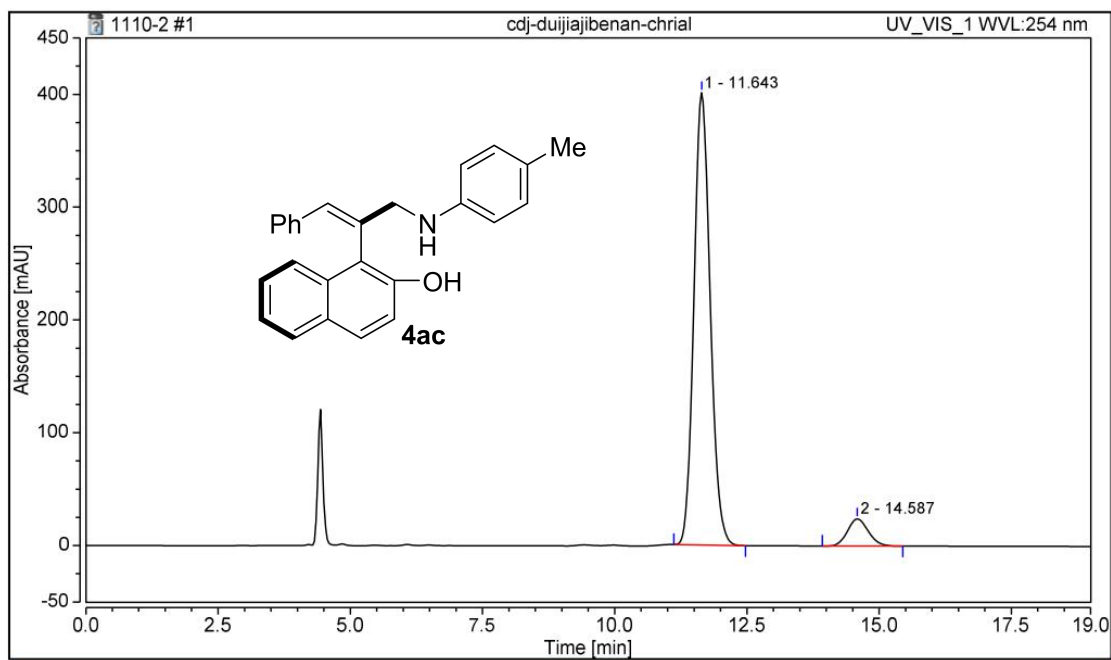

| Integration Results |                       |                 |                |                    |                |                   |
|---------------------|-----------------------|-----------------|----------------|--------------------|----------------|-------------------|
| No.                 | Retention Time<br>min | Area<br>mAU*min | Height<br>mAU  | Relative Area<br>% | Asymmetry (EP) | Peak Width<br>min |
| 1                   | 11.643                | 142.864         | 400.940        | 92.82              | 1.13           | 0.56              |
| 2                   | 14.587                | 11.046          | 24.149         | 7.18               | 1.12           | 0.73              |
| <b>Total:</b>       |                       | <b>153.910</b>  | <b>425.088</b> | <b>100.00</b>      |                |                   |

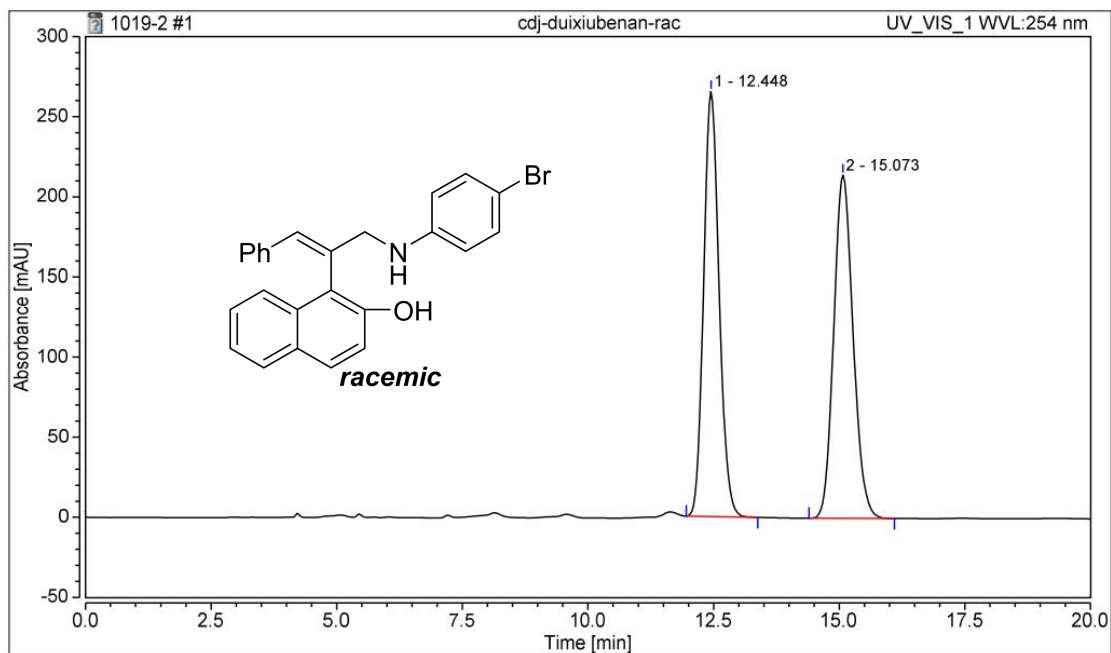

| Integration Results |                       |                 |                |                    |                |                   |
|---------------------|-----------------------|-----------------|----------------|--------------------|----------------|-------------------|
| No.                 | Retention Time<br>min | Area<br>mAU*min | Height<br>mAU  | Relative Area<br>% | Asymmetry (EP) | Peak Width<br>min |
| 1                   | 12.448                | 94.604          | 265.238        | 49.75              | 1.13           | 0.56              |
| 2                   | 15.073                | 95.569          | 214.142        | 50.25              | 1.13           | 0.71              |
| <b>Total:</b>       |                       | <b>190.174</b>  | <b>479.380</b> | <b>100.00</b>      |                |                   |

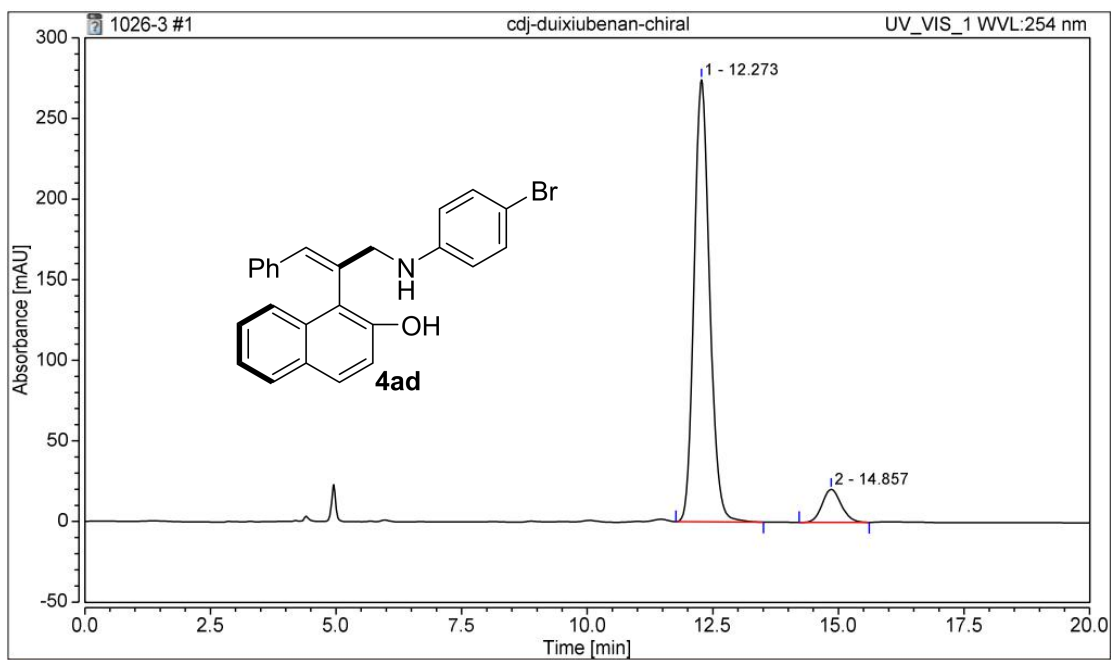

| Integration Results |                       |                 |                |                    |                |                   |
|---------------------|-----------------------|-----------------|----------------|--------------------|----------------|-------------------|
| No.                 | Retention Time<br>min | Area<br>mAU*min | Height<br>mAU  | Relative Area<br>% | Asymmetry (EP) | Peak Width<br>min |
| 1                   | 12.273                | 98.334          | 274.167        | 91.62              | 1.15           | 0.56              |
| 2                   | 14.857                | 8.992           | 20.459         | 8.38               | 1.12           | 0.70              |
| <b>Total:</b>       |                       | <b>107.326</b>  | <b>294.626</b> | <b>100.00</b>      |                |                   |

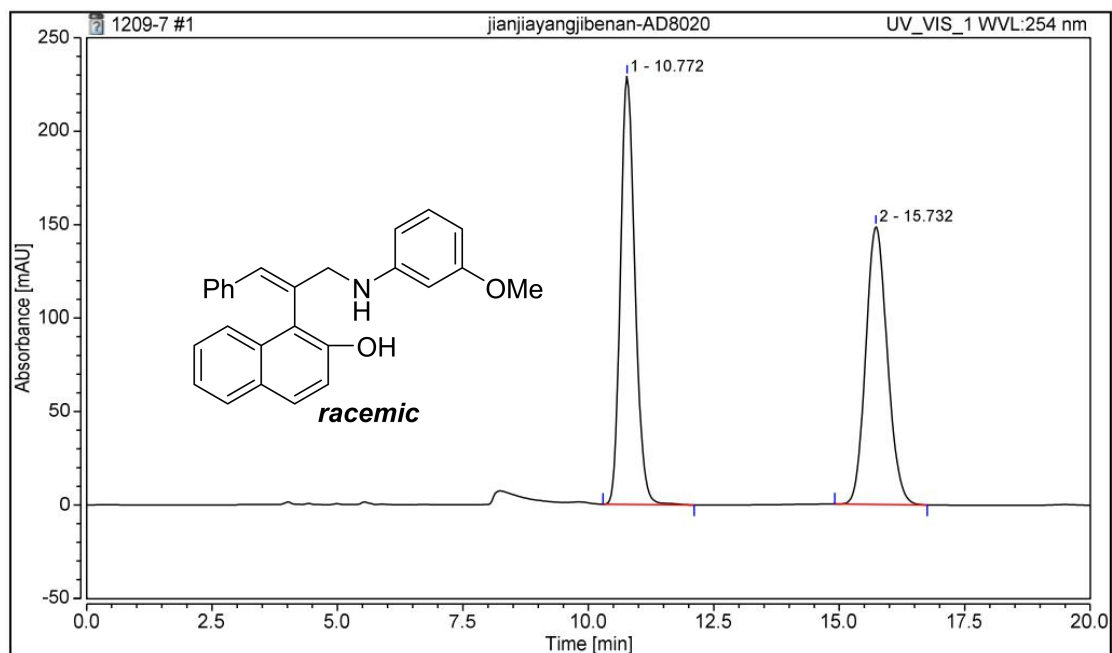

| Integration Results |                       |                 |                |                    |                |                   |
|---------------------|-----------------------|-----------------|----------------|--------------------|----------------|-------------------|
| No.                 | Retention Time<br>min | Area<br>mAU*min | Height<br>mAU  | Relative Area<br>% | Asymmetry (EP) | Peak Width<br>min |
| 1                   | 10.772                | 76.826          | 229.152        | 50.88              | 1.19           | 0.52              |
| 2                   | 15.732                | 74.160          | 148.790        | 49.12              | 1.12           | 0.78              |
| <b>Total:</b>       |                       | <b>150.986</b>  | <b>377.941</b> | <b>100.00</b>      |                |                   |

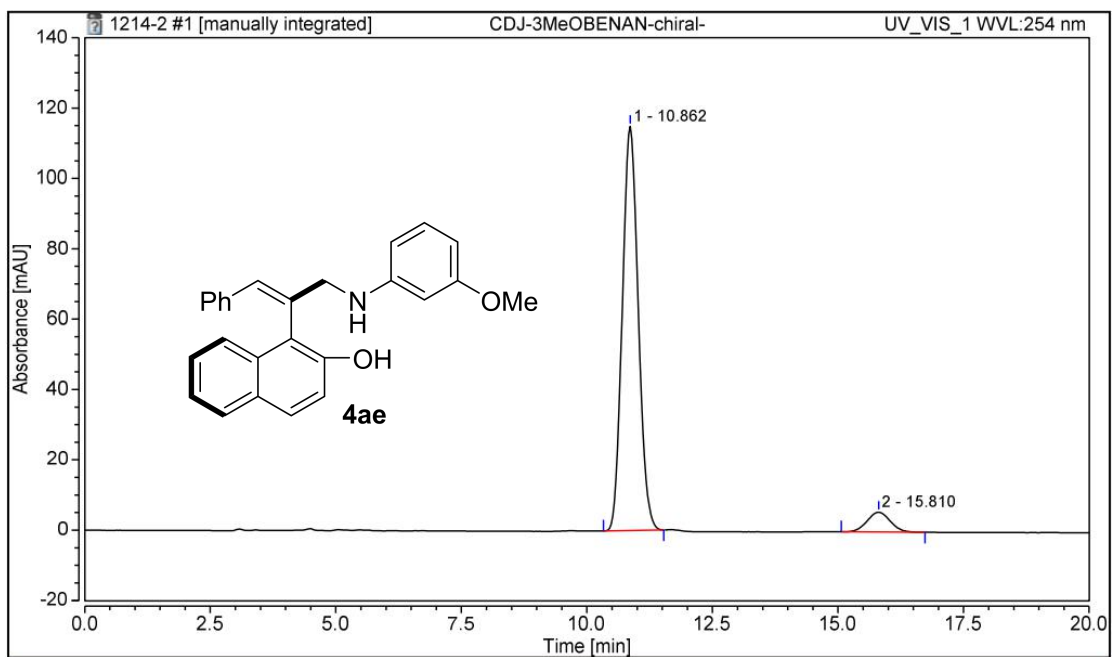

| Integration Results |                       |                 |                |                    |                |                   |
|---------------------|-----------------------|-----------------|----------------|--------------------|----------------|-------------------|
| No.                 | Retention Time<br>min | Area<br>mAU*min | Height<br>mAU  | Relative Area<br>% | Asymmetry (EP) | Peak Width<br>min |
| 1                   | 10.862                | 42.080          | 114.920        | 93.35              | 1.09           | 0.58              |
| 2                   | 15.810                | 2.997           | 5.604          | 6.65               | 1.04           | 0.84              |
| <b>Total:</b>       |                       | <b>45.077</b>   | <b>120.524</b> | <b>100.00</b>      |                |                   |

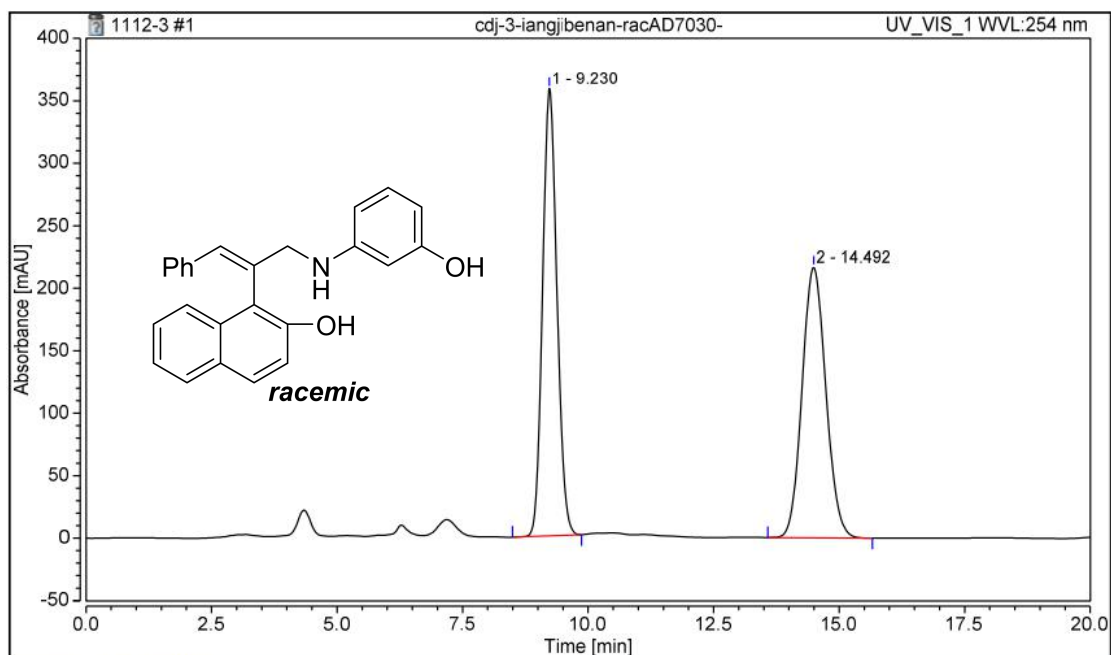

| Integration Results |                    |                |                |                 |                |                |
|---------------------|--------------------|----------------|----------------|-----------------|----------------|----------------|
| No.                 | Retention Time min | Area mAU*min   | Height mAU     | Relative Area % | Asymmetry (EP) | Peak Width min |
| 1                   | 9.230              | 118.624        | 357.916        | 49.96           | 1.11           | 0.52           |
| 2                   | 14.492             | 118.833        | 216.602        | 50.04           | 1.09           | 0.86           |
| <b>Total:</b>       |                    | <b>237.458</b> | <b>574.518</b> | <b>100.00</b>   |                |                |

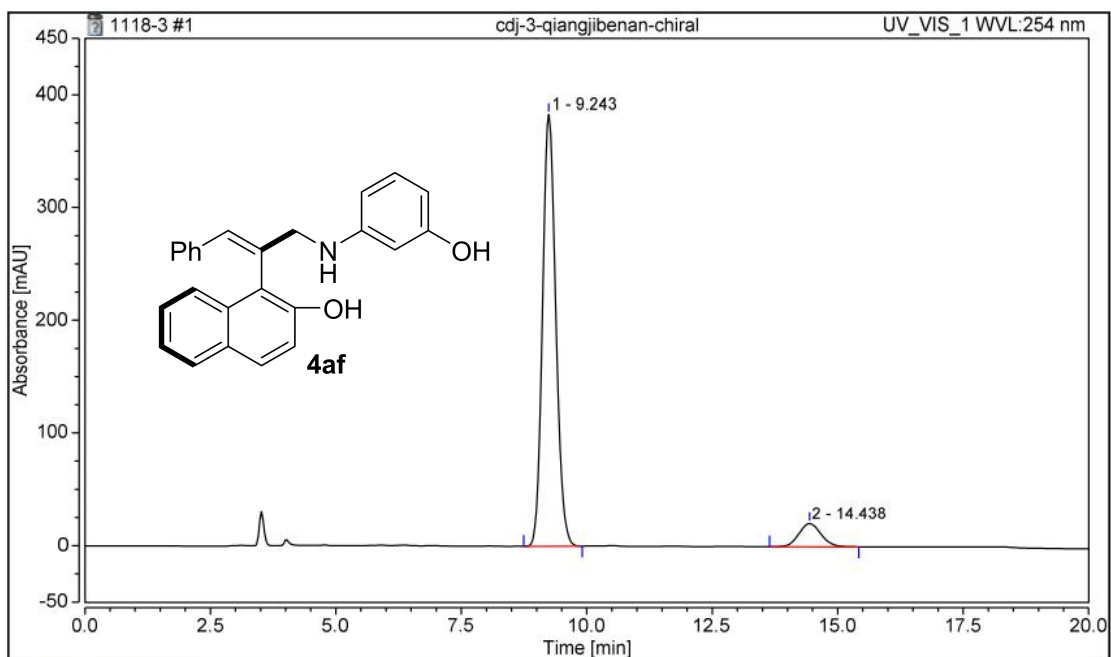

| Integration Results |                    |                |                |                 |                |                |
|---------------------|--------------------|----------------|----------------|-----------------|----------------|----------------|
| No.                 | Retention Time min | Area mAU*min   | Height mAU     | Relative Area % | Asymmetry (EP) | Peak Width min |
| 1                   | 9.243              | 117.148        | 383.108        | 91.75           | 1.13           | 0.48           |
| 2                   | 14.438             | 10.540         | 20.574         | 8.25            | 1.09           | 0.81           |
| <b>Total:</b>       |                    | <b>127.688</b> | <b>403.682</b> | <b>100.00</b>   |                |                |



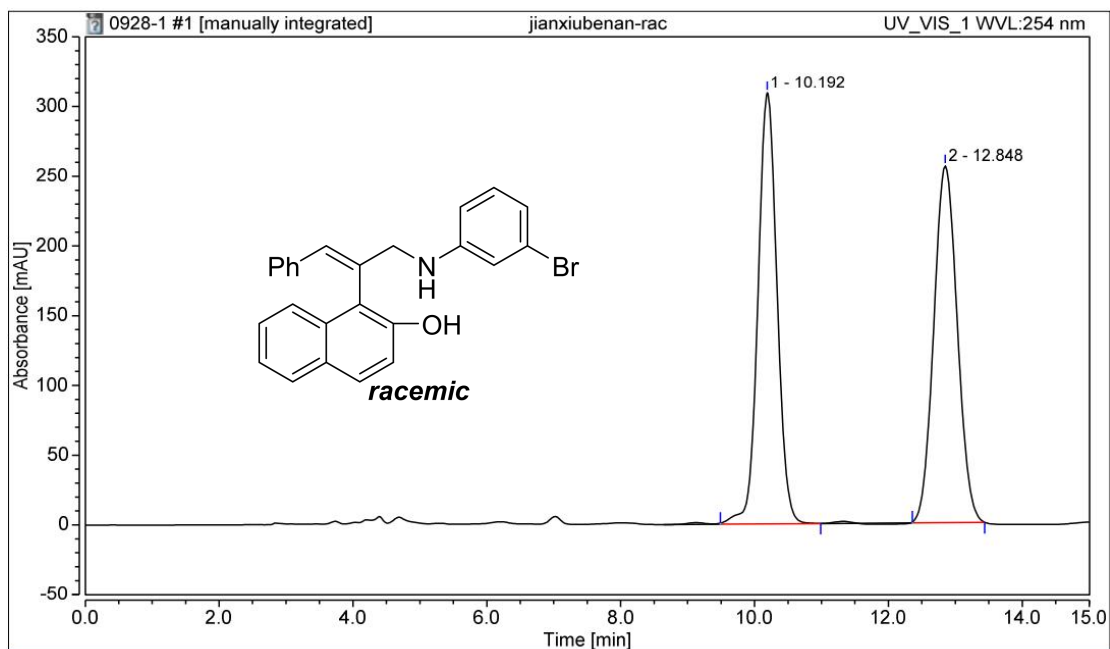

| Integration Results |                       |                 |                |                    |                |                   |
|---------------------|-----------------------|-----------------|----------------|--------------------|----------------|-------------------|
| No.                 | Retention Time<br>min | Area<br>mAU*min | Height<br>mAU  | Relative Area<br>% | Asymmetry (EP) | Peak Width<br>min |
| 1                   | 10.192                | 102.232         | 309.247        | 49.56              | 1.05           | 0.51              |
| 2                   | 12.848                | 104.057         | 255.897        | 50.44              | 1.07           | 0.65              |
| <b>Total:</b>       |                       | <b>206.289</b>  | <b>565.144</b> | <b>100.00</b>      |                |                   |

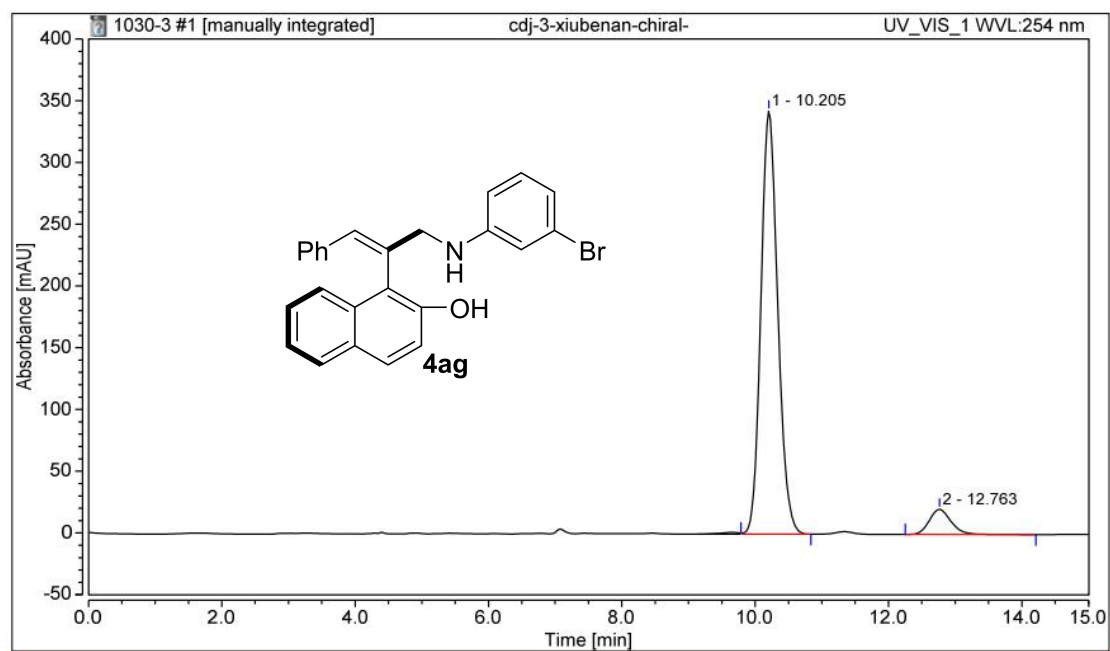

| Integration Results |                       |                 |                |                    |                |                   |
|---------------------|-----------------------|-----------------|----------------|--------------------|----------------|-------------------|
| No.                 | Retention Time<br>min | Area<br>mAU*min | Height<br>mAU  | Relative Area<br>% | Asymmetry (EP) | Peak Width<br>min |
| 1                   | 10.205                | 100.509         | 342.602        | 92.81              | 1.14           | 0.46              |
| 2                   | 12.763                | 7.785           | 20.252         | 7.19               | 1.18           | 0.59              |
| <b>Total:</b>       |                       | <b>108.294</b>  | <b>362.850</b> | <b>100.00</b>      |                |                   |

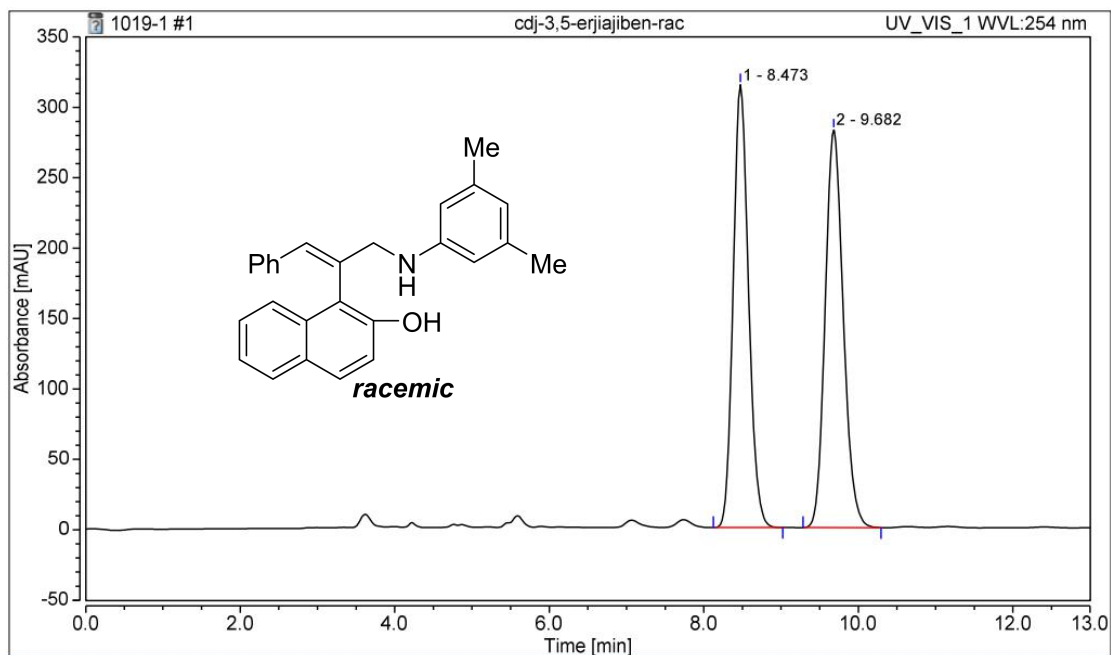

| Integration Results |                       |                 |                |                    |                |                   |
|---------------------|-----------------------|-----------------|----------------|--------------------|----------------|-------------------|
| No.                 | Retention Time<br>min | Area<br>mAU*min | Height<br>mAU  | Relative Area<br>% | Asymmetry (EP) | Peak Width<br>min |
| 1                   | 8.473                 | 72.334          | 314.296        | 48.52              | 1.15           | 0.37              |
| 2                   | 9.682                 | 76.742          | 282.307        | 51.48              | 1.15           | 0.43              |
| <b>Total:</b>       |                       | <b>149.076</b>  | <b>596.603</b> | <b>100.00</b>      |                |                   |

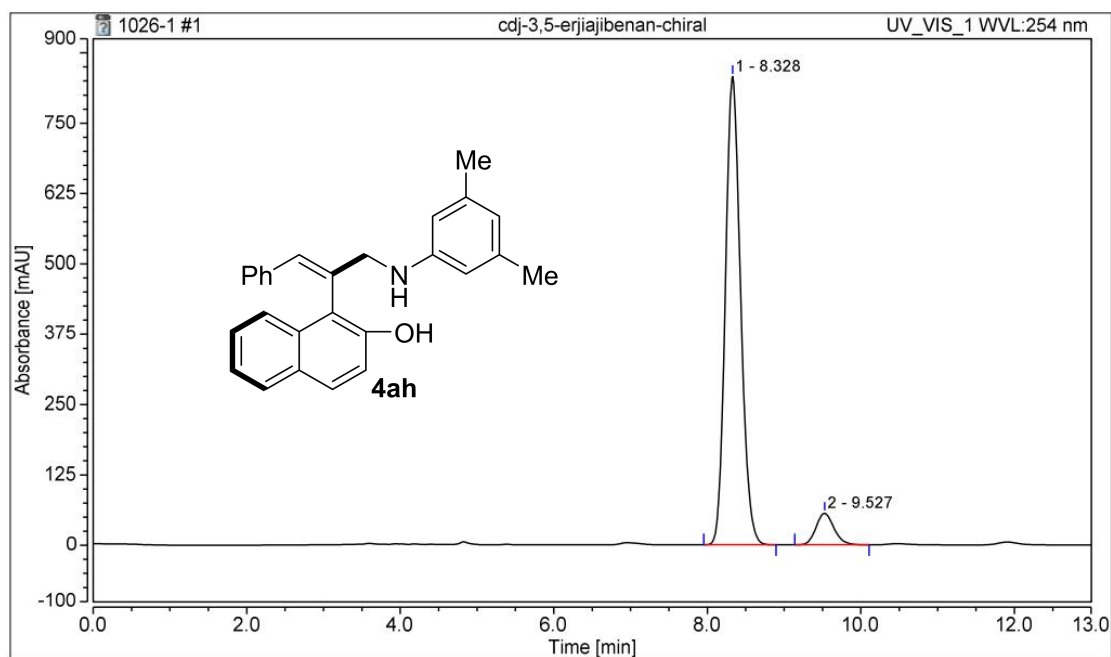

| Integration Results |                       |                 |                |                    |                |                   |
|---------------------|-----------------------|-----------------|----------------|--------------------|----------------|-------------------|
| No.                 | Retention Time<br>min | Area<br>mAU*min | Height<br>mAU  | Relative Area<br>% | Asymmetry (EP) | Peak Width<br>min |
| 1                   | 8.328                 | 191.028         | 832.041        | 92.64              | 1.15           | 0.36              |
| 2                   | 9.527                 | 15.176          | 56.028         | 7.36               | 1.14           | 0.43              |
| <b>Total:</b>       |                       | <b>206.203</b>  | <b>888.069</b> | <b>100.00</b>      |                |                   |



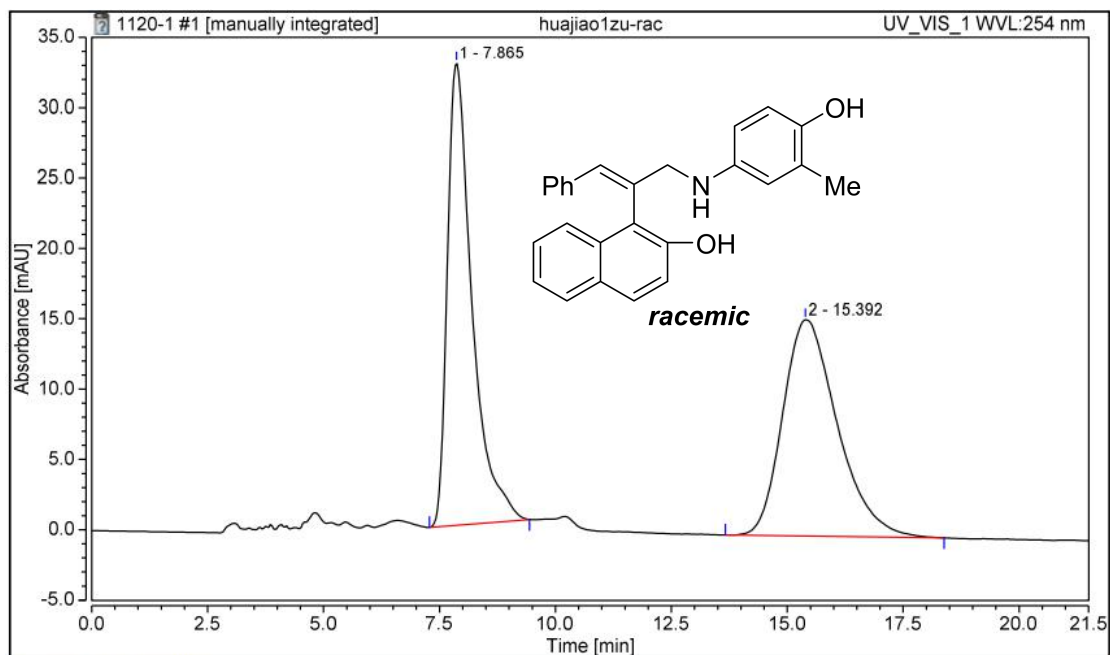

| Integration Results |                    |               |               |                 |                |                |
|---------------------|--------------------|---------------|---------------|-----------------|----------------|----------------|
| No.                 | Retention Time min | Area mAU*min  | Height mAU    | Relative Area % | Asymmetry (EP) | Peak Width min |
| 1                   | 7.865              | 20.244        | 32.877        | 49.10           | 1.88           | 0.90           |
| 2                   | 15.392             | 20.985        | 15.382        | 50.90           | 1.34           | 2.16           |
| <b>Total:</b>       |                    | <b>41.229</b> | <b>48.260</b> | <b>100.00</b>   |                |                |

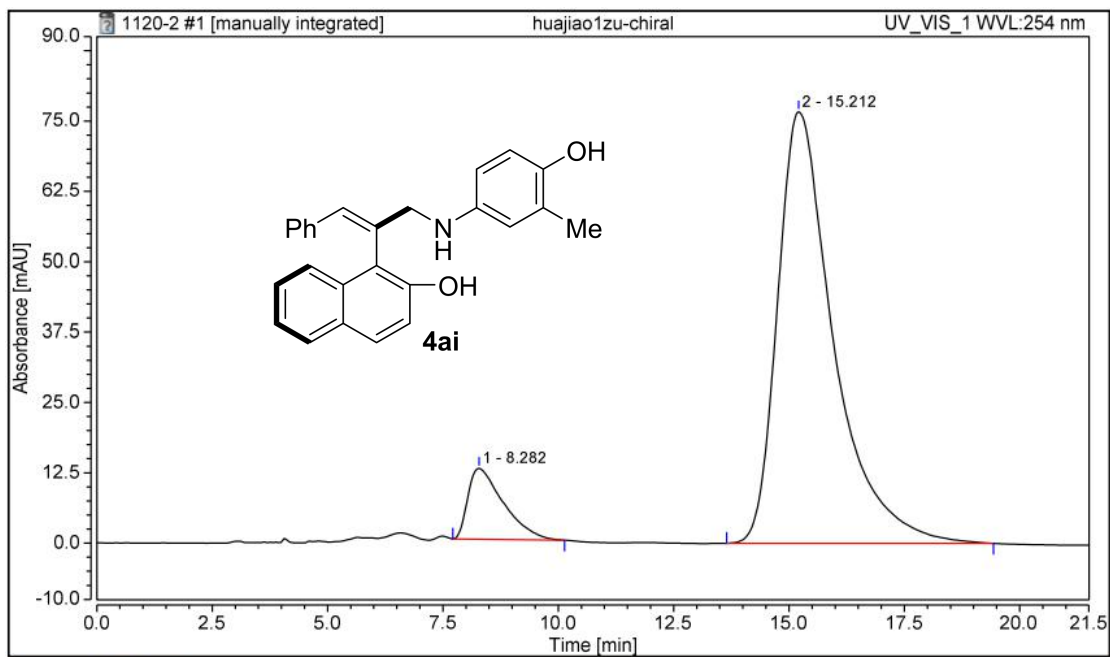

| Integration Results |                    |                |               |                 |                |                |
|---------------------|--------------------|----------------|---------------|-----------------|----------------|----------------|
| No.                 | Retention Time min | Area mAU*min   | Height mAU    | Relative Area % | Asymmetry (EP) | Peak Width min |
| 1                   | 8.282              | 11.245         | 12.604        | 9.46            | 1.99           | 1.39           |
| 2                   | 15.212             | 107.605        | 76.672        | 90.54           | 1.65           | 2.03           |
| <b>Total:</b>       |                    | <b>118.850</b> | <b>89.276</b> | <b>100.00</b>   |                |                |

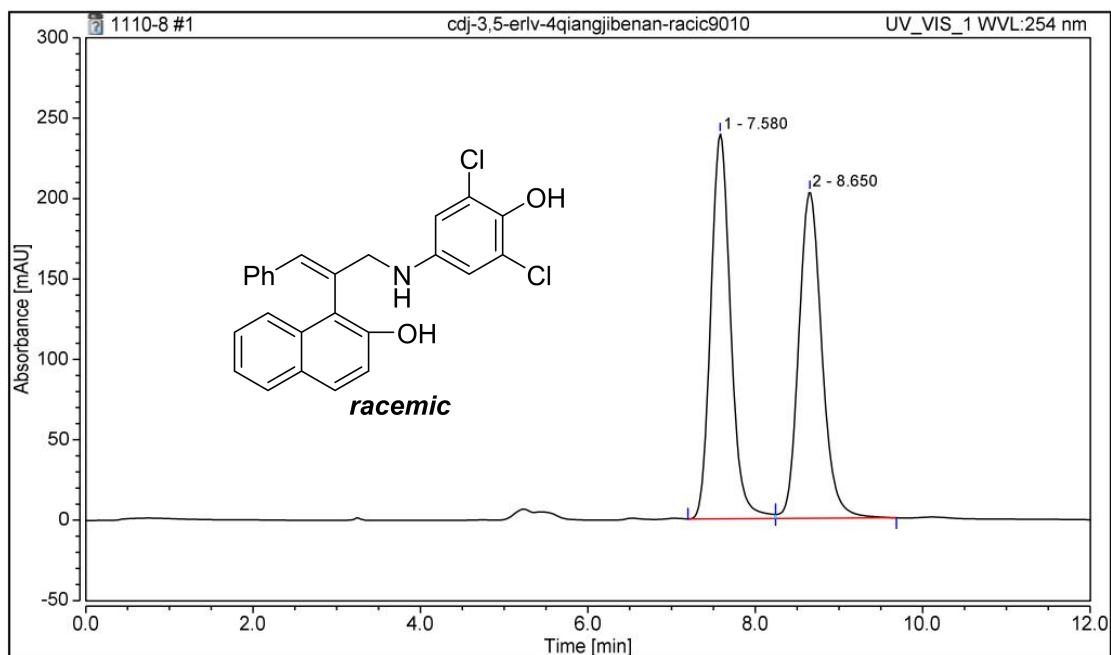

**Integration Results**

| No.           | Retention Time<br>min | Area<br>mAU*min | Height<br>mAU  | Relative Area<br>% | Asymmetry (EP) | Peak Width<br>min |
|---------------|-----------------------|-----------------|----------------|--------------------|----------------|-------------------|
| 1             | 7.580                 | 65.655          | 239.292        | 50.29              | 1.15           | 0.42              |
| 2             | 8.650                 | 64.889          | 203.171        | 49.71              | 1.16           | 0.50              |
| <b>Total:</b> |                       | <b>130.545</b>  | <b>442.464</b> | <b>100.00</b>      |                |                   |

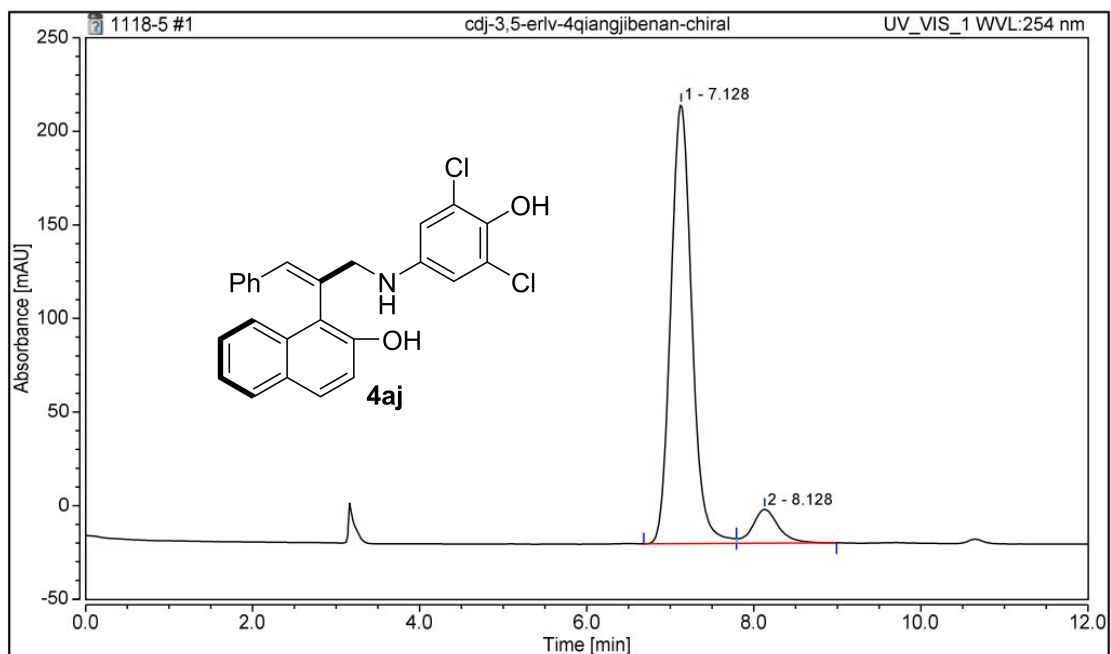

**Integration Results**

| No.           | Retention Time<br>min | Area<br>mAU*min | Height<br>mAU  | Relative Area<br>% | Asymmetry (EP) | Peak Width<br>min |
|---------------|-----------------------|-----------------|----------------|--------------------|----------------|-------------------|
| 1             | 7.128                 | 68.449          | 234.602        | 91.33              | 1.12           | 0.45              |
| 2             | 8.128                 | 6.498           | 18.082         | 8.67               | n.a.           | 0.53              |
| <b>Total:</b> |                       | <b>74.947</b>   | <b>252.683</b> | <b>100.00</b>      |                |                   |

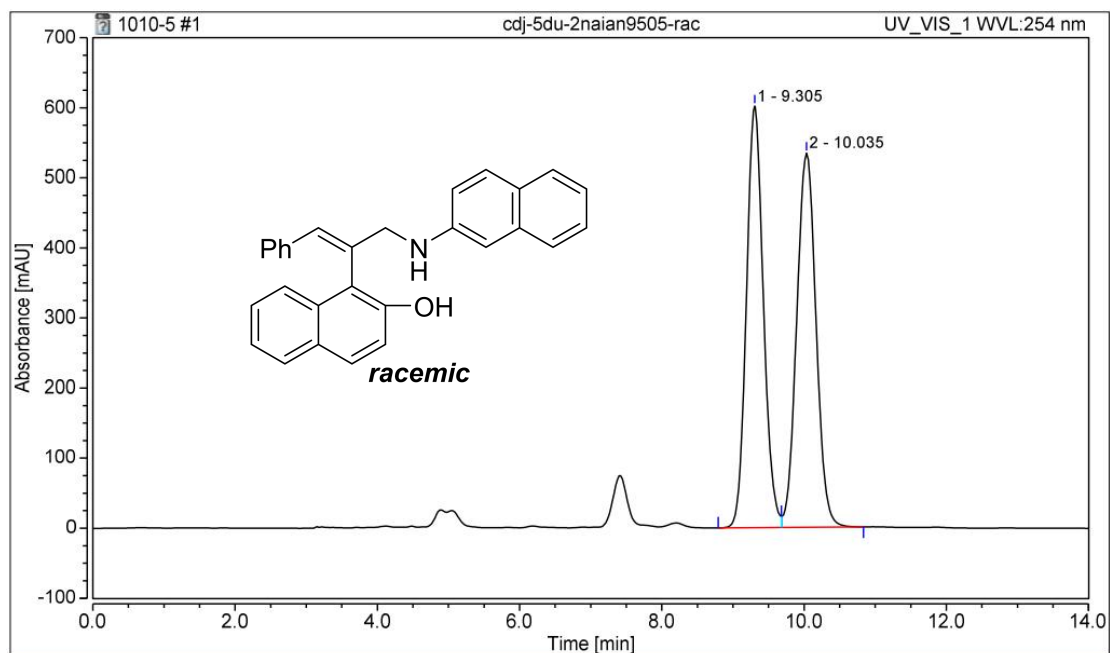

| Integration Results |                       |                 |                 |                    |                |                   |
|---------------------|-----------------------|-----------------|-----------------|--------------------|----------------|-------------------|
| No.                 | Retention Time<br>min | Area<br>mAU*min | Height<br>mAU   | Relative Area<br>% | Asymmetry (EP) | Peak Width<br>min |
| 1                   | 9.305                 | 166.424         | 601.775         | 49.79              | 1.11           | 0.44              |
| 2                   | 10.035                | 167.853         | 533.779         | 50.21              | 1.03           | 0.50              |
| <b>Total:</b>       |                       | <b>334.277</b>  | <b>1135.555</b> | <b>100.00</b>      |                |                   |

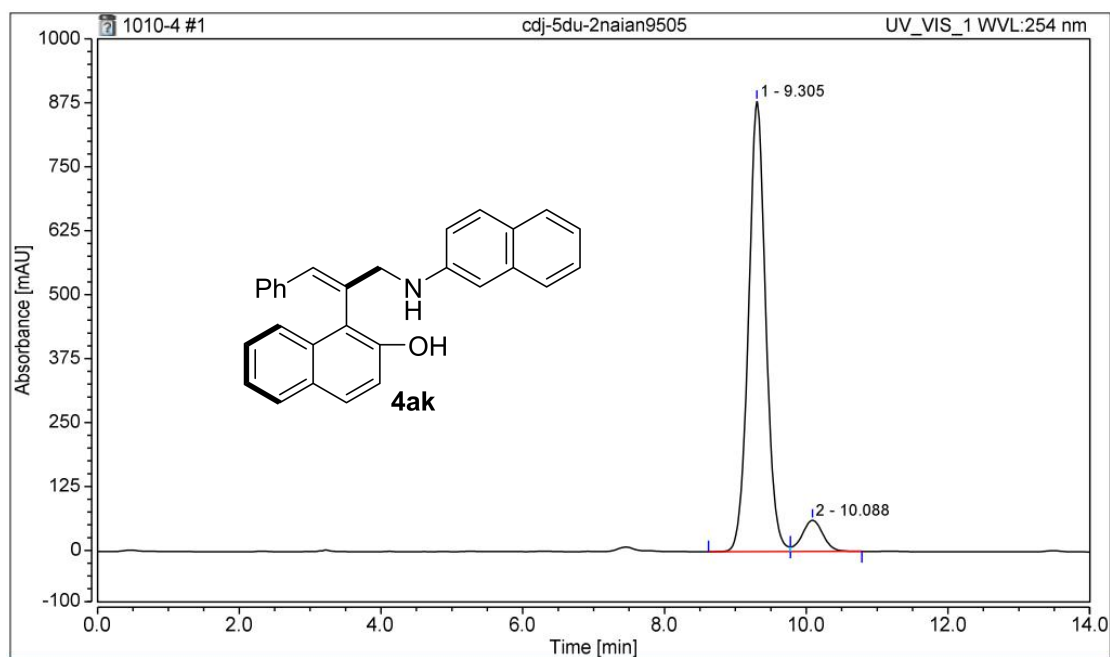

| Integration Results |                       |                 |                |                    |                |                   |
|---------------------|-----------------------|-----------------|----------------|--------------------|----------------|-------------------|
| No.                 | Retention Time<br>min | Area<br>mAU*min | Height<br>mAU  | Relative Area<br>% | Asymmetry (EP) | Peak Width<br>min |
| 1                   | 9.305                 | 247.416         | 880.048        | 92.25              | 1.05           | 0.44              |
| 2                   | 10.088                | 20.784          | 61.156         | 7.75               | n.a.           | 0.53              |
| <b>Total:</b>       |                       | <b>268.200</b>  | <b>941.204</b> | <b>100.00</b>      |                |                   |

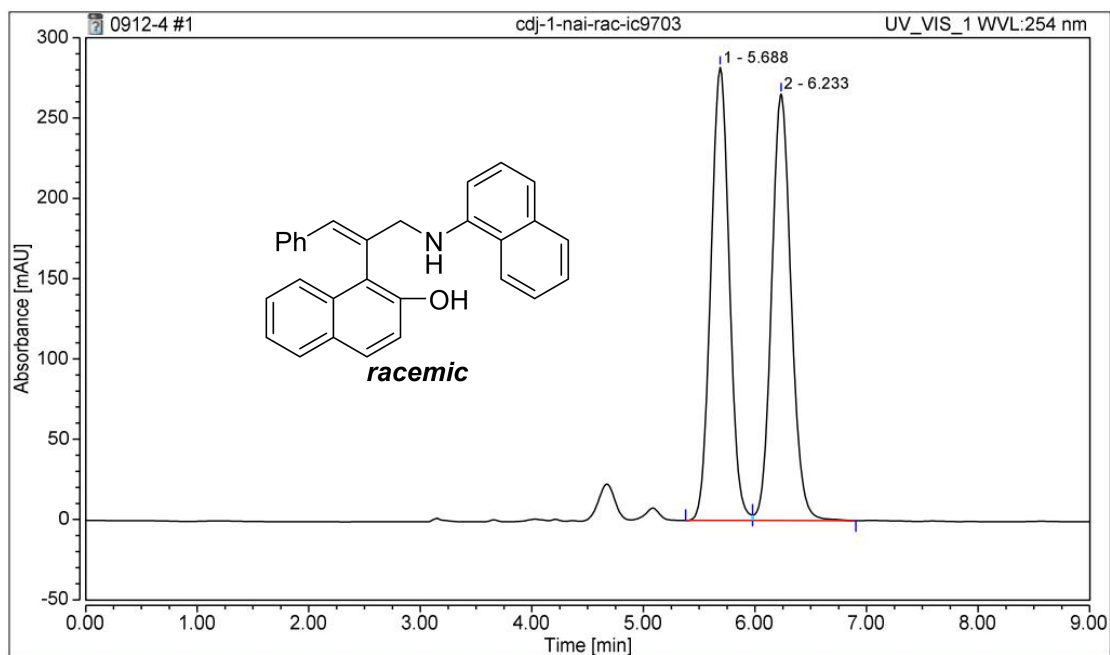

| Integration Results |                       |                 |                |                    |                |                   |
|---------------------|-----------------------|-----------------|----------------|--------------------|----------------|-------------------|
| No.                 | Retention Time<br>min | Area<br>mAU*min | Height<br>mAU  | Relative Area<br>% | Asymmetry (EP) | Peak Width<br>min |
| 1                   | 5.688                 | 54.045          | 282.232        | 50.09              | 1.03           | 0.30              |
| 2                   | 6.233                 | 53.852          | 265.538        | 49.91              | 1.10           | 0.32              |
| <b>Total:</b>       |                       | <b>107.898</b>  | <b>547.770</b> | <b>100.00</b>      |                |                   |

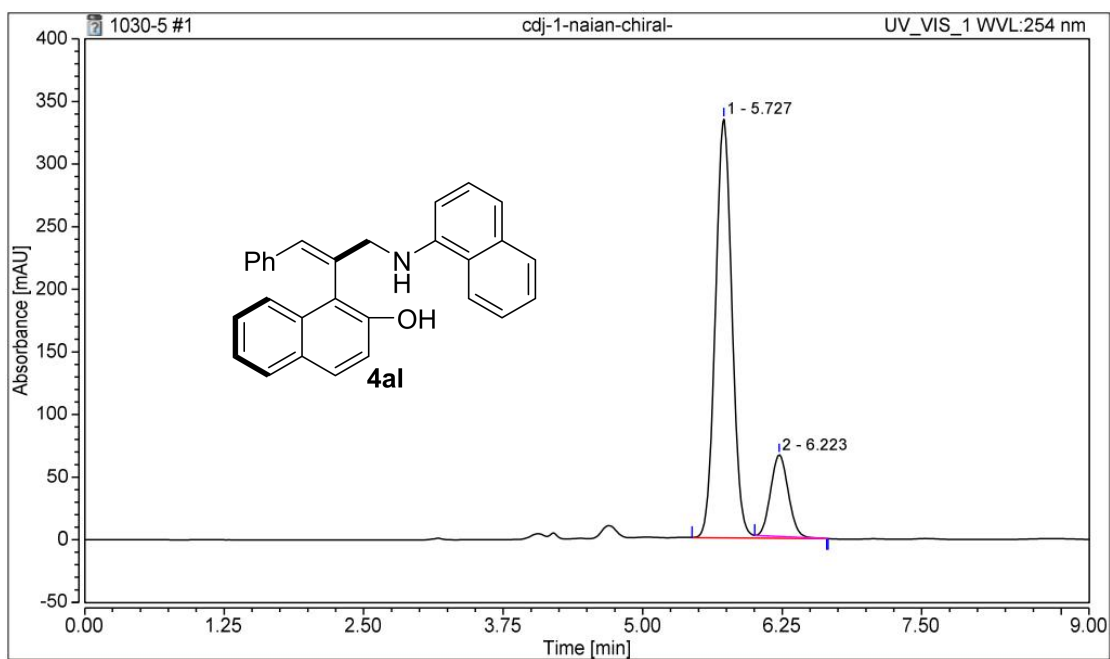

| Integration Results |                       |                 |                |                    |                |                   |
|---------------------|-----------------------|-----------------|----------------|--------------------|----------------|-------------------|
| No.                 | Retention Time<br>min | Area<br>mAU*min | Height<br>mAU  | Relative Area<br>% | Asymmetry (EP) | Peak Width<br>min |
| 1                   | 5.727                 | 58.030          | 334.301        | 83.03              | 1.03           | 0.27              |
| 2                   | 6.223                 | 11.864          | 65.146         | 16.97              | n.a.           | n.a.              |
| <b>Total:</b>       |                       | <b>69.894</b>   | <b>399.447</b> | <b>100.00</b>      |                |                   |

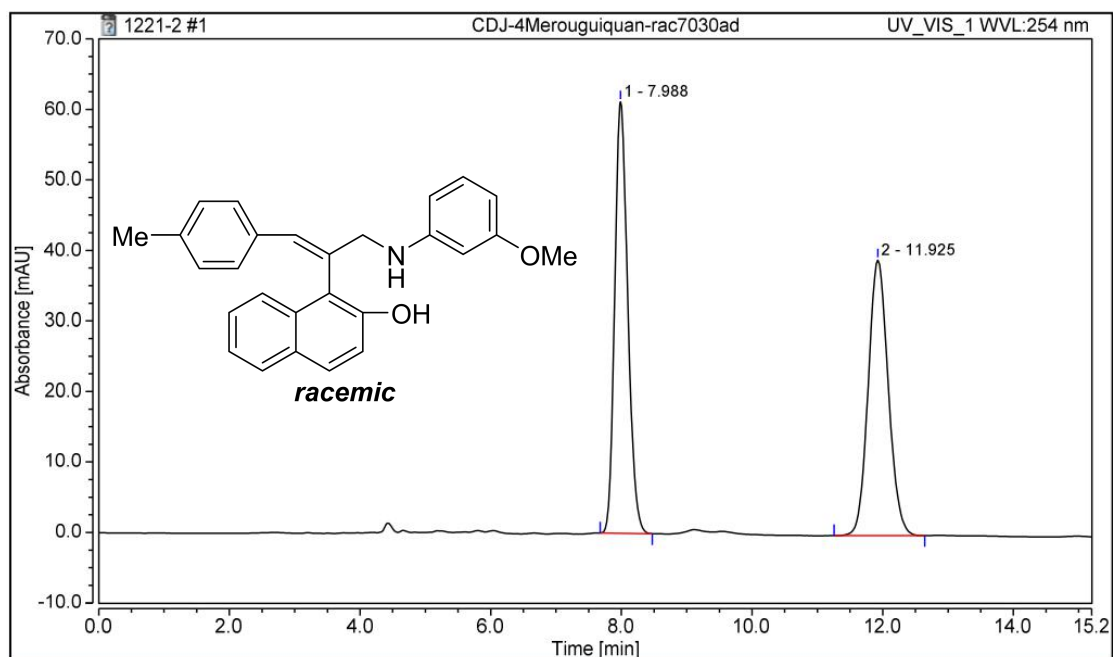

| Integration Results |                       |                 |                |                    |                |                   |
|---------------------|-----------------------|-----------------|----------------|--------------------|----------------|-------------------|
| No.                 | Retention Time<br>min | Area<br>mAU*min | Height<br>mAU  | Relative Area<br>% | Asymmetry (EP) | Peak Width<br>min |
| 1                   | 7.988                 | 14.134          | 61.171         | 50.36              | 1.20           | 0.37              |
| 2                   | 11.925                | 13.932          | 39.097         | 49.64              | 1.10           | 0.55              |
| <b>Total:</b>       |                       | <b>28.066</b>   | <b>100.268</b> | <b>100.00</b>      |                |                   |

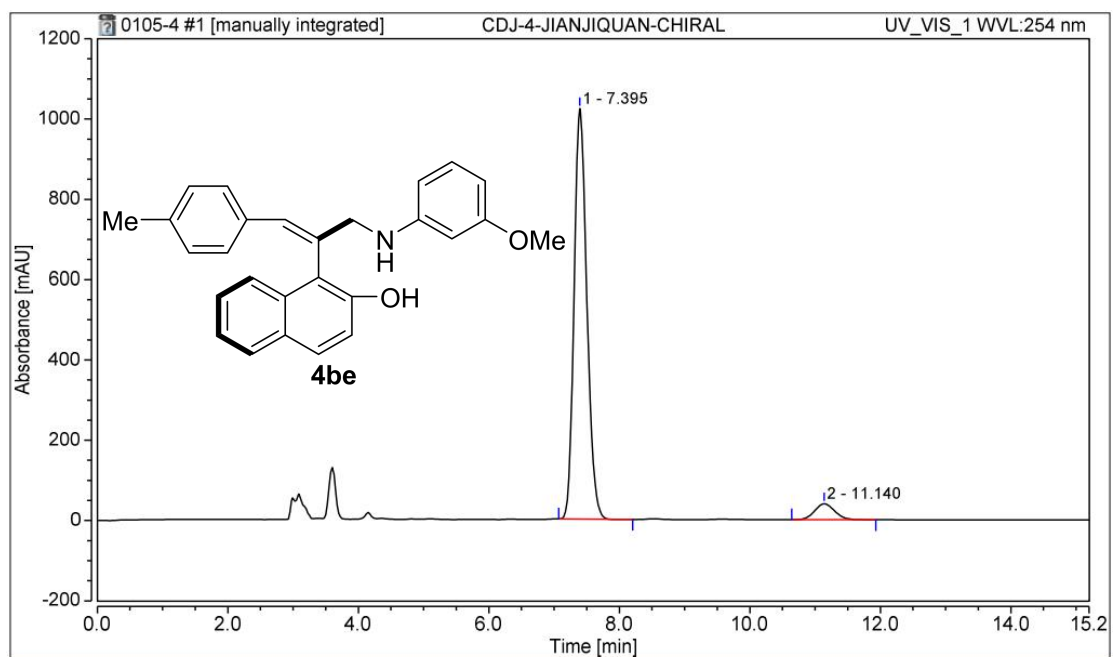

| Integration Results |                       |                 |                 |                    |                |                   |
|---------------------|-----------------------|-----------------|-----------------|--------------------|----------------|-------------------|
| No.                 | Retention Time<br>min | Area<br>mAU*min | Height<br>mAU   | Relative Area<br>% | Asymmetry (EP) | Peak Width<br>min |
| 1                   | 7.395                 | 230.742         | 1022.653        | 94.25              | 1.19           | 0.35              |
| 2                   | 11.140                | 14.079          | 39.495          | 5.75               | 1.08           | 0.57              |
| <b>Total:</b>       |                       | <b>244.821</b>  | <b>1062.148</b> | <b>100.00</b>      |                |                   |

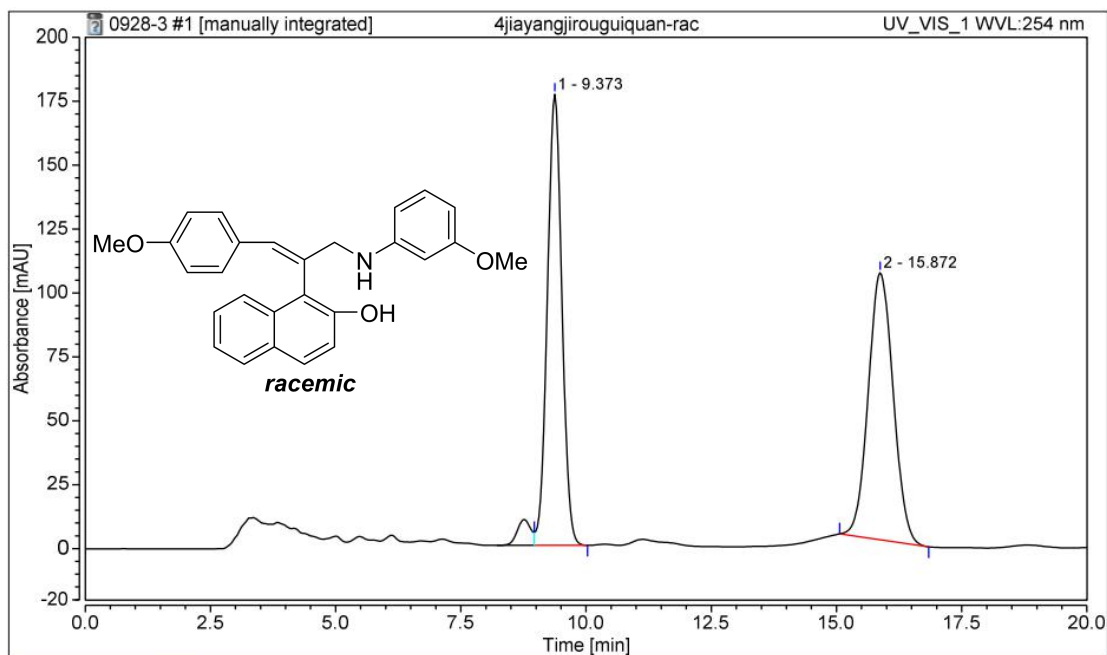

| Integration Results |                    |                |                |                 |                |                |
|---------------------|--------------------|----------------|----------------|-----------------|----------------|----------------|
| No.                 | Retention Time min | Area mAU*min   | Height mAU     | Relative Area % | Asymmetry (EP) | Peak Width min |
| 1                   | 9.373              | 59.578         | 176.453        | 49.71           | 1.02           | 0.54           |
| 2                   | 15.872             | 60.263         | 104.447        | 50.29           | 1.06           | 0.91           |
| <b>Total:</b>       |                    | <b>119.841</b> | <b>280.899</b> | <b>100.00</b>   |                |                |

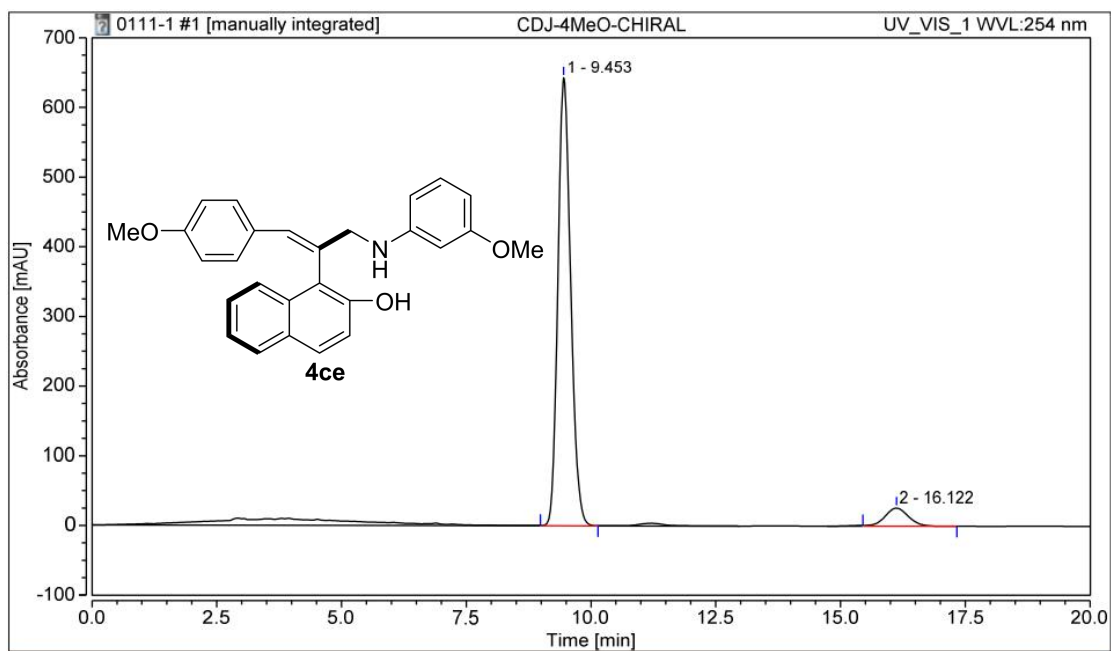

| Integration Results |                    |                |                |                 |                |                |
|---------------------|--------------------|----------------|----------------|-----------------|----------------|----------------|
| No.                 | Retention Time min | Area mAU*min   | Height mAU     | Relative Area % | Asymmetry (EP) | Peak Width min |
| 1                   | 9.453              | 190.942        | 643.038        | 93.07           | 1.18           | 0.47           |
| 2                   | 16.122             | 14.228         | 26.059         | 6.93            | 1.01           | 0.85           |
| <b>Total:</b>       |                    | <b>205.170</b> | <b>669.098</b> | <b>100.00</b>   |                |                |



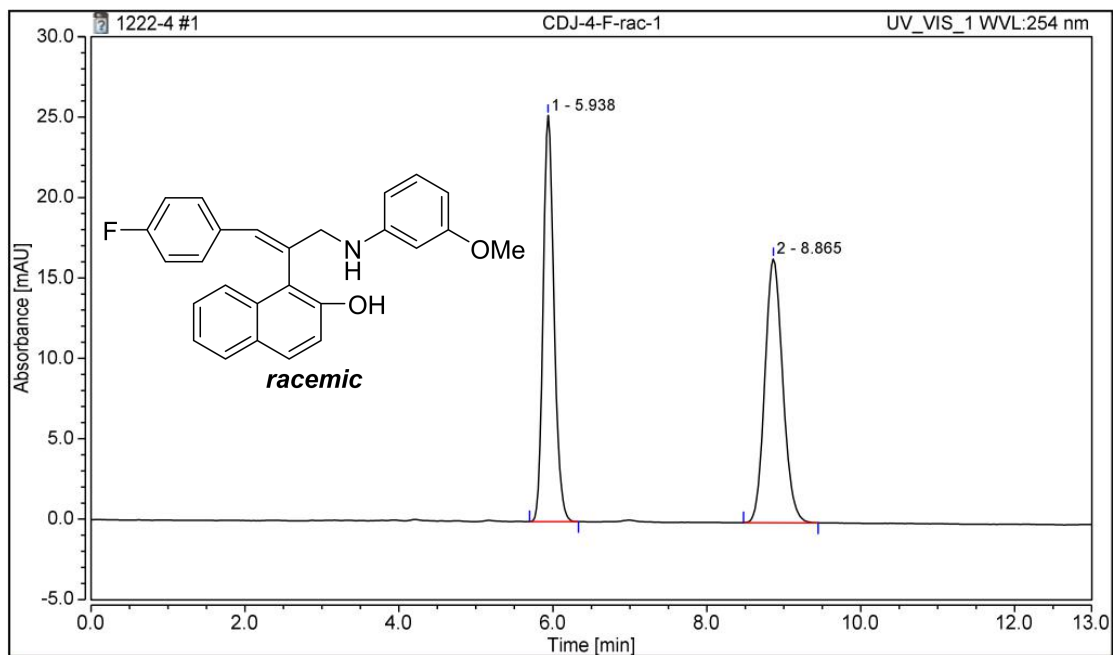

| Integration Results |                       |                 |               |                    |                |                   |
|---------------------|-----------------------|-----------------|---------------|--------------------|----------------|-------------------|
| No.                 | Retention Time<br>min | Area<br>mAU*min | Height<br>mAU | Relative Area<br>% | Asymmetry (EP) | Peak Width<br>min |
| 1                   | 5.938                 | 4.122           | 25.255        | 48.28              | 1.20           | 0.25              |
| 2                   | 8.865                 | 4.416           | 16.414        | 51.72              | 1.13           | 0.42              |
| <b>Total:</b>       |                       | <b>8.539</b>    | <b>41.668</b> | <b>100.00</b>      |                |                   |

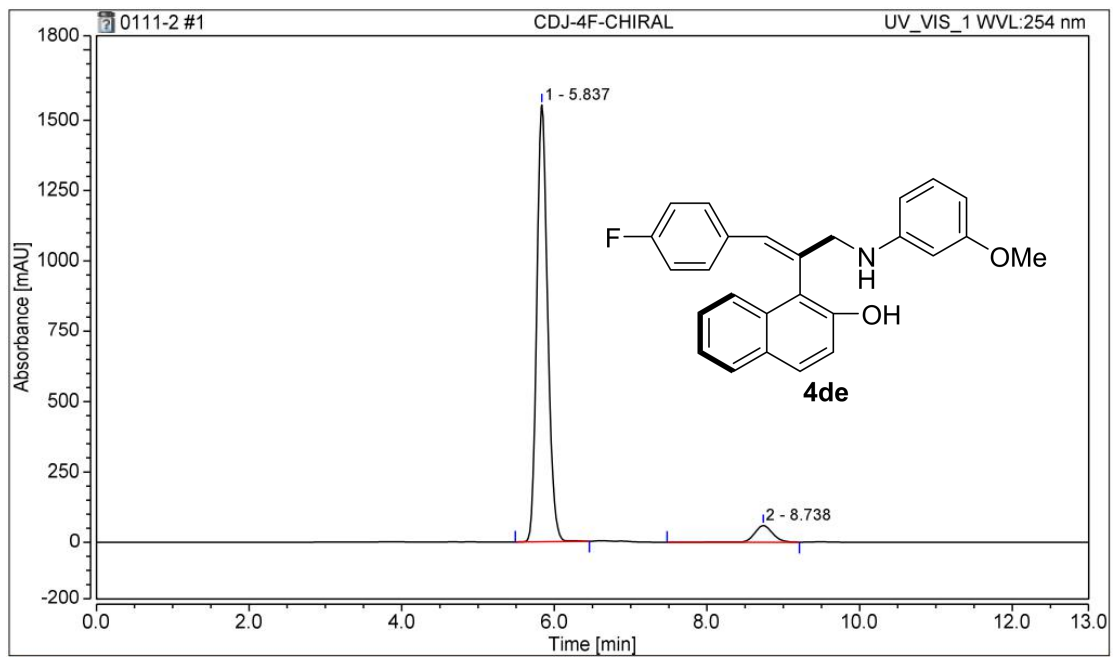

| Integration Results |                       |                 |                 |                    |                |                   |
|---------------------|-----------------------|-----------------|-----------------|--------------------|----------------|-------------------|
| No.                 | Retention Time<br>min | Area<br>mAU*min | Height<br>mAU   | Relative Area<br>% | Asymmetry (EP) | Peak Width<br>min |
| 1                   | 5.837                 | 253.772         | 1552.366        | 94.03              | 1.17           | 0.26              |
| 2                   | 8.738                 | 16.104          | 59.101          | 5.97               | 1.11           | 0.43              |
| <b>Total:</b>       |                       | <b>269.876</b>  | <b>1611.466</b> | <b>100.00</b>      |                |                   |

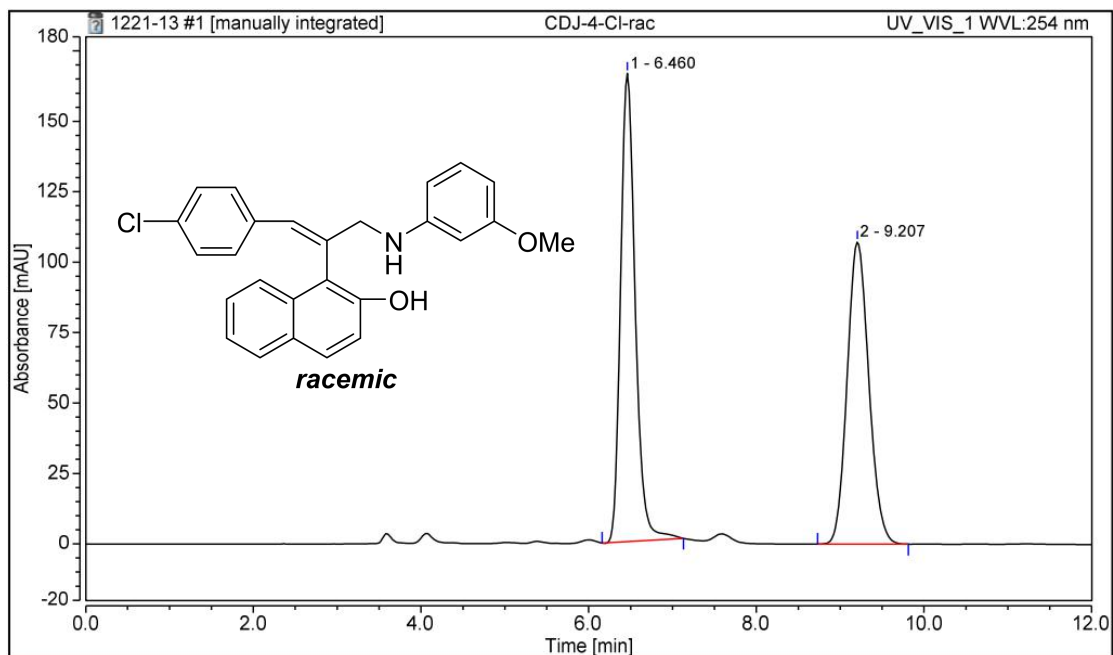

| Integration Results |                       |                 |                |                    |                |                   |
|---------------------|-----------------------|-----------------|----------------|--------------------|----------------|-------------------|
| No.                 | Retention Time<br>min | Area<br>mAU*min | Height<br>mAU  | Relative Area<br>% | Asymmetry (EP) | Peak Width<br>min |
| 1                   | 6.460                 | 33.514          | 166.291        | 51.05              | 1.22           | 0.31              |
| 2                   | 9.207                 | 32.132          | 107.305        | 48.95              | 1.12           | 0.47              |
| <b>Total:</b>       |                       | <b>65.647</b>   | <b>273.595</b> | <b>100.00</b>      |                |                   |

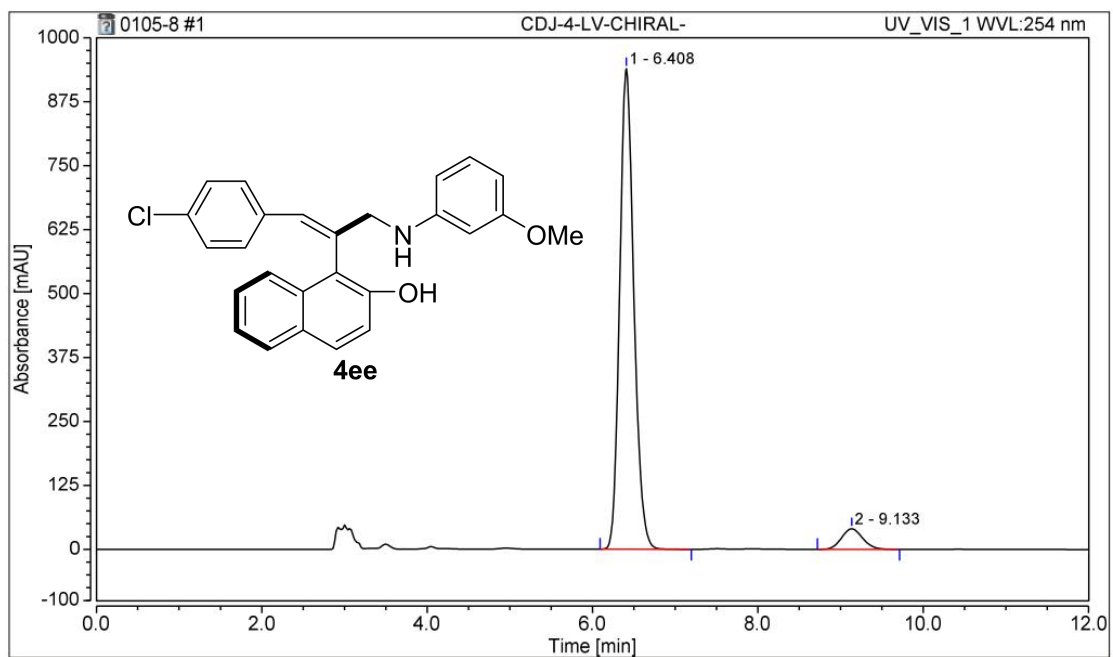

| Integration Results |                       |                 |                |                    |                |                   |
|---------------------|-----------------------|-----------------|----------------|--------------------|----------------|-------------------|
| No.                 | Retention Time<br>min | Area<br>mAU*min | Height<br>mAU  | Relative Area<br>% | Asymmetry (EP) | Peak Width<br>min |
| 1                   | 6.408                 | 186.210         | 939.157        | 93.98              | 1.18           | 0.31              |
| 2                   | 9.133                 | 11.922          | 40.182         | 6.02               | 1.11           | 0.47              |
| <b>Total:</b>       |                       | <b>198.133</b>  | <b>979.338</b> | <b>100.00</b>      |                |                   |



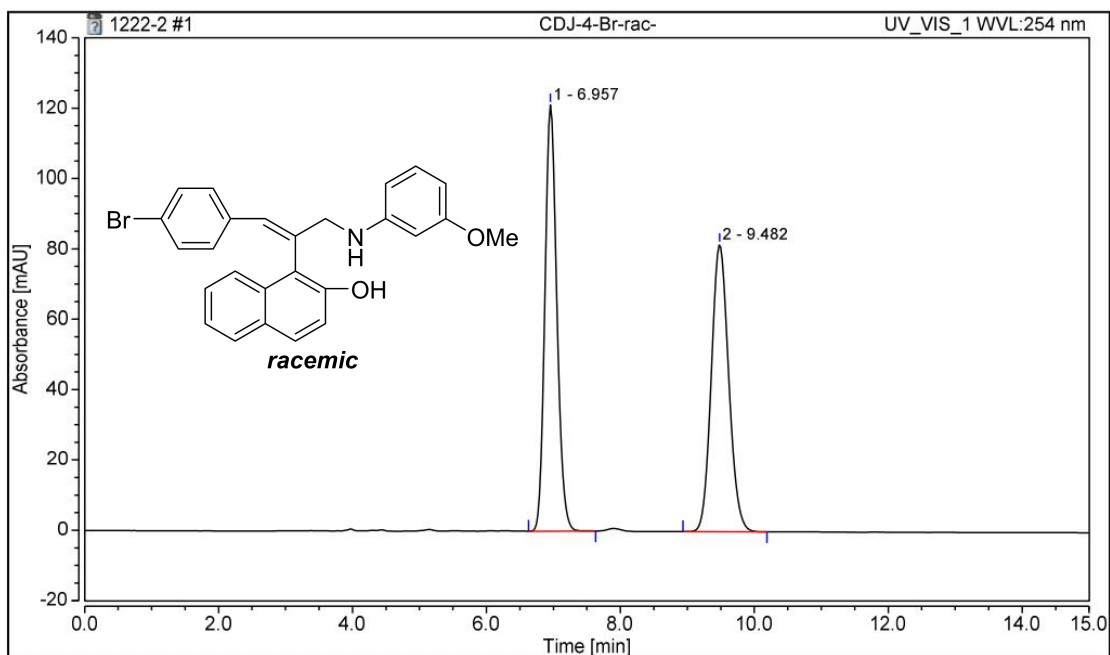

| Integration Results |                    |               |                |                 |                |                |
|---------------------|--------------------|---------------|----------------|-----------------|----------------|----------------|
| No.                 | Retention Time min | Area mAU*min  | Height mAU     | Relative Area % | Asymmetry (EP) | Peak Width min |
| 1                   | 6.957              | 25.052        | 121.203        | 50.48           | 1.15           | 0.32           |
| 2                   | 9.482              | 24.571        | 81.659         | 49.52           | 1.11           | 0.48           |
| <b>Total:</b>       |                    | <b>49.622</b> | <b>202.862</b> | <b>100.00</b>   |                |                |

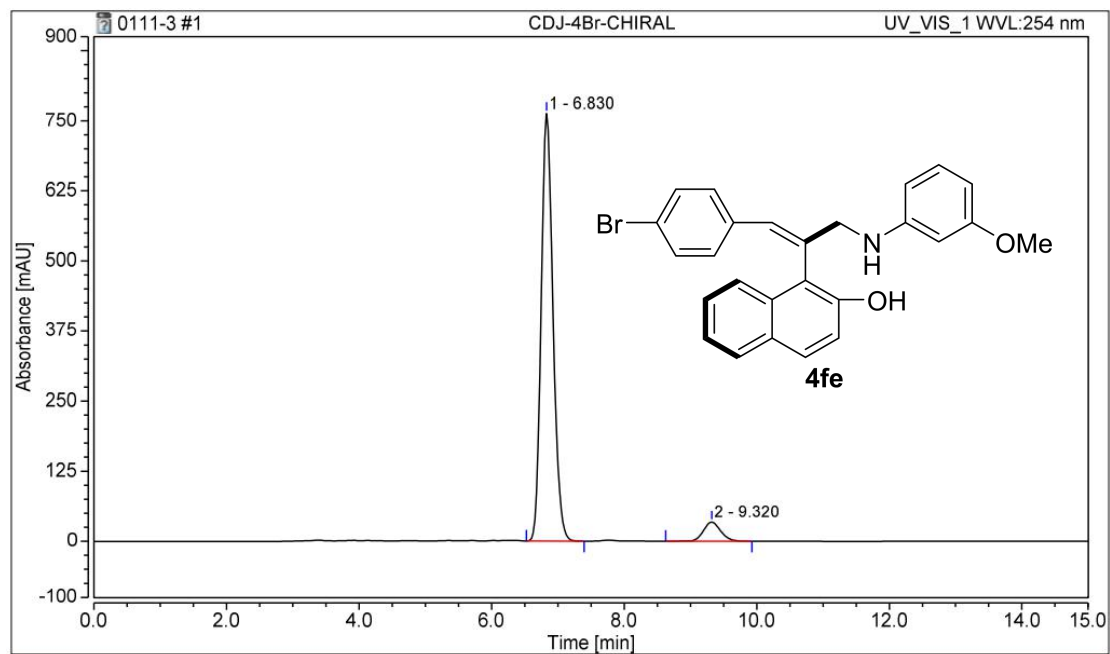

| Integration Results |                    |                |                |                 |                |                |
|---------------------|--------------------|----------------|----------------|-----------------|----------------|----------------|
| No.                 | Retention Time min | Area mAU*min   | Height mAU     | Relative Area % | Asymmetry (EP) | Peak Width min |
| 1                   | 6.830              | 157.287        | 762.622        | 93.78           | 1.17           | 0.33           |
| 2                   | 9.320              | 10.430         | 34.285         | 6.22            | 1.12           | 0.48           |
| <b>Total:</b>       |                    | <b>167.717</b> | <b>796.907</b> | <b>100.00</b>   |                |                |

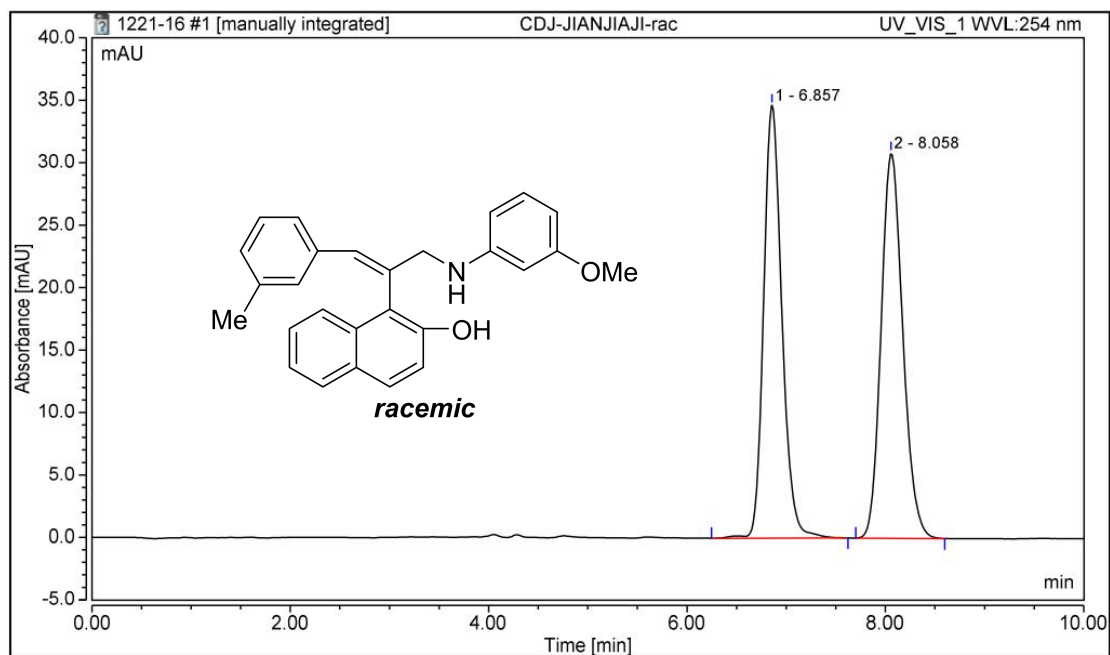

| Integration Results |                       |                 |               |                    |                |                   |
|---------------------|-----------------------|-----------------|---------------|--------------------|----------------|-------------------|
| No.                 | Retention Time<br>min | Area<br>mAU*min | Height<br>mAU | Relative Area<br>% | Asymmetry (EP) | Peak Width<br>min |
| 1                   | 6.857                 | 7.402           | 34.660        | 48.66              | 1.20           | 0.33              |
| 2                   | 8.058                 | 7.811           | 30.852        | 51.34              | 1.16           | 0.40              |
| <b>Total:</b>       |                       | <b>15.212</b>   | <b>65.512</b> | <b>100.00</b>      |                |                   |

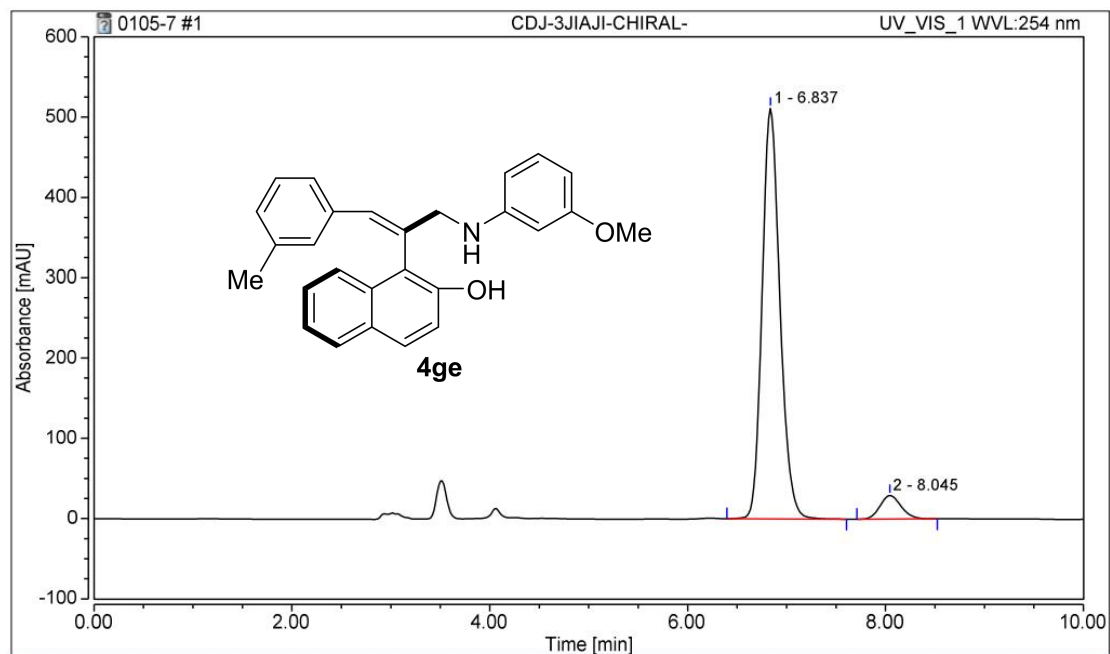

| Integration Results |                       |                 |                |                    |                |                   |
|---------------------|-----------------------|-----------------|----------------|--------------------|----------------|-------------------|
| No.                 | Retention Time<br>min | Area<br>mAU*min | Height<br>mAU  | Relative Area<br>% | Asymmetry (EP) | Peak Width<br>min |
| 1                   | 6.837                 | 106.869         | 511.195        | 93.62              | 1.18           | 0.33              |
| 2                   | 8.045                 | 7.285           | 29.336         | 6.38               | 1.14           | 0.39              |
| <b>Total:</b>       |                       | <b>114.154</b>  | <b>540.531</b> | <b>100.00</b>      |                |                   |

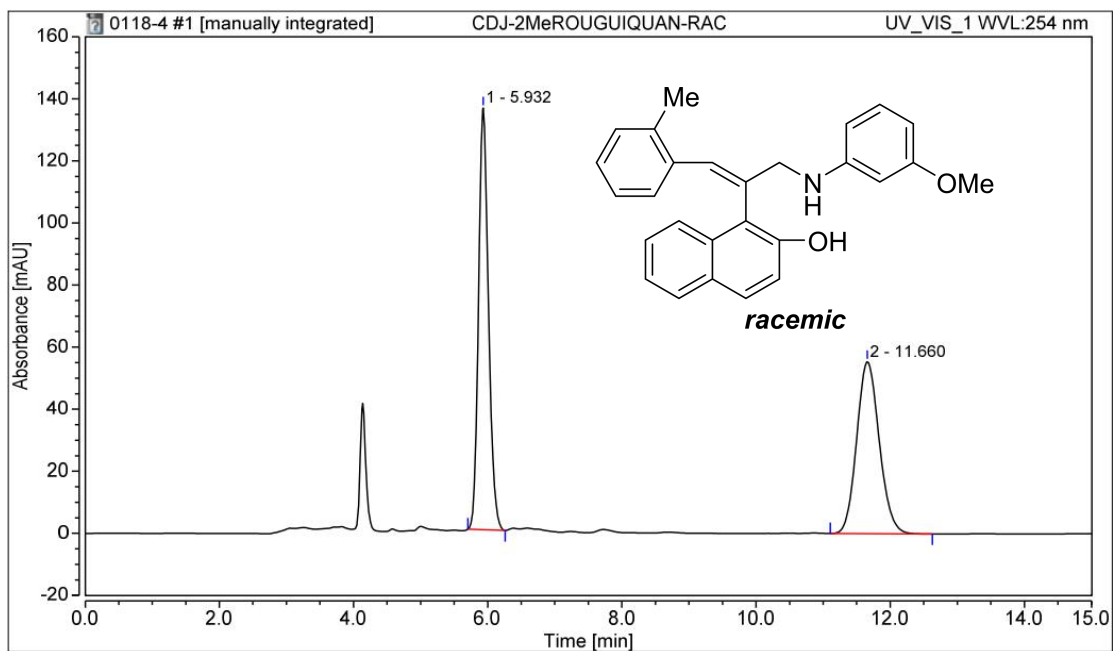

**Integration Results**

| No.           | Retention Time<br>min | Area<br>mAU*min | Height<br>mAU  | Relative Area<br>% | Asymmetry (EP) | Peak Width<br>min |
|---------------|-----------------------|-----------------|----------------|--------------------|----------------|-------------------|
| 1             | 5.932                 | 23.279          | 135.871        | 51.85              | 1.18           | 0.27              |
| 2             | 11.660                | 21.618          | 55.511         | 48.15              | 1.12           | 0.62              |
| <b>Total:</b> |                       | <b>44.897</b>   | <b>191.382</b> | <b>100.00</b>      |                |                   |

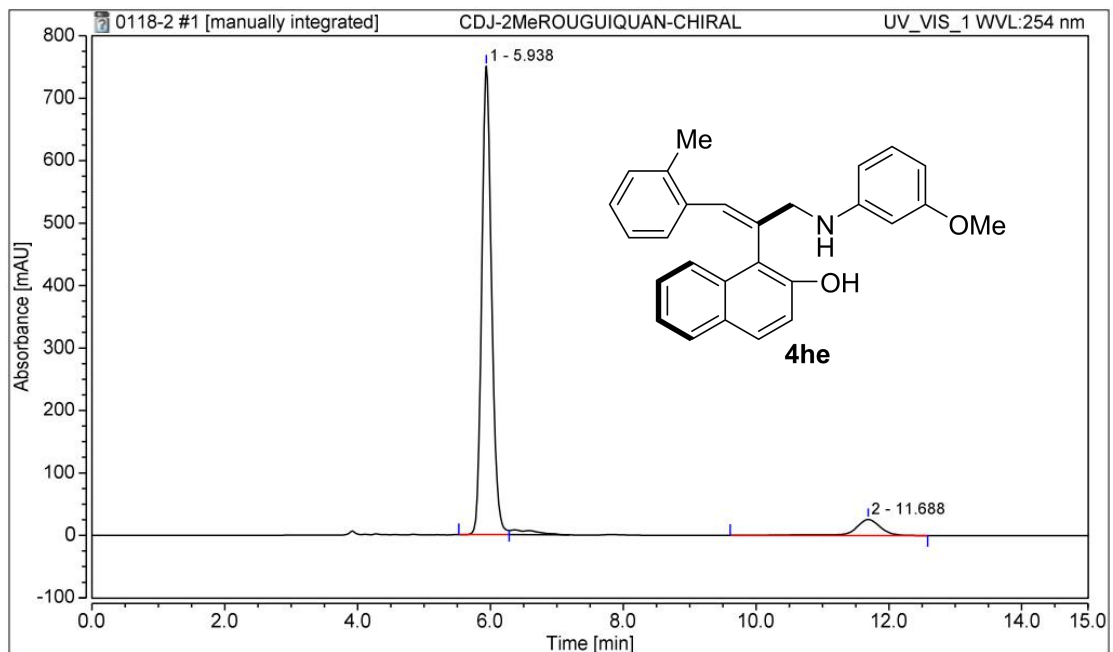

**Integration Results**

| No.           | Retention Time<br>min | Area<br>mAU*min | Height<br>mAU  | Relative Area<br>% | Asymmetry (EP) | Peak Width<br>min |
|---------------|-----------------------|-----------------|----------------|--------------------|----------------|-------------------|
| 1             | 5.938                 | 128.398         | 749.970        | 91.81              | 1.17           | 0.27              |
| 2             | 11.688                | 11.451          | 25.605         | 8.19               | 0.96           | 0.63              |
| <b>Total:</b> |                       | <b>139.849</b>  | <b>775.574</b> | <b>100.00</b>      |                |                   |

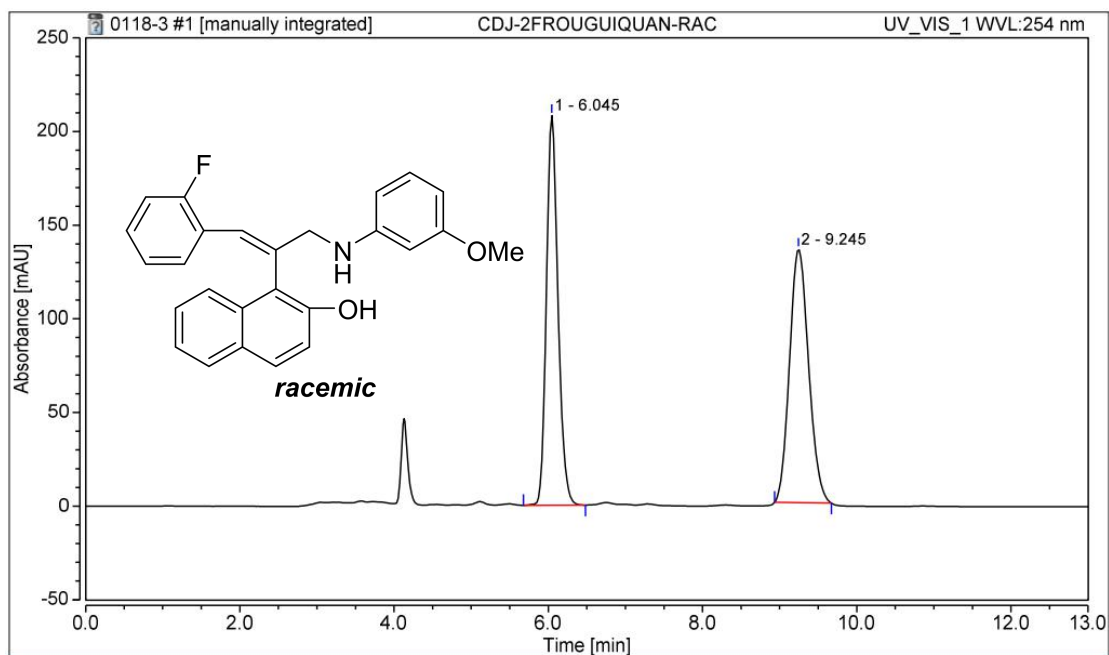

| Integration Results |                       |                 |                |                    |                |                   |
|---------------------|-----------------------|-----------------|----------------|--------------------|----------------|-------------------|
| No.                 | Retention Time<br>min | Area<br>mAU*min | Height<br>mAU  | Relative Area<br>% | Asymmetry (EP) | Peak Width<br>min |
| 1                   | 6.045                 | 36.256          | 208.010        | 48.32              | 1.19           | 0.27              |
| 2                   | 9.245                 | 38.778          | 135.285        | 51.68              | 1.13           | 0.46              |
| <b>Total:</b>       |                       | <b>75.034</b>   | <b>343.296</b> | <b>100.00</b>      |                |                   |

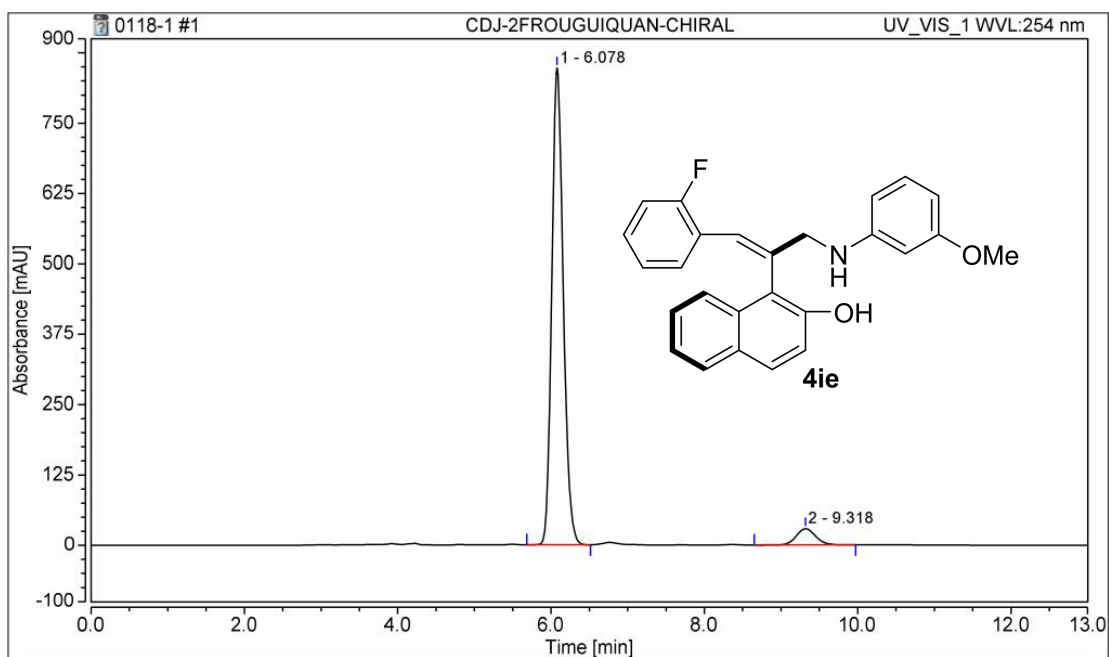

| Integration Results |                       |                 |                |                    |                |                   |
|---------------------|-----------------------|-----------------|----------------|--------------------|----------------|-------------------|
| No.                 | Retention Time<br>min | Area<br>mAU*min | Height<br>mAU  | Relative Area<br>% | Asymmetry (EP) | Peak Width<br>min |
| 1                   | 6.078                 | 146.636         | 847.380        | 94.46              | 1.18           | 0.27              |
| 2                   | 9.318                 | 8.594           | 28.851         | 5.54               | 1.10           | 0.46              |
| <b>Total:</b>       |                       | <b>155.230</b>  | <b>876.230</b> | <b>100.00</b>      |                |                   |

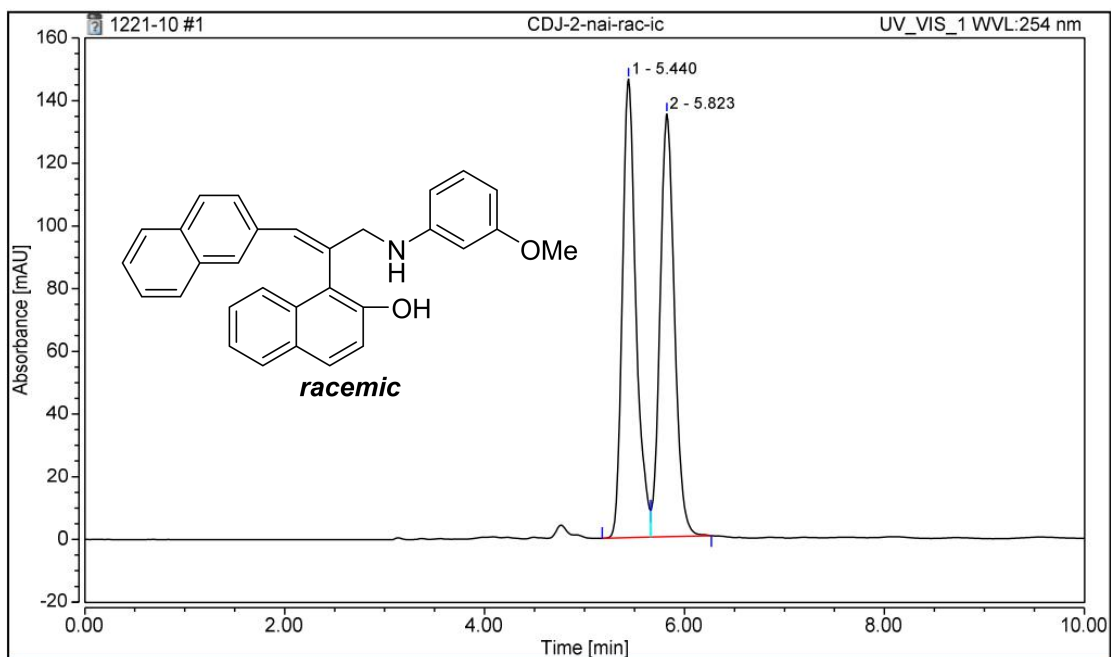

| Integration Results |                       |                 |                |                    |                |                   |
|---------------------|-----------------------|-----------------|----------------|--------------------|----------------|-------------------|
| No.                 | Retention Time<br>min | Area<br>mAU*min | Height<br>mAU  | Relative Area<br>% | Asymmetry (EP) | Peak Width<br>min |
| 1                   | 5.440                 | 23.108          | 146.282        | 50.58              | n.a.           | 0.24              |
| 2                   | 5.823                 | 22.579          | 134.887        | 49.42              | n.a.           | 0.26              |
| <b>Total:</b>       |                       | <b>45.687</b>   | <b>281.169</b> | <b>100.00</b>      |                |                   |

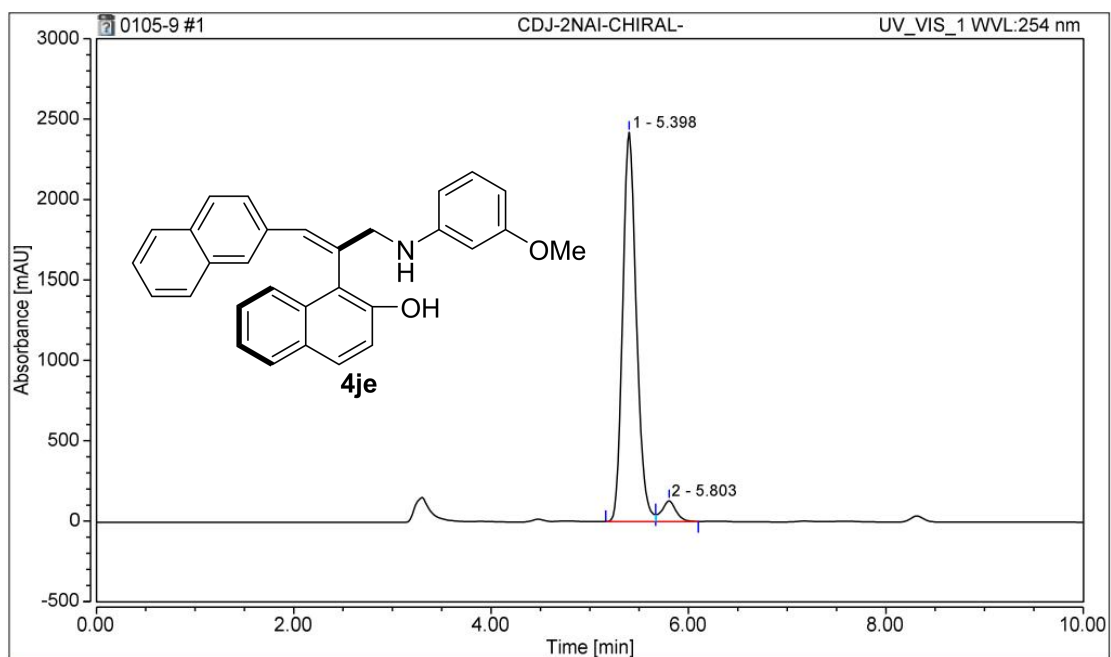

| Integration Results |                       |                 |                 |                    |                |                   |
|---------------------|-----------------------|-----------------|-----------------|--------------------|----------------|-------------------|
| No.                 | Retention Time<br>min | Area<br>mAU*min | Height<br>mAU   | Relative Area<br>% | Asymmetry (EP) | Peak Width<br>min |
| 1                   | 5.398                 | 388.493         | 2420.344        | 94.76              | 1.18           | 0.25              |
| 2                   | 5.803                 | 21.465          | 129.376         | 5.24               | n.a.           | 0.26              |
| <b>Total:</b>       |                       | <b>409.958</b>  | <b>2549.720</b> | <b>100.00</b>      |                |                   |

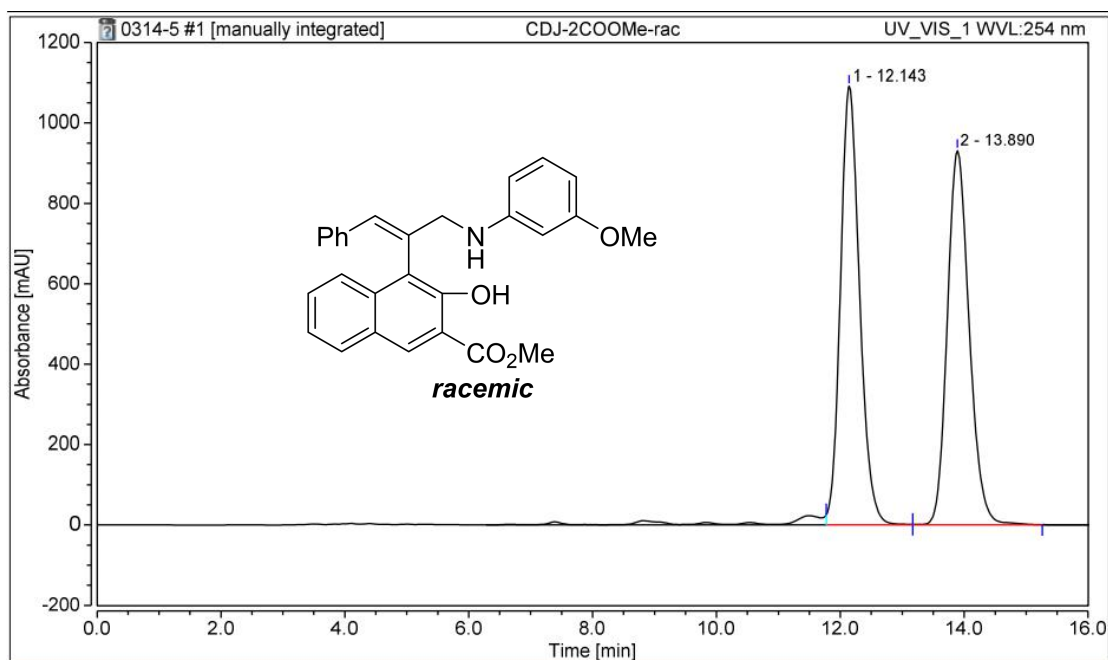

| Integration Results |                       |                 |                 |                    |                |                   |
|---------------------|-----------------------|-----------------|-----------------|--------------------|----------------|-------------------|
| No.                 | Retention Time<br>min | Area<br>mAU*min | Height<br>mAU   | Relative Area<br>% | Asymmetry (EP) | Peak Width<br>min |
| 1                   | 12.143                | 391.822         | 1091.374        | 50.64              | 1.17           | 0.55              |
| 2                   | 13.890                | 381.963         | 931.341         | 49.36              | 1.17           | 0.64              |
| <b>Total:</b>       |                       | <b>773.785</b>  | <b>2022.716</b> | <b>100.00</b>      |                |                   |

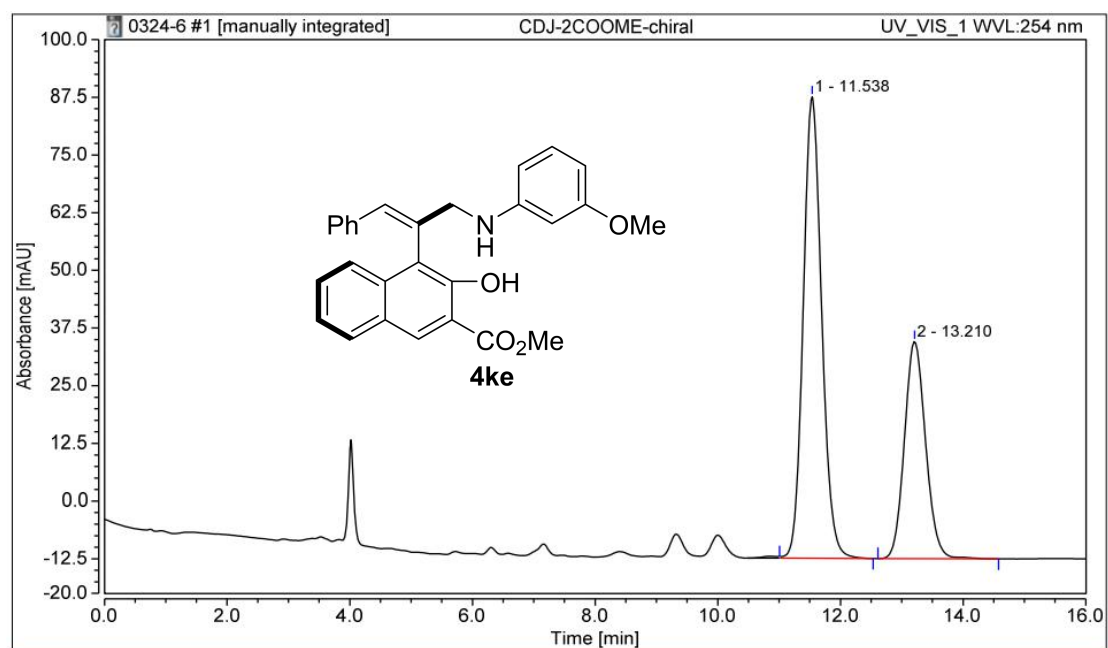

| Integration Results |                       |                 |                |                    |                |                   |
|---------------------|-----------------------|-----------------|----------------|--------------------|----------------|-------------------|
| No.                 | Retention Time<br>min | Area<br>mAU*min | Height<br>mAU  | Relative Area<br>% | Asymmetry (EP) | Peak Width<br>min |
| 1                   | 11.538                | 34.859          | 99.994         | 64.90              | 1.12           | 0.55              |
| 2                   | 13.210                | 18.853          | 47.064         | 35.10              | 1.11           | 0.63              |
| <b>Total:</b>       |                       | <b>53.712</b>   | <b>147.058</b> | <b>100.00</b>      |                |                   |



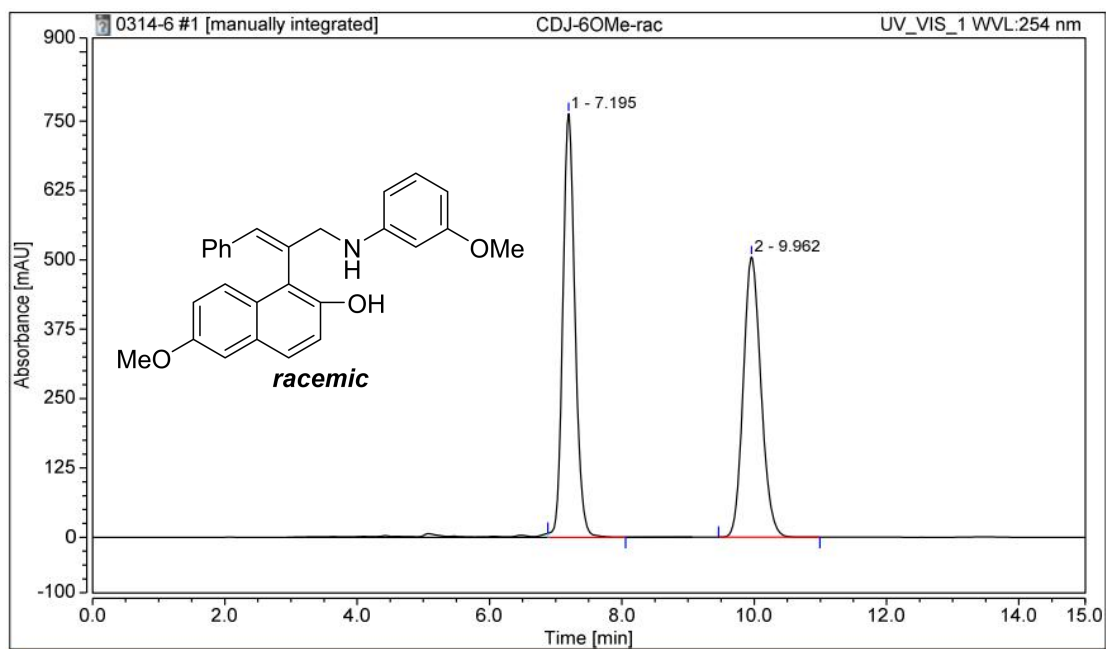

| Integration Results |                    |                |                 |                 |                |                |
|---------------------|--------------------|----------------|-----------------|-----------------|----------------|----------------|
| No.                 | Retention Time min | Area mAU*min   | Height mAU      | Relative Area % | Asymmetry (EP) | Peak Width min |
| 1                   | 7.195              | 162.126        | 763.543         | 50.82           | 1.15           | 0.34           |
| 2                   | 9.962              | 156.916        | 505.254         | 49.18           | 1.14           | 0.48           |
| <b>Total:</b>       |                    | <b>319.042</b> | <b>1268.797</b> | <b>100.00</b>   |                |                |

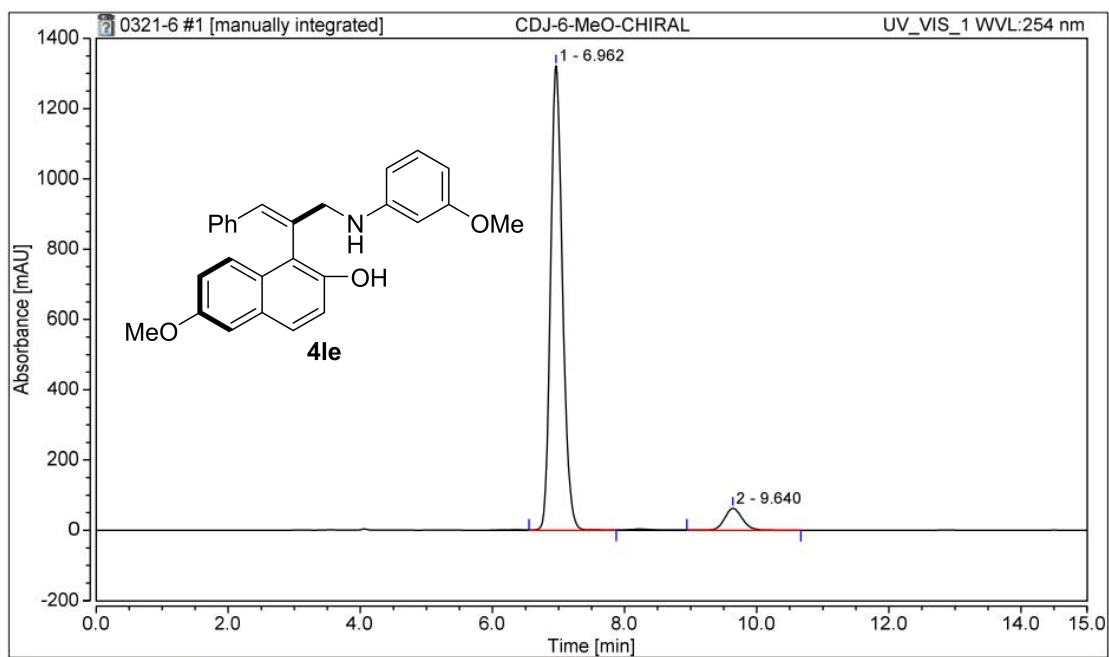

| Integration Results |                    |                |                 |                 |                |                |
|---------------------|--------------------|----------------|-----------------|-----------------|----------------|----------------|
| No.                 | Retention Time min | Area mAU*min   | Height mAU      | Relative Area % | Asymmetry (EP) | Peak Width min |
| 1                   | 6.962              | 275.117        | 1321.221        | 93.36           | 1.19           | 0.33           |
| 2                   | 9.640              | 19.572         | 62.541          | 6.64            | 1.12           | 0.48           |
| <b>Total:</b>       |                    | <b>294.689</b> | <b>1383.762</b> | <b>100.00</b>   | <b>2.32</b>    |                |

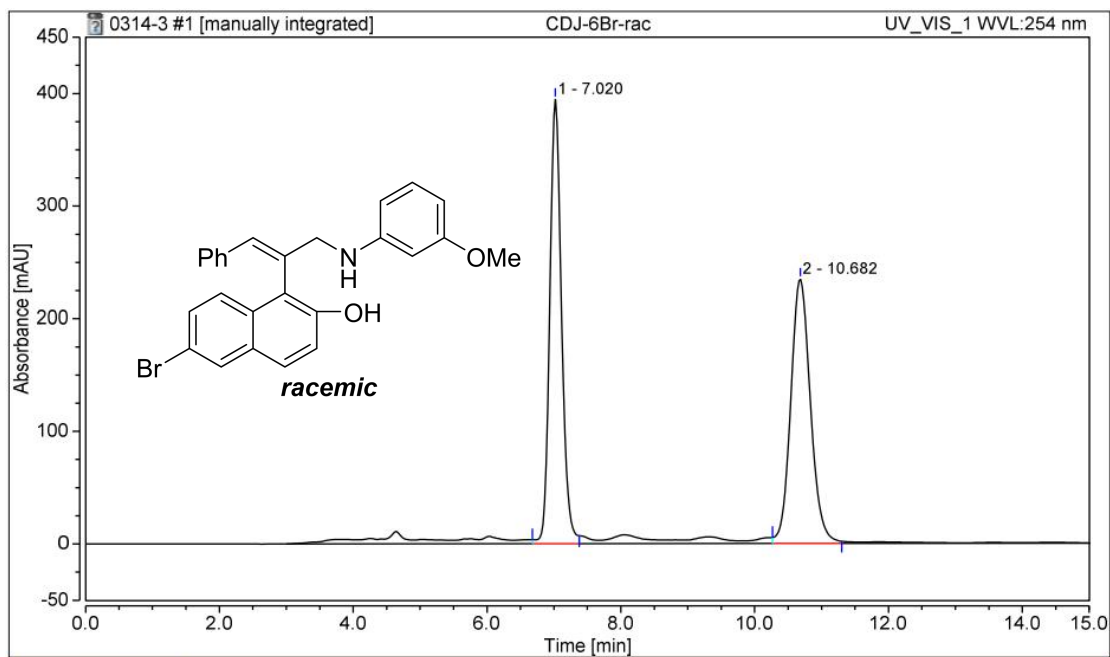

| Integration Results |                       |                 |                |                    |                |                   |
|---------------------|-----------------------|-----------------|----------------|--------------------|----------------|-------------------|
| No.                 | Retention Time<br>min | Area<br>mAU*min | Height<br>mAU  | Relative Area<br>% | Asymmetry (EP) | Peak Width<br>min |
| 1                   | 7.020                 | 80.278          | 394.676        | 50.08              | 1.17           | 0.31              |
| 2                   | 10.682                | 80.025          | 234.831        | 49.92              | 1.11           | 0.52              |
| <b>Total:</b>       |                       | <b>160.303</b>  | <b>629.506</b> | <b>100.00</b>      |                |                   |

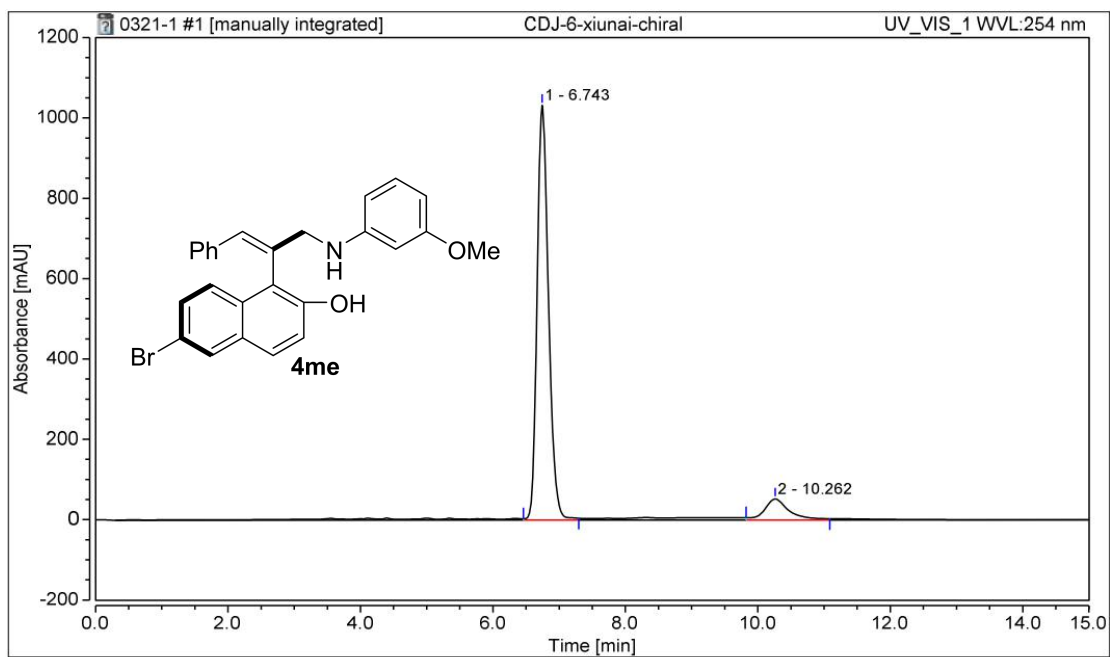

| Integration Results |                       |                 |                 |                    |                |                   |
|---------------------|-----------------------|-----------------|-----------------|--------------------|----------------|-------------------|
| No.                 | Retention Time<br>min | Area<br>mAU*min | Height<br>mAU   | Relative Area<br>% | Asymmetry (EP) | Peak Width<br>min |
| 1                   | 6.743                 | 205.903         | 1032.283        | 89.95              | 1.24           | 0.31              |
| 2                   | 10.262                | 23.013          | 52.405          | 10.05              | n.a.           | 0.60              |
| <b>Total:</b>       |                       | <b>228.916</b>  | <b>1084.688</b> | <b>100.00</b>      |                |                   |



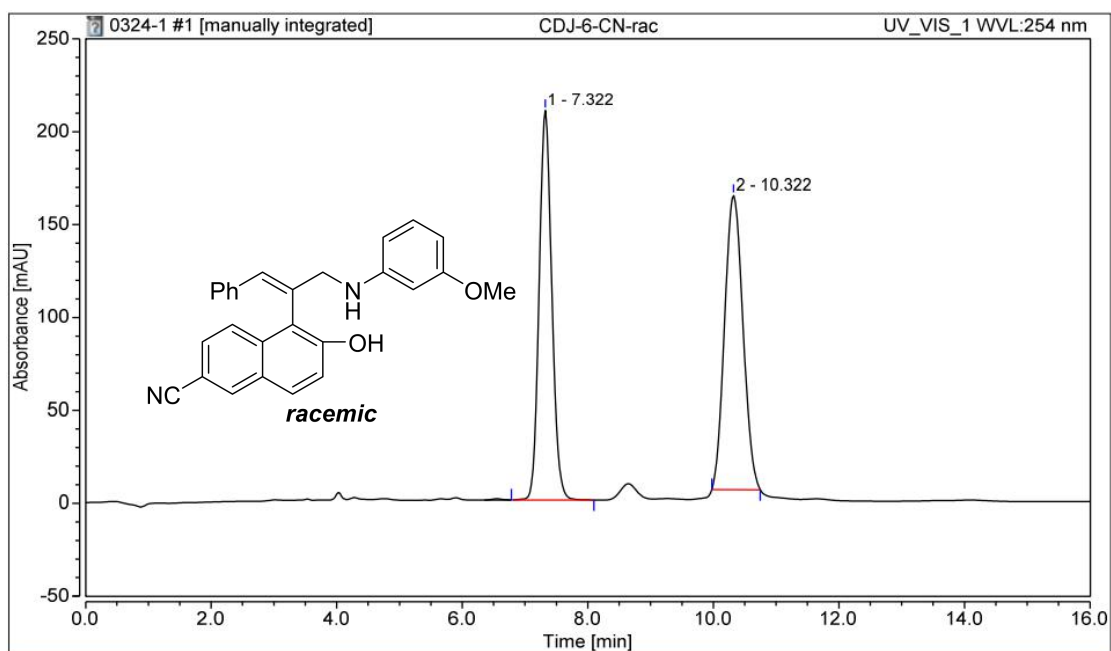

| Integration Results |                       |                 |                |                    |                |                   |
|---------------------|-----------------------|-----------------|----------------|--------------------|----------------|-------------------|
| No.                 | Retention Time<br>min | Area<br>mAU*min | Height<br>mAU  | Relative Area<br>% | Asymmetry (EP) | Peak Width<br>min |
| 1                   | 7.322                 | 48.964          | 209.663        | 47.77              | 1.11           | 0.37              |
| 2                   | 10.322                | 53.538          | 158.456        | 52.23              | 1.09           | 0.55              |
| <b>Total:</b>       |                       | <b>102.502</b>  | <b>368.119</b> | <b>100.00</b>      |                |                   |

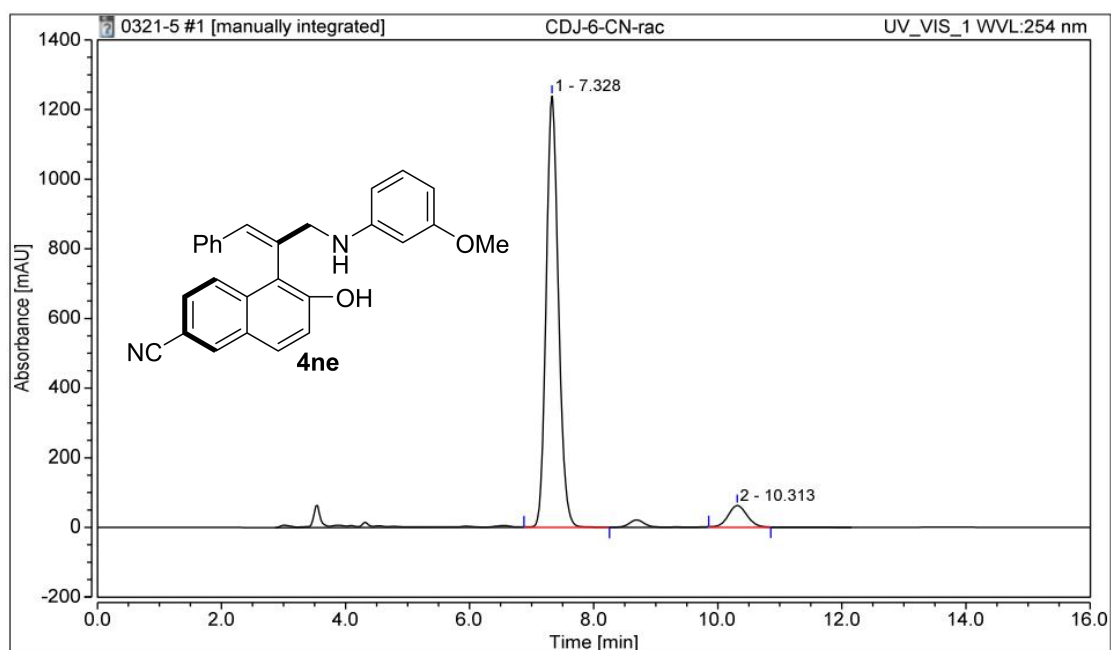

| Integration Results |                       |                 |                 |                    |                |                   |
|---------------------|-----------------------|-----------------|-----------------|--------------------|----------------|-------------------|
| No.                 | Retention Time<br>min | Area<br>mAU*min | Height<br>mAU   | Relative Area<br>% | Asymmetry (EP) | Peak Width<br>min |
| 1                   | 7.328                 | 284.247         | 1238.575        | 92.59              | 1.14           | 0.36              |
| 2                   | 10.313                | 22.740          | 62.774          | 7.41               | 1.06           | 0.56              |
| <b>Total:</b>       |                       | <b>306.987</b>  | <b>1301.349</b> | <b>100.00</b>      |                |                   |

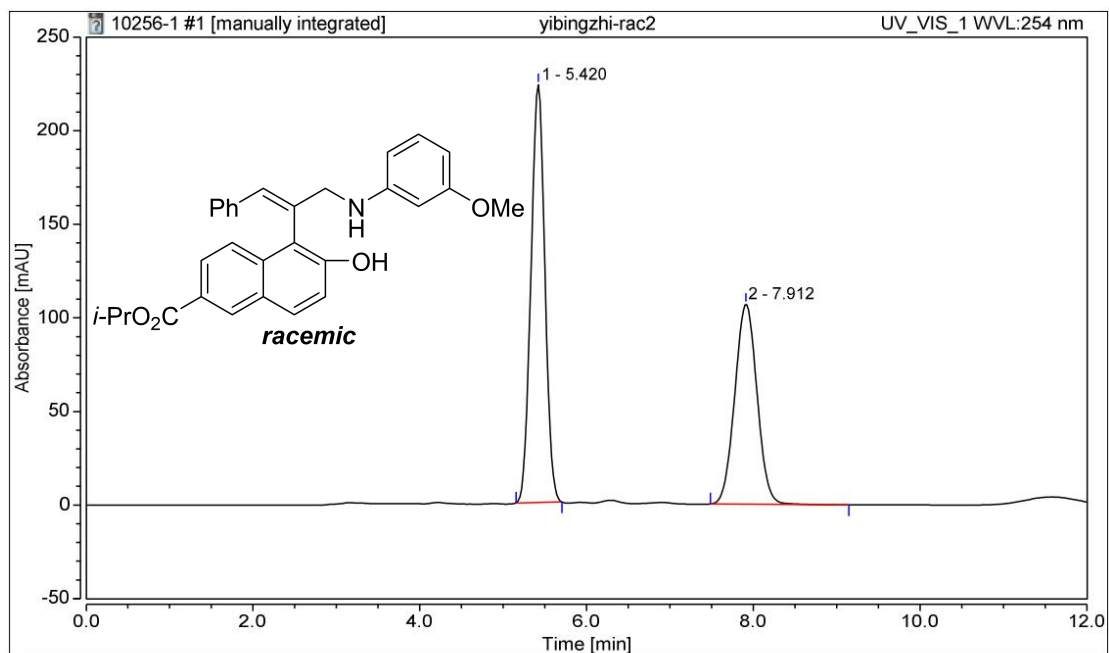

| Integration Results |                       |                 |                |                    |                |                   |
|---------------------|-----------------------|-----------------|----------------|--------------------|----------------|-------------------|
| No.                 | Retention Time<br>min | Area<br>mAU*min | Height<br>mAU  | Relative Area<br>% | Asymmetry (EP) | Peak Width<br>min |
| 1                   | 5.420                 | 40.172          | 223.198        | 52.75              | 1.00           | 0.31              |
| 2                   | 7.912                 | 35.985          | 106.862        | 47.25              | 1.03           | 0.49              |
| <b>Total:</b>       |                       | <b>76.157</b>   | <b>330.060</b> | <b>100.00</b>      |                |                   |

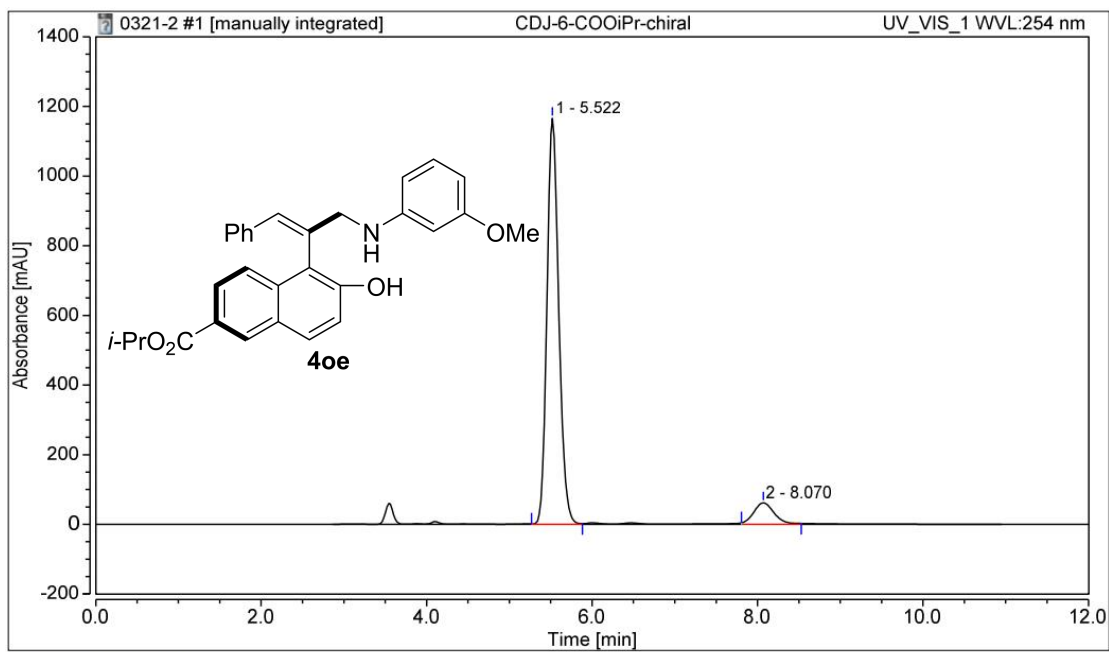

| Integration Results |                       |                 |                 |                    |                |                   |
|---------------------|-----------------------|-----------------|-----------------|--------------------|----------------|-------------------|
| No.                 | Retention Time<br>min | Area<br>mAU*min | Height<br>mAU   | Relative Area<br>% | Asymmetry (EP) | Peak Width<br>min |
| 1                   | 5.522                 | 192.653         | 1166.479        | 91.43              | 1.17           | 0.26              |
| 2                   | 8.070                 | 18.068          | 62.011          | 8.57               | n.a.           | 0.45              |
| <b>Total:</b>       |                       | <b>210.721</b>  | <b>1228.490</b> | <b>100.00</b>      |                |                   |

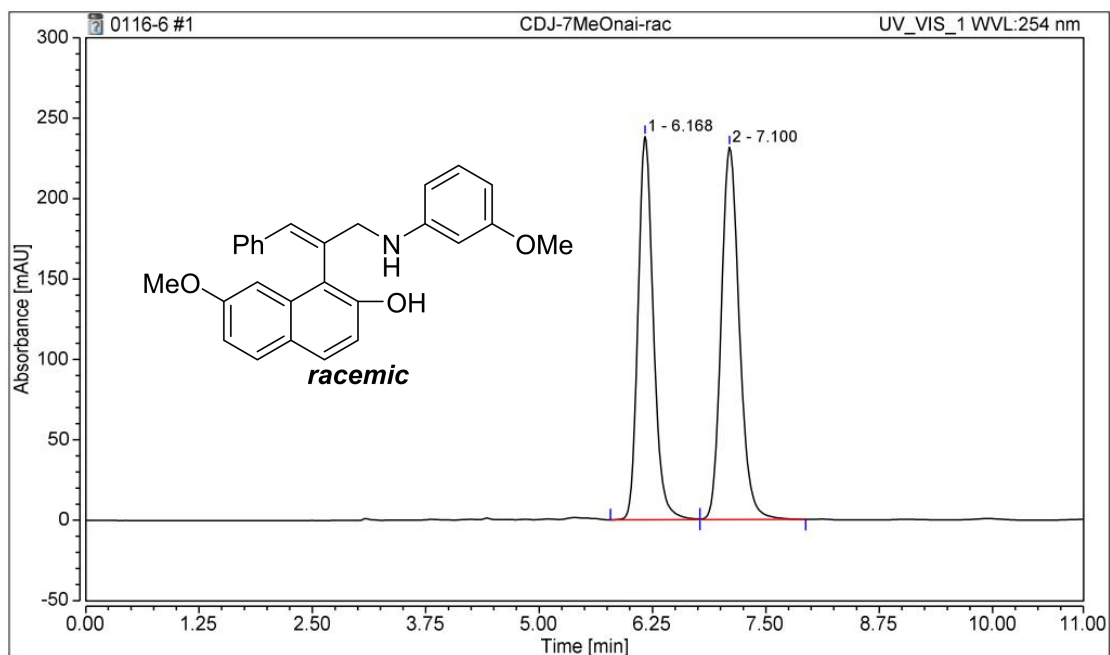

| Integration Results |                       |                 |                |                    |                |                   |
|---------------------|-----------------------|-----------------|----------------|--------------------|----------------|-------------------|
| No.                 | Retention Time<br>min | Area<br>mAU*min | Height<br>mAU  | Relative Area<br>% | Asymmetry (EP) | Peak Width<br>min |
| 1                   | 6.168                 | 46.857          | 238.369        | 46.58              | 1.20           | 0.30              |
| 2                   | 7.100                 | 53.748          | 231.789        | 53.42              | 1.18           | 0.36              |
| <b>Total:</b>       |                       | <b>100.605</b>  | <b>470.158</b> | <b>100.00</b>      |                |                   |

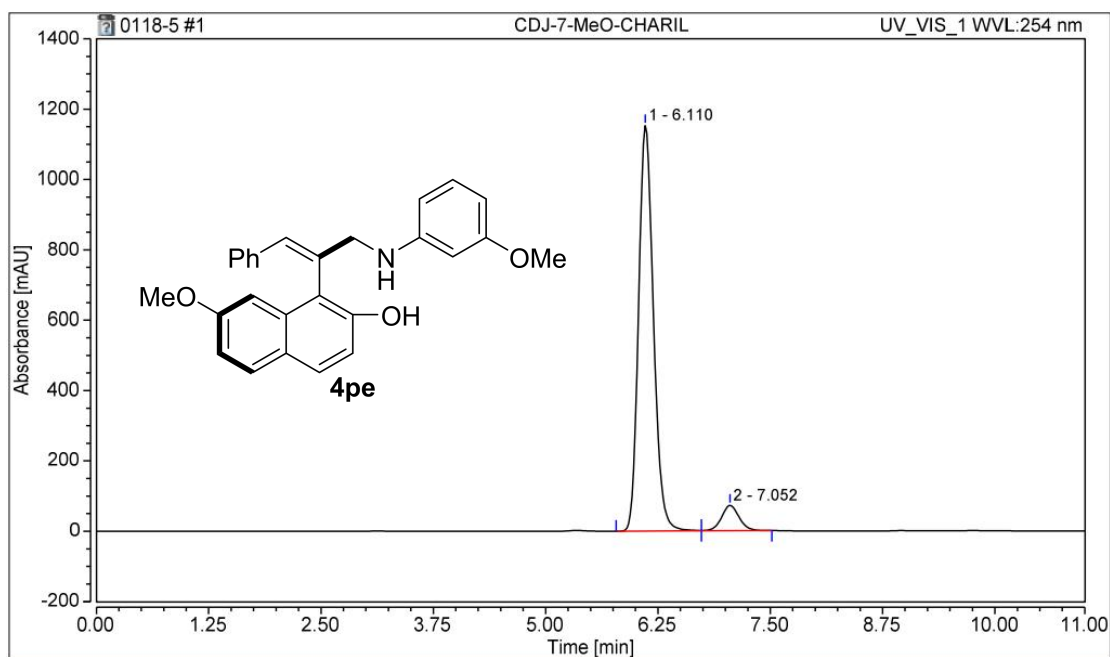

| Integration Results |                       |                 |                 |                    |                |                   |
|---------------------|-----------------------|-----------------|-----------------|--------------------|----------------|-------------------|
| No.                 | Retention Time<br>min | Area<br>mAU*min | Height<br>mAU   | Relative Area<br>% | Asymmetry (EP) | Peak Width<br>min |
| 1                   | 6.110                 | 221.276         | 1152.664        | 93.14              | 1.18           | 0.30              |
| 2                   | 7.052                 | 16.299          | 72.119          | 6.86               | 1.07           | 0.35              |
| <b>Total:</b>       |                       | <b>237.575</b>  | <b>1224.783</b> | <b>100.00</b>      |                |                   |

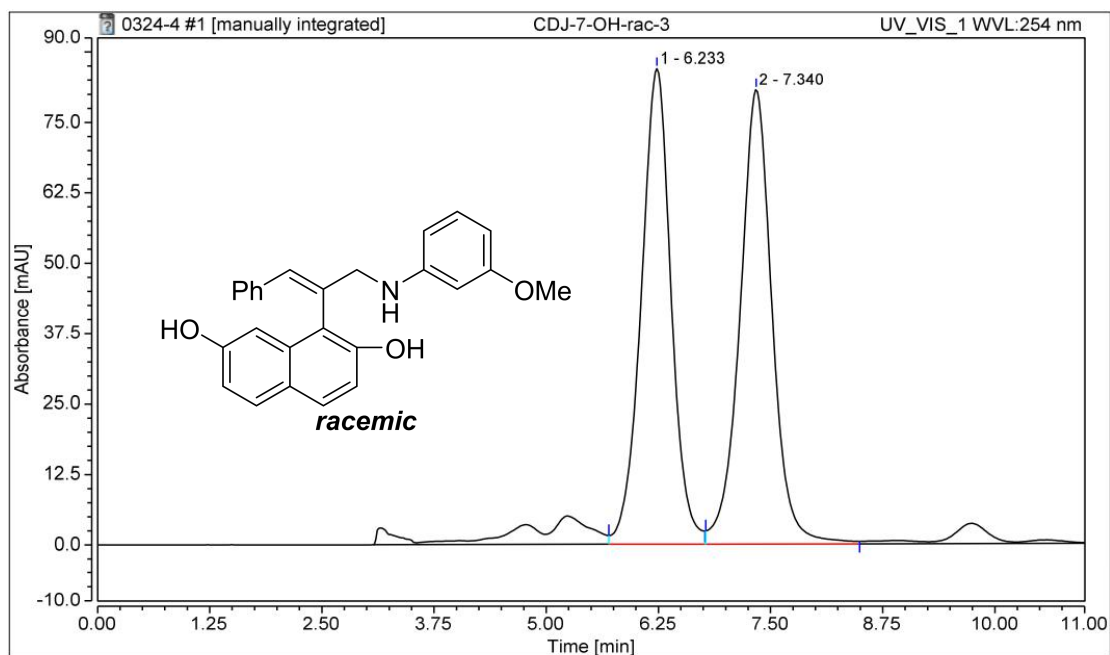

| Integration Results |                       |                 |                |                    |                |                   |
|---------------------|-----------------------|-----------------|----------------|--------------------|----------------|-------------------|
| No.                 | Retention Time<br>min | Area<br>mAU*min | Height<br>mAU  | Relative Area<br>% | Asymmetry (EP) | Peak Width<br>min |
| 1                   | 6.233                 | 32.519          | 84.420         | 49.30              | 0.99           | 0.60              |
| 2                   | 7.340                 | 33.438          | 80.648         | 50.70              | 0.99           | 0.64              |
| <b>Total:</b>       |                       | <b>65.957</b>   | <b>165.068</b> | <b>100.00</b>      |                |                   |

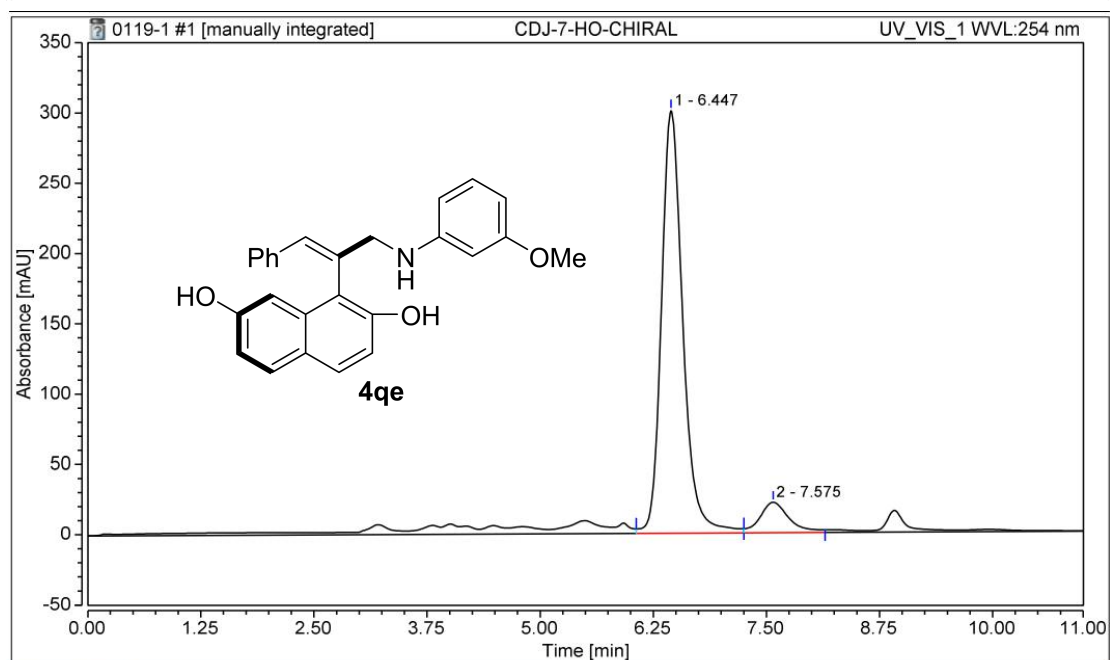

| Integration Results |                       |                 |                |                    |                |                   |
|---------------------|-----------------------|-----------------|----------------|--------------------|----------------|-------------------|
| No.                 | Retention Time<br>min | Area<br>mAU*min | Height<br>mAU  | Relative Area<br>% | Asymmetry (EP) | Peak Width<br>min |
| 1                   | 6.447                 | 82.257          | 300.436        | 91.11              | 1.23           | 0.41              |
| 2                   | 7.575                 | 8.029           | 21.664         | 8.89               | n.a.           | 0.55              |
| <b>Total:</b>       |                       | <b>90.286</b>   | <b>322.100</b> | <b>100.00</b>      |                |                   |

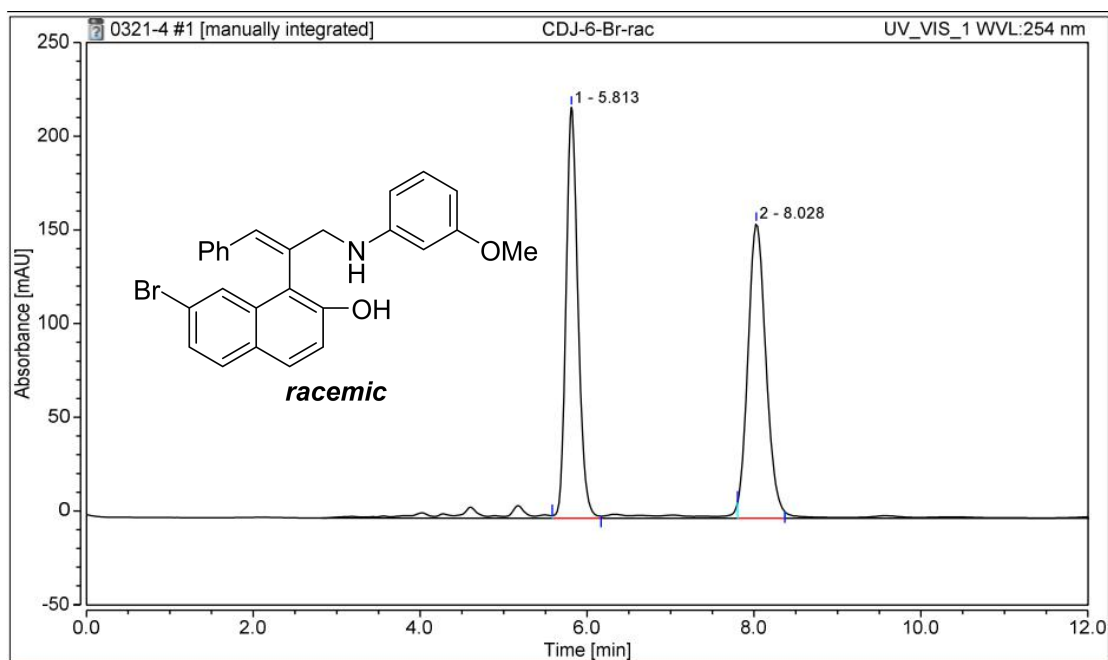

| Integration Results |                    |               |                |                 |                |                |
|---------------------|--------------------|---------------|----------------|-----------------|----------------|----------------|
| No.                 | Retention Time min | Area mAU*min  | Height mAU     | Relative Area % | Asymmetry (EP) | Peak Width min |
| 1                   | 5.813              | 36.314        | 219.255        | 48.10           | 1.19           | 0.26           |
| 2                   | 8.028              | 39.177        | 157.192        | 51.90           | n.a.           | 0.40           |
| <b>Total:</b>       |                    | <b>75.490</b> | <b>376.448</b> | <b>100.00</b>   |                |                |

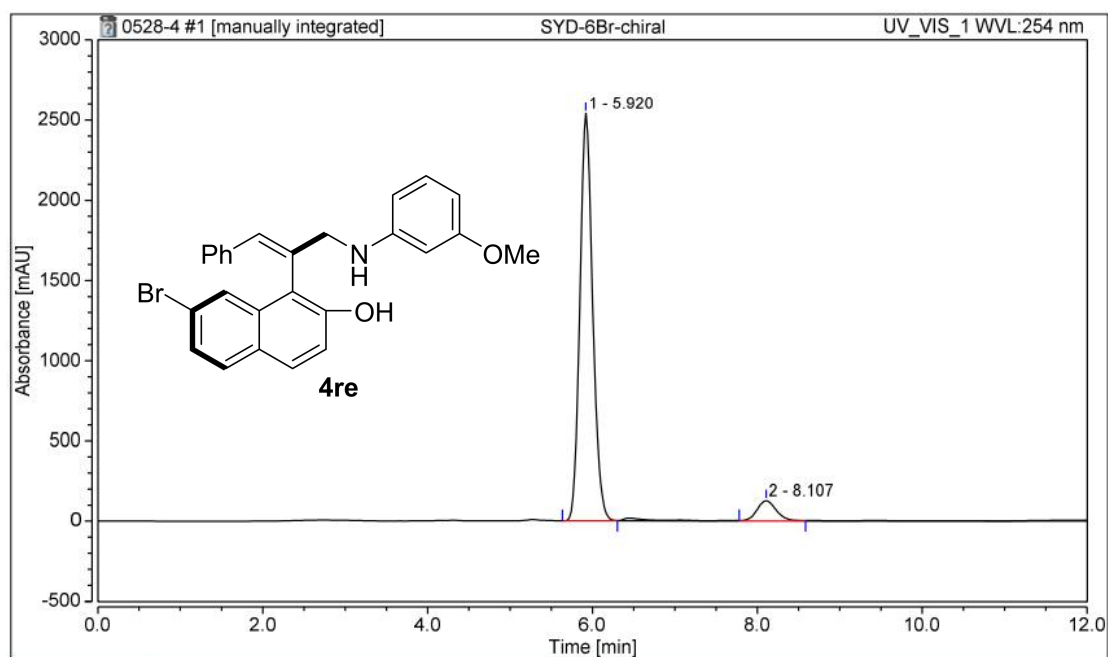

| Integration Results |                    |                |                 |                 |                |                |
|---------------------|--------------------|----------------|-----------------|-----------------|----------------|----------------|
| No.                 | Retention Time min | Area mAU*min   | Height mAU      | Relative Area % | Asymmetry (EP) | Peak Width min |
| 1                   | 5.920              | 456.356        | 2539.496        | 92.98           | 1.15           | 0.28           |
| 2                   | 8.107              | 34.475         | 125.839         | 7.02            | 1.13           | 0.42           |
| <b>Total:</b>       |                    | <b>490.831</b> | <b>2665.335</b> | <b>100.00</b>   |                |                |

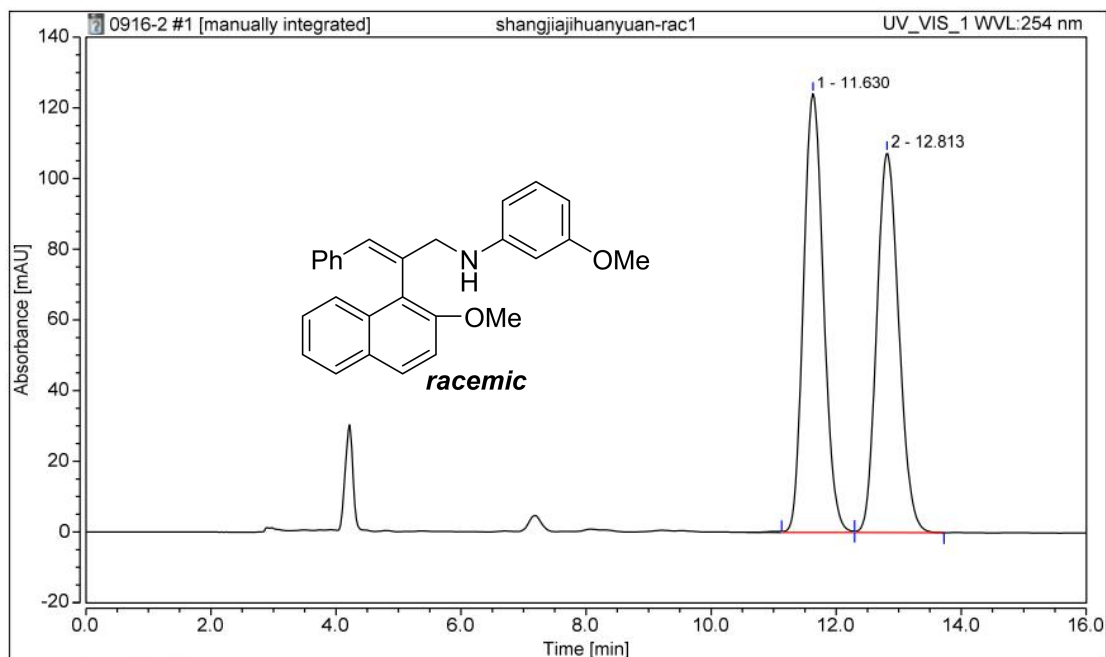

| Integration Results |                    |               |                |                 |                |                |
|---------------------|--------------------|---------------|----------------|-----------------|----------------|----------------|
| No.                 | Retention Time min | Area mAU*min  | Height mAU     | Relative Area % | Asymmetry (EP) | Peak Width min |
| 1                   | 11.630             | 45.840        | 124.219        | 51.06           | 1.13           | 0.58           |
| 2                   | 12.813             | 43.932        | 107.505        | 48.94           | 1.15           | 0.65           |
| <b>Total:</b>       |                    | <b>89.772</b> | <b>231.724</b> | <b>100.00</b>   |                |                |

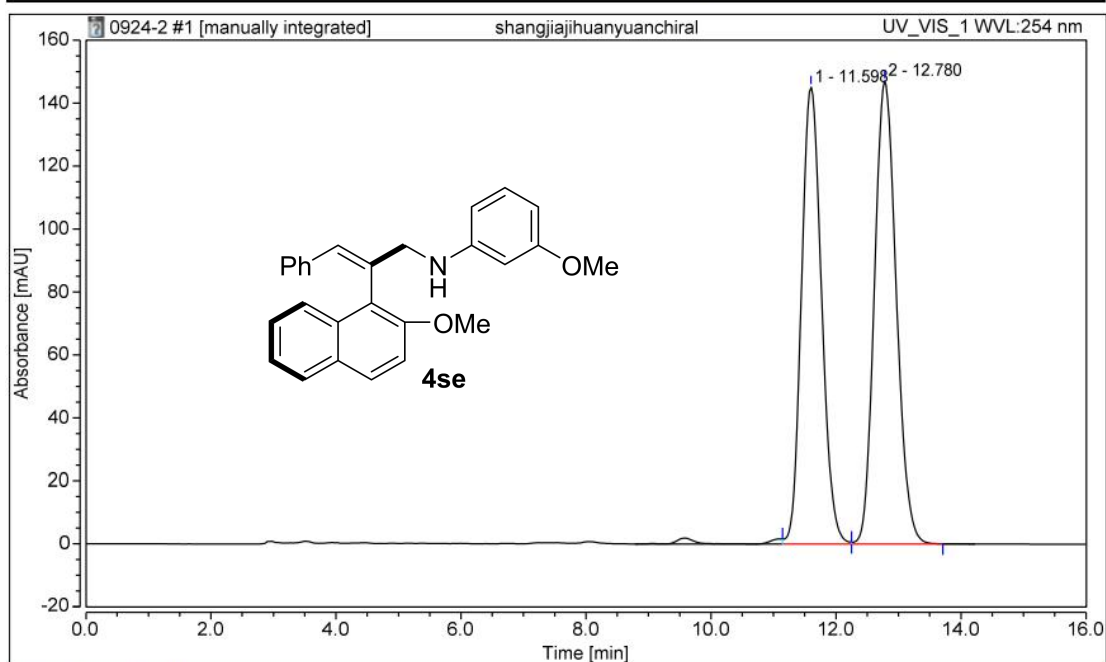

| Integration Results |                    |                |                |                 |                |                |
|---------------------|--------------------|----------------|----------------|-----------------|----------------|----------------|
| No.                 | Retention Time min | Area mAU*min   | Height mAU     | Relative Area % | Asymmetry (EP) | Peak Width min |
| 1                   | 11.598             | 53.926         | 145.219        | 47.52           | 1.15           | 0.58           |
| 2                   | 12.780             | 59.543         | 147.108        | 52.48           | 1.14           | 0.64           |
| <b>Total:</b>       |                    | <b>113.469</b> | <b>292.327</b> | <b>100.00</b>   |                |                |



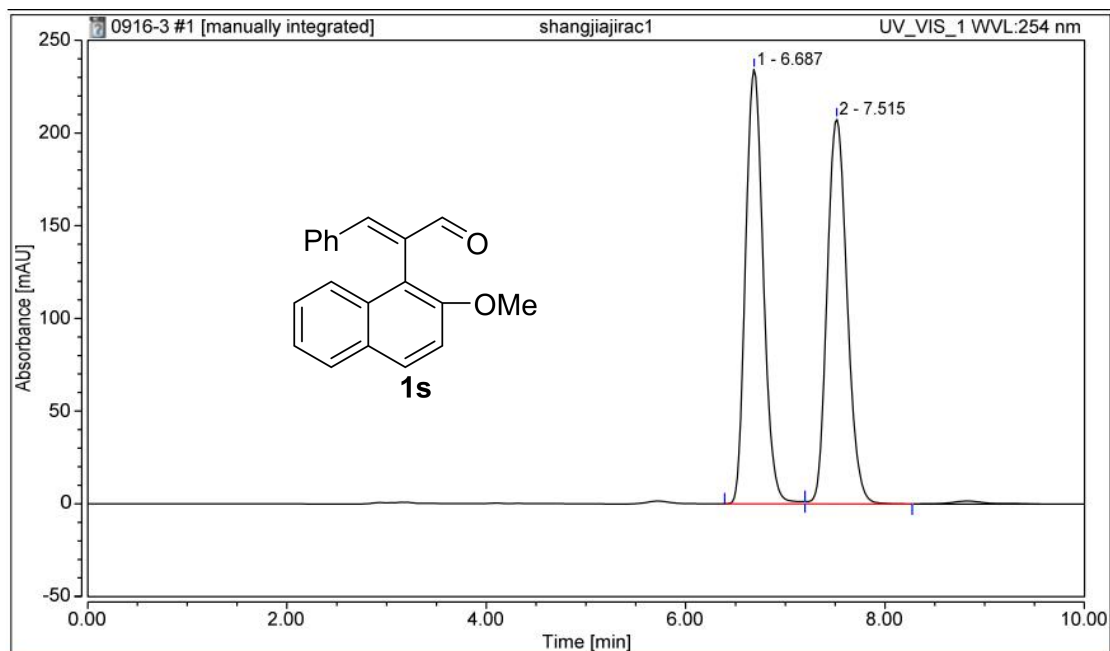

| Integration Results |                       |                 |                |                    |                |                   |
|---------------------|-----------------------|-----------------|----------------|--------------------|----------------|-------------------|
| No.                 | Retention Time<br>min | Area<br>mAU*min | Height<br>mAU  | Relative Area<br>% | Asymmetry (EP) | Peak Width<br>min |
| 1                   | 6.687                 | 48.310          | 234.282        | 50.05              | 1.16           | 0.32              |
| 2                   | 7.515                 | 48.205          | 207.652        | 49.95              | 1.15           | 0.36              |
| <b>Total:</b>       |                       | <b>96.515</b>   | <b>441.934</b> | <b>100.00</b>      |                |                   |

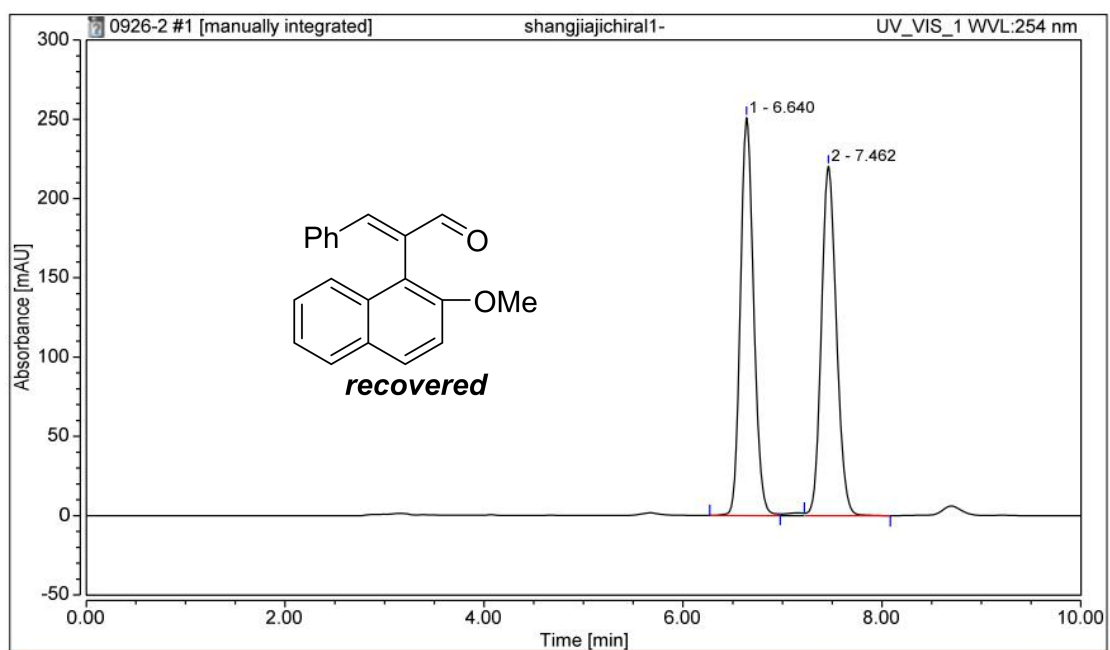

| Integration Results |                       |                 |                |                    |                |                   |
|---------------------|-----------------------|-----------------|----------------|--------------------|----------------|-------------------|
| No.                 | Retention Time<br>min | Area<br>mAU*min | Height<br>mAU  | Relative Area<br>% | Asymmetry (EP) | Peak Width<br>min |
| 1                   | 6.640                 | 38.744          | 251.015        | 50.04              | 1.14           | 0.24              |
| 2                   | 7.462                 | 38.676          | 220.418        | 49.96              | 1.13           | 0.28              |
| <b>Total:</b>       |                       | <b>77.421</b>   | <b>471.433</b> | <b>100.00</b>      |                |                   |

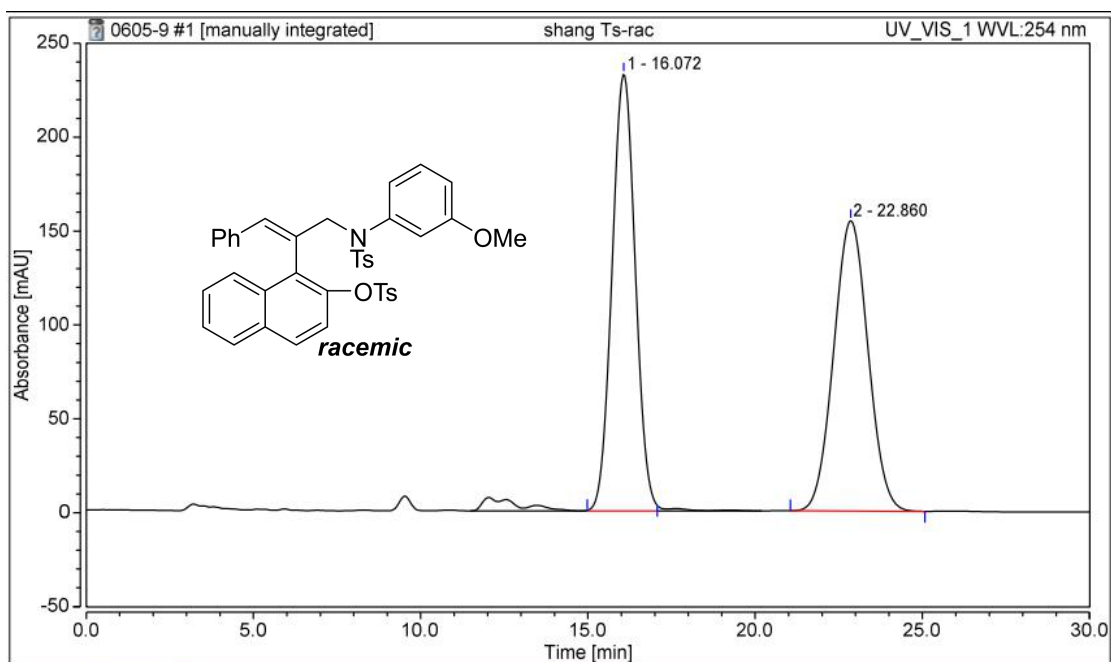

| Integration Results |                    |                |                |                 |                |                |
|---------------------|--------------------|----------------|----------------|-----------------|----------------|----------------|
| No.                 | Retention Time min | Area mAU*min   | Height mAU     | Relative Area % | Asymmetry (EP) | Peak Width min |
| 1                   | 16.072             | 187.041        | 232.720        | 50.38           | 1.03           | 1.28           |
| 2                   | 22.860             | 184.230        | 154.646        | 49.62           | 1.04           | 1.89           |
| <b>Total:</b>       |                    | <b>371.271</b> | <b>387.366</b> | <b>100.00</b>   |                |                |

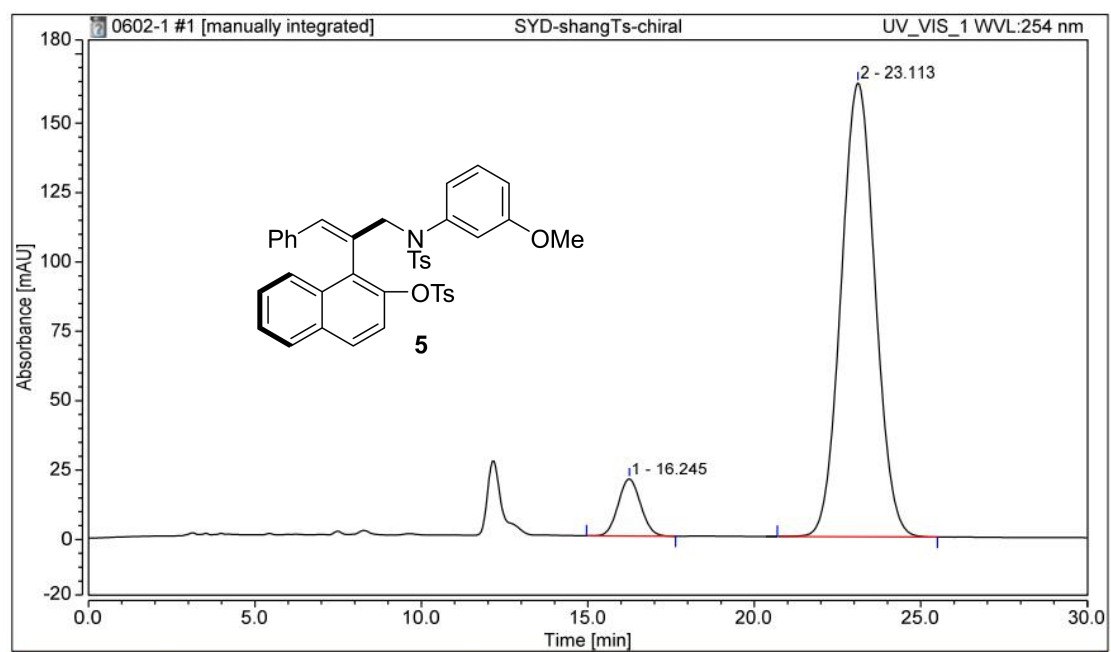

| Integration Results |                    |                |                |                 |                |                |
|---------------------|--------------------|----------------|----------------|-----------------|----------------|----------------|
| No.                 | Retention Time min | Area mAU*min   | Height mAU     | Relative Area % | Asymmetry (EP) | Peak Width min |
| 1                   | 16.245             | 16.070         | 20.534         | 7.67            | 1.05           | 1.24           |
| 2                   | 23.113             | 193.376        | 163.570        | 92.33           | 1.05           | 1.88           |
| <b>Total:</b>       |                    | <b>209.446</b> | <b>184.103</b> | <b>100.00</b>   |                |                |
